# Supplementary material
Source: PubMed Central journal article supplement (PMC2742427)
Supplement: NIHMS115748-supplement-Supplementary_Table_2.pdf [file NIHMS115748-supplement-Supplementary_Table_2.pdf]

**Supplementary Table 2: MIAPE-MS Data for Identified Proteins**

| Protein Name                     | Accession No. | Peptide Count | Protein Score |            | Protein Score |                         | Total Ion Score | Total Ion C.I. % | Best Ion Score | Best Ion         |       | % Coverage |
|----------------------------------|---------------|---------------|---------------|------------|---------------|-------------------------|-----------------|------------------|----------------|------------------|-------|------------|
|                                  |               |               | Score         | C.I.%      | Score         | C.I.%                   |                 |                  |                | Score            | C.I.% |            |
| Neurofilament medium polypeptide | spt P12839    | 11            | 98            | 100        | 31            | 95.97                   | 18              | 19.54            | 21.7           |                  |       |            |
| Peptide Information              |               |               |               |            |               |                         |                 |                  |                |                  |       |            |
| Calc. Mass                       | Obsrv. Mass   | ± da          | ± ppm         | Start Seq. | End Seq.      | Sequence                | Ion Score       | C. I. %          | Modification   |                  |       |            |
| 858.4791                         | 858.4767      | -0.0024       | -3            | 16         | 22            | RVPTETR                 |                 |                  |                |                  |       |            |
| 909.4312                         | 909.4222      | -0.009        | -10           | 314        | 320           | EEIAEYR                 |                 |                  |                |                  |       |            |
| 980.4795                         | 980.474       | -0.0055       | -6            | 28         | 37            | VSGSPSSGFR              |                 |                  |                |                  |       |            |
| 1072.5382                        | 1072.5387     | 0.0005        | 0             | 102        | 110           | EQLQGLNDR               |                 |                  |                |                  |       |            |
| 1072.5382                        | 1072.5387     | 0.0005        | 0             | 102        | 110           | EQLQGLNDR               |                 |                  |                |                  |       |            |
| 1159.6066                        | 1159.6035     | -0.0031       | -3            | 194        | 203           | LRDDTEAAIR              | 16              | 0                |                |                  |       |            |
| 1159.6066                        | 1159.6035     | -0.0031       | -3            | 194        | 203           | LRDDTEAAIR              |                 |                  |                |                  |       |            |
| 1180.6321                        | 1180.6343     | 0.0022        | 2             | 127        | 136           | EIEAEIHALR              |                 |                  |                |                  |       |            |
| 1180.6321                        | 1180.6343     | 0.0022        | 2             | 127        | 136           | EIEAEIHALR              |                 |                  |                |                  |       |            |
| 1281.6508                        | 1281.6483     | -0.0025       | -2            | 391        | 401           | MALDIEIAAYR             |                 |                  |                | Oxidation (M)[1] |       |            |
| 1281.6508                        | 1281.6483     | -0.0025       | -2            | 391        | 401           | MALDIEIAAYR             |                 |                  |                | Oxidation (M)[1] |       |            |
| 1404.7482                        | 1404.7605     | 0.0123        | 9             | 223        | 234           | VQSLQDEVAFLR            | 17              | 0                |                |                  |       |            |
| 1404.7482                        | 1404.7605     | 0.0123        | 9             | 223        | 234           | VQSLQDEVAFLR            |                 |                  |                |                  |       |            |
| 1530.7506                        | 1530.7688     | 0.0182        | 12            | 98         | 110           | SNEKEQLQGLNDR           |                 |                  |                |                  |       |            |
| 1585.8003                        | 1585.7633     | -0.037        | -23           | 155        | 167           | ELRATLEMVNHEK           |                 |                  |                | Oxidation (M)[8] |       |            |
| 1585.8003                        | 1585.7633     | -0.037        | -23           | 155        | 167           | ELRATLEMVNHEK           |                 |                  |                | Oxidation (M)[8] |       |            |
| 1770.881                         | 1770.8979     | 0.0169        | 10            | 411        | 426           | FSTFSGSITGPLYTHR        |                 |                  |                |                  |       |            |
| 1770.881                         | 1770.8979     | 0.0169        | 10            | 411        | 426           | FSTFSGSITGPLYTHR        | 13              | 0                |                |                  |       |            |
| 1801.8463                        | 1801.861      | 0.0147        | 8             | 139        | 154           | QASHAQLGDAYDQEIR        |                 |                  |                |                  |       |            |
| 1801.8463                        | 1801.861      | 0.0147        | 8             | 139        | 154           | QASHAQLGDAYDQEIR        | 35              | 92.524           |                |                  |       |            |
| 1904.9097                        | 1904.922      | 0.0123        | 6             | 168        | 183           | AQVQLDSDHLEEDIHR        | 35              | 92.35            |                |                  |       |            |
| 1904.9097                        | 1904.922      | 0.0123        | 6             | 168        | 183           | AQVQLDSDHLEEDIHR        |                 |                  |                |                  |       |            |
| 2440.1487                        | 2440.1406     | -0.0081       | -3            | 351        | 370           | HNHDLSSYQDTIQLENELR     |                 |                  |                |                  |       |            |
| 2589.2903                        | 2589.2759     | -0.0144       | -6            | 235        | 257           | SNHEEEVADLLAQIQASHITVER |                 |                  |                |                  |       |            |
| 2589.2903                        | 2589.2759     | -0.0144       | -6            | 235        | 257           | SNHEEEVADLLAQIQASHITVER |                 |                  |                |                  |       |            |

  

| Protein Name                    | Accession No. | Peptide Count | Protein Score |            | Protein Score |                  | Total Ion Score | Total Ion C.I. % | Best Ion Score | Best Ion          |       | % Coverage |
|---------------------------------|---------------|---------------|---------------|------------|---------------|------------------|-----------------|------------------|----------------|-------------------|-------|------------|
|                                 |               |               | Score         | C.I.%      | Score         | C.I.%            |                 |                  |                | Score             | C.I.% |            |
| Neurofilament triplet L protein | spt P19527    | 15            | 174           | 100        | 73            | 100              | 25              | 46.848           | 22.3           |                   |       |            |
| Peptide Information             |               |               |               |            |               |                  |                 |                  |                |                   |       |            |
| Calc. Mass                      | Obsrv. Mass   | ± da          | ± ppm         | Start Seq. | End Seq.      | Sequence         | Ion Score       | C. I. %          | Modification   |                   |       |            |
| 801.4213                        | 801.4008      | -0.0205       | -26           | 157        | 163           | QALQGER          |                 |                  |                |                   |       |            |
| 801.4213                        | 801.4008      | -0.0205       | -26           | 157        | 163           | QALQGER          |                 |                  |                |                   |       |            |
| 869.4515                        | 869.4414      | -0.0101       | -12           | 100        | 106           | FASFIER          | 6               | 0                |                |                   |       |            |
| 869.4515                        | 869.4414      | -0.0101       | -12           | 100        | 106           | FASFIER          |                 |                  |                |                   |       |            |
| 920.4948                        | 920.4838      | -0.011        | -12           | 16         | 22            | RYVETPR          |                 |                  |                |                   |       |            |
| 1021.5312                       | 1021.5305     | -0.0007       | -1            | 136        | 143           | ALYEQEIR         | 24              | 28.465           |                |                   |       |            |
| 1021.5312                       | 1021.5305     | -0.0007       | -1            | 136        | 143           | ALYEQEIR         |                 |                  |                |                   |       |            |
| 1024.4945                       | 1024.4996     | 0.0051        | 5             | 177        | 184           | YEEEVLSR         |                 |                  |                |                   |       |            |
| 1024.4945                       | 1024.4996     | 0.0051        | 5             | 177        | 184           | YEEEVLSR         | 8               | 0                |                |                   |       |            |
| 1072.5382                       | 1072.5426     | 0.0044        | 4             | 91         | 99            | AQLQDLNDR        |                 |                  |                |                   |       |            |
| 1072.5382                       | 1072.5426     | 0.0044        | 4             | 91         | 99            | AQLQDLNDR        | 13              | 0                |                |                   |       |            |
| 1154.7144                       | 1154.7183     | 0.0039        | 3             | 116        | 125           | VLEAELLVLR       |                 |                  |                |                   |       |            |
| 1154.7144                       | 1154.7183     | 0.0039        | 3             | 116        | 125           | VLEAELLVLR       | 25              | 46.848           |                |                   |       |            |
| 1281.6508                       | 1281.6486     | -0.0022       | -2            | 380        | 390           | MALDIEIAAYR      |                 |                  |                | Oxidation (M)[1]  |       |            |
| 1281.6508                       | 1281.6486     | -0.0022       | -2            | 380        | 390           | MALDIEIAAYR      |                 |                  |                | Oxidation (M)[1]  |       |            |
| 1405.7434                       | 1405.7041     | -0.0393       | -28           | 136        | 146           | ALYEQEIRDLR      |                 |                  |                |                   |       |            |
| 1410.7185                       | 1410.7251     | 0.0066        | 5             | 212        | 223           | IDSLMDEIAFLK     |                 |                  |                | Oxidation (M)[5]  |       |            |
| 1723.7955                       | 1723.8022     | 0.0067        | 4             | 422        | 437           | SAYSGLQSSSYLMSAR |                 |                  |                | Oxidation (M)[13] |       |            |
| 1723.7955                       | 1723.8022     | 0.0067        | 4             | 422        | 437           | SAYSGLQSSSYLMSAR | 8               | 0                |                | Oxidation (M)[13] |       |            |
| 1747.8497                       | 1747.8656     | 0.0159        | 9             | 37         | 53            | SAYSSYAPVSSLSVR  |                 |                  |                |                   |       |            |

|           |           |         |     |     |                            |   |   |
|-----------|-----------|---------|-----|-----|----------------------------|---|---|
| 1747.8497 | 1747.8656 | 0.0159  | 9   | 37  | 53 SAYSSYSAPVSSSLSVR       | 5 | 0 |
| 1922.9719 | 1922.932  | -0.0399 | -21 | 91  | 106 AQLQDLNDRFASFIER       |   |   |
| 2021.8304 | 2021.8333 | 0.0029  | 1   | 482 | 499 EKEEGEEEEGAEAAAAAK     |   |   |
| 2295.1252 | 2295.126  | 0.0008  | 0   | 400 | 421 LSFTSVGSITSGYSQSSQVFGR |   |   |
| 2295.1252 | 2295.126  | 0.0008  | 0   | 400 | 421 LSFTSVGSITSGYSQSSQVFGR |   |   |

| Protein Name                                | Accession No. | Peptide Count | Protein Score | Protein Score C.I.% | Total Ion Score | Total Ion C.I. % | Best Ion Score | Best Ion C.I.% | % Coverage |
|---------------------------------------------|---------------|---------------|---------------|---------------------|-----------------|------------------|----------------|----------------|------------|
| Dihydropyrimidase related protein-2 (DRP-2) | XP_341343.1   | 17            | 321           | 100                 | 184             |                  | 100            | 41             | 43.4       |

| Peptide Information | Calc. Mass | Obsrv. Mass | ± da    | ± ppm | Start Seq. | End Seq. | Sequence                    | Ion Score | C. I. % | Modification            |
|---------------------|------------|-------------|---------|-------|------------|----------|-----------------------------|-----------|---------|-------------------------|
|                     | 813.4213   | 813.444     | 0.0227  | 28    | 57         | 63       | TIEAHSR                     |           |         |                         |
|                     | 813.4213   | 813.444     | 0.0227  | 28    | 57         | 63       | TIEAHSR                     |           |         |                         |
|                     | 844.4999   | 844.535     | 0.0351  | 42    | 486        | 492      | SRLAELR                     |           |         |                         |
|                     | 844.4999   | 844.535     | 0.0351  | 42    | 486        | 492      | SRLAELR                     |           |         |                         |
|                     | 908.4988   | 908.5211    | 0.0223  | 25    | 391        | 397      | VFNLVPR                     | 41        | 97.859  |                         |
|                     | 908.4988   | 908.5211    | 0.0223  | 25    | 391        | 397      | VFNLVPR                     |           |         |                         |
|                     | 1015.553   | 1015.5809   | 0.0279  | 27    | 259        | 268      | SAAEVIAQAR                  |           |         |                         |
|                     | 1015.553   | 1015.5809   | 0.0279  | 27    | 259        | 268      | SAAEVIAQAR                  | 24        | 0       |                         |
|                     | 1140.6088  | 1140.6323   | 0.0235  | 21    | 472        | 480      | KPFPDFVYK                   |           |         |                         |
|                     | 1140.6088  | 1140.6323   | 0.0235  | 21    | 472        | 480      | KPFPDFVYK                   | 10        | 0       |                         |
|                     | 1262.6296  | 1262.6587   | 0.0291  | 23    | 147        | 157      | GIQEEMALVK                  |           |         | Oxidation (M)[6]        |
|                     | 1310.6885  | 1310.7094   | 0.0209  | 16    | 64         | 75       | MVIPGGIDVHTR                |           |         | Oxidation (M)[1]        |
|                     | 1310.6885  | 1310.7094   | 0.0209  | 16    | 64         | 75       | MVIPGGIDVHTR                | 14        | 0       | Oxidation (M)[1]        |
|                     | 1323.7631  | 1323.7733   | 0.0102  | 8     | 44         | 56       | QIGENLIVPGGVK               |           |         |                         |
|                     | 1682.8707  | 1682.8927   | 0.022   | 13    | 452        | 467      | IVLEDGTLHVTEGSGR            |           |         |                         |
|                     | 1682.8707  | 1682.8927   | 0.022   | 13    | 452        | 467      | IVLEDGTLHVTEGSGR            | 27        | 36.518  |                         |
|                     | 1741.8062  | 1741.8192   | 0.013   | 7     | 375        | 390      | MDENQFVAVTSTNAAK            |           |         | Oxidation (M)[1]        |
|                     | 1792.8348  | 1792.8547   | 0.0199  | 11    | 346        | 361      | DNFTLIPEGTNGTEER            |           |         |                         |
|                     | 1792.8348  | 1792.8547   | 0.0199  | 11    | 346        | 361      | DNFTLIPEGTNGTEER            | 27        | 44.837  |                         |
|                     | 1822.9368  | 1822.9402   | 0.0034  | 2     | 239        | 254      | SITIANQNTNPLYVK             |           |         | Carbamidomethyl (C)[10] |
|                     | 2169.0684  | 2169.0784   | 0.01    | 5     | 533        | 552      | NLHQSGFSLSGAQIDDNI          |           |         |                         |
|                     | 2169.0684  | 2169.0784   | 0.01    | 5     | 533        | 552      | NLHQSGFSLSGAQIDDNI          | 25        | 16.891  |                         |
|                     | 2182.9055  | 2182.9775   | 0.072   | 33    | 76         | 94       | FQMPDQGMTSADFFQGTK          |           |         | Oxidation (M)[3,8]      |
|                     | 2365.0903  | 2365.0908   | 0.0005  | 0     | 24         | 43       | IVNDDQSFYADIYMEDGLIK        |           |         | Oxidation (M)[14]       |
|                     | 2377.1741  | 2377.1721   | -0.002  | -1    | 190        | 211      | DIGAIAQVHAENGDIIEEQQR       | 16        | 0       |                         |
|                     | 2377.1741  | 2377.1721   | -0.002  | -1    | 190        | 211      | DIGAIAQVHAENGDIIEEQQR       |           |         |                         |
|                     | 2900.5112  | 2900.4856   | -0.0256 | -9    | 212        | 238      | ILDLGITGPEGHVLSRPEEVEAEAVNR |           |         |                         |

| Protein Name  | Accession No. | Peptide Count | Protein Score | Protein Score C.I.% | Total Ion Score | Total Ion C.I. % | Best Ion Score | Best Ion C.I.% | % Coverage |
|---------------|---------------|---------------|---------------|---------------------|-----------------|------------------|----------------|----------------|------------|
| Chaperonin 60 | gb AAC53362.1 | 13            | 145           | 100                 | 61              |                  | 99.982         | 45             | 99.356     |

| Peptide Information | Calc. Mass | Obsrv. Mass | ± da    | ± ppm | Start Seq. | End Seq. | Sequence          | Ion Score | C. I. % | Modification            |
|---------------------|------------|-------------|---------|-------|------------|----------|-------------------|-----------|---------|-------------------------|
|                     | 833.39     | 833.3374    | -0.0526 | -63   | 302        | 309      | APFGGDNR          |           |         |                         |
|                     | 833.39     | 833.3374    | -0.0526 | -63   | 302        | 309      | APFGGDNR          |           |         |                         |
|                     | 855.4682   | 855.4188    | -0.0494 | -58   | 134        | 141      | GANPVEIR          |           |         |                         |
|                     | 855.4682   | 855.4188    | -0.0494 | -58   | 134        | 141      | GANPVEIR          |           |         |                         |
|                     | 960.5109   | 960.476     | -0.0349 | -36   | 421        | 429      | VTDALNATR         |           |         |                         |
|                     | 960.5109   | 960.476     | -0.0349 | -36   | 421        | 429      | VTDALNATR         | 0         | 0       |                         |
|                     | 961.4849   | 961.4625    | -0.0224 | -23   | 302        | 310      | APFGGDNRK         |           |         |                         |
|                     | 1520.7512  | 1520.7368   | -0.0144 | -9    | 206        | 218      | TLNDELEIIEGMK     |           |         | Oxidation (M)[12]       |
|                     | 1520.7512  | 1520.7368   | -0.0144 | -9    | 206        | 218      | TLNDELEIIEGMK     |           |         | Oxidation (M)[12]       |
|                     | 1601.7516  | 1601.7375   | -0.0141 | -9    | 237        | 249      | CEFQDAYVLLSEK     |           |         | Carbamidomethyl (C)[1]  |
|                     | 1684.905   | 1684.9156   | 0.0106  | 6     | 430        | 446      | AAVEEGIVLGGGCALLR | 15        | 0       | Carbamidomethyl (C)[13] |
|                     | 1684.905   | 1684.9156   | 0.0106  | 6     | 430        | 446      | AAVEEGIVLGGGCALLR |           |         | Carbamidomethyl (C)[13] |
|                     | 1798.9004  | 1798.8853   | -0.0151 | -8    | 447        | 462      | CIPALDSLKPANEDQK  |           |         | Carbamidomethyl (C)[1]  |
|                     | 1798.9004  | 1798.8853   | -0.0151 | -8    | 447        | 462      | CIPALDSLKPANEDQK  |           |         | Carbamidomethyl (C)[1]  |

|           |           |         |     |     |     |          |                |    |        |                        |
|-----------|-----------|---------|-----|-----|-----|----------|----------------|----|--------|------------------------|
| 1905.0552 | 1905.0682 | 0.013   | 7   | 251 | 268 | ISSVQSI  | PALEIANAHR     | 45 | 99.356 |                        |
| 1905.0552 | 1905.0682 | 0.013   | 7   | 251 | 268 | ISSVQSI  | PALEIANAHR     |    |        |                        |
| 1922.9528 | 1922.9332 | -0.0196 | -10 | 206 | 221 | TLNDELEI | IEGGMKFDR      |    |        |                        |
| 1922.9528 | 1922.9332 | -0.0196 | -10 | 206 | 221 | TLNDELEI | IEGGMKFDR      |    |        |                        |
| 2040.002  | 2039.9945 | -0.0075 | -4  | 371 | 387 | IQEITEQL | DITTSEYEK      |    |        |                        |
| 2040.002  | 2039.9945 | -0.0075 | -4  | 371 | 387 | IQEITEQL | DITTSEYEK      |    |        |                        |
| 2365.3337 | 2365.3264 | -0.0073 | -3  | 269 | 290 | KPLVIIAE | DVDGEALSTLVNLR |    |        |                        |
| 2365.3337 | 2365.3264 | -0.0073 | -3  | 269 | 290 | KPLVIIAE | DVDGEALSTLVNLR |    |        |                        |
| 2565.3955 | 2565.1934 | -0.2021 | -79 | 447 | 469 | CIPALDSL | KPANEDQKIGIEIK |    |        | Carbamidomethyl (C)[1] |
| 2565.3955 | 2565.1934 | -0.2021 | -79 | 447 | 469 | CIPALDSL | KPANEDQKIGIEIK |    |        | Carbamidomethyl (C)[1] |

| Protein Name                              | Accession No. | Peptide Count | Protein Score | Protein Score |          | Total Ion Score | Total Ion C.I. %   | Best Ion Score | Best Ion C.I. % | % Coverage             |      |
|-------------------------------------------|---------------|---------------|---------------|---------------|----------|-----------------|--------------------|----------------|-----------------|------------------------|------|
|                                           |               |               |               | C.I. %        |          |                 |                    |                |                 |                        |      |
| ATPase, H transporting, lysosomal V1 subu | gil16758754   | 10            | 123           | 100           |          | 44              |                    | 99.17          | 21              | 0                      | 27.2 |
| Peptide Information                       |               |               |               |               |          |                 |                    |                |                 |                        |      |
| Calc. Mass                                | Obsrv. Mass   | ± da          | ± ppm         | Start Seq.    | End Seq. | Sequence        |                    | Ion Score      | C. I. %         | Modification           |      |
| 877.4526                                  | 877.4891      | 0.0365        | 42            | 38            | 44       | NYLSQPR         |                    | 9              | 0               |                        |      |
| 877.4526                                  | 877.4891      | 0.0365        | 42            | 38            | 44       | NYLSQPR         |                    |                |                 |                        |      |
| 1189.6323                                 | 1189.6149     | -0.0174       | -15           | 131           | 141      | VFNGSGK         | PIDR               |                |                 |                        |      |
| 1338.6437                                 | 1338.6146     | -0.0291       | -22           | 461           | 471      | NFITQGP         | YENR               |                |                 |                        |      |
| 1338.6437                                 | 1338.6146     | -0.0291       | -22           | 461           | 471      | NFITQGP         | YENR               | 21             | 0               |                        |      |
| 1437.7373                                 | 1437.698      | -0.0393       | -27           | 495           | 506      | IPQSTLS         | EFYPR              |                |                 |                        |      |
| 1437.7373                                 | 1437.698      | -0.0393       | -27           | 495           | 506      | IPQSTLS         | EFYPR              | 14             | 0               |                        |      |
| 1520.7954                                 | 1520.7367     | -0.0587       | -39           | 94            | 108      | AVVQVF          | EFTSGIDAK          |                |                 |                        |      |
| 1593.8384                                 | 1593.7827     | -0.0557       | -35           | 494           | 506      | RIPQSTL         | SEFYPR             |                |                 |                        |      |
| 1596.9108                                 | 1596.8643     | -0.0465       | -29           | 387           | 400      | QIYPPIN         | VLPSLSR            |                |                 |                        |      |
| 1596.9108                                 | 1596.8643     | -0.0465       | -29           | 387           | 400      | QIYPPIN         | VLPSLSR            |                |                 |                        |      |
| 2048.0593                                 | 2048.0225     | -0.0368       | -18           | 8             | 29       | GIVNGAA         | PELVPVTGGPMAGAR    |                |                 | Oxidation (M)[18]      |      |
| 2384.1221                                 | 2383.9829     | -0.1392       | -58           | 110           | 130      | TSCEFTG         | DILRTPVSEDM LGR    |                |                 | Carbamidomethyl (C)[3] |      |
| 2722.3538                                 | 2722.405      | 0.0512        | 19            | 164           | 188      | IYPEEMI         | QTGISAIDGMNSIARGQK |                |                 |                        |      |

| Protein Name        | Accession No. | Peptide Count | Protein Score | Protein Score |          | Total Ion Score | Total Ion C.I. % | Best Ion Score | Best Ion C.I. % | % Coverage              |      |
|---------------------|---------------|---------------|---------------|---------------|----------|-----------------|------------------|----------------|-----------------|-------------------------|------|
|                     |               |               |               | C.I. %        |          |                 |                  |                |                 |                         |      |
| Alpha enolase       | spt P04764    | 15            | 244           | 100           |          | 111             |                  | 100            | 48              | 99.486                  | 41.0 |
| Peptide Information |               |               |               |               |          |                 |                  |                |                 |                         |      |
| Calc. Mass          | Obsrv. Mass   | ± da          | ± ppm         | Start Seq.    | End Seq. | Sequence        |                  | Ion Score      | C. I. %         | Modification            |      |
| 800.3824            | 800.3577      | -0.0247       | -31           | 256           | 261      | YDLDFK          |                  |                |                 |                         |      |
| 800.3824            | 800.3577      | -0.0247       | -31           | 256           | 261      | YDLDFK          |                  |                |                 |                         |      |
| 806.4518            | 806.4189      | -0.0329       | -41           | 406           | 411      | YNQILR          |                  | 36             | 91.793          |                         |      |
| 806.4518            | 806.4189      | -0.0329       | -41           | 406           | 411      | YNQILR          |                  |                |                 |                         |      |
| 810.4468            | 810.4134      | -0.0334       | -41           | 64            | 70       | AVEHINK         |                  |                |                 |                         |      |
| 840.4474            | 840.4634      | 0.016         | 19            | 422           | 428      | FAGRSFR         |                  |                |                 |                         |      |
| 1086.6154           | 1086.6071     | -0.0083       | -8            | 80            | 88       | KLNVVEQ         | EK               |                |                 |                         |      |
| 1086.6154           | 1086.6071     | -0.0083       | -8            | 80            | 88       | KLNVVEQ         | EK               |                |                 |                         |      |
| 1143.6156           | 1143.6096     | -0.006        | -5            | 183           | 192      | IGAEVYH         | NLK              | 48             | 99.486          |                         |      |
| 1143.6156           | 1143.6096     | -0.006        | -5            | 183           | 192      | IGAEVYH         | NLK              |                |                 |                         |      |
| 1406.7162           | 1406.719      | 0.0028        | 2             | 15            | 27       | GNPTVE          | VDLYTAK          |                |                 |                         |      |
| 1406.7162           | 1406.719      | 0.0028        | 2             | 15            | 27       | GNPTVE          | VDLYTAK          |                |                 |                         |      |
| 1439.7417           | 1439.7416     | -0.0001       | 0             | 269           | 280      | YITPDQL         | ADLYK            |                |                 |                         |      |
| 1439.7417           | 1439.7416     | -0.0001       | 0             | 269           | 280      | YITPDQL         | ADLYK            |                |                 |                         |      |
| 1633.8214           | 1633.8226     | 0.0012        | 1             | 343           | 357      | VNIGSV          | TESLQACK         |                |                 | Carbamidomethyl (C)[14] |      |
| 1633.8214           | 1633.8226     | 0.0012        | 1             | 343           | 357      | VNIGSV          | TESLQACK         |                |                 | Carbamidomethyl (C)[14] |      |
| 1668.7455           | 1668.7473     | 0.0018        | 1             | 89            | 102      | IDQLMI          | EMDGTENK         |                |                 | Oxidation (M)[5,8]      |      |
| 1668.7455           | 1668.7473     | 0.0018        | 1             | 89            | 102      | IDQLMI          | EMDGTENK         |                |                 | Oxidation (M)[5,8]      |      |
| 1804.9438           | 1804.9647     | 0.0209        | 12            | 32            | 49       | AAVPSG          | ASTGIYEALER      |                |                 |                         |      |
| 1804.9438           | 1804.9647     | 0.0209        | 12            | 32            | 49       | AAVPSG          | ASTGIYEALER      | 28             | 48.454          |                         |      |
| 1928.9608           | 1928.9664     | 0.0056        | 3             | 162           | 178      | LAMQEF          | MILPVGASSFR      |                |                 | Oxidation (M)[3,7]      |      |
| 1928.9608           | 1928.9664     | 0.0056        | 3             | 162           | 178      | LAMQEF          | MILPVGASSFR      |                |                 | Oxidation (M)[3,7]      |      |

|           |           |         |      |     |                           |                   |
|-----------|-----------|---------|------|-----|---------------------------|-------------------|
| 2047.0706 | 2047.0695 | -0.0011 | -1   | 306 | 325 FTATAGIQVVGDDLTVTNPK  |                   |
| 2208.0278 | 2208.0249 | -0.0029 | -1   | 233 | 252 AGYTDQVVIGMDVAASEFYR  | Oxidation (M)[11] |
| 2208.0278 | 2208.0249 | -0.0029 | -1   | 233 | 252 AGYTDQVVIGMDVAASEFYR  | Oxidation (M)[11] |
| 2384.1924 | 2383.9441 | -0.2483 | -104 | 162 | 182 LAMQEFMILPVGASSFREAMR |                   |
| 2384.1924 | 2383.9441 | -0.2483 | -104 | 162 | 182 LAMQEFMILPVGASSFREAMR |                   |

| Protein Name              | Accession No. | Peptide Count | Protein Score | Protein Score C.I.% | Total Ion Score | Total Ion C.I. %      | Best Ion Score | Best Ion C.I.% | % Coverage           |      |
|---------------------------|---------------|---------------|---------------|---------------------|-----------------|-----------------------|----------------|----------------|----------------------|------|
| ATP synthase beta subunit | gb AAB02288.1 | 12            | 348           | 100                 | 265             |                       | 100            | 62             | 99.98                | 30.8 |
| Peptide Information       |               |               |               |                     |                 |                       |                |                |                      |      |
| Calc. Mass                | Obsrv. Mass   | ± da          | ± ppm         | Start Seq.          | End Seq.        | Sequence              | Ion Score      | C. I. %        | Modification         |      |
| 899.5196                  | 899.4961      | -0.0235       | -26           | 71                  | 79              | VLD SGAPIK            | 24             | 0              |                      |      |
| 899.5196                  | 899.4961      | -0.0235       | -26           | 71                  | 79              | VLD SGAPIK            |                |                |                      |      |
| 975.5621                  | 975.5485      | -0.0136       | -14           | 148                 | 158             | IGLFGGAGVGK           |                |                |                      |      |
| 975.5621                  | 975.5485      | -0.0136       | -14           | 148                 | 158             | IGLFGGAGVGK           | 16             | 0              |                      |      |
| 1038.5942                 | 1038.5953     | 0.0011        | 1             | 80                  | 89              | IPVGPETLGR            | 62             | 99.978         |                      |      |
| 1038.5942                 | 1038.5953     | 0.0011        | 1             | 80                  | 89              | IPVGPETLGR            |                |                |                      |      |
| 1088.635                  | 1088.6204     | -0.0146       | -13           | 135                 | 144             | VVDLLAPYAK            |                |                |                      |      |
| 1088.635                  | 1088.6204     | -0.0146       | -13           | 135                 | 144             | VVDLLAPYAK            |                |                |                      |      |
| 1278.6359                 | 1278.6464     | 0.0105        | 8             | 56                  | 67              | TIAMDGTGLVR           | 23             | 0              | Oxidation (M)[4]     |      |
| 1278.6359                 | 1278.6464     | 0.0105        | 8             | 56                  | 67              | TIAMDGTGLVR           |                |                | Oxidation (M)[4]     |      |
| 1401.7042                 | 1401.7222     | 0.018         | 13            | 90                  | 101             | IMNVIGEPIDER          | 22             | 0              | Oxidation (M)[2]     |      |
| 1401.7042                 | 1401.7222     | 0.018         | 13            | 90                  | 101             | IMNVIGEPIDER          |                |                | Oxidation (M)[2]     |      |
| 1435.7539                 | 1435.7854     | 0.0315        | 22            | 257                 | 270             | FTQAGSEVSALLGR        | 14             | 0              |                      |      |
| 1435.7539                 | 1435.7854     | 0.0315        | 22            | 257                 | 270             | FTQAGSEVSALLGR        |                |                |                      |      |
| 1601.8104                 | 1601.8553     | 0.0449        | 28            | 211                 | 225             | VALVYQQMNEPPGAR       | 25             | 0              |                      |      |
| 1601.8104                 | 1601.8553     | 0.0449        | 28            | 211                 | 225             | VALVYQQMNEPPGAR       |                |                |                      |      |
| 1617.8053                 | 1617.845      | 0.0397        | 25            | 211                 | 225             | VALVYQQMNEPPGAR       |                |                | Oxidation (M)[8]     |      |
| 1617.8053                 | 1617.845      | 0.0397        | 25            | 211                 | 225             | VALVYQQMNEPPGAR       | 49             | 99.454         | Oxidation (M)[8]     |      |
| 1650.9174                 | 1650.9677     | 0.0503        | 30            | 41                  | 55              | LVLEVAQHLGESTVR       | 0              | 0              |                      |      |
| 1650.9174                 | 1650.9677     | 0.0503        | 30            | 41                  | 55              | LVLEVAQHLGESTVR       |                |                |                      |      |
| 1815.8694                 | 1815.928      | 0.0586        | 32            | 353                 | 368             | IMDPNIVGSEHYDVAR      |                |                |                      |      |
| 1831.8643                 | 1831.921      | 0.0567        | 31            | 353                 | 368             | IMDPNIVGSEHYDVAR      |                |                | Oxidation (M)[2]     |      |
| 1831.8643                 | 1831.921      | 0.0567        | 31            | 353                 | 368             | IMDPNIVGSEHYDVAR      | 39             | 94.841         | Oxidation (M)[2]     |      |
| 2076.9905                 | 2077.0637     | 0.0732        | 35            | 188                 | 205             | EGNDLYHEMIESGVINLK    |                |                | Oxidation (M)[9]     |      |
| 2076.9905                 | 2077.0637     | 0.0732        | 35            | 188                 | 205             | EGNDLYHEMIESGVINLK    |                |                | Oxidation (M)[9]     |      |
| 2282.0791                 | 2282.1812     | 0.1021        | 45            | 271                 | 291             | IPSAVGYQPTLATDMGTMQER | 5              | 0              | Oxidation (M)[15]    |      |
| 2282.0791                 | 2282.1812     | 0.1021        | 45            | 271                 | 291             | IPSAVGYQPTLATDMGTMQER |                |                | Oxidation (M)[15]    |      |
| 2298.074                  | 2298.1733     | 0.0993        | 43            | 271                 | 291             | IPSAVGYQPTLATDMGTMQER | 16             | 0              | Oxidation (M)[15,18] |      |
| 2298.074                  | 2298.1733     | 0.0993        | 43            | 271                 | 291             | IPSAVGYQPTLATDMGTMQER |                |                | Oxidation (M)[15,18] |      |

| Protein Name              | Accession No. | Peptide Count | Protein Score | Protein Score C.I.% | Total Ion Score | Total Ion C.I. % | Best Ion Score | Best Ion C.I.% | % Coverage       |      |
|---------------------------|---------------|---------------|---------------|---------------------|-----------------|------------------|----------------|----------------|------------------|------|
| ATP synthase beta subunit | gb AAB02288.1 | 14            | 508           | 100                 | 408             |                  | 100            | 77             | 100              | 36.9 |
| Peptide Information       |               |               |               |                     |                 |                  |                |                |                  |      |
| Calc. Mass                | Obsrv. Mass   | ± da          | ± ppm         | Start Seq.          | End Seq.        | Sequence         | Ion Score      | C. I. %        | Modification     |      |
| 899.5196                  | 899.5611      | 0.0415        | 46            | 71                  | 79              | VLD SGAPIK       |                |                |                  |      |
| 899.5196                  | 899.5611      | 0.0415        | 46            | 71                  | 79              | VLD SGAPIK       | 31             | 83.097         |                  |      |
| 975.5621                  | 975.6062      | 0.0441        | 45            | 148                 | 158             | IGLFGGAGVGK      | 53             | 99.893         |                  |      |
| 975.5621                  | 975.6062      | 0.0441        | 45            | 148                 | 158             | IGLFGGAGVGK      |                |                |                  |      |
| 1038.5942                 | 1038.6564     | 0.0622        | 60            | 80                  | 89              | IPVGPETLGR       | 77             | 100            |                  |      |
| 1038.5942                 | 1038.6564     | 0.0622        | 60            | 80                  | 89              | IPVGPETLGR       |                |                |                  |      |
| 1088.635                  | 1088.676      | 0.041         | 38            | 135                 | 144             | VVDLLAPYAK       |                |                |                  |      |
| 1088.635                  | 1088.676      | 0.041         | 38            | 135                 | 144             | VVDLLAPYAK       | 41             | 98.023         |                  |      |
| 1262.6409                 | 1262.7006     | 0.0597        | 47            | 56                  | 67              | TIAMDGTGLVR      | 21             | 0              |                  |      |
| 1262.6409                 | 1262.7006     | 0.0597        | 47            | 56                  | 67              | TIAMDGTGLVR      |                |                |                  |      |
| 1278.6359                 | 1278.6913     | 0.0554        | 43            | 56                  | 67              | TIAMDGTGLVR      |                |                | Oxidation (M)[4] |      |
| 1278.6359                 | 1278.6913     | 0.0554        | 43            | 56                  | 67              | TIAMDGTGLVR      | 34             | 91.928         | Oxidation (M)[4] |      |

|           |           |        |    |     |     |                       |    |        |                      |  |  |
|-----------|-----------|--------|----|-----|-----|-----------------------|----|--------|----------------------|--|--|
| 1385.7094 | 1385.7738 | 0.0644 | 46 | 90  | 101 | IMNVIGEPIDER          |    |        |                      |  |  |
| 1401.7042 | 1401.7615 | 0.0573 | 41 | 90  | 101 | IMNVIGEPIDER          | 19 | 0      | Oxidation (M)[2]     |  |  |
| 1401.7042 | 1401.7615 | 0.0573 | 41 | 90  | 101 | IMNVIGEPIDER          |    |        | Oxidation (M)[2]     |  |  |
| 1435.7539 | 1435.8254 | 0.0715 | 50 | 257 | 270 | FTQAGSEVSALLGR        |    |        |                      |  |  |
| 1435.7539 | 1435.8254 | 0.0715 | 50 | 257 | 270 | FTQAGSEVSALLGR        | 28 | 60.193 |                      |  |  |
| 1439.7893 | 1439.8452 | 0.0559 | 39 | 228 | 240 | VALTGLTVAEYFR         |    |        |                      |  |  |
| 1439.7893 | 1439.8452 | 0.0559 | 39 | 228 | 240 | VALTGLTVAEYFR         |    |        |                      |  |  |
| 1601.8104 | 1601.8856 | 0.0752 | 47 | 211 | 225 | VALVYGMNEPPGAR        |    |        |                      |  |  |
| 1601.8104 | 1601.8856 | 0.0752 | 47 | 211 | 225 | VALVYGMNEPPGAR        | 35 | 92.536 |                      |  |  |
| 1617.8053 | 1617.8741 | 0.0688 | 43 | 211 | 225 | VALVYGMNEPPGAR        |    |        | Oxidation (M)[8]     |  |  |
| 1617.8053 | 1617.8741 | 0.0688 | 43 | 211 | 225 | VALVYGMNEPPGAR        | 40 | 97.667 | Oxidation (M)[8]     |  |  |
| 1650.9174 | 1650.9932 | 0.0758 | 46 | 41  | 55  | LVLEVAQHLGESTVR       | 13 | 0      |                      |  |  |
| 1650.9174 | 1650.9932 | 0.0758 | 46 | 41  | 55  | LVLEVAQHLGESTVR       |    |        |                      |  |  |
| 1815.8694 | 1815.9465 | 0.0771 | 42 | 353 | 368 | IMDPNIVGSEHYDVAR      |    |        |                      |  |  |
| 1831.8643 | 1831.9375 | 0.0732 | 40 | 353 | 368 | IMDPNIVGSEHYDVAR      |    |        | Oxidation (M)[2]     |  |  |
| 1831.8643 | 1831.9375 | 0.0732 | 40 | 353 | 368 | IMDPNIVGSEHYDVAR      | 41 | 98.386 | Oxidation (M)[2]     |  |  |
| 1988.0334 | 1988.1144 | 0.081  | 41 | 334 | 352 | AIAELGIYPAVDPLDSTSR   |    |        |                      |  |  |
| 1988.0334 | 1988.1144 | 0.081  | 41 | 334 | 352 | AIAELGIYPAVDPLDSTSR   | 18 | 0      |                      |  |  |
| 2076.9905 | 2077.0706 | 0.0801 | 39 | 188 | 205 | EGNDLYHEMIESGVINLK    |    |        | Oxidation (M)[9]     |  |  |
| 2076.9905 | 2077.0706 | 0.0801 | 39 | 188 | 205 | EGNDLYHEMIESGVINLK    |    |        | Oxidation (M)[9]     |  |  |
| 2282.0791 | 2282.178  | 0.0989 | 43 | 271 | 291 | IPSAVGYQPTLATDMGTMQER |    |        | Oxidation (M)[15]    |  |  |
| 2282.0791 | 2282.178  | 0.0989 | 43 | 271 | 291 | IPSAVGYQPTLATDMGTMQER | 7  | 0      | Oxidation (M)[15]    |  |  |
| 2298.074  | 2298.1699 | 0.0959 | 42 | 271 | 291 | IPSAVGYQPTLATDMGTMQER |    |        | Oxidation (M)[15,18] |  |  |
| 2298.074  | 2298.1699 | 0.0959 | 42 | 271 | 291 | IPSAVGYQPTLATDMGT     | 13 | 0      | Oxidation (M)[15,18] |  |  |

| Protein Name                                | Accession No.  | Peptide Count | Protein Score | Protein Score C.I.% | Total Ion Score | Total Ion C.I. % | Best Ion Score | Best Ion C.I.% | % Coverage |      |
|---------------------------------------------|----------------|---------------|---------------|---------------------|-----------------|------------------|----------------|----------------|------------|------|
| Similar to ubiquinol-cytochrome c reductase | rfjXP_217267.2 | 12            | 207           | 100                 | 110             |                  | 100            | 30             | 71.047     | 27.5 |

| Peptide Information | Calc. Mass | Obsrv. Mass | ± da    | ± ppm | Start Seq. | End Seq. | Sequence            | Ion Score | C. I. % | Modification            |
|---------------------|------------|-------------|---------|-------|------------|----------|---------------------|-----------|---------|-------------------------|
|                     | 809.4151   | 809.3976    | -0.0175 | -22   | 270        | 276      | FTGSEIR             |           |         |                         |
|                     | 809.4515   | 809.3976    | -0.0539 | -67   | 416        | 422      | SLLTYGR             | 19        | 0       |                         |
|                     | 900.5261   | 900.4976    | -0.0285 | -32   | 164        | 170      | ERDVILR             |           |         |                         |
|                     | 998.5377   | 998.5308    | -0.0069 | -7    | 103        | 111      | NRPGNALEK           |           |         |                         |
|                     | 998.5377   | 998.5308    | -0.0069 | -7    | 103        | 111      | NRPGNALEK           | 16        | 0       |                         |
|                     | 1083.5317  | 1083.5312   | -0.0005 | 0     | 214        | 222      | TDLTDYLSR           |           |         |                         |
|                     | 1083.5317  | 1083.5312   | -0.0005 | 0     | 214        | 222      | TDLTDYLSR           | 30        | 71.047  |                         |
|                     | 1205.583   | 1205.5842   | 0.0012  | 1     | 433        | 442      | IEEVDAQMVR          |           |         | Oxidation (M)[8]        |
|                     | 1205.583   | 1205.5842   | 0.0012  | 1     | 433        | 442      | IEEVDAQMVR          | 27        | 41.832  | Oxidation (M)[8]        |
|                     | 1256.6746  | 1256.6409   | -0.0337 | -27   | 423        | 432      | RIPLAEWESR          |           |         |                         |
|                     | 1256.7144  | 1256.6409   | -0.0735 | -58   | 226        | 238      | APRMVLAAGGVK        |           |         | Oxidation (M)[4]        |
|                     | 1353.6315  | 1353.6486   | 0.0171  | 13    | 379        | 390      | LCTSATESEVTR        |           |         | Carbamidomethyl (C)[2]  |
|                     | 1580.7855  | 1580.7921   | 0.0066  | 4     | 86         | 99       | NNGAGYFLEHLAFK      |           |         |                         |
|                     | 1646.8132  | 1646.8392   | 0.026   | 16    | 112        | 126      | EVESIGAHLNAYSTR     | 19        | 0       |                         |
|                     | 1646.8132  | 1646.8392   | 0.026   | 16    | 112        | 126      | EVESIGAHLNAYSTR     |           |         |                         |
|                     | 2068.0127  | 2068.0288   | 0.0161  | 8     | 397        | 415      | NALISHLDGTTPCVEDIGR |           |         | Carbamidomethyl (C)[14] |

| Protein Name    | Accession No. | Peptide Count | Protein Score | Protein Score C.I.% | Total Ion Score | Total Ion C.I. % | Best Ion Score | Best Ion C.I.% | % Coverage |      |
|-----------------|---------------|---------------|---------------|---------------------|-----------------|------------------|----------------|----------------|------------|------|
| Creatine kinase | gbjAAA40932.1 | 7             | 98            | 100                 | 40              |                  | 98.707         | 24             | 51.968     | 30.7 |

| Peptide Information | Calc. Mass | Obsrv. Mass | ± da    | ± ppm | Start Seq. | End Seq. | Sequence          | Ion Score | C. I. % | Modification |
|---------------------|------------|-------------|---------|-------|------------|----------|-------------------|-----------|---------|--------------|
|                     | 1232.6157  | 1232.5919   | -0.0238 | -19   | 87         | 96       | DLFDPIIEDR        |           |         |              |
|                     | 1232.6157  | 1232.5919   | -0.0238 | -19   | 87         | 96       | DLFDPIIEDR        | 11        | 0       |              |
|                     | 1290.5896  | 1290.6183   | 0.0287  | 22    | 1          | 11       | MPFSNSHNTQK       |           |         |              |
|                     | 1303.7256  | 1303.7172   | -0.0084 | -6    | 33         | 43       | VLTPELYAELR       | 9         | 0       |              |
|                     | 1303.7256  | 1303.7172   | -0.0084 | -6    | 33         | 43       | VLTPELYAELR       |           |         |              |
|                     | 1602.8334  | 1602.839    | 0.0056  | 3     | 157        | 172      | LAVEALSSLDGDLISGR | 24        | 51.968  |              |

|           |           |         |     |     |     |                          |   |  |   |                         |
|-----------|-----------|---------|-----|-----|-----|--------------------------|---|--|---|-------------------------|
| 1602.8334 | 1602.839  | 0.0056  | 3   | 157 | 172 | LAVEALSSLDGDLGR          |   |  |   |                         |
| 1964.9308 | 1964.9399 | 0.0091  | 5   | 321 | 341 | GTGGVDTAAVGGVFDVSNADR    |   |  |   |                         |
| 1964.9308 | 1964.9399 | 0.0091  | 5   | 321 | 341 | GTGGVDTAAVGGVFDVSNADR    | 7 |  | 0 |                         |
| 2518.1692 | 2518.1384 | -0.0308 | -12 | 108 | 130 | TDLNPDNLQGGDDLDPNYVLSSR  |   |  |   |                         |
| 2953.4124 | 2953.2546 | -0.1578 | -53 | 268 | 292 | NYEFMWNPHLGYILTCPSNLGTLR |   |  |   | Carbamidomethyl (C)[16] |

| Protein Name                                | Accession No. | Peptide Count | Protein Score | Protein Score C.I.% | Total Ion Score | Total Ion C.I. % | Best Ion Score | Best Ion C.I.% | % Coverage |      |
|---------------------------------------------|---------------|---------------|---------------|---------------------|-----------------|------------------|----------------|----------------|------------|------|
| Guanine nucleotide binding protein, alpha o | cra CP51914   | 7             | 96            | 100                 | 47              |                  | 99.547         | 35             | 92.279     | 22.9 |

| Peptide Information | Calc. Mass | Obsrv. Mass | ± da    | ± ppm | Start Seq. | End Seq. | Sequence            | Ion Score | C. I. % | Modification     |
|---------------------|------------|-------------|---------|-------|------------|----------|---------------------|-----------|---------|------------------|
|                     | 891.4682   | 891.4868    | 0.0186  | 21    | 155        | 162      | LFDVGGQR            | 12        | 0       |                  |
|                     | 891.4682   | 891.4868    | 0.0186  | 21    | 155        | 162      | LFDVGGQR            |           |         |                  |
|                     | 1298.5933  | 1298.6516   | 0.0583  | 45    | 43         | 54       | AMDTLGVEYGDK        |           |         |                  |
|                     | 1298.5933  | 1298.6516   | 0.0583  | 45    | 43         | 54       | AMDTLGVEYGDK        |           |         |                  |
|                     | 1380.7158  | 1380.7291   | 0.0133  | 10    | 138        | 149      | TTGIVETHFTFK        |           |         |                  |
|                     | 1380.7158  | 1380.7291   | 0.0133  | 10    | 138        | 149      | TTGIVETHFTFK        |           |         |                  |
|                     | 1445.6907  | 1445.7073   | 0.0166  | 11    | 11         | 23       | IIHEDGFSGEDVK       |           |         |                  |
|                     | 1445.6907  | 1445.7073   | 0.0166  | 11    | 11         | 23       | IIHEDGFSGEDVK       |           |         |                  |
|                     | 1599.7319  | 1599.7345   | 0.0026  | 2     | 43         | 56       | AMDTLGVEYGDKER      |           |         | Oxidation (M)[2] |
|                     | 1689.8442  | 1689.8634   | 0.0192  | 11    | 119        | 133      | IGAADYQPTQDILR      |           |         |                  |
|                     | 1689.8442  | 1689.8634   | 0.0192  | 11    | 119        | 133      | IGAADYQPTQDILR      | 35        | 92.279  |                  |
|                     | 2150.1968  | 2150.1899   | -0.0069 | -3    | 24         | 42       | QYKPVVYSNTIQSLAAIVR |           |         |                  |

| Protein Name                            | Accession No. | Peptide Count | Protein Score | Protein Score C.I.% | Total Ion Score | Total Ion C.I. % | Best Ion Score | Best Ion C.I.% | % Coverage |      |
|-----------------------------------------|---------------|---------------|---------------|---------------------|-----------------|------------------|----------------|----------------|------------|------|
| Similar to capping protein beta subunit | rf XP_21656.2 | 10            | 172           | 100                 | 76              |                  | 100            | 28             | 47.31      | 41.2 |

| Peptide Information | Calc. Mass | Obsrv. Mass | ± da    | ± ppm | Start Seq. | End Seq. | Sequence           | Ion Score | C. I. % | Modification            |
|---------------------|------------|-------------|---------|-------|------------|----------|--------------------|-----------|---------|-------------------------|
|                     | 1057.6     | 1057.5259   | -0.0741 | -70   | 260        | 268      | NDLVEALKR          |           |         |                         |
|                     | 1057.6     | 1057.5259   | -0.0741 | -70   | 260        | 268      | NDLVEALKR          |           |         |                         |
|                     | 1108.6473  | 1108.589    | -0.0583 | -53   | 15         | 23       | RLPPQIEK           |           |         |                         |
|                     | 1108.6473  | 1108.589    | -0.0583 | -53   | 15         | 23       | RLPPQIEK           | 14        | 0       |                         |
|                     | 1171.5994  | 1171.536    | -0.0634 | -54   | 226        | 235      | STLNEIYFGK         |           |         |                         |
|                     | 1231.5413  | 1231.5054   | -0.0359 | -29   | 58         | 66       | DYLLCDYNR          |           |         | Carbamidomethyl (C)[5]  |
|                     | 1231.5413  | 1231.5054   | -0.0359 | -29   | 58         | 66       | DYLLCDYNR          | 28        | 47.309  | Carbamidomethyl (C)[5]  |
|                     | 1353.6427  | 1353.6108   | -0.0319 | -24   | 182        | 195      | SGSGTMNLGGSLTR     |           |         | Oxidation (M)[6]        |
|                     | 1353.6427  | 1353.6108   | -0.0319 | -24   | 182        | 195      | SGSGTMNLGGSLTR     |           |         | Oxidation (M)[6]        |
|                     | 1534.6842  | 1534.6639   | -0.0203 | -13   | 79         | 92       | YDPPLEDGAMPSAR     |           |         | Oxidation (M)[10]       |
|                     | 1550.8247  | 1550.6805   | -0.1442 | -93   | 169        | 181      | LTSTVMLWLQTNK      |           |         | Oxidation (M)[6]        |
|                     | 1568.7339  | 1568.7338   | -0.0001 | 0     | 96         | 108      | LEVEANNAFDQYR      |           |         |                         |
|                     | 1568.7339  | 1568.7338   | -0.0001 | 0     | 96         | 108      | LEVEANNAFDQYR      | 12        | 0       |                         |
|                     | 1696.8289  | 1696.8372   | 0.0083  | 5     | 95         | 108      | KLEVEANNAFDQYR     | 22        | 0       |                         |
|                     | 1696.8289  | 1696.8372   | 0.0083  | 5     | 95         | 108      | KLEVEANNAFDQYR     |           |         |                         |
|                     | 2303.0391  | 2303.0471   | 0.008   | 3     | 196        | 215      | QMEKDETVSDCSPHIANI |           |         | Carbamidomethyl (C)[11] |

| Protein Name     | Accession No.  | Peptide Count | Protein Score | Protein Score C.I.% | Total Ion Score | Total Ion C.I. % | Best Ion Score | Best Ion C.I.% | % Coverage |      |
|------------------|----------------|---------------|---------------|---------------------|-----------------|------------------|----------------|----------------|------------|------|
| Similar to HT014 | rf XP_216543.2 | 8             | 89            | 99.996              | 24              |                  | 26.006         | 24             | 26.006     | 22.7 |

| Peptide Information | Calc. Mass | Obsrv. Mass | ± da    | ± ppm | Start Seq. | End Seq. | Sequence   | Ion Score | C. I. % | Modification |
|---------------------|------------|-------------|---------|-------|------------|----------|------------|-----------|---------|--------------|
|                     | 881.5243   | 881.5007    | -0.0236 | -27   | 210        | 216      | IFYIGLR    |           |         |              |
|                     | 881.5243   | 881.5007    | -0.0236 | -27   | 210        | 216      | IFYIGLR    |           |         |              |
|                     | 884.4108   | 884.3918    | -0.019  | -21   | 62         | 68       | EEPPEQR    |           |         |              |
|                     | 884.4108   | 884.3918    | -0.019  | -21   | 62         | 68       | EEPPEQR    | 24        | 26.006  |              |
|                     | 1025.5779  | 1025.574    | -0.0039 | -4    | 69         | 77       | GLAYGLYLR  |           |         |              |
|                     | 1025.5779  | 1025.574    | -0.0039 | -4    | 69         | 77       | GLAYGLYLR  | 4         | 0       |              |
|                     | 1206.575   | 1206.6005   | 0.0255  | 21    | 165        | 174      | EPDQTFSLNR |           |         |              |

|           |           |         |     |     |                            |                     |
|-----------|-----------|---------|-----|-----|----------------------------|---------------------|
| 1468.6373 | 1468.6478 | 0.0105  | 7   | 153 | 164 NIPQMSFDDTER           | Oxidation (M)[5]    |
| 1468.6373 | 1468.6478 | 0.0105  | 7   | 153 | 164 NIPQMSFDDTER           | Oxidation (M)[5]    |
| 1544.822  | 1544.8287 | 0.0067  | 4   | 189 | 201 FSNVYHLHSISK           |                     |
| 1933.8267 | 1933.8235 | -0.0032 | -2  | 133 | 149 GIIIMGEDDDSHPSSEMR     | Oxidation (M)[5,16] |
| 1933.8267 | 1933.8235 | -0.0032 | -2  | 133 | 149 GIIIMGEDDDSHPSSEMR     | Oxidation (M)[5,16] |
| 2656.1943 | 2656.147  | -0.0473 | -18 | 153 | 174 NIPQMSFDDTEREPDQTFSLNR | Oxidation (M)[5]    |

| Protein Name                                               | Accession No. | Peptide Count | Protein Score | Protein Score C.I.% | Total Ion Score | Total Ion C.I. % | Best Ion Score | Best Ion C.I.% | % Coverage |      |
|------------------------------------------------------------|---------------|---------------|---------------|---------------------|-----------------|------------------|----------------|----------------|------------|------|
| Phosphatidylethanolamine-binding protein (Frf) NP_058932.1 |               | 5             | 211           | 100                 | 169             |                  | 100            | 84             | 100        | 29.4 |

| Peptide Information | Calc. Mass | Obsrv. Mass | ± da    | ± ppm | Start Seq. | End Seq. | Sequence            | Ion Score | C. I. % | Modification |
|---------------------|------------|-------------|---------|-------|------------|----------|---------------------|-----------|---------|--------------|
|                     | 912.4937   | 912.4659    | -0.0278 | -30   | 149        | 155      | FKVESFR             |           |         |              |
|                     | 912.4937   | 912.4659    | -0.0278 | -30   | 149        | 155      | FKVESFR             | 30        | 85.471  |              |
|                     | 1351.674   | 1351.6658   | -0.0082 | -6    | 27         | 39       | VDYGGVTVDDELGK      |           |         |              |
|                     | 1560.8268  | 1560.8411   | 0.0143  | 9     | 63         | 76       | LYTLVLTDPDAPSR      |           |         |              |
|                     | 1560.8268  | 1560.8411   | 0.0143  | 9     | 63         | 76       | LYTLVLTDPDAPSR      | 56        | 99.964  |              |
|                     | 1688.9218  | 1688.9341   | 0.0123  | 7     | 63         | 77       | LYTLVLTDPDAPSRK     |           |         |              |
|                     | 1963.9607  | 1963.9636   | 0.0029  | 1     | 94         | 113      | GNDISSGTVLSEYVGSPPK | 84        | 100     |              |
|                     | 1963.9607  | 1963.9636   | 0.0029  | 1     | 94         | 113      | GNDISSGTVLSEYVGSPPK |           |         |              |

| Protein Name                                             | Accession No. | Peptide Count | Protein Score | Protein Score C.I.% | Total Ion Score | Total Ion C.I. % | Best Ion Score | Best Ion C.I.% | % Coverage |      |
|----------------------------------------------------------|---------------|---------------|---------------|---------------------|-----------------|------------------|----------------|----------------|------------|------|
| Similar to NADH dehydrogenase:ubiquinone frf XP_215197.1 |               | 6             | 90            | 99.997              | 29              |                  | 60.737         | 15             | 0          | 12.3 |

| Peptide Information | Calc. Mass | Obsrv. Mass | ± da    | ± ppm | Start Seq. | End Seq. | Sequence    | Ion Score | C. I. % | Modification     |
|---------------------|------------|-------------|---------|-------|------------|----------|-------------|-----------|---------|------------------|
|                     | 837.3737   | 837.3371    | -0.0366 | -44   | 106        | 112      | YPSGEER     |           |         |                  |
|                     | 837.3737   | 837.3371    | -0.0366 | -44   | 106        | 112      | YPSGEER     |           |         |                  |
|                     | 858.5043   | 858.4598    | -0.0445 | -52   | 4          | 11       | LSSSVLPR    |           |         |                  |
|                     | 858.5043   | 858.4598    | -0.0445 | -52   | 4          | 11       | LSSSVLPR    | 15        | 0       |                  |
|                     | 993.4748   | 993.4468    | -0.028  | -28   | 105        | 112      | RYPAGEER    | 4         | 0       |                  |
|                     | 993.4748   | 993.4468    | -0.028  | -28   | 105        | 112      | RYPAGEER    |           |         |                  |
|                     | 1273.6609  | 1273.6387   | -0.0222 | -17   | 69         | 79       | GLGMTLSYLFR |           |         | Oxidation (M)[4] |
|                     | 1308.647   | 1308.627    | -0.02   | -15   | 80         | 90       | EPATINYPFEK |           |         |                  |
|                     | 1308.7092  | 1308.627    | -0.0822 | -63   | 1          | 11       | MYRLSSSVLPR | 15        | 0       |                  |

| Protein Name | Accession No. | Peptide Count | Protein Score | Protein Score C.I.% | Total Ion Score | Total Ion C.I. % | Best Ion Score | Best Ion C.I.% | % Coverage |      |
|--------------|---------------|---------------|---------------|---------------------|-----------------|------------------|----------------|----------------|------------|------|
| Dynamin-1    | spt P21575    | 16            | 136           | 100                 | 61              |                  | 99.99          | 35             | 94.41      | 19.2 |

| Peptide Information | Calc. Mass | Obsrv. Mass | ± da    | ± ppm | Start Seq. | End Seq. | Sequence     | Ion Score | C. I. % | Modification     |
|---------------------|------------|-------------|---------|-------|------------|----------|--------------|-----------|---------|------------------|
|                     | 804.4362   | 804.3316    | -0.1046 | -130  | 446        | 451      | LQQYPR       | 18        | 0       |                  |
|                     | 804.4362   | 804.3316    | -0.1046 | -130  | 446        | 451      | LQQYPR       |           |         |                  |
|                     | 839.5097   | 839.4064    | -0.1033 | -123  | 459        | 465      | IVTTHIR      |           |         |                  |
|                     | 839.5097   | 839.4064    | -0.1033 | -123  | 459        | 465      | IVTTHIR      |           |         |                  |
|                     | 877.489    | 877.396     | -0.093  | -106  | 230        | 237      | GYIGVVNR     |           |         |                  |
|                     | 1065.6415  | 1065.5826   | -0.0589 | -55   | 114        | 123      | GISPVPINLR   |           |         |                  |
|                     | 1065.6415  | 1065.5826   | -0.0589 | -55   | 114        | 123      | GISPVPINLR   |           |         |                  |
|                     | 1087.528   | 1087.4742   | -0.0538 | -49   | 316        | 324      | NFRPDDPAR    |           |         |                  |
|                     | 1107.5792  | 1107.5286   | -0.0506 | -46   | 45         | 54       | SSVLENFVGR   |           |         |                  |
|                     | 1153.5789  | 1153.542    | -0.0369 | -32   | 258        | 266      | FFLSHPSYR    |           |         |                  |
|                     | 1213.6284  | 1213.5955   | -0.0329 | -27   | 774        | 784      | SPTSSPTPQRR  |           |         |                  |
|                     | 1272.6616  | 1272.6207   | -0.0409 | -32   | 5          | 15       | GMEDLIPLVNR  |           |         | Oxidation (M)[2] |
|                     | 1281.6738  | 1281.6516   | -0.0222 | -17   | 257        | 266      | KFFLSHPSYR   |           |         |                  |
|                     | 1335.7491  | 1335.7313   | -0.0178 | -13   | 280        | 290      | VLNQLTNHIR   | 9         | 0       |                  |
|                     | 1335.7491  | 1335.7313   | -0.0178 | -13   | 280        | 290      | VLNQLTNHIR   |           |         |                  |
|                     | 1344.7118  | 1344.6942   | -0.0176 | -13   | 511        | 522      | TSGNQDEILVIR |           |         |                  |
|                     | 1375.7117  | 1375.6948   | -0.0169 | -12   | 584        | 594      | HIFALFNTEQR  |           |         |                  |

|           |           |         |     |     |     |                    |    |        |
|-----------|-----------|---------|-----|-----|-----|--------------------|----|--------|
| 1709.8857 | 1709.8916 | 0.0059  | 3   | 143 | 157 | VPVGDQPPDIEFQIR    |    |        |
| 1709.8857 | 1709.8916 | 0.0059  | 3   | 143 | 157 | VPVGDQPPDIEFQIR    | 35 | 94.406 |
| 1867.8668 | 1867.8815 | 0.0147  | 8   | 344 | 361 | IEGSGDQIDTYELSGGAR |    |        |
| 1923.0156 | 1922.9351 | -0.0805 | -42 | 328 | 343 | ALLQMVMQFAVDFEKR   |    |        |

| Protein Name                                | Accession No.  | Peptide Count | Protein Score | Protein Score C.I.% | Total Ion Score | Total Ion C.I. % | Best Ion Score | Best Ion C.I.% | % Coverage |      |
|---------------------------------------------|----------------|---------------|---------------|---------------------|-----------------|------------------|----------------|----------------|------------|------|
| Similar to Beta-soluble NSF attachment prot | rf XP_345448.1 | 12            | 184           | 100                 | 62              |                  | 99.989         | 28             | 69.815     | 45.0 |

| Peptide Information | Calc. Mass | Obsrv. Mass | ± da    | ± ppm | Start Seq. | End Seq. | Sequence            | Ion Score | C. I. % | Modification           |
|---------------------|------------|-------------|---------|-------|------------|----------|---------------------|-----------|---------|------------------------|
|                     | 817.4315   | 817.3925    | -0.039  | -48   | 23         | 29       | ASHSFLR             |           |         |                        |
|                     | 817.4315   | 817.3925    | -0.039  | -48   | 23         | 29       | ASHSFLR             | 12        | 0       |                        |
|                     | 821.4263   | 821.3889    | -0.0374 | -46   | 30         | 37       | GLFGGNTR            | 6         | 0       |                        |
|                     | 821.4263   | 821.3889    | -0.0374 | -46   | 30         | 37       | GLFGGNTR            |           |         |                        |
|                     | 853.405    | 853.3757    | -0.0293 | -34   | 314        | 320      | EFDSISR             |           |         |                        |
|                     | 853.405    | 853.3757    | -0.0293 | -34   | 314        | 320      | EFDSISR             |           |         |                        |
|                     | 1290.5808  | 1290.5914   | 0.0106  | 8     | 335        | 347      | SIQGDGEGDGLK        |           |         |                        |
|                     | 1317.5449  | 1317.5488   | 0.0039  | 3     | 38         | 47       | IEEACEMYTR          |           |         | Oxidation (M)[7]       |
|                     | 1390.6995  | 1390.7059   | 0.0064  | 5     | 9          | 20       | EAVQLMAEAEKR        |           |         | Oxidation (M)[6]       |
|                     | 1482.7587  | 1482.7645   | 0.0058  | 4     | 217        | 229      | VAAYAAQLEQYQK       | 23        | 10.917  |                        |
|                     | 1482.7587  | 1482.7645   | 0.0058  | 4     | 217        | 229      | VAAYAAQLEQYQK       |           |         |                        |
|                     | 1508.6362  | 1508.6476   | 0.0114  | 8     | 277        | 288      | YEEMFPAFTDSR        |           |         | Oxidation (M)[4]       |
|                     | 1508.6362  | 1508.6476   | 0.0114  | 8     | 277        | 288      | YEEMFPAFTDSR        | 28        | 69.815  | Oxidation (M)[4]       |
|                     | 1582.7133  | 1582.7227   | 0.0094  | 6     | 79         | 93       | HDSATSFVDAGNAYK     |           |         |                        |
|                     | 2060.9771  | 2060.9822   | 0.0051  | 2     | 296        | 313      | LLEAHEEQNSEAYTEAVK  |           |         |                        |
|                     | 2135.0688  | 2135.0667   | -0.0021 | -1    | 230        | 248      | AIEIYEQVGANTMDNPLLK |           |         | Oxidation (M)[13]      |
|                     | 2301.1372  | 2301.1565   | 0.0193  | 8     | 253        | 271      | DYFFKAALCHFIVDELNAK |           |         | Carbamidomethyl (C)[9] |

| Protein Name                     | Accession No.  | Peptide Count | Protein Score | Protein Score C.I.% | Total Ion Score | Total Ion C.I. % | Best Ion Score | Best Ion C.I.% | % Coverage |      |
|----------------------------------|----------------|---------------|---------------|---------------------|-----------------|------------------|----------------|----------------|------------|------|
| Similar to Endoplasmic precursor | rf XP_343193.1 | 15            | 97            | 100                 | 23              |                  | 0.315          | 13             | 0          | 21.4 |

| Peptide Information | Calc. Mass | Obsrv. Mass | ± da    | ± ppm | Start Seq. | End Seq. | Sequence               | Ion Score | C. I. % | Modification      |
|---------------------|------------|-------------|---------|-------|------------|----------|------------------------|-----------|---------|-------------------|
|                     | 876.4573   | 876.4227    | -0.0346 | -39   | 684        | 690      | TFEINPR                | 10        | 0       |                   |
|                     | 876.4573   | 876.4227    | -0.0346 | -39   | 684        | 690      | TFEINPR                |           |         |                   |
|                     | 982.4839   | 982.4222    | -0.0617 | -63   | 169        | 177      | SGTSEFLNK              |           |         |                   |
|                     | 993.5251   | 993.482     | -0.0431 | -43   | 725        | 733      | SGYLLPDTK              |           |         |                   |
|                     | 1015.473   | 1015.4648   | -0.0082 | -8    | 396        | 404      | GLFDEYGSK              |           |         |                   |
|                     | 1081.5425  | 1081.5229   | -0.0196 | -18   | 76         | 84       | FAFQAEVNR              |           |         |                   |
|                     | 1081.5425  | 1081.5229   | -0.0196 | -18   | 76         | 84       | FAFQAEVNR              | 13        | 0       |                   |
|                     | 1139.5803  | 1139.5702   | -0.0101 | -9    | 494        | 503      | LGVIEDHSNR             | 12        | 0       |                   |
|                     | 1139.5803  | 1139.5702   | -0.0101 | -9    | 494        | 503      | LGVIEDHSNR             |           |         |                   |
|                     | 1150.5375  | 1150.5322   | -0.0053 | -5    | 548        | 557      | EAESSPFVER             | 2         | 0       |                   |
|                     | 1150.5375  | 1150.5322   | -0.0053 | -5    | 548        | 557      | EAESSPFVER             |           |         |                   |
|                     | 1187.6782  | 1187.6688   | -0.0094 | -8    | 385        | 395      | SILFVPTSAPR            | 7         | 0       |                   |
|                     | 1187.6782  | 1187.6688   | -0.0094 | -8    | 385        | 395      | SILFVPTSAPR            |           |         |                   |
|                     | 1278.6324  | 1278.6666   | 0.0342  | 27    | 547        | 557      | KEAESSPFVER            |           |         |                   |
|                     | 1314.7627  | 1314.7678   | 0.0051  | 4     | 157        | 168      | EELVKNLGTIAK           |           |         |                   |
|                     | 1485.7544  | 1485.7611   | 0.0067  | 5     | 435        | 448      | GVVSDDLLPLNVSR         |           |         |                   |
|                     | 1529.774   | 1529.7706   | -0.0034 | -2    | 143        | 156      | NLLHVTDTGVGMTR         |           |         | Oxidation (M)[12] |
|                     | 1785.8977  | 1785.9075   | 0.0098  | 5     | 52         | 67       | EEEAIQLDGLNASQIR       |           |         |                   |
|                     | 2250.0422  | 2250.0491   | 0.0069  | 3     | 512        | 530      | FQSSHHSTDITSLDQYVER    |           |         |                   |
|                     | 2510.2332  | 2510.1072   | -0.126  | -50   | 703        | 724      | EDEDDKTVMDLAVLVFETATLR |           |         |                   |

| Protein Name                       | Accession No. | Peptide Count | Protein Score | Protein Score C.I.% | Total Ion Score | Total Ion C.I. % | Best Ion Score | Best Ion C.I.% | % Coverage |      |
|------------------------------------|---------------|---------------|---------------|---------------------|-----------------|------------------|----------------|----------------|------------|------|
| Ischemia responsive 94 kDa protein | trm O88600    | 12            | 135           | 100                 | 68              |                  | 99.996         | 31             | 81.481     | 19.0 |

| Peptide Information | Calc. Mass | Obsrv. Mass | ± da | ± ppm | Start Seq. | End Seq. | Sequence | Ion Score | C. I. % | Modification |
|---------------------|------------|-------------|------|-------|------------|----------|----------|-----------|---------|--------------|
|---------------------|------------|-------------|------|-------|------------|----------|----------|-----------|---------|--------------|



| Calc. Mass | Obsrv. Mass | ± da    | ± ppm | Start Seq. | End Seq. | Sequence           | Ion Score | C. I. % | Modification            |
|------------|-------------|---------|-------|------------|----------|--------------------|-----------|---------|-------------------------|
| 1149.5535  | 1149.525    | -0.0285 | -25   | 689        | 697      | FQESEERP           |           |         |                         |
| 1149.5535  | 1149.525    | -0.0285 | -25   | 689        | 697      | FQESEERP           | 2         | 0       |                         |
| 1239.5891  | 1239.5656   | -0.0235 | -19   | 74         | 84       | AFSDPFVIAEK        |           |         |                         |
| 1295.6954  | 1295.6725   | -0.0229 | -18   | 186        | 196      | QDLPALEEKPR        |           |         |                         |
| 1295.6954  | 1295.6725   | -0.0229 | -18   | 186        | 196      | QDLPALEEKPR        | 31        | 81.481  |                         |
| 1321.7111  | 1321.6946   | -0.0165 | -12   | 222        | 234      | VLATAFDITLGG       | 10        | 0       |                         |
| 1321.7111  | 1321.6946   | -0.0165 | -12   | 222        | 234      | VLATAFDITLGG       |           |         |                         |
| 1418.6256  | 1418.6123   | -0.0133 | -9    | 619        | 629      | NAVEEYVYEMR        |           |         | Oxidation (M)[10]       |
| 1492.7642  | 1492.7632   | -0.001  | -1    | 333        | 346      | EDIYAVEIVGGATR     |           |         |                         |
| 1492.7642  | 1492.7632   | -0.001  | -1    | 333        | 346      | EDIYAVEIVGGATR     |           |         |                         |
| 1495.7023  | 1495.7091   | 0.0068  | 5     | 20         | 33       | AGGIETIANEYSDR     |           |         |                         |
| 1495.7023  | 1495.7091   | 0.0068  | 5     | 20         | 33       | AGGIETIANEYSDR     | 28        | 60.315  |                         |
| 1519.7599  | 1519.7595   | -0.0004 | 0     | 361        | 374      | ELSTTLNADEAVTR     |           |         |                         |
| 1584.7653  | 1584.7662   | 0.0009  | 1     | 639        | 651      | FVSEDDRRNFTLK      |           |         |                         |
| 1584.7653  | 1584.7662   | 0.0009  | 1     | 639        | 651      | FVSEDDRRNFTLK      | 9         | 0       |                         |
| 1664.8094  | 1664.8004   | -0.009  | -5    | 155        | 169      | SVM DATQIAGLNCLR   |           |         | Carbamidomethyl (C)[13] |
| 1923.8389  | 1923.8826   | 0.0437  | 23    | 718        | 733      | NKEDQYEHDAADMTK    |           |         | Oxidation (M)[14]       |
| 2168.0691  | 2168.073    | 0.0039  | 2     | 135        | 153      | KPVVDCVSVPSFYTDAER |           |         | Carbamidomethyl (C)[6]  |

| Protein Name                       | Accession No. | Peptide Count | Protein Score | Protein Score C.I.% | Total Ion Score | Total Ion C.I. % | Best Ion Score | Best Ion C.I.% | % Coverage |      |
|------------------------------------|---------------|---------------|---------------|---------------------|-----------------|------------------|----------------|----------------|------------|------|
| Ischemia responsive 94 kDa protein | trm O88600    | 13            | 112           | 100                 | 18              |                  | 0              | 18             | 0          | 20.1 |

| Calc. Mass | Obsrv. Mass | ± da    | ± ppm | Start Seq. | End Seq. | Sequence              | Ion Score | C. I. % | Modification           |
|------------|-------------|---------|-------|------------|----------|-----------------------|-----------|---------|------------------------|
| 1149.5535  | 1149.5164   | -0.0371 | -32   | 689        | 697      | FQESEERP              |           |         |                        |
| 1149.5535  | 1149.5164   | -0.0371 | -32   | 689        | 697      | FQESEERP              |           |         |                        |
| 1239.5891  | 1239.5692   | -0.0199 | -16   | 74         | 84       | AFSDPFVIAEK           |           |         |                        |
| 1295.6954  | 1295.6669   | -0.0285 | -22   | 186        | 196      | QDLPALEEKPR           | 18        | 0       |                        |
| 1295.6954  | 1295.6669   | -0.0285 | -22   | 186        | 196      | QDLPALEEKPR           |           |         |                        |
| 1321.7111  | 1321.6921   | -0.019  | -14   | 222        | 234      | VLATAFDITLGG          |           |         |                        |
| 1321.7111  | 1321.6921   | -0.019  | -14   | 222        | 234      | VLATAFDITLGG          | 10        | 0       |                        |
| 1406.7023  | 1406.7363   | 0.034   | 24    | 687        | 697      | TRFQESEERP            |           |         |                        |
| 1418.6256  | 1418.6183   | -0.0073 | -5    | 619        | 629      | NAVEEYVYEMR           |           |         | Oxidation (M)[10]      |
| 1418.6256  | 1418.6183   | -0.0073 | -5    | 619        | 629      | NAVEEYVYEMR           |           |         | Oxidation (M)[10]      |
| 1492.7642  | 1492.767    | 0.0028  | 2     | 333        | 346      | EDIYAVEIVGGATR        |           |         |                        |
| 1495.7023  | 1495.7106   | 0.0083  | 6     | 20         | 33       | AGGIETIANEYSDR        |           |         |                        |
| 1495.7023  | 1495.7106   | 0.0083  | 6     | 20         | 33       | AGGIETIANEYSDR        | 5         | 0       |                        |
| 1519.7599  | 1519.7598   | -0.0001 | 0     | 361        | 374      | ELSTTLNADEAVTR        |           |         |                        |
| 1584.7653  | 1584.7729   | 0.0076  | 5     | 639        | 651      | FVSEDDRRNFTLK         |           |         |                        |
| 1584.7653  | 1584.7729   | 0.0076  | 5     | 639        | 651      | FVSEDDRRNFTLK         |           |         |                        |
| 1923.8389  | 1923.9281   | 0.0892  | 46    | 718        | 733      | NKEDQYEHDAADMTK       |           |         | Oxidation (M)[14]      |
| 2168.0691  | 2168.0793   | 0.0102  | 5     | 135        | 153      | KPVVDCVSVPSFYTDAER    |           |         | Carbamidomethyl (C)[6] |
| 2609.1421  | 2609.1243   | -0.0178 | -7    | 522        | 543      | MQVDQEEPHTEEQPQTPAENK |           |         | Oxidation (M)[1]       |

| Protein Name                                  | Accession No.  | Peptide Count | Protein Score | Protein Score C.I.% | Total Ion Score | Total Ion C.I. % | Best Ion Score | Best Ion C.I.% | % Coverage |      |
|-----------------------------------------------|----------------|---------------|---------------|---------------------|-----------------|------------------|----------------|----------------|------------|------|
| Similar to inner membrane protein, mitochondr | rf XP_232055.2 | 21            | 286           | 100                 | 95              |                  | 100            | 37             | 95.792     | 17.3 |

| Calc. Mass | Obsrv. Mass | ± da   | ± ppm | Start Seq. | End Seq. | Sequence  | Ion Score | C. I. % | Modification |
|------------|-------------|--------|-------|------------|----------|-----------|-----------|---------|--------------|
| 847.3845   | 847.4361    | 0.0516 | 61    | 67         | 72       | WDSHFR    |           |         |              |
| 914.5166   | 914.5511    | 0.0345 | 38    | 395        | 401      | RIDQLNR   |           |         |              |
| 967.5934   | 967.6302    | 0.0368 | 38    | 102        | 110      | KPIQSGPLK |           |         |              |
| 1053.5211  | 1053.5651   | 0.044  | 42    | 608        | 616      | GVYSEETLR |           |         |              |
| 1053.5211  | 1053.5651   | 0.044  | 42    | 608        | 616      | GVYSEETLR |           |         |              |
| 1075.5015  | 1075.5474   | 0.0459 | 43    | 442        | 450      | SEIQAEQDR |           |         |              |
| 1075.5015  | 1075.5474   | 0.0459 | 43    | 442        | 450      | SEIQAEQDR |           |         |              |
| 1119.5654  | 1119.6067   | 0.0413 | 37    | 470        | 479      | QAAHTDHLR |           |         |              |

|           |           |         |    |     |                            |    |                        |
|-----------|-----------|---------|----|-----|----------------------------|----|------------------------|
| 1119.5654 | 1119.6067 | 0.0413  | 37 | 470 | 479 QAAHTDHLR              | 20 | 0                      |
| 1153.5959 | 1153.6321 | 0.0362  | 31 | 180 | 189 ERPPPEVAAR             |    |                        |
| 1153.5959 | 1153.6321 | 0.0362  | 31 | 180 | 189 ERPPPEVAAR             | 10 | 0                      |
| 1271.579  | 1271.619  | 0.04    | 31 | 491 | 500 FEFEQDLSEK             |    |                        |
| 1271.579  | 1271.619  | 0.04    | 31 | 491 | 500 FEFEQDLSEK             |    |                        |
| 1287.6328 | 1287.6731 | 0.0403  | 31 | 501 | 510 LSEQELEFHR             |    |                        |
| 1287.6328 | 1287.6731 | 0.0403  | 31 | 501 | 510 LSEQELEFHR             | 37 | 95.792                 |
| 1314.7263 | 1314.8013 | 0.075   | 57 | 271 | 283 AVDEAADALLKAK          |    |                        |
| 1442.7961 | 1442.8079 | 0.0118  | 8  | 221 | 234 QTITAQNAAVQAVK         |    |                        |
| 1443.7339 | 1443.7886 | 0.0547  | 38 | 501 | 511 LSEQELEFHRR            |    |                        |
| 1518.7759 | 1518.8079 | 0.032   | 21 | 207 | 220 SLEDALNQTATVTR         |    |                        |
| 1527.8278 | 1527.8624 | 0.0346  | 23 | 338 | 350 VVSQYHELVVQAR          | 28 | 65.241                 |
| 1527.8278 | 1527.8624 | 0.0346  | 23 | 338 | 350 VVSQYHELVVQAR          |    |                        |
| 1563.79   | 1563.8019 | 0.0119  | 8  | 300 | 314 EIAGATPYITAAEEK        |    |                        |
| 1823.8882 | 1823.9142 | 0.026   | 14 | 532 | 548 GIEQAVQSHAVAEVEEAR     |    |                        |
| 1945.9899 | 1945.9927 | 0.0028  | 1  | 566 | 584 TSSAEMPTIPLGSAVEAIR    |    | Oxidation (M)[6]       |
| 1951.9832 | 1951.9971 | 0.0139  | 7  | 532 | 549 GIEQAVQSHAVAEVEEAR     |    |                        |
| 2003.0485 | 2003.048  | -0.0005 | 0  | 657 | 673 QLKPPAELYPEDINTFK      |    |                        |
| 2132.9553 | 2132.9539 | -0.0014 | -1 | 512 | 529 SQEQMDNFTLDINTAYAR     |    | Oxidation (M)[5]       |
| 2507.2083 | 2507.2253 | 0.017   | 7  | 585 | 607 VSCSDNEFTQALTAIPPESLTR |    | Carbamidomethyl (C)[3] |

| Protein Name                                |  | Accession No.  | Peptide Count | Protein Score | Protein Score C.I.% | Total Ion Score | Total Ion C.I. % | Best Ion Score | Best Ion C.I.% | % Coverage |
|---------------------------------------------|--|----------------|---------------|---------------|---------------------|-----------------|------------------|----------------|----------------|------------|
| Similar to inner membrane protein, mitochor |  | rfjXP_232055.2 | 18            | 222           | 100                 | 59              |                  | 99.979         | 30             | 16.4       |

| Peptide Information |             |         |       |            |          |                     |           |         |                  |  |
|---------------------|-------------|---------|-------|------------|----------|---------------------|-----------|---------|------------------|--|
| Calc. Mass          | Obsrv. Mass | ± da    | ± ppm | Start Seq. | End Seq. | Sequence            | Ion Score | C. I. % | Modification     |  |
| 914.5166            | 914.4207    | -0.0959 | -105  | 395        | 401      | RIDQLNR             |           |         |                  |  |
| 967.5934            | 967.5105    | -0.0829 | -86   | 102        | 110      | KPIQSGPLK           |           |         |                  |  |
| 1053.5211           | 1053.4613   | -0.0598 | -57   | 608        | 616      | GVYSEETLR           |           |         |                  |  |
| 1053.5211           | 1053.4613   | -0.0598 | -57   | 608        | 616      | GVYSEETLR           |           |         |                  |  |
| 1075.5015           | 1075.4496   | -0.0519 | -48   | 442        | 450      | SEIQAEQDR           |           |         |                  |  |
| 1119.5654           | 1119.5154   | -0.05   | -45   | 470        | 479      | QAAHTDHLR           | 9         | 0       |                  |  |
| 1119.5654           | 1119.5154   | -0.05   | -45   | 470        | 479      | QAAHTDHLR           |           |         |                  |  |
| 1153.5959           | 1153.5476   | -0.0483 | -42   | 180        | 189      | ERPPPEVAAR          | 3         | 0       |                  |  |
| 1153.5959           | 1153.5476   | -0.0483 | -42   | 180        | 189      | ERPPPEVAAR          |           |         |                  |  |
| 1271.579            | 1271.5503   | -0.0287 | -23   | 491        | 500      | FEFEQDLSEK          |           |         |                  |  |
| 1287.6328           | 1287.6105   | -0.0223 | -17   | 501        | 510      | LSEQELEFHR          |           |         |                  |  |
| 1287.6328           | 1287.6105   | -0.0223 | -17   | 501        | 510      | LSEQELEFHR          | 30        | 82.805  |                  |  |
| 1314.7263           | 1314.7397   | 0.0134  | 10    | 271        | 283      | AVDEAADALLKAK       |           |         |                  |  |
| 1442.7961           | 1442.7732   | -0.0229 | -16   | 221        | 234      | QTITAQNAAVQAVK      |           |         |                  |  |
| 1443.7339           | 1443.7538   | 0.0199  | 14    | 501        | 511      | LSEQELEFHRR         |           |         |                  |  |
| 1518.7759           | 1518.7734   | -0.0025 | -2    | 207        | 220      | SLEDALNQTATVTR      |           |         |                  |  |
| 1527.8278           | 1527.8322   | 0.0044  | 3     | 338        | 350      | VVSQYHELVVQAR       |           |         |                  |  |
| 1527.8278           | 1527.8322   | 0.0044  | 3     | 338        | 350      | VVSQYHELVVQAR       | 20        | 0       |                  |  |
| 1563.79             | 1563.7688   | -0.0212 | -14   | 300        | 314      | EIAGATPYITAAEEK     |           |         |                  |  |
| 1823.8882           | 1823.9055   | 0.0173  | 9     | 532        | 548      | GIEQAVQSHAVAEVEEAR  |           |         |                  |  |
| 1945.9899           | 1945.9873   | -0.0026 | -1    | 566        | 584      | TSSAEMPTIPLGSAVEAIR |           |         | Oxidation (M)[6] |  |
| 2003.0485           | 2003.0488   | 0.0003  | 0     | 657        | 673      | QLKPPAELYPEDINTFK   |           |         |                  |  |
| 2132.9553           | 2132.9534   | -0.0019 | -1    | 512        | 529      | SQEQMDNFTLDINTAYAR  |           |         | Oxidation (M)[5] |  |

| Protein Name |  | Accession No.  | Peptide Count | Protein Score | Protein Score C.I.% | Total Ion Score | Total Ion C.I. % | Best Ion Score | Best Ion C.I.% | % Coverage |
|--------------|--|----------------|---------------|---------------|---------------------|-----------------|------------------|----------------|----------------|------------|
| TOAD-64      |  | embjCAA86981.1 | 10            | 89            | 99.996              | 37              |                  | 96.134         | 24             | 23.3       |

| Peptide Information |             |         |       |            |          |          |           |         |              |  |
|---------------------|-------------|---------|-------|------------|----------|----------|-----------|---------|--------------|--|
| Calc. Mass          | Obsrv. Mass | ± da    | ± ppm | Start Seq. | End Seq. | Sequence | Ion Score | C. I. % | Modification |  |
| 844.4999            | 844.4651    | -0.0348 | -41   | 486        | 492      | SRLAELR  |           |         |              |  |
| 844.4999            | 844.4651    | -0.0348 | -41   | 486        | 492      | SRLAELR  |           |         |              |  |
| 908.4988            | 908.4571    | -0.0417 | -46   | 391        | 397      | VFNLVPR  |           |         |              |  |

|           |           |         |     |     |     |                       |    |  |       |                  |
|-----------|-----------|---------|-----|-----|-----|-----------------------|----|--|-------|------------------|
| 1140.6088 | 1140.5663 | -0.0425 | -37 | 472 | 480 | KPFPDFVYK             |    |  |       |                  |
| 1262.6296 | 1262.6003 | -0.0293 | -23 | 147 | 157 | GIQEEMALVK            |    |  |       | Oxidation (M)[6] |
| 1310.6885 | 1310.6648 | -0.0237 | -18 | 64  | 75  | MVIPGGIDVHTR          |    |  |       | Oxidation (M)[1] |
| 1310.6885 | 1310.6648 | -0.0237 | -18 | 64  | 75  | MVIPGGIDVHTR          |    |  |       | Oxidation (M)[1] |
| 1323.7631 | 1323.6582 | -0.1049 | -79 | 44  | 56  | QIGENLIVPGGVK         |    |  |       |                  |
| 1323.7631 | 1323.6582 | -0.1049 | -79 | 44  | 56  | QIGENLIVPGGVK         |    |  |       |                  |
| 1682.8707 | 1682.8744 | 0.0037  | 2   | 452 | 467 | IVLEDGTLHVTEGSGR      | 13 |  | 0     |                  |
| 1682.8707 | 1682.8744 | 0.0037  | 2   | 452 | 467 | IVLEDGTLHVTEGSGR      |    |  |       |                  |
| 1741.8062 | 1741.7601 | -0.0461 | -26 | 375 | 390 | MDENQFVAVTSTNAAK      |    |  |       | Oxidation (M)[1] |
| 1741.8062 | 1741.7601 | -0.0461 | -26 | 375 | 390 | MDENQFVAVTSTNAAK      |    |  |       | Oxidation (M)[1] |
| 2169.0684 | 2169.0725 | 0.0041  | 2   | 533 | 552 | NLHQSGFSLSGAQIDDNIPR  |    |  |       |                  |
| 2169.0684 | 2169.0725 | 0.0041  | 2   | 533 | 552 | NLHQSGFSLSGAQIDDNIPR  | 24 |  | 20.71 |                  |
| 2377.1741 | 2377.1707 | -0.0034 | -1  | 190 | 211 | DIGAIAQVHAENGDIAEEQQR |    |  |       |                  |
| 2377.1741 | 2377.1707 | -0.0034 | -1  | 190 | 211 | DIGAIAQVHAENGDIAEEQQR |    |  |       |                  |

| Protein Name            |  | Accession No.  | Peptide Count | Protein Score | Protein Score |        | Total Ion Score | Total Ion C.I. % | Best Ion Score | Best Ion C.I. % | % Coverage |
|-------------------------|--|----------------|---------------|---------------|---------------|--------|-----------------|------------------|----------------|-----------------|------------|
| Unnamed protein product |  | embjCAA37654.1 | 9             | 67            | C.I.%         | 99.377 | 10              |                  | 0              | 10              | 20.6       |
| Peptide Information     |  |                |               |               |               |        |                 |                  |                |                 |            |

| Calc. Mass | Obsrv. Mass | ± da    | ± ppm | Start Seq. | End Seq. | Sequence                 | Ion Score | C. I. % | Modification            |
|------------|-------------|---------|-------|------------|----------|--------------------------|-----------|---------|-------------------------|
| 833.39     | 833.3402    | -0.0498 | -60   | 276        | 283      | APGFGDNR                 |           |         |                         |
| 833.39     | 833.3402    | -0.0498 | -60   | 276        | 283      | APGFGDNR                 |           |         |                         |
| 855.4682   | 855.4205    | -0.0477 | -56   | 108        | 115      | GANPVEIR                 |           |         |                         |
| 855.4682   | 855.4205    | -0.0477 | -56   | 108        | 115      | GANPVEIR                 |           |         |                         |
| 961.4849   | 961.4583    | -0.0266 | -28   | 276        | 284      | APGFGDNRK                |           |         |                         |
| 1320.6827  | 1320.7155   | 0.0328  | 25    | 155        | 166      | DIGNIISDAMKK             |           |         | Oxidation (M)[10]       |
| 1320.6827  | 1320.7155   | 0.0328  | 25    | 155        | 166      | DIGNIISDAMKK             |           |         | Oxidation (M)[10]       |
| 1389.7048  | 1389.6965   | -0.0083 | -6    | 196        | 207      | GYISPYFINTSK             |           |         |                         |
| 1684.905   | 1684.9152   | 0.0102  | 6     | 404        | 420      | AAVEEGIVLGGGCALLR        |           |         | Carbamidomethyl (C)[13] |
| 1684.905   | 1684.9152   | 0.0102  | 6     | 404        | 420      | AAVEEGIVLGGGCALLR        |           |         | Carbamidomethyl (C)[13] |
| 1905.0552  | 1905.0712   | 0.016   | 8     | 225        | 242      | ISSVQSIVPALEIANAHR       |           |         |                         |
| 1905.0552  | 1905.0712   | 0.016   | 8     | 225        | 242      | ISSVQSIVPALEIANAHR       |           |         |                         |
| 2040.002   | 2040.0024   | 0.0004  | 0     | 345        | 361      | IQEITEQLDITTSEYEK        |           |         |                         |
| 2040.002   | 2040.0024   | 0.0004  | 0     | 345        | 361      | IQEITEQLDITTSEYEK        |           |         |                         |
| 2560.2485  | 2560.2329   | -0.0156 | -6    | 71         | 95       | LVQDVANNTNEEAGDGTATVTLAR |           |         |                         |
| 2560.2485  | 2560.2329   | -0.0156 | -6    | 71         | 95       | LVQDVANNTNEEAGDGTATVTLAR | 10        |         | 0                       |

| Protein Name        |  | Accession No. | Peptide Count | Protein Score | Protein Score |     | Total Ion Score | Total Ion C.I. % | Best Ion Score | Best Ion C.I. % | % Coverage |
|---------------------|--|---------------|---------------|---------------|---------------|-----|-----------------|------------------|----------------|-----------------|------------|
| GRP75               |  | gbjAAB34982.1 | 21            | 434           | C.I.%         | 100 | 238             |                  | 100            | 54              | 36.5       |
| Peptide Information |  |               |               |               |               |     |                 |                  |                |                 |            |

| Calc. Mass | Obsrv. Mass | ± da    | ± ppm | Start Seq. | End Seq. | Sequence      | Ion Score | C. I. % | Modification     |
|------------|-------------|---------|-------|------------|----------|---------------|-----------|---------|------------------|
| 863.4039   | 863.3914    | -0.0125 | -14   | 301        | 307      | DNMALQR       |           |         | Oxidation (M)[3] |
| 863.4039   | 863.3914    | -0.0125 | -14   | 301        | 307      | DNMALQR       |           |         | Oxidation (M)[3] |
| 938.4326   | 938.4202    | -0.0124 | -13   | 568        | 574      | YAEEDRR       |           |         |                  |
| 938.4326   | 938.4202    | -0.0124 | -13   | 568        | 574      | YAEEDRR       | 13        |         | 0                |
| 958.4952   | 958.4924    | -0.0028 | -3    | 77         | 85       | VLENAEGAR     | 32        |         | 73.467           |
| 958.4952   | 958.4924    | -0.0028 | -3    | 77         | 85       | VLENAEGAR     |           |         |                  |
| 1148.5542  | 1148.5575   | 0.0033  | 3     | 625        | 634      | KDSETGENIR    | 7         |         | 0                |
| 1148.5542  | 1148.5575   | 0.0033  | 3     | 625        | 634      | KDSETGENIR    |           |         |                  |
| 1149.5535  | 1149.556    | 0.0025  | 2     | 127        | 135      | RYDDPEVQK     |           |         |                  |
| 1149.5535  | 1149.556    | 0.0025  | 2     | 127        | 135      | RYDDPEVQK     | 5         |         | 0                |
| 1231.6641  | 1231.6561   | -0.008  | -6    | 635        | 646      | QAASSLQQASLK  |           |         |                  |
| 1242.6801  | 1242.688    | 0.0079  | 6     | 207        | 218      | DAGQISGLNVLRL |           |         |                  |
| 1242.6801  | 1242.688    | 0.0079  | 6     | 207        | 218      | DAGQISGLNVLRL | 28        |         | 31.169           |
| 1290.6801  | 1290.6891   | 0.009   | 7     | 395        | 405      | VQQTVDLFGFR   |           |         |                  |
| 1290.6801  | 1290.6891   | 0.009   | 7     | 395        | 405      | VQQTVDLFGFR   | 54        |         | 99.836           |
| 1333.6383  | 1333.6694   | 0.0311  | 23    | 176        | 187      | ETAENYLGHATAK |           |         |                  |

|           |           |         |    |     |     |                     |    |        |                   |  |  |
|-----------|-----------|---------|----|-----|-----|---------------------|----|--------|-------------------|--|--|
| 1333.6383 | 1333.6694 | 0.0311  | 23 | 176 | 187 | ETAENYLGHATAK       |    |        |                   |  |  |
| 1462.757  | 1462.751  | -0.006  | -4 | 378 | 391 | SDIGEVILVGGMTR      | 15 | 0      | Oxidation (M)[12] |  |  |
| 1462.757  | 1462.751  | -0.006  | -4 | 378 | 391 | SDIGEVILVGGMTR      |    |        | Oxidation (M)[12] |  |  |
| 1473.7908 | 1473.7863 | -0.0045 | -3 | 542 | 555 | EQQIVIQSSGGLSK      |    |        |                   |  |  |
| 1473.7908 | 1473.7863 | -0.0045 | -3 | 542 | 555 | EQQIVIQSSGGLSK      |    |        |                   |  |  |
| 1476.7329 | 1476.743  | 0.0101  | 7  | 86  | 99  | TTPSVVAFTPDGER      | 19 | 0      |                   |  |  |
| 1476.7329 | 1476.743  | 0.0101  | 7  | 86  | 99  | TTPSVVAFTPDGER      |    |        |                   |  |  |
| 1568.7704 | 1568.7688 | -0.0016 | -1 | 108 | 121 | QAVTNPNTFYATK       |    |        |                   |  |  |
| 1568.7704 | 1568.7688 | -0.0016 | -1 | 108 | 121 | QAVTNPNTFYATK       |    |        |                   |  |  |
| 1592.9523 | 1592.9652 | 0.0129  | 8  | 499 | 513 | LLGQFTLIGIPPAPR     | 16 | 0      |                   |  |  |
| 1592.9523 | 1592.9652 | 0.0129  | 8  | 499 | 513 | LLGQFTLIGIPPAPR     |    |        |                   |  |  |
| 1608.7687 | 1608.7673 | -0.0014 | -1 | 174 | 187 | MKETAENYLGHATAK     |    |        | Oxidation (M)[1]  |  |  |
| 1608.7687 | 1608.7673 | -0.0014 | -1 | 174 | 187 | MKETAENYLGHATAK     |    |        | Oxidation (M)[1]  |  |  |
| 1645.8795 | 1645.8699 | -0.0096 | -6 | 219 | 234 | VINEPTAAALAYGLDK    |    |        |                   |  |  |
| 1694.8496 | 1694.8625 | 0.0129  | 8  | 188 | 202 | NAVITVPAYFNDSQR     |    |        |                   |  |  |
| 1694.8496 | 1694.8625 | 0.0129  | 8  | 188 | 202 | NAVITVPAYFNDSQR     | 31 | 68.538 |                   |  |  |
| 1808.9025 | 1808.8992 | -0.0033 | -2 | 469 | 485 | SQVFSTAADGQTQVEIK   |    |        |                   |  |  |
| 1808.9025 | 1808.8992 | -0.0033 | -2 | 469 | 485 | SQVFSTAADGQTQVEIK   |    |        |                   |  |  |
| 1872.9008 | 1872.8928 | -0.008  | -4 | 579 | 595 | VEAVNMAEGIIHDTETK   |    |        | Oxidation (M)[6]  |  |  |
| 2055.9617 | 2055.9753 | 0.0136  | 7  | 266 | 284 | STNGDTFLGGEDFDQALLR | 25 | 0      |                   |  |  |
| 2055.9617 | 2055.9753 | 0.0136  | 7  | 266 | 284 | STNGDTFLGGEDFDQALLR |    |        |                   |  |  |
| 2158.0444 | 2158.0415 | -0.0029 | -1 | 577 | 595 | ERVEAVNMAEGIIHDTETK |    |        | Oxidation (M)[8]  |  |  |
| 2158.0444 | 2158.0415 | -0.0029 | -1 | 577 | 595 | ERVEAVNMAEGIIHDTETK |    |        | Oxidation (M)[8]  |  |  |

| Protein Name        |             | Accession No. | Peptide Count | Protein Score | Protein Score |                | Total Ion Score | Total Ion C.I. % | Best Ion Score    | Best Ion C.I. % | % Coverage |      |
|---------------------|-------------|---------------|---------------|---------------|---------------|----------------|-----------------|------------------|-------------------|-----------------|------------|------|
| GRP75               |             | gb AAB34982.1 | 23            | 459           | C.I.%         | 100            | 240             |                  | 100               | 53              | 99.825     | 39.5 |
| Peptide Information |             |               |               |               |               |                |                 |                  |                   |                 |            |      |
| Calc. Mass          | Obsrv. Mass | ± da          | ± ppm         | Start Seq.    | End Seq.      | Sequence       | Ion Score       | C. I. %          | Modification      |                 |            |      |
| 863.4039            | 863.3858    | -0.0181       | -21           | 301           | 307           | DNMALQR        |                 |                  | Oxidation (M)[3]  |                 |            |      |
| 863.4039            | 863.3858    | -0.0181       | -21           | 301           | 307           | DNMALQR        |                 |                  | Oxidation (M)[3]  |                 |            |      |
| 917.4437            | 917.4251    | -0.0186       | -20           | 647           | 653           | LFEMAYK        |                 |                  | Oxidation (M)[4]  |                 |            |      |
| 938.4326            | 938.418     | -0.0146       | -16           | 568           | 574           | YAEEDRR        |                 |                  |                   |                 |            |      |
| 938.4326            | 938.418     | -0.0146       | -16           | 568           | 574           | YAEEDRR        | 16              | 0                |                   |                 |            |      |
| 958.4952            | 958.4919    | -0.0033       | -3            | 77            | 85            | VLENAEGAR      | 31              | 68.216           |                   |                 |            |      |
| 958.4952            | 958.4919    | -0.0033       | -3            | 77            | 85            | VLENAEGAR      |                 |                  |                   |                 |            |      |
| 1020.4592           | 1020.4608   | 0.0016        | 2             | 626           | 634           | DSETGENIR      | 8               | 0                |                   |                 |            |      |
| 1020.4592           | 1020.4608   | 0.0016        | 2             | 626           | 634           | DSETGENIR      |                 |                  |                   |                 |            |      |
| 1148.5542           | 1148.5631   | 0.0089        | 8             | 625           | 634           | KDSETGENIR     |                 |                  |                   |                 |            |      |
| 1148.5542           | 1148.5631   | 0.0089        | 8             | 625           | 634           | KDSETGENIR     |                 |                  |                   |                 |            |      |
| 1149.5535           | 1149.5597   | 0.0062        | 5             | 127           | 135           | RYDDPEVQK      | 8               | 0                |                   |                 |            |      |
| 1149.5535           | 1149.5597   | 0.0062        | 5             | 127           | 135           | RYDDPEVQK      |                 |                  |                   |                 |            |      |
| 1231.6641           | 1231.6611   | -0.003        | -2            | 635           | 646           | QAASSLQQASLK   |                 |                  |                   |                 |            |      |
| 1242.6801           | 1242.6963   | 0.0162        | 13            | 207           | 218           | DAGQISGLNVLR   | 41              | 96.999           |                   |                 |            |      |
| 1242.6801           | 1242.6963   | 0.0162        | 13            | 207           | 218           | DAGQISGLNVLR   |                 |                  |                   |                 |            |      |
| 1290.6801           | 1290.6976   | 0.0175        | 14            | 395           | 405           | VQQTVDLFGFR    |                 |                  |                   |                 |            |      |
| 1290.6801           | 1290.6976   | 0.0175        | 14            | 395           | 405           | VQQTVDLFGFR    | 53              | 99.825           |                   |                 |            |      |
| 1333.6383           | 1333.6544   | 0.0161        | 12            | 176           | 187           | ETAENYLGHATAK  |                 |                  |                   |                 |            |      |
| 1333.6383           | 1333.6544   | 0.0161        | 12            | 176           | 187           | ETAENYLGHATAK  | 10              | 0                |                   |                 |            |      |
| 1357.7546           | 1357.6287   | -0.1259       | -93           | 12            | 25            | LVGTTASRSPAAAR |                 |                  |                   |                 |            |      |
| 1462.757            | 1462.7611   | 0.0041        | 3             | 378           | 391           | SDIGEVILVGGMTR |                 |                  | Oxidation (M)[12] |                 |            |      |
| 1462.757            | 1462.7611   | 0.0041        | 3             | 378           | 391           | SDIGEVILVGGMTR | 12              | 0                | Oxidation (M)[12] |                 |            |      |
| 1473.7908           | 1473.7924   | 0.0016        | 1             | 542           | 555           | EQQIVIQSSGGLSK |                 |                  |                   |                 |            |      |
| 1473.7908           | 1473.7924   | 0.0016        | 1             | 542           | 555           | EQQIVIQSSGGLSK |                 |                  |                   |                 |            |      |
| 1476.7329           | 1476.754    | 0.0211        | 14            | 86            | 99            | TTPSVVAFTPDGER | 19              | 0                |                   |                 |            |      |
| 1476.7329           | 1476.754    | 0.0211        | 14            | 86            | 99            | TTPSVVAFTPDGER |                 |                  |                   |                 |            |      |
| 1568.7704           | 1568.7734   | 0.003         | 2             | 108           | 121           | QAVTNPNTFYATK  |                 |                  |                   |                 |            |      |
| 1568.7704           | 1568.7734   | 0.003         | 2             | 108           | 121           | QAVTNPNTFYATK  |                 |                  |                   |                 |            |      |

|           |           |         |     |     |     |                     |    |        |  |                  |
|-----------|-----------|---------|-----|-----|-----|---------------------|----|--------|--|------------------|
| 1592.9523 | 1592.9716 | 0.0193  | 12  | 499 | 513 | LLGQFTLIGIPPAPR     |    |        |  |                  |
| 1645.8795 | 1645.8784 | -0.0011 | -1  | 219 | 234 | VINEPTAAALAYGLDK    |    |        |  |                  |
| 1694.8496 | 1694.8734 | 0.0238  | 14  | 188 | 202 | NAVITVPAYFNDSQR     |    |        |  |                  |
| 1694.8496 | 1694.8734 | 0.0238  | 14  | 188 | 202 | NAVITVPAYFNDSQR     | 51 | 99.719 |  |                  |
| 1802.9503 | 1802.9326 | -0.0177 | -10 | 378 | 394 | SDIGEVILVGGMTRMPK   |    |        |  |                  |
| 1808.9025 | 1808.9114 | 0.0089  | 5   | 469 | 485 | SQVFSTAADGQTQVEIK   |    |        |  |                  |
| 1808.9025 | 1808.9114 | 0.0089  | 5   | 469 | 485 | SQVFSTAADGQTQVEIK   |    |        |  |                  |
| 1872.9008 | 1872.9015 | 0.0007  | 0   | 579 | 595 | VEAVNMAEGIIHDTETK   |    |        |  | Oxidation (M)[6] |
| 2055.9617 | 2055.9641 | 0.0024  | 1   | 266 | 284 | STNGDTFLGGEDFDQALLR |    |        |  |                  |

| Protein Name                            | Accession No. | Peptide Count | Protein Score | Protein Score |          | Total Ion Score    | Total Ion C.I. % | Best Ion Score | Best Ion C.I. % | % Coverage             |      |
|-----------------------------------------|---------------|---------------|---------------|---------------|----------|--------------------|------------------|----------------|-----------------|------------------------|------|
|                                         |               |               |               | C.I. %        |          |                    |                  |                |                 |                        |      |
| Serum albumin precursor [Contains: NRP] | spt P02770    | 10            | 157           | 100           |          | 85                 |                  | 100            | 66              | 99.989                 | 19.2 |
| Peptide Information                     |               |               |               |               |          |                    |                  |                |                 |                        |      |
| Calc. Mass                              | Obsrv. Mass   | ± da          | ± ppm         | Start Seq.    | End Seq. | Sequence           | Ion Score        | C. I. %        | Modification    |                        |      |
| 844.4998                                | 844.4612      | -0.0386       | -46           | 453           | 460      | NLGRVGTK           |                  |                |                 |                        |      |
| 844.4998                                | 844.4612      | -0.0386       | -46           | 453           | 460      | NLGRVGTK           |                  |                |                 |                        |      |
| 1017.5363                               | 1017.509      | -0.0273       | -27           | 89            | 97       | SIHTLFGDK          |                  |                |                 |                        |      |
| 1149.615                                | 1149.6011     | -0.0139       | -12           | 66            | 75       | LVQEVTDFAK         |                  |                |                 |                        |      |
| 1149.615                                | 1149.6011     | -0.0139       | -12           | 66            | 75       | LVQEVTDFAK         | 2                | 0              |                 |                        |      |
| 1248.6371                               | 1248.6411     | 0.004         | 3             | 35            | 44       | FKDLGEQHFK         |                  |                |                 |                        |      |
| 1266.6365                               | 1266.6373     | 0.0008        | 1             | 247           | 257      | FPNAEFAEITK        |                  |                |                 |                        |      |
| 1266.6365                               | 1266.6373     | 0.0008        | 1             | 247           | 257      | FPNAEFAEITK        |                  |                |                 |                        |      |
| 1299.7056                               | 1299.7208     | 0.0152        | 12            | 362           | 372      | HPDYSVSLLLR        |                  |                |                 |                        |      |
| 1439.7853                               | 1439.8132     | 0.0279        | 19            | 439           | 452      | APQVSTPTLVEAAR     | 66               | 99.989         |                 |                        |      |
| 1439.7853                               | 1439.8132     | 0.0279        | 19            | 439           | 452      | APQVSTPTLVEAAR     |                  |                |                 |                        |      |
| 1465.7798                               | 1465.8114     | 0.0316        | 22            | 422           | 434      | LGEYGFQNAVLVR      | 19               | 0              |                 |                        |      |
| 1465.7798                               | 1465.8114     | 0.0316        | 22            | 422           | 434      | LGEYGFQNAVLVR      |                  |                |                 |                        |      |
| 1479.8569                               | 1479.8076     | -0.0493       | -33           | 45            | 57       | GLVLIAFSQYLQK      |                  |                |                 |                        |      |
| 1948.9181                               | 1948.9451     | 0.027         | 14            | 585           | 602      | AADKDNCFATEGPNLVAR |                  |                |                 | Carbamidomethyl (C)[7] |      |

| Protein Name                            | Accession No. | Peptide Count | Protein Score | Protein Score |          | Total Ion Score    | Total Ion C.I. % | Best Ion Score | Best Ion C.I. % | % Coverage               |      |
|-----------------------------------------|---------------|---------------|---------------|---------------|----------|--------------------|------------------|----------------|-----------------|--------------------------|------|
|                                         |               |               |               | C.I. %        |          |                    |                  |                |                 |                          |      |
| Serum albumin precursor [Contains: NRP] | spt P02770    | 9             | 111           | 100           |          | 48                 |                  | 99.453         | 43              | 98.271                   | 19.2 |
| Peptide Information                     |               |               |               |               |          |                    |                  |                |                 |                          |      |
| Calc. Mass                              | Obsrv. Mass   | ± da          | ± ppm         | Start Seq.    | End Seq. | Sequence           | Ion Score        | C. I. %        | Modification    |                          |      |
| 1017.5363                               | 1017.5228     | -0.0135       | -13           | 89            | 97       | SIHTLFGDK          |                  |                |                 |                          |      |
| 1075.4877                               | 1075.4866     | -0.0011       | -1            | 58            | 65       | CPYEEDIK           |                  |                |                 | Carbamidomethyl (C)[1]   |      |
| 1075.4877                               | 1075.4866     | -0.0011       | -1            | 58            | 65       | CPYEEDIK           |                  |                |                 | Carbamidomethyl (C)[1]   |      |
| 1149.615                                | 1149.6062     | -0.0088       | -8            | 66            | 75       | LVQEVTDFAK         |                  |                |                 |                          |      |
| 1149.615                                | 1149.6062     | -0.0088       | -8            | 66            | 75       | LVQEVTDFAK         |                  |                |                 |                          |      |
| 1266.6365                               | 1266.6385     | 0.002         | 2             | 247           | 257      | FPNAEFAEITK        |                  |                |                 |                          |      |
| 1266.6365                               | 1266.6385     | 0.002         | 2             | 247           | 257      | FPNAEFAEITK        |                  |                |                 |                          |      |
| 1439.7853                               | 1439.811      | 0.0257        | 18            | 439           | 452      | APQVSTPTLVEAAR     | 43               | 98.271         |                 |                          |      |
| 1439.7853                               | 1439.811      | 0.0257        | 18            | 439           | 452      | APQVSTPTLVEAAR     |                  |                |                 |                          |      |
| 1459.7396                               | 1459.7402     | 0.0006        | 0             | 299           | 310      | LQACCDKPVLQK       |                  |                |                 | Carbamidomethyl (C)[4,5] |      |
| 1465.7798                               | 1465.8074     | 0.0276        | 19            | 422           | 434      | LGEYGFQNAVLVR      |                  |                |                 |                          |      |
| 1465.7798                               | 1465.8074     | 0.0276        | 19            | 422           | 434      | LGEYGFQNAVLVR      |                  |                |                 |                          |      |
| 1746.731                                | 1746.7449     | 0.0139        | 8             | 185           | 198      | YNEVLTQCCTESDK     |                  |                |                 | Carbamidomethyl (C)[8,9] |      |
| 1948.9181                               | 1948.9393     | 0.0212        | 11            | 585           | 602      | AADKDNCFATEGPNLVAR | 5                | 0              |                 | Carbamidomethyl (C)[7]   |      |
| 1948.9181                               | 1948.9393     | 0.0212        | 11            | 585           | 602      | AADKDNCFATEGPNLVA  |                  |                |                 | Carbamidomethyl (C)[7]   |      |

| Protein Name        | Accession No.  | Peptide Count | Protein Score | Protein Score |          | Total Ion Score | Total Ion C.I. % | Best Ion Score | Best Ion C.I. % | % Coverage |      |
|---------------------|----------------|---------------|---------------|---------------|----------|-----------------|------------------|----------------|-----------------|------------|------|
|                     |                |               |               | C.I. %        |          |                 |                  |                |                 |            |      |
| TOAD-64             | emb CAA86981.1 | 13            | 260           | 100           |          | 125             |                  | 100            | 40              | 96.9       | 31.6 |
| Peptide Information |                |               |               |               |          |                 |                  |                |                 |            |      |
| Calc. Mass          | Obsrv. Mass    | ± da          | ± ppm         | Start Seq.    | End Seq. | Sequence        | Ion Score        | C. I. %        | Modification    |            |      |
| 813.4213            | 813.4429       | 0.0216        | 27            | 57            | 63       | TIEAHSR         |                  |                |                 |            |      |

|           |           |        |    |     |     |                      |    |        |                         |  |
|-----------|-----------|--------|----|-----|-----|----------------------|----|--------|-------------------------|--|
| 813.4213  | 813.4429  | 0.0216 | 27 | 57  | 63  | TIEAHSR              |    |        |                         |  |
| 844.4999  | 844.5322  | 0.0323 | 38 | 486 | 492 | SRLAELR              |    |        |                         |  |
| 844.4999  | 844.5322  | 0.0323 | 38 | 486 | 492 | SRLAELR              |    |        |                         |  |
| 908.4988  | 908.5226  | 0.0238 | 26 | 391 | 397 | VFNLVPR              | 40 | 96.9   |                         |  |
| 908.4988  | 908.5226  | 0.0238 | 26 | 391 | 397 | VFNLVPR              |    |        |                         |  |
| 1015.553  | 1015.5812 | 0.0282 | 28 | 259 | 268 | SAAEVIAQAR           | 24 | 0      |                         |  |
| 1015.553  | 1015.5812 | 0.0282 | 28 | 259 | 268 | SAAEVIAQAR           |    |        |                         |  |
| 1310.6885 | 1310.7111 | 0.0226 | 17 | 64  | 75  | MVIPGGIDVHTR         | 13 | 0      | Oxidation (M)[1]        |  |
| 1310.6885 | 1310.7111 | 0.0226 | 17 | 64  | 75  | MVIPGGIDVHTR         |    |        | Oxidation (M)[1]        |  |
| 1323.7631 | 1323.7725 | 0.0094 | 7  | 44  | 56  | QIGENLIVPGGVK        |    |        |                         |  |
| 1682.8707 | 1682.9086 | 0.0379 | 23 | 452 | 467 | IVLEDGTLHVTEGSGR     | 26 | 23.388 |                         |  |
| 1682.8707 | 1682.9086 | 0.0379 | 23 | 452 | 467 | IVLEDGTLHVTEGSGR     |    |        |                         |  |
| 1741.8062 | 1741.8167 | 0.0105 | 6  | 375 | 390 | MDENQFVAVTSTNAAK     |    |        | Oxidation (M)[1]        |  |
| 1741.8062 | 1741.8167 | 0.0105 | 6  | 375 | 390 | MDENQFVAVTSTNAAK     |    |        | Oxidation (M)[1]        |  |
| 1792.8348 | 1792.8622 | 0.0274 | 15 | 346 | 361 | DNFTLIPEGTNGTEER     | 21 | 0      |                         |  |
| 1792.8348 | 1792.8622 | 0.0274 | 15 | 346 | 361 | DNFTLIPEGTNGTEER     |    |        |                         |  |
| 1822.9368 | 1822.9539 | 0.0171 | 9  | 239 | 254 | SITIANQNTNCPLYVTK    |    |        | Carbamidomethyl (C)[10] |  |
| 2169.0684 | 2169.0928 | 0.0244 | 11 | 533 | 552 | NLHQSGFSLGAQIDDNIPR  |    |        |                         |  |
| 2182.9055 | 2182.9204 | 0.0149 | 7  | 76  | 94  | FQMPDQGMTSADDFQGTK   |    |        | Oxidation (M)[3,8]      |  |
| 2377.1741 | 2377.2129 | 0.0388 | 16 | 190 | 211 | DIGAIQVHAENGDIIEEQQR |    |        |                         |  |
| 2377.1741 | 2377.2129 | 0.0388 | 16 | 190 | 211 | DIGAIQVHAENGDIIEEQQR |    |        |                         |  |

| Protein Name                                   | Accession No.  | Peptide Count | Protein Score | Protein Score |          | Total Ion Score  | Total Ion C.I. % | Best Ion |                         | % Coverage |      |
|------------------------------------------------|----------------|---------------|---------------|---------------|----------|------------------|------------------|----------|-------------------------|------------|------|
|                                                |                |               |               | C.I.%         |          |                  |                  | C.I.%    |                         |            |      |
| Similar to ATPase, H+ transporting, V1 subunit | rfjXP_340988.1 | 28            | 488           | 100           |          | 272              |                  | 100      | 54                      | 99.858     | 42.9 |
| Peptide Information                            |                |               |               |               |          |                  |                  |          |                         |            |      |
| Calc. Mass                                     | Obsrv. Mass    | ± da          | ± ppm         | Start Seq.    | End Seq. | Sequence         | Ion Score        | C. I. %  | Modification            |            |      |
| 845.3934                                       | 845.3832       | -0.0102       | -12           | 394           | 400      | CLGNPER          |                  |          | Carbamidomethyl (C)[1]  |            |      |
| 845.3934                                       | 845.3832       | -0.0102       | -12           | 394           | 400      | CLGNPER          |                  |          | Carbamidomethyl (C)[1]  |            |      |
| 861.3963                                       | 861.3744       | -0.0219       | -25           | 531           | 536      | FCPFYK           |                  |          | Carbamidomethyl (C)[2]  |            |      |
| 861.3963                                       | 861.3744       | -0.0219       | -25           | 531           | 536      | FCPFYK           |                  |          | Carbamidomethyl (C)[2]  |            |      |
| 885.4464                                       | 885.4304       | -0.016        | -18           | 382           | 388      | LASFYER          | 37               | 92.526   |                         |            |      |
| 885.4464                                       | 885.4304       | -0.016        | -18           | 382           | 388      | LASFYER          |                  |          |                         |            |      |
| 888.5302                                       | 888.4813       | -0.0489       | -55           | 565           | 571      | ITWSIIR          |                  |          |                         |            |      |
| 902.5053                                       | 902.4882       | -0.0171       | -19           | 121           | 129      | GVNVSALSR        |                  |          |                         |            |      |
| 902.5053                                       | 902.4882       | -0.0171       | -19           | 121           | 129      | GVNVSALSR        | 29               | 51.633   |                         |            |      |
| 956.5523                                       | 956.5428       | -0.0095       | -10           | 213           | 220      | QVRPVTEK         |                  |          |                         |            |      |
| 956.5523                                       | 956.5428       | -0.0095       | -10           | 213           | 220      | QVRPVTEK         | 20               | 0        |                         |            |      |
| 1016.4571                                      | 1016.4607      | 0.0036        | 4             | 460           | 467      | ALDEYYDK         |                  |          |                         |            |      |
| 1050.4884                                      | 1050.4807      | -0.0077       | -7            | 281           | 289      | GNEMSEVLR        | 1                | 0        | Oxidation (M)[4]        |            |      |
| 1050.4884                                      | 1050.4807      | -0.0077       | -7            | 281           | 289      | GNEMSEVLR        |                  |          | Oxidation (M)[4]        |            |      |
| 1145.6102                                      | 1145.6176      | 0.0074        | 6             | 468           | 476      | HFTEFVPLR        |                  |          |                         |            |      |
| 1145.6102                                      | 1145.6176      | 0.0074        | 6             | 468           | 476      | HFTEFVPLR        | 25               | 0        |                         |            |      |
| 1230.6664                                      | 1230.6661      | -0.0003       | 0             | 203           | 212      | LSMVQWVPVR       |                  |          | Oxidation (M)[3]        |            |      |
| 1262.678                                       | 1262.6617      | -0.0163       | -13           | 130           | 139      | DIKWEFIPSK       |                  |          |                         |            |      |
| 1308.7271                                      | 1308.7423      | 0.0152        | 12            | 45            | 56       | VGHSELVGEIIR     | 29               | 49.702   |                         |            |      |
| 1308.7271                                      | 1308.7423      | 0.0152        | 12            | 45            | 56       | VGHSELVGEIIR     |                  |          |                         |            |      |
| 1316.7434                                      | 1316.7651      | 0.0217        | 16            | 221           | 232      | LPANHPLLTGQR     | 54               | 99.858   |                         |            |      |
| 1316.7434                                      | 1316.7651      | 0.0217        | 16            | 221           | 232      | LPANHPLLTGQR     |                  |          |                         |            |      |
| 1319.655                                       | 1319.7422      | 0.0872        | 66            | 553           | 564      | RAVETTAQSDNK     |                  |          |                         |            |      |
| 1487.8038                                      | 1487.7397      | -0.0641       | -43           | 201           | 212      | EKLSMVQVWPVR     |                  |          | Oxidation (M)[5]        |            |      |
| 1531.7897                                      | 1531.7991      | 0.0094        | 6             | 309           | 323      | TALVANTSNNMPVAAR | 25               | 0        | Oxidation (M)[10]       |            |      |
| 1531.7897                                      | 1531.7991      | 0.0094        | 6             | 309           | 323      | TALVANTSNNMPVAAR |                  |          | Oxidation (M)[10]       |            |      |
| 1588.8792                                      | 1588.8859      | 0.0067        | 4             | 499           | 513      | ASLAETDKITLEVAK  |                  |          |                         |            |      |
| 1588.8792                                      | 1588.8859      | 0.0067        | 4             | 499           | 513      | ASLAETDKITLEVAK  |                  |          |                         |            |      |
| 1731.7609                                      | 1731.8127      | 0.0518        | 30            | 517           | 530      | DDFLQQNGYTPYDR   | 10               | 0        |                         |            |      |
| 1731.8007                                      | 1731.8127      | 0.012         | 7             | 266           | 280      | YSNSDVIIVGCGER   |                  |          | Carbamidomethyl (C)[12] |            |      |
| 1735.672                                       | 1735.7106      | 0.0386        | 22            | 339           | 353      | DMGYHVSMMADSTSR  |                  |          | Oxidation (M)[2,8,9]    |            |      |

|           |           |         |     |     |     |                           |    |       |                       |
|-----------|-----------|---------|-----|-----|-----|---------------------------|----|-------|-----------------------|
| 1735.672  | 1735.7106 | 0.0386  | 22  | 339 | 353 | DMGYHVSMMADSTSR           | 0  | 0     | Oxidation (M)[2,8,9]  |
| 1749.8694 | 1749.8475 | -0.0219 | -13 | 324 | 338 | EASIYTGITLSEYFR           |    |       |                       |
| 1781.8527 | 1781.8738 | 0.0211  | 12  | 365 | 381 | LAEMPADSGYPAYLGAR         |    |       |                       |
| 1797.8475 | 1797.8593 | 0.0118  | 7   | 365 | 381 | LAEMPADSGYPAYLGAR         | 9  | 0     | Oxidation (M)[4]      |
| 1797.8475 | 1797.8593 | 0.0118  | 7   | 365 | 381 | LAEMPADSGYPAYLGAR         |    |       | Oxidation (M)[4]      |
| 1800.8221 | 1800.8468 | 0.0247  | 14  | 599 | 613 | ADYAQLLEDMQNAFR           |    |       | Oxidation (M)[10]     |
| 1800.8221 | 1800.8468 | 0.0247  | 14  | 599 | 613 | ADYAQLLEDMQNAFR           |    |       | Oxidation (M)[10]     |
| 1883.8336 | 1883.8385 | 0.0049  | 3   | 537 | 552 | TVGMLSNMISFYDMAR          |    |       | Oxidation (M)[4,8,14] |
| 2086.0239 | 2086.0422 | 0.0183  | 9   | 514 | 530 | LIKDDFLQQNGYTPYDR         | 34 | 86.21 |                       |
| 2086.0239 | 2086.0422 | 0.0183  | 9   | 514 | 530 | LIKDDFLQQNGYTPYDR         |    |       |                       |
| 2143.0496 | 2143.0613 | 0.0117  | 5   | 460 | 476 | ALDEYYDKHFTEFVPLR         |    |       |                       |
| 2186.145  | 2186.1479 | 0.0029  | 1   | 143 | 163 | VGSHITGGDIYGIVNENSLIK     |    |       |                       |
| 2681.2974 | 2681.2686 | -0.0288 | -11 | 57  | 81  | LEGDMATIQVYEETSGVSVGDPVLR |    |       | Oxidation (M)[5]      |

| Protein Name | Accession No.  | Peptide Count | Protein Score | Protein Score C.I.% | Total Ion Score | Total Ion C.I. % | Best Ion Score | Best Ion C.I.% | % Coverage |      |
|--------------|----------------|---------------|---------------|---------------------|-----------------|------------------|----------------|----------------|------------|------|
| TOAD-64      | emb CAA86981.1 | 15            | 360           | 100                 | 227             |                  | 100            | 51             | 99.731     | 36.5 |

| Calc. Mass | Obsrv. Mass | ± da    | ± ppm | Start Seq. | End Seq. | Sequence              | Ion Score | C. I. % | Modification            |
|------------|-------------|---------|-------|------------|----------|-----------------------|-----------|---------|-------------------------|
| 813.4213   | 813.4722    | 0.0509  | 63    | 57         | 63       | TIEAHSR               |           |         |                         |
| 813.4213   | 813.4722    | 0.0509  | 63    | 57         | 63       | TIEAHSR               | 8         | 0       |                         |
| 908.4988   | 908.526     | 0.0272  | 30    | 391        | 397      | VFNLVPR               |           |         |                         |
| 908.4988   | 908.526     | 0.0272  | 30    | 391        | 397      | VFNLVPR               | 43        | 98.423  |                         |
| 1015.553   | 1015.5582   | 0.0052  | 5     | 259        | 268      | SAAEVIAQAR            |           |         |                         |
| 1015.553   | 1015.5582   | 0.0052  | 5     | 259        | 268      | SAAEVIAQAR            | 30        | 64.705  |                         |
| 1140.6088  | 1140.5836   | -0.0252 | -22   | 472        | 480      | KPFDFVYK              |           |         |                         |
| 1140.6088  | 1140.5836   | -0.0252 | -22   | 472        | 480      | KPFDFVYK              |           |         |                         |
| 1262.6296  | 1262.5825   | -0.0471 | -37   | 147        | 157      | GIQEEMEALVK           |           |         | Oxidation (M)[6]        |
| 1262.6296  | 1262.5825   | -0.0471 | -37   | 147        | 157      | GIQEEMEALVK           |           |         | Oxidation (M)[6]        |
| 1310.6885  | 1310.6313   | -0.0572 | -44   | 64         | 75       | MVIPGGIDVHTR          |           |         | Oxidation (M)[1]        |
| 1310.6885  | 1310.6313   | -0.0572 | -44   | 64         | 75       | MVIPGGIDVHTR          | 11        | 0       | Oxidation (M)[1]        |
| 1323.7631  | 1323.6953   | -0.0678 | -51   | 44         | 56       | QIGENLIVPGGVK         |           |         |                         |
| 1620.7938  | 1620.7201   | -0.0737 | -45   | 497        | 511      | GLYDGPVCEVSVTPK       |           |         | Carbamidomethyl (C)[8]  |
| 1620.7938  | 1620.7201   | -0.0737 | -45   | 497        | 511      | GLYDGPVCEVSVTPK       |           |         | Carbamidomethyl (C)[8]  |
| 1682.8707  | 1682.8064   | -0.0643 | -38   | 452        | 467      | IVLEDGTLHVTGSGR       |           |         |                         |
| 1682.8707  | 1682.8064   | -0.0643 | -38   | 452        | 467      | IVLEDGTLHVTGSGR       | 29        | 58.627  |                         |
| 1741.8062  | 1741.7249   | -0.0813 | -47   | 375        | 390      | MDENQFVAVTSTNAAK      |           |         | Oxidation (M)[1]        |
| 1792.8348  | 1792.7745   | -0.0603 | -34   | 346        | 361      | DNFTLIPEGTNGTEER      | 51        | 99.731  |                         |
| 1792.8348  | 1792.7745   | -0.0603 | -34   | 346        | 361      | DNFTLIPEGTNGTEER      |           |         |                         |
| 1822.9368  | 1822.8663   | -0.0705 | -39   | 239        | 254      | SITIANQTNCPYVTK       |           |         | Carbamidomethyl (C)[10] |
| 2169.0684  | 2169.0642   | -0.0042 | -2    | 533        | 552      | NLHQSGFSLSGAQIDDNIPR  | 24        | 0       |                         |
| 2169.0684  | 2169.0642   | -0.0042 | -2    | 533        | 552      | NLHQSGFSLSGAQIDDNIPR  |           |         |                         |
| 2182.9055  | 2182.9053   | -0.0002 | 0     | 76         | 94       | FQMPDQGMTSADDFQGTK    |           |         | Oxidation (M)[3,8]      |
| 2182.9055  | 2182.9053   | -0.0002 | 0     | 76         | 94       | FQMPDQGMTSADDFQGTK    |           |         | Oxidation (M)[3,8]      |
| 2377.1741  | 2377.2197   | 0.0456  | 19    | 190        | 211      | DIGAIAQVHAENGDIIEEQQR | 31        | 76.465  |                         |
| 2377.1741  | 2377.2197   | 0.0456  | 19    | 190        | 211      | DIGAIAQVHAENGDIIEEQQR |           |         |                         |

| Protein Name                                 | Accession No.  | Peptide Count | Protein Score | Protein Score C.I.% | Total Ion Score | Total Ion C.I. % | Best Ion Score | Best Ion C.I.% | % Coverage |      |
|----------------------------------------------|----------------|---------------|---------------|---------------------|-----------------|------------------|----------------|----------------|------------|------|
| Similar to Dihydropyrimidinase related prote | rf XP_341343.1 | 17            | 264           | 100                 | 138             |                  | 100            | 36             | 89.58      | 36.4 |

| Calc. Mass | Obsrv. Mass | ± da   | ± ppm | Start Seq. | End Seq. | Sequence   | Ion Score | C. I. % | Modification |
|------------|-------------|--------|-------|------------|----------|------------|-----------|---------|--------------|
| 813.4213   | 813.4432    | 0.0219 | 27    | 159        | 165      | TIEAHSR    |           |         |              |
| 908.4988   | 908.5106    | 0.0118 | 13    | 564        | 570      | VFNLVPR    | 36        | 89.58   |              |
| 908.4988   | 908.5106    | 0.0118 | 13    | 564        | 570      | VFNLVPR    |           |         |              |
| 1015.553   | 1015.5703   | 0.0173 | 17    | 432        | 441      | SAAEVIAQAR | 17        | 0       |              |
| 1015.553   | 1015.5703   | 0.0173 | 17    | 432        | 441      | SAAEVIAQAR |           |         |              |
| 1140.6088  | 1140.6245   | 0.0157 | 14    | 645        | 653      | KPFDFVYK   |           |         |              |

|           |           |         |     |     |     |                       |    |        |  |  |                         |
|-----------|-----------|---------|-----|-----|-----|-----------------------|----|--------|--|--|-------------------------|
| 1140.6088 | 1140.6245 | 0.0157  | 14  | 645 | 653 | KPFPDFVYK             |    |        |  |  |                         |
| 1262.6296 | 1262.6533 | 0.0237  | 19  | 320 | 330 | GIQEEMEALVK           |    |        |  |  | Oxidation (M)[6]        |
| 1310.6885 | 1310.7009 | 0.0124  | 9   | 166 | 177 | MVIPGGIDVHTR          |    |        |  |  | Oxidation (M)[1]        |
| 1310.6885 | 1310.7009 | 0.0124  | 9   | 166 | 177 | MVIPGGIDVHTR          |    |        |  |  | Oxidation (M)[1]        |
| 1323.7631 | 1323.7594 | -0.0037 | -3  | 146 | 158 | QIGENLIVPGGVK         |    |        |  |  |                         |
| 1323.7631 | 1323.7594 | -0.0037 | -3  | 146 | 158 | QIGENLIVPGGVK         |    |        |  |  |                         |
| 1385.5977 | 1385.7294 | 0.1317  | 95  | 83  | 92  | HLCEEFTMFR            |    |        |  |  | Oxidation (M)[8]        |
| 1385.5977 | 1385.7294 | 0.1317  | 95  | 83  | 92  | HLCEEFTMFR            |    |        |  |  | Carbamidomethyl (C)[3]  |
| 1643.7886 | 1643.9052 | 0.1166  | 71  | 331 | 344 | DHGVNSFLVYMAFK        |    |        |  |  | Oxidation (M)[11]       |
| 1682.8707 | 1682.892  | 0.0213  | 13  | 625 | 640 | IVLEDGTLHVTEGSGR      | 25 | 0      |  |  |                         |
| 1682.8707 | 1682.892  | 0.0213  | 13  | 625 | 640 | IVLEDGTLHVTEGSGR      |    |        |  |  |                         |
| 1741.8062 | 1741.8083 | 0.0021  | 1   | 548 | 563 | MDENQFVAVTSTNAAK      |    |        |  |  | Oxidation (M)[1]        |
| 1792.8348 | 1792.8491 | 0.0143  | 8   | 519 | 534 | DNFTLIPEGTNGTEER      | 30 | 63.115 |  |  |                         |
| 1792.8348 | 1792.8491 | 0.0143  | 8   | 519 | 534 | DNFTLIPEGTNGTEER      |    |        |  |  |                         |
| 1822.9368 | 1822.9285 | -0.0083 | -5  | 412 | 427 | SITIANQTNCPYVTK       |    |        |  |  | Carbamidomethyl (C)[10] |
| 2169.0684 | 2169.0769 | 0.0085  | 4   | 706 | 725 | NLHQSGFSLSGAQIDDNIPR  |    |        |  |  |                         |
| 2169.1484 | 2169.0769 | -0.0715 | -33 | 62  | 80  | FQTMIVVAEVQSSFASIR    |    |        |  |  |                         |
| 2182.9055 | 2182.9023 | -0.0032 | -1  | 178 | 196 | FQMPDQGMTSADDFQGTGK   |    |        |  |  | Oxidation (M)[3,8]      |
| 2377.1741 | 2377.1692 | -0.0049 | -2  | 363 | 384 | DIGAIAQVHAENGDIIEEQQR |    |        |  |  |                         |
| 2377.1741 | 2377.1692 | -0.0049 | -2  | 363 | 384 | DIGAIAQVHAENGDIIEEQQR | 30 | 57.258 |  |  |                         |

| Protein Name            |  | Accession No.  | Peptide Count | Protein Score | Protein Score |     | Total Ion Score | Total Ion C.I. % | Best Ion Score | Best Ion C.I. % | % Coverage |      |
|-------------------------|--|----------------|---------------|---------------|---------------|-----|-----------------|------------------|----------------|-----------------|------------|------|
| Unnamed protein product |  | emb CAA37654.1 | 11            | 170           | C.I.%         | 100 | 73              |                  | 99.998         | 54              | 99.844     | 25.1 |

| Peptide Information |  | Calc. Mass | Obsrv. Mass | ± da    | ± ppm | Start Seq. | End Seq. | Sequence                  | Ion Score | C. I. % | Modification            |
|---------------------|--|------------|-------------|---------|-------|------------|----------|---------------------------|-----------|---------|-------------------------|
|                     |  | 833.39     | 833.3958    | 0.0058  | 7     | 276        | 283      | APGFGDNR                  | 9         | 0       |                         |
|                     |  | 833.39     | 833.3958    | 0.0058  | 7     | 276        | 283      | APGFGDNR                  |           |         |                         |
|                     |  | 855.4682   | 855.4788    | 0.0106  | 12    | 108        | 115      | GANPVEIR                  |           |         |                         |
|                     |  | 855.4682   | 855.4788    | 0.0106  | 12    | 108        | 115      | GANPVEIR                  | 4         | 0       |                         |
|                     |  | 960.5109   | 960.5321    | 0.0212  | 22    | 395        | 403      | VTDALNATR                 |           |         |                         |
|                     |  | 960.5109   | 960.5321    | 0.0212  | 22    | 395        | 403      | VTDALNATR                 | 19        | 0       |                         |
|                     |  | 961.4849   | 961.5207    | 0.0358  | 37    | 276        | 284      | APGFGDNRK                 |           |         |                         |
|                     |  | 961.4849   | 961.5207    | 0.0358  | 37    | 276        | 284      | APGFGDNRK                 |           |         |                         |
|                     |  | 1215.658   | 1215.6681   | 0.0101  | 8     | 456        | 467      | NAGVEGSLIVEK              |           |         |                         |
|                     |  | 1520.7512  | 1520.7644   | 0.0132  | 9     | 180        | 192      | TLNDELEIIEGMK             |           |         | Oxidation (M)[12]       |
|                     |  | 1520.7512  | 1520.7644   | 0.0132  | 9     | 180        | 192      | TLNDELEIIEGMK             |           |         | Oxidation (M)[12]       |
|                     |  | 1684.905   | 1684.9344   | 0.0294  | 17    | 404        | 420      | AAVEEGIVLGGGCALLR         |           |         | Carbamidomethyl (C)[13] |
|                     |  | 1684.905   | 1684.9344   | 0.0294  | 17    | 404        | 420      | AAVEEGIVLGGGCALLR         |           |         | Carbamidomethyl (C)[13] |
|                     |  | 1798.9004  | 1798.9076   | 0.0072  | 4     | 421        | 436      | CIPALDSLKPANEDQK          |           |         | Carbamidomethyl (C)[1]  |
|                     |  | 1798.9004  | 1798.9076   | 0.0072  | 4     | 421        | 436      | CIPALDSLKPANEDQK          |           |         | Carbamidomethyl (C)[1]  |
|                     |  | 1905.0552  | 1905.0831   | 0.0279  | 15    | 225        | 242      | ISSVQSIVPALEIANHR         |           |         |                         |
|                     |  | 1905.0552  | 1905.0831   | 0.0279  | 15    | 225        | 242      | ISSVQSIVPALEIANHR         |           |         |                         |
|                     |  | 2040.002   | 2040        | -0.002  | -1    | 345        | 361      | IQEITEQLDITTSEYEK         |           |         |                         |
|                     |  | 2040.002   | 2040        | -0.002  | -1    | 345        | 361      | IQEITEQLDITTSEYEK         |           |         |                         |
|                     |  | 2560.2485  | 2560.2192   | -0.0293 | -11   | 71         | 95       | LVQDVANNTNEEAGDGTTTATVLAR | 54        | 99.844  |                         |
|                     |  | 2560.2485  | 2560.2192   | -0.0293 | -11   | 71         | 95       | LVQDVANNTNEEAGDGTTTATVLAR |           |         |                         |

| Protein Name                             |  | Accession No. | Peptide Count | Protein Score | Protein Score |        | Total Ion Score | Total Ion C.I. % | Best Ion Score | Best Ion C.I. % | % Coverage |      |
|------------------------------------------|--|---------------|---------------|---------------|---------------|--------|-----------------|------------------|----------------|-----------------|------------|------|
| Protein disulfide isomerase A3 precursor |  | spt P11598    | 7             | 84            | C.I.%         | 99.988 | 8               |                  | 0              | 8               | 0          | 15.2 |

| Peptide Information |  | Calc. Mass | Obsrv. Mass | ± da   | ± ppm | Start Seq. | End Seq. | Sequence   | Ion Score | C. I. % | Modification     |
|---------------------|--|------------|-------------|--------|-------|------------|----------|------------|-----------|---------|------------------|
|                     |  | Calc. Mass | 877.5094    | 0.0204 | 23    | 297        | 304      | LNFVASR    |           |         |                  |
|                     |  | 995.5632   | 995.5892    | 0.026  | 26    | 131        | 140      | QAGPASVPLR |           |         |                  |
|                     |  | 995.5632   | 995.5892    | 0.026  | 26    | 131        | 140      | QAGPASVPLR |           |         |                  |
|                     |  | 1188.5354  | 1188.5471   | 0.0117 | 10    | 336        | 344      | FVMQEEFSR  |           |         | Oxidation (M)[3] |
|                     |  | 1188.5354  | 1188.5471   | 0.0117 | 10    | 336        | 344      | FVMQEEFSR  |           |         | Oxidation (M)[3] |



|           |           |        |    |     |     |               |
|-----------|-----------|--------|----|-----|-----|---------------|
| 1191.6005 | 1191.6256 | 0.0251 | 21 | 63  | 73  | LAPEYEEAATR   |
| 1191.6005 | 1191.6256 | 0.0251 | 21 | 63  | 73  | LAPEYEEAATR   |
| 1236.5127 | 1236.5421 | 0.0294 | 24 | 108 | 119 | DGEEAGAYDGPR  |
| 1236.5127 | 1236.5421 | 0.0294 | 24 | 108 | 119 | DGEEAGAYDGPR  |
| 1396.6954 | 1396.6975 | 0.0021 | 2  | 367 | 379 | SEPIPETNEGPVK |
| 1593.8483 | 1593.8623 | 0.014  | 9  | 483 | 496 | EATNPPIQEEKPK |

8 0

| Protein Name                             | Accession No. | Peptide Count | Protein Score | Protein Score |                 | Total Ion Score | Total Ion C.I. % | Best Ion Score | Best Ion C.I. % | % Coverage |
|------------------------------------------|---------------|---------------|---------------|---------------|-----------------|-----------------|------------------|----------------|-----------------|------------|
|                                          |               |               |               | C.I. %        | Total Ion Score |                 |                  |                |                 |            |
| Protein disulfide isomerase A3 precursor | spt P11598    | 8             | 108           | 100           | 40              | 97.354          | 21               | 0              | 18.8            |            |

| Peptide Information |             |         |       |            |          |                 |           |         |                  |  |
|---------------------|-------------|---------|-------|------------|----------|-----------------|-----------|---------|------------------|--|
| Calc. Mass          | Obsrv. Mass | ± da    | ± ppm | Start Seq. | End Seq. | Sequence        | Ion Score | C. I. % | Modification     |  |
| 877.489             | 877.4795    | -0.0095 | -11   | 297        | 304      | LNFAVASR        |           |         |                  |  |
| 877.489             | 877.4795    | -0.0095 | -11   | 297        | 304      | LNFAVASR        |           |         |                  |  |
| 995.5632            | 995.5597    | -0.0035 | -4    | 131        | 140      | QAGPASVPLR      | 10        | 0       |                  |  |
| 995.5632            | 995.5597    | -0.0035 | -4    | 131        | 140      | QAGPASVPLR      |           |         |                  |  |
| 1188.5354           | 1188.5244   | -0.011  | -9    | 336        | 344      | FVMQEEFSR       |           |         | Oxidation (M)[3] |  |
| 1188.5354           | 1188.5244   | -0.011  | -9    | 336        | 344      | FVMQEEFSR       |           |         | Oxidation (M)[3] |  |
| 1191.6005           | 1191.5995   | -0.001  | -1    | 63         | 73       | LAPEYEEAATR     | 19        | 0       |                  |  |
| 1191.6005           | 1191.5995   | -0.001  | -1    | 63         | 73       | LAPEYEEAATR     |           |         |                  |  |
| 1236.5127           | 1236.52     | 0.0073  | 6     | 108        | 119      | DGEEAGAYDGPR    | 21        | 0       |                  |  |
| 1236.5127           | 1236.52     | 0.0073  | 6     | 108        | 119      | DGEEAGAYDGPR    |           |         |                  |  |
| 1396.6954           | 1396.6801   | -0.0153 | -11   | 367        | 379      | SEPIPETNEGPVK   |           |         |                  |  |
| 1396.6954           | 1396.6801   | -0.0153 | -11   | 367        | 379      | SEPIPETNEGPVK   |           |         |                  |  |
| 1593.8483           | 1593.8329   | -0.0154 | -10   | 483        | 496      | EATNPPIQEEKPK   |           |         |                  |  |
| 1593.8483           | 1593.8329   | -0.0154 | -10   | 483        | 496      | EATNPPIQEEKPK   |           |         |                  |  |
| 1652.7472           | 1652.7111   | -0.0361 | -22   | 434        | 448      | MDATANDVPSPYEVK |           |         | Oxidation (M)[1] |  |

| Protein Name                             | Accession No. | Peptide Count | Protein Score | Protein Score |                 | Total Ion Score | Total Ion C.I. % | Best Ion Score | Best Ion C.I. % | % Coverage |
|------------------------------------------|---------------|---------------|---------------|---------------|-----------------|-----------------|------------------|----------------|-----------------|------------|
|                                          |               |               |               | C.I. %        | Total Ion Score |                 |                  |                |                 |            |
| Protein disulfide isomerase A3 precursor | spt P11598    | 16            | 266           | 100           | 87              | 100             | 33               | 81.583         | 32.1            |            |

| Peptide Information |             |         |       |            |          |               |           |         |                           |  |
|---------------------|-------------|---------|-------|------------|----------|---------------|-----------|---------|---------------------------|--|
| Calc. Mass          | Obsrv. Mass | ± da    | ± ppm | Start Seq. | End Seq. | Sequence      | Ion Score | C. I. % | Modification              |  |
| 877.489             | 877.4428    | -0.0462 | -53   | 297        | 304      | LNFAVASR      |           |         |                           |  |
| 877.489             | 877.4428    | -0.0462 | -53   | 297        | 304      | LNFAVASR      | 16        | 0       |                           |  |
| 995.5632            | 995.537     | -0.0262 | -26   | 131        | 140      | QAGPASVPLR    | 10        | 0       |                           |  |
| 995.5632            | 995.537     | -0.0262 | -26   | 131        | 140      | QAGPASVPLR    |           |         |                           |  |
| 997.5101            | 997.5075    | -0.0026 | -3    | 153        | 161      | DASVVGFFR     | 8         | 0       |                           |  |
| 997.5101            | 997.5075    | -0.0026 | -3    | 153        | 161      | DASVVGFFR     |           |         |                           |  |
| 1188.5354           | 1188.5184   | -0.017  | -14   | 336        | 344      | FVMQEEFSR     |           |         | Oxidation (M)[3]          |  |
| 1188.5354           | 1188.5184   | -0.017  | -14   | 336        | 344      | FVMQEEFSR     | 1         | 0       | Oxidation (M)[3]          |  |
| 1191.6005           | 1191.5948   | -0.0057 | -5    | 63         | 73       | LAPEYEEAATR   |           |         |                           |  |
| 1191.6005           | 1191.5948   | -0.0057 | -5    | 63         | 73       | LAPEYEEAATR   | 33        | 81.583  |                           |  |
| 1236.5127           | 1236.514    | 0.0013  | 1     | 108        | 119      | DGEEAGAYDGPR  |           |         |                           |  |
| 1236.5127           | 1236.514    | 0.0013  | 1     | 108        | 119      | DGEEAGAYDGPR  | 26        | 0       |                           |  |
| 1244.6633           | 1244.6436   | -0.0197 | -16   | 184        | 194      | FAHTNVELVK    |           |         |                           |  |
| 1244.6633           | 1244.6436   | -0.0197 | -16   | 184        | 194      | FAHTNVELVK    |           |         |                           |  |
| 1373.6736           | 1373.6689   | -0.0047 | -3    | 352        | 362      | FLQEYFDGNLK   |           |         |                           |  |
| 1373.6736           | 1373.6689   | -0.0047 | -3    | 352        | 362      | FLQEYFDGNLK   |           |         |                           |  |
| 1394.6587           | 1394.6573   | -0.0014 | -1    | 162        | 173      | DLFSDGHSEFLK  |           |         |                           |  |
| 1396.6954           | 1396.6891   | -0.0063 | -5    | 367        | 379      | SEPIPETNEGPVK |           |         |                           |  |
| 1396.6954           | 1396.6891   | -0.0063 | -5    | 367        | 379      | SEPIPETNEGPVK |           |         |                           |  |
| 1397.5784           | 1397.698    | 0.1196  | 86    | 83         | 94       | VDCTANTNTCNK  |           |         | Carbamidomethyl (C)[3,10] |  |
| 1397.7059           | 1397.698    | -0.0079 | -6    | 472        | 482      | ELNDFISYLQR   |           |         |                           |  |
| 1529.7747           | 1529.7203   | -0.0544 | -36   | 352        | 363      | FLQEYFDGNLKR  |           |         |                           |  |
| 1529.7747           | 1529.7203   | -0.0544 | -36   | 352        | 363      | FLQEYFDGNLKR  |           |         |                           |  |
| 1593.8483           | 1593.8483   | 0       | 0     | 483        | 496      | EATNPPIQEEKPK |           |         |                           |  |
| 1593.8483           | 1593.8483   | 0       | 0     | 483        | 496      | EATNPPIQEEKPK |           |         |                           |  |

|           |           |         |     |     |     |                 |    |   |  |                  |
|-----------|-----------|---------|-----|-----|-----|-----------------|----|---|--|------------------|
| 1652.7472 | 1652.7423 | -0.0049 | -3  | 434 | 448 | MDATANDVPSPYEVK |    |   |  | Oxidation (M)[1] |
| 1652.7662 | 1652.7423 | -0.0239 | -14 | 105 | 119 | IFRDGEEAGAYDGPR | 13 | 0 |  |                  |

| Protein Name                                 | Accession No.  | Peptide Count | Protein Score | Protein Score |  | Total Ion Score | Total Ion C.I. % | Best Ion Score | Best Ion C.I. % | % Coverage |      |
|----------------------------------------------|----------------|---------------|---------------|---------------|--|-----------------|------------------|----------------|-----------------|------------|------|
| Guanosine diphosphate dissociation inhibitor | rfjNP_058784.1 | 14            | 244           | C.I. %        |  | 100             | 120              | 100            | 36              | 95.079     | 33.8 |

| Peptide Information | Calc. Mass | Obsrv. Mass | ± da    | ± ppm | Start Seq. | End Seq. | Sequence          | Ion Score | C. I. % | Modification           |
|---------------------|------------|-------------|---------|-------|------------|----------|-------------------|-----------|---------|------------------------|
|                     | 938.4941   | 938.5244    | 0.0303  | 32    | 211        | 218      | LYSESLAR          | 36        | 95.079  |                        |
|                     | 938.4941   | 938.5244    | 0.0303  | 32    | 211        | 218      | LYSESLAR          |           |         |                        |
|                     | 1027.5458  | 1027.5732   | 0.0274  | 27    | 104        | 112      | VVEGSFVYK         |           |         |                        |
|                     | 1027.5458  | 1027.5732   | 0.0274  | 27    | 104        | 112      | VVEGSFVYK         |           |         |                        |
|                     | 1136.6133  | 1136.6481   | 0.0348  | 31    | 80         | 89       | FLMANGQLVK        |           |         | Oxidation (M)[3]       |
|                     | 1141.5922  | 1141.6165   | 0.0243  | 21    | 90         | 98       | MLLYTEVTR         |           |         | Oxidation (M)[1]       |
|                     | 1141.5922  | 1141.6165   | 0.0243  | 21    | 90         | 98       | MLLYTEVTR         | 2         | 0       | Oxidation (M)[1]       |
|                     | 1250.5647  | 1250.5983   | 0.0336  | 27    | 437        | 447      | KQNDVFGESADQ      |           |         |                        |
|                     | 1379.5605  | 1379.5858   | 0.0253  | 18    | 424        | 435      | MAGSAFDFENMK      |           |         | Oxidation (M)[1,11]    |
|                     | 1460.7202  | 1460.7483   | 0.0281  | 19    | 56         | 68       | FQLLEGPPESMGR     |           |         |                        |
|                     | 1476.7152  | 1476.7488   | 0.0336  | 23    | 279        | 290      | QLICDPSYIPDR      |           |         | Carbamidomethyl (C)[4] |
|                     | 1476.7152  | 1476.7488   | 0.0336  | 23    | 279        | 290      | QLICDPSYIPDR      | 20        | 0       | Carbamidomethyl (C)[4] |
|                     | 1484.6686  | 1484.6938   | 0.0252  | 17    | 157        | 169      | TFEGVDPQTTSMR     |           |         | Oxidation (M)[12]      |
|                     | 1484.6686  | 1484.6938   | 0.0252  | 17    | 157        | 169      | TFEGVDPQTTSMR     |           |         | Oxidation (M)[12]      |
|                     | 1535.6617  | 1535.6849   | 0.0232  | 15    | 424        | 436      | MAGSAFDFENMKR     | 6         | 0       | Oxidation (M)[1,11]    |
|                     | 1535.6617  | 1535.6849   | 0.0232  | 15    | 424        | 436      | MAGSAFDFENMKR     |           |         | Oxidation (M)[1,11]    |
|                     | 1722.8796  | 1722.9043   | 0.0247  | 14    | 349        | 364      | YIAIASTTVETAPEK   |           |         |                        |
|                     | 1722.916   | 1722.9043   | -0.0117 | -7    | 365        | 379      | EVEPALELLEPIDQK   |           |         |                        |
|                     | 1852.8383  | 1852.8812   | 0.0429  | 23    | 194        | 208      | TDDYLDQPCLETINR   | 30        | 77.35   | Carbamidomethyl (C)[9] |
|                     | 1852.8383  | 1852.8812   | 0.0429  | 23    | 194        | 208      | TDDYLDQPCLETINR   |           |         | Carbamidomethyl (C)[9] |
|                     | 2199.0571  | 2199.1074   | 0.0503  | 23    | 310        | 328      | NTNDANSCQIIPQNVNR |           |         | Carbamidomethyl (C)[8] |
|                     | 2199.0571  | 2199.1074   | 0.0503  | 23    | 310        | 328      | NTNDANSCQIIPQNVNR | 34        | 91.833  | Carbamidomethyl (C)[8] |

| Protein Name                         | Accession No. | Peptide Count | Protein Score | Protein Score |  | Total Ion Score | Total Ion C.I. % | Best Ion Score | Best Ion C.I. % | % Coverage |      |
|--------------------------------------|---------------|---------------|---------------|---------------|--|-----------------|------------------|----------------|-----------------|------------|------|
| RAB GDP dissociation inhibitor alpha | spt P50398    | 18            | 296           | C.I. %        |  | 100             | 140              | 100            | 35              | 91.74      | 42.7 |

| Peptide Information | Calc. Mass | Obsrv. Mass | ± da    | ± ppm | Start Seq. | End Seq. | Sequence        | Ion Score | C. I. % | Modification           |
|---------------------|------------|-------------|---------|-------|------------|----------|-----------------|-----------|---------|------------------------|
|                     | 938.4941   | 938.4952    | 0.0011  | 1     | 211        | 218      | LYSESLAR        | 32        | 85.941  |                        |
|                     | 938.4941   | 938.4952    | 0.0011  | 1     | 211        | 218      | LYSESLAR        |           |         |                        |
|                     | 1027.5458  | 1027.5322   | -0.0136 | -13   | 104        | 112      | VVEGSFVYK       |           |         |                        |
|                     | 1027.5458  | 1027.5322   | -0.0136 | -13   | 104        | 112      | VVEGSFVYK       | 24        | 0       |                        |
|                     | 1136.6133  | 1136.5911   | -0.0222 | -20   | 80         | 89       | FLMANGQLVK      |           |         | Oxidation (M)[3]       |
|                     | 1136.6133  | 1136.5911   | -0.0222 | -20   | 80         | 89       | FLMANGQLVK      |           |         | Oxidation (M)[3]       |
|                     | 1141.5922  | 1141.5731   | -0.0191 | -17   | 90         | 98       | MLLYTEVTR       |           |         | Oxidation (M)[1]       |
|                     | 1141.5922  | 1141.5731   | -0.0191 | -17   | 90         | 98       | MLLYTEVTR       | 3         | 0       | Oxidation (M)[1]       |
|                     | 1250.5647  | 1250.5435   | -0.0212 | -17   | 437        | 447      | KQNDVFGESADQ    |           |         |                        |
|                     | 1250.5647  | 1250.5435   | -0.0212 | -17   | 437        | 447      | KQNDVFGESADQ    |           |         |                        |
|                     | 1476.7151  | 1476.6958   | -0.0193 | -13   | 56         | 68       | FQLLEGPPESMGR   |           |         | Oxidation (M)[11]      |
|                     | 1476.7152  | 1476.6958   | -0.0194 | -13   | 279        | 290      | QLICDPSYIPDR    | 21        | 0       | Carbamidomethyl (C)[4] |
|                     | 1484.6686  | 1484.6403   | -0.0283 | -19   | 157        | 169      | TFEGVDPQTTSMR   |           |         | Oxidation (M)[12]      |
|                     | 1484.6686  | 1484.6403   | -0.0283 | -19   | 157        | 169      | TFEGVDPQTTSMR   |           |         | Oxidation (M)[12]      |
|                     | 1535.6617  | 1535.6304   | -0.0313 | -20   | 423        | 435      | RMAGSAFDFENMK   |           |         | Oxidation (M)[2,12]    |
|                     | 1535.6617  | 1535.6304   | -0.0313 | -20   | 424        | 436      | MAGSAFDFENMKR   |           |         | Oxidation (M)[1,11]    |
|                     | 1654.8112  | 1654.7833   | -0.0279 | -17   | 143        | 156      | FLVFNANFDENDPK  |           |         |                        |
|                     | 1722.8796  | 1722.8535   | -0.0261 | -15   | 349        | 364      | YIAIASTTVETAPEK |           |         |                        |
|                     | 1722.8796  | 1722.8535   | -0.0261 | -15   | 349        | 364      | YIAIASTTVETAPEK |           |         |                        |
|                     | 1791.9349  | 1791.7239   | -0.211  | -118  | 90         | 103      | MLLYTEVTRYLDFK  |           |         |                        |
|                     | 1852.8383  | 1852.8303   | -0.008  | -4    | 194        | 208      | TDDYLDQPCLETINR | 29        | 69.028  | Carbamidomethyl (C)[9] |
|                     | 1852.8383  | 1852.8303   | -0.008  | -4    | 194        | 208      | TDDYLDQPCLETINR |           |         | Carbamidomethyl (C)[9] |

|           |           |         |    |     |     |                      |                                 |
|-----------|-----------|---------|----|-----|-----|----------------------|---------------------------------|
| 2086.967  | 2086.9583 | -0.0087 | -4 | 119 | 137 | VPSTETEALASNLGMFKEK  | Oxidation (M)[14,16]            |
| 2086.967  | 2086.9583 | -0.0087 | -4 | 119 | 137 | VPSTETEALASNLGMFKEK  | Oxidation (M)[14,16]            |
| 2147.0178 | 2147.011  | -0.0068 | -3 | 36  | 54  | NPYYGGESSITPLEELYK   |                                 |
| 2147.0178 | 2147.011  | -0.0068 | -3 | 36  | 54  | NPYYGGESSITPLEELYK   |                                 |
| 2199.0571 | 2199.0669 | 0.0098  | 4  | 310 | 328 | NTNDANSCQIIPQNVNR    | 35 91.74 Carbamidomethyl (C)[8] |
| 2199.0571 | 2199.0669 | 0.0098  | 4  | 310 | 328 | NTNDANSCQIIPQNVNR    | Carbamidomethyl (C)[8]          |
| 2271.0896 | 2271.0923 | 0.0027  | 1  | 329 | 348 | KSDIYVCMISYAHNVAAGGK | Carbamidomethyl (C)[7]          |
| 2271.0896 | 2271.0923 | 0.0027  | 1  | 329 | 348 | KSDIYVCMISYAHNVAAGGK | Oxidation (M)[8]                |

| Protein Name            | Accession No.  | Peptide Count | Protein Score | Protein Score |     | Total Ion Score | Total Ion C.I. % | Best Ion Score | Best Ion C.I. % | % Coverage |
|-------------------------|----------------|---------------|---------------|---------------|-----|-----------------|------------------|----------------|-----------------|------------|
| Unnamed protein product | emb CAA37654.1 | 8             | 138           | C.I.%         | 100 | 53              |                  | 99.827         | 38              | 20.6       |

| Peptide Information | Calc. Mass | Obsrv. Mass | ± da   | ± ppm | Start Seq. | End Seq. | Sequence               | Ion Score | C. I. % | Modification            |
|---------------------|------------|-------------|--------|-------|------------|----------|------------------------|-----------|---------|-------------------------|
|                     | 833.39     | 833.4198    | 0.0298 | 36    | 276        | 283      | APGFGDNR               | 14        | 0       |                         |
|                     | 833.39     | 833.4198    | 0.0298 | 36    | 276        | 283      | APGFGDNR               |           |         |                         |
|                     | 855.4682   | 855.4999    | 0.0317 | 37    | 108        | 115      | GANPVEIR               | 12        | 0       |                         |
|                     | 855.4682   | 855.4999    | 0.0317 | 37    | 108        | 115      | GANPVEIR               |           |         |                         |
|                     | 960.5109   | 960.5518    | 0.0409 | 43    | 395        | 403      | VTDALNATR              |           |         |                         |
|                     | 960.5109   | 960.5518    | 0.0409 | 43    | 395        | 403      | VTDALNATR              |           |         |                         |
|                     | 1684.905   | 1684.9502   | 0.0452 | 27    | 404        | 420      | AAVEEGIVLGGGCALLR      |           |         | Carbamidomethyl (C)[13] |
|                     | 1684.905   | 1684.9502   | 0.0452 | 27    | 404        | 420      | AAVEEGIVLGGGCALLR      |           |         | Carbamidomethyl (C)[13] |
|                     | 1798.9004  | 1798.9209   | 0.0205 | 11    | 421        | 436      | CIPALDSLKPANEDQK       |           |         | Carbamidomethyl (C)[1]  |
|                     | 1798.9004  | 1798.9209   | 0.0205 | 11    | 421        | 436      | CIPALDSLKPANEDQK       |           |         | Carbamidomethyl (C)[1]  |
|                     | 1905.0552  | 1905.1051   | 0.0499 | 26    | 225        | 242      | ISSVQSIIVPALEIANAHR    |           |         |                         |
|                     | 1905.0552  | 1905.1051   | 0.0499 | 26    | 225        | 242      | ISSVQSIIVPALEIANAHR    |           |         |                         |
|                     | 2040.002   | 2040.0284   | 0.0264 | 13    | 345        | 361      | IQEITEQLDITTESEYEK     |           |         |                         |
|                     | 2040.002   | 2040.0284   | 0.0264 | 13    | 345        | 361      | IQEITEQLDITTESEYEK     |           |         |                         |
|                     | 2560.2485  | 2560.3022   | 0.0537 | 21    | 71         | 95       | LVQDVANNTNEEAGDGTATVLR |           |         |                         |
|                     | 2560.2485  | 2560.3022   | 0.0537 | 21    | 71         | 95       | LVQDVANNTNEEAGDGTATVLR | 38        | 95.325  |                         |

| Protein Name            | Accession No.  | Peptide Count | Protein Score | Protein Score |     | Total Ion Score | Total Ion C.I. % | Best Ion Score | Best Ion C.I. % | % Coverage |
|-------------------------|----------------|---------------|---------------|---------------|-----|-----------------|------------------|----------------|-----------------|------------|
| Unnamed protein product | emb CAA37654.1 | 9             | 138           | C.I.%         | 100 | 24              |                  | 0              | 24              | 20.8       |

| Peptide Information | Calc. Mass | Obsrv. Mass | ± da    | ± ppm | Start Seq. | End Seq. | Sequence               | Ion Score | C. I. % | Modification            |
|---------------------|------------|-------------|---------|-------|------------|----------|------------------------|-----------|---------|-------------------------|
|                     | 833.39     | 833.3965    | 0.0065  | 8     | 276        | 283      | APGFGDNR               | 10        | 0       |                         |
|                     | 833.39     | 833.3965    | 0.0065  | 8     | 276        | 283      | APGFGDNR               |           |         |                         |
|                     | 855.4682   | 855.4759    | 0.0077  | 9     | 108        | 115      | GANPVEIR               |           |         |                         |
|                     | 855.4682   | 855.4759    | 0.0077  | 9     | 108        | 115      | GANPVEIR               | 4         | 0       |                         |
|                     | 960.5109   | 960.524     | 0.0131  | 14    | 395        | 403      | VTDALNATR              |           |         |                         |
|                     | 960.5109   | 960.524     | 0.0131  | 14    | 395        | 403      | VTDALNATR              |           |         |                         |
|                     | 961.4849   | 961.5095    | 0.0246  | 26    | 276        | 284      | APGFGDNRK              |           |         |                         |
|                     | 1684.905   | 1684.9135   | 0.0085  | 5     | 404        | 420      | AAVEEGIVLGGGCALLR      |           |         | Carbamidomethyl (C)[13] |
|                     | 1798.9004  | 1798.8812   | -0.0192 | -11   | 421        | 436      | CIPALDSLKPANEDQK       |           |         | Carbamidomethyl (C)[1]  |
|                     | 1905.0552  | 1905.0764   | 0.0212  | 11    | 225        | 242      | ISSVQSIIVPALEIANAHR    |           |         |                         |
|                     | 1905.0552  | 1905.0764   | 0.0212  | 11    | 225        | 242      | ISSVQSIIVPALEIANAHR    |           |         |                         |
|                     | 2040.002   | 2040.0042   | 0.0022  | 1     | 345        | 361      | IQEITEQLDITTESEYEK     |           |         |                         |
|                     | 2040.002   | 2040.0042   | 0.0022  | 1     | 345        | 361      | IQEITEQLDITTESEYEK     |           |         |                         |
|                     | 2560.2485  | 2560.2559   | 0.0074  | 3     | 71         | 95       | LVQDVANNTNEEAGDGTATVLR |           |         |                         |
|                     | 2560.2485  | 2560.2559   | 0.0074  | 3     | 71         | 95       | LVQDVANNTNEEAGDGTATVLR | 24        | 0       |                         |

| Protein Name                                | Accession No. | Peptide Count | Protein Score | Protein Score |     | Total Ion Score | Total Ion C.I. % | Best Ion Score | Best Ion C.I. % | % Coverage |
|---------------------------------------------|---------------|---------------|---------------|---------------|-----|-----------------|------------------|----------------|-----------------|------------|
| Dihydropyrimidinase related protein-2 (DRP) | spt P47942    | 7             | 129           | C.I.%         | 100 | 63              |                  | 99.984         | 27              | 14.7       |

| Peptide Information | Calc. Mass | Obsrv. Mass | ± da   | ± ppm | Start Seq. | End Seq. | Sequence | Ion Score | C. I. % | Modification |
|---------------------|------------|-------------|--------|-------|------------|----------|----------|-----------|---------|--------------|
|                     | 813.4213   | 813.4661    | 0.0448 | 55    | 57         | 63       | TIEAHSR  |           |         |              |

|           |           |        |    |     |     |                  |    |        |                  |
|-----------|-----------|--------|----|-----|-----|------------------|----|--------|------------------|
| 908.4988  | 908.528   | 0.0292 | 32 | 391 | 397 | VFNLVPR          | 27 | 32.073 |                  |
| 908.4988  | 908.528   | 0.0292 | 32 | 391 | 397 | VFNLVPR          |    |        |                  |
| 1015.553  | 1015.5897 | 0.0367 | 36 | 259 | 268 | SAAEVIAQAR       | 22 | 0      |                  |
| 1015.553  | 1015.5897 | 0.0367 | 36 | 259 | 268 | SAAEVIAQAR       |    |        |                  |
| 1310.6885 | 1310.7214 | 0.0329 | 25 | 64  | 75  | MVPGGIDVHTR      |    |        | Oxidation (M)[1] |
| 1310.6885 | 1310.7214 | 0.0329 | 25 | 64  | 75  | MVPGGIDVHTR      |    |        | Oxidation (M)[1] |
| 1682.8707 | 1682.9238 | 0.0531 | 32 | 452 | 467 | IVLEDGTLHVTEGSGR |    |        |                  |
| 1682.8707 | 1682.9238 | 0.0531 | 32 | 452 | 467 | IVLEDGTLHVTEGSGR | 4  | 0      |                  |
| 1741.8062 | 1741.8464 | 0.0402 | 23 | 375 | 390 | MDENQFVAVTSTNAAK |    |        | Oxidation (M)[1] |
| 1792.8348 | 1792.8777 | 0.0429 | 24 | 346 | 361 | DNFTLIPEGTNGTEER | 15 | 0      |                  |
| 1792.8348 | 1792.8777 | 0.0429 | 24 | 346 | 361 | DNFTLIPEGTNGTEER |    |        |                  |

| Protein Name                              | Accession No. | Peptide Count | Protein Score | Protein Score C.I.% | Total Ion Score | Total Ion C.I. % | Best Ion Score | Best Ion C.I.% | % Coverage |
|-------------------------------------------|---------------|---------------|---------------|---------------------|-----------------|------------------|----------------|----------------|------------|
| Mitochondrial aldehyde dehydrogenase (Fra | trm Q8K3V8    | 6             | 69            | 99.633              | 14              |                  | 0              | 14             | 16.2       |

| Peptide Information | Calc. Mass | Obsrv. Mass | ± da    | ± ppm | Start Seq. | End Seq. | Sequence                       | Ion Score | C. I. % | Modification      |
|---------------------|------------|-------------|---------|-------|------------|----------|--------------------------------|-----------|---------|-------------------|
|                     | 829.4777   | 829.451     | -0.0267 | -32   | 79         | 85       | LADLIER                        |           |         |                   |
|                     | 902.4941   | 902.4804    | -0.0137 | -15   | 400        | 407      | TIEEVVGR                       | 9         | 0       |                   |
|                     | 902.4941   | 902.4804    | -0.0137 | -15   | 400        | 407      | TIEEVVGR                       |           |         |                   |
|                     | 990.5002   | 990.5001    | -0.0001 | 0     | 318        | 326      | VVGNPFDSR                      |           |         |                   |
|                     | 990.5002   | 990.5001    | -0.0001 | 0     | 318        | 326      | VVGNPFDSR                      | 14        | 0       |                   |
|                     | 1470.7627  | 1470.6606   | -0.1021 | -69   | 366        | 378      | GYFIQPTVFGDVK                  |           |         |                   |
|                     | 1470.7627  | 1470.6606   | -0.1021 | -69   | 366        | 378      | GYFIQPTVFGDVK                  |           |         |                   |
|                     | 1506.707   | 1506.7119   | 0.0049  | 3     | 327        | 339      | TEQGPQVDETQFK                  |           |         |                   |
|                     | 1506.707   | 1506.7119   | 0.0049  | 3     | 327        | 339      | TEQGPQVDETQFK                  |           |         |                   |
|                     | 3210.8169  | 3210.5295   | -0.2874 | -90   | 167        | 197      | LGPALATGNVVMKVAEQTPLTALYVANLIK |           |         | Oxidation (M)[13] |

| Protein Name                              | Accession No. | Peptide Count | Protein Score | Protein Score C.I.% | Total Ion Score | Total Ion C.I. % | Best Ion Score | Best Ion C.I.% | % Coverage |
|-------------------------------------------|---------------|---------------|---------------|---------------------|-----------------|------------------|----------------|----------------|------------|
| ATPase, H transporting, lysosomal V1 subu | gij16758754   | 16            | 365           | 100                 | 200             |                  | 100            | 57             | 35.4       |

| Peptide Information | Calc. Mass | Obsrv. Mass | ± da   | ± ppm | Start Seq. | End Seq. | Sequence                | Ion Score | C. I. % | Modification           |
|---------------------|------------|-------------|--------|-------|------------|----------|-------------------------|-----------|---------|------------------------|
|                     | 873.4788   | 873.5059    | 0.0271 | 31    | 30         | 37       | EQALAVSR                |           |         |                        |
|                     | 873.4788   | 873.5059    | 0.0271 | 31    | 30         | 37       | EQALAVSR                | 3         | 0       |                        |
|                     | 877.4526   | 877.4846    | 0.032  | 36    | 38         | 44       | NYLSQPR                 |           |         |                        |
|                     | 877.4526   | 877.4846    | 0.032  | 36    | 38         | 44       | NYLSQPR                 | 33        | 79.614  |                        |
|                     | 937.4407   | 937.47      | 0.0293 | 31    | 404        | 412      | SAIGEGMTR               |           |         | Oxidation (M)[7]       |
|                     | 1120.5303  | 1120.5637   | 0.0334 | 30    | 121        | 130      | TPVSEDMLGR              |           |         | Oxidation (M)[7]       |
|                     | 1120.5303  | 1120.5637   | 0.0334 | 30    | 121        | 130      | TPVSEDMLGR              | 23        | 0       | Oxidation (M)[7]       |
|                     | 1189.6323  | 1189.6775   | 0.0452 | 38    | 131        | 141      | VFNGSGKPIDR             |           |         |                        |
|                     | 1189.6323  | 1189.6775   | 0.0452 | 38    | 131        | 141      | VFNGSGKPIDR             | 33        | 80.887  |                        |
|                     | 1298.6045  | 1298.6547   | 0.0502 | 39    | 110        | 120      | TSCEFTGDILR             | 25        | 0       | Carbamidomethyl (C)[3] |
|                     | 1298.6045  | 1298.6547   | 0.0502 | 39    | 110        | 120      | TSCEFTGDILR             |           |         | Carbamidomethyl (C)[3] |
|                     | 1338.6437  | 1338.6945   | 0.0508 | 38    | 461        | 471      | NFITQGGPYENR            | 57        | 99.919  |                        |
|                     | 1338.6437  | 1338.6945   | 0.0508 | 38    | 461        | 471      | NFITQGGPYENR            |           |         |                        |
|                     | 1437.7373  | 1437.7911   | 0.0538 | 37    | 495        | 506      | IPQSTLSEFYPR            |           |         |                        |
|                     | 1437.7373  | 1437.7911   | 0.0538 | 37    | 495        | 506      | IPQSTLSEFYPR            | 29        | 53.938  |                        |
|                     | 1520.7954  | 1520.83     | 0.0346 | 23    | 94         | 108      | AVVQVFEGTSGIDAK         |           |         |                        |
|                     | 1556.8319  | 1556.8645   | 0.0326 | 21    | 68         | 81       | YAEIVHLTLPDGTK          |           |         |                        |
|                     | 1556.8319  | 1556.8645   | 0.0326 | 21    | 68         | 81       | YAEIVHLTLPDGTK          |           |         |                        |
|                     | 1593.8384  | 1593.8885   | 0.0501 | 31    | 494        | 506      | RIPQSTLSEFYPR           |           |         |                        |
|                     | 1593.8384  | 1593.8885   | 0.0501 | 31    | 494        | 506      | RIPQSTLSEFYPR           |           |         |                        |
|                     | 1596.9108  | 1596.96     | 0.0492 | 31    | 387        | 400      | QIYPPINVLPPLSR          |           |         |                        |
|                     | 1596.9108  | 1596.96     | 0.0492 | 31    | 387        | 400      | QIYPPINVLPPLSR          |           |         |                        |
|                     | 1712.933   | 1712.9806   | 0.0476 | 28    | 68         | 82       | YAEIVHLTLPDGTKR         |           |         |                        |
|                     | 2048.0593  | 2048.1025   | 0.0432 | 21    | 8          | 29       | GIVNGAAPPELVPPTGGPMAGAR |           |         | Oxidation (M)[18]      |
|                     | 2052.9849  | 2053.0608   | 0.0759 | 37    | 321        | 337      | RGFFGYMYDTLATIYER       |           |         |                        |

2384.1221 2384.0217 -0.1004 -42 110 130 TSCEFTGDILRTPVSEDMLGR Carbamidomethyl (C)[3]

| Protein Name                              | Accession No. | Peptide Count | Protein Score |            |                | Total Ion Score   | Total Ion C.I. % | Best Ion |                        |      | % Coverage |
|-------------------------------------------|---------------|---------------|---------------|------------|----------------|-------------------|------------------|----------|------------------------|------|------------|
|                                           |               |               | Protein Score | C.I.%      | Best Ion Score |                   |                  | C.I.%    | % Coverage             |      |            |
| ATPase, H transporting, lysosomal V1 subu | gi 16758754   | 13            | 313           | 100        | 198            | 100               | 53               | 99.781   |                        | 31.5 |            |
| Peptide Information                       |               |               |               |            |                |                   |                  |          |                        |      |            |
| Calc. Mass                                | Obsrv. Mass   | ± da          | ± ppm         | Start Seq. | End Seq.       | Sequence          | Ion Score        | C. I. %  | Modification           |      |            |
| 873.4788                                  | 873.5077      | 0.0289        | 33            | 30         | 37             | EQALAVSR          | 4                | 0        |                        |      |            |
| 873.4788                                  | 873.5077      | 0.0289        | 33            | 30         | 37             | EQALAVSR          |                  |          |                        |      |            |
| 877.4526                                  | 877.4839      | 0.0313        | 36            | 38         | 44             | NYLSQPR           |                  |          |                        |      |            |
| 877.4526                                  | 877.4839      | 0.0313        | 36            | 38         | 44             | NYLSQPR           | 38               | 93.081   |                        |      |            |
| 937.4407                                  | 937.4719      | 0.0312        | 33            | 404        | 412            | SAIGEGMTR         |                  |          | Oxidation (M)[7]       |      |            |
| 937.4407                                  | 937.4719      | 0.0312        | 33            | 404        | 412            | SAIGEGMTR         |                  |          | Oxidation (M)[7]       |      |            |
| 1120.5303                                 | 1120.5604     | 0.0301        | 27            | 121        | 130            | TPVSEDMLGR        |                  |          | Oxidation (M)[7]       |      |            |
| 1120.5303                                 | 1120.5604     | 0.0301        | 27            | 121        | 130            | TPVSEDMLGR        | 14               | 0        | Oxidation (M)[7]       |      |            |
| 1189.6323                                 | 1189.6759     | 0.0436        | 37            | 131        | 141            | VFNGSGKPIDR       | 31               | 63.266   |                        |      |            |
| 1189.6323                                 | 1189.6759     | 0.0436        | 37            | 131        | 141            | VFNGSGKPIDR       |                  |          |                        |      |            |
| 1298.6045                                 | 1298.652      | 0.0475        | 37            | 110        | 120            | TSCEFTGDILR       |                  |          | Carbamidomethyl (C)[3] |      |            |
| 1338.6437                                 | 1338.6924     | 0.0487        | 36            | 461        | 471            | NFITQGPYENR       |                  |          |                        |      |            |
| 1338.6437                                 | 1338.6924     | 0.0487        | 36            | 461        | 471            | NFITQGPYENR       | 53               | 99.781   |                        |      |            |
| 1437.7373                                 | 1437.7891     | 0.0518        | 36            | 495        | 506            | IPQSTLSEFYPR      | 31               | 61.446   |                        |      |            |
| 1437.7373                                 | 1437.7891     | 0.0518        | 36            | 495        | 506            | IPQSTLSEFYPR      |                  |          |                        |      |            |
| 1520.7954                                 | 1520.8296     | 0.0342        | 22            | 94         | 108            | AVVQVFEGTSGIDAK   | 30               | 58.878   |                        |      |            |
| 1520.7954                                 | 1520.8296     | 0.0342        | 22            | 94         | 108            | AVVQVFEGTSGIDAK   |                  |          |                        |      |            |
| 1556.8319                                 | 1556.8612     | 0.0293        | 19            | 68         | 81             | YAEIVHLTLPDGTK    |                  |          |                        |      |            |
| 1593.8384                                 | 1593.8843     | 0.0459        | 29            | 494        | 506            | RIPQSTLSEFYPR     |                  |          |                        |      |            |
| 1593.8384                                 | 1593.8843     | 0.0459        | 29            | 494        | 506            | RIPQSTLSEFYPR     |                  |          |                        |      |            |
| 1985.1252                                 | 1985.1008     | -0.0244       | -12           | 387        | 403            | QIYPPINVLPSLSRLMK |                  |          | Oxidation (M)[16]      |      |            |
| 1985.1252                                 | 1985.1008     | -0.0244       | -12           | 387        | 403            | QIYPPINVLPSLSRLMK |                  |          | Oxidation (M)[16]      |      |            |
| 2052.9849                                 | 2053.0547     | 0.0698        | 34            | 321        | 337            | RGFPGYMYDLATIYER  |                  |          |                        |      |            |
| 2052.9849                                 | 2053.0547     | 0.0698        | 34            | 321        | 337            | RGFPGYMYDLATIYER  |                  |          |                        |      |            |

| Protein Name                              | Accession No. | Peptide Count | Protein Score |            |                | Total Ion Score         | Total Ion C.I. % | Best Ion |                        |      | % Coverage |
|-------------------------------------------|---------------|---------------|---------------|------------|----------------|-------------------------|------------------|----------|------------------------|------|------------|
|                                           |               |               | Protein Score | C.I.%      | Best Ion Score |                         |                  | C.I.%    | % Coverage             |      |            |
| ATPase, H transporting, lysosomal V1 subu | gi 16758754   | 16            | 389           | 100        | 234            | 100                     | 75               | 100      |                        | 29.2 |            |
| Peptide Information                       |               |               |               |            |                |                         |                  |          |                        |      |            |
| Calc. Mass                                | Obsrv. Mass   | ± da          | ± ppm         | Start Seq. | End Seq.       | Sequence                | Ion Score        | C. I. %  | Modification           |      |            |
| 873.4788                                  | 873.5006      | 0.0218        | 25            | 30         | 37             | EQALAVSR                | 21               | 0        |                        |      |            |
| 873.4788                                  | 873.5006      | 0.0218        | 25            | 30         | 37             | EQALAVSR                |                  |          |                        |      |            |
| 877.4526                                  | 877.4751      | 0.0225        | 26            | 38         | 44             | NYLSQPR                 | 27               | 61.054   |                        |      |            |
| 877.4526                                  | 877.4751      | 0.0225        | 26            | 38         | 44             | NYLSQPR                 |                  |          |                        |      |            |
| 937.4407                                  | 937.4615      | 0.0208        | 22            | 404        | 412            | SAIGEGMTR               |                  |          | Oxidation (M)[7]       |      |            |
| 1120.5303                                 | 1120.5557     | 0.0254        | 23            | 121        | 130            | TPVSEDMLGR              |                  |          | Oxidation (M)[7]       |      |            |
| 1189.6323                                 | 1189.671      | 0.0387        | 33            | 131        | 141            | VFNGSGKPIDR             |                  |          |                        |      |            |
| 1189.6323                                 | 1189.671      | 0.0387        | 33            | 131        | 141            | VFNGSGKPIDR             | 54               | 99.919   |                        |      |            |
| 1298.6045                                 | 1298.6458     | 0.0413        | 32            | 110        | 120            | TSCEFTGDILR             |                  |          | Carbamidomethyl (C)[3] |      |            |
| 1338.6437                                 | 1338.6915     | 0.0478        | 36            | 461        | 471            | NFITQGPYENR             | 75               | 100      |                        |      |            |
| 1338.6437                                 | 1338.6915     | 0.0478        | 36            | 461        | 471            | NFITQGPYENR             |                  |          |                        |      |            |
| 1437.7373                                 | 1437.7821     | 0.0448        | 31            | 495        | 506            | IPQSTLSEFYPR            | 56               | 99.957   |                        |      |            |
| 1437.7373                                 | 1437.7821     | 0.0448        | 31            | 495        | 506            | IPQSTLSEFYPR            |                  |          |                        |      |            |
| 1520.7954                                 | 1520.8182     | 0.0228        | 15            | 94         | 108            | AVVQVFEGTSGIDAK         |                  |          |                        |      |            |
| 1556.8319                                 | 1556.8588     | 0.0269        | 17            | 68         | 81             | YAEIVHLTLPDGTK          |                  |          |                        |      |            |
| 1593.8384                                 | 1593.8796     | 0.0412        | 26            | 494        | 506            | RIPQSTLSEFYPR           |                  |          |                        |      |            |
| 1596.9108                                 | 1596.9421     | 0.0313        | 20            | 387        | 400            | QIYPPINVLPSLSR          |                  |          |                        |      |            |
| 1712.933                                  | 1712.975      | 0.042         | 25            | 68         | 82             | YAEIVHLTLPDGTKR         |                  |          |                        |      |            |
| 1985.1252                                 | 1985.0955     | -0.0297       | -15           | 387        | 403            | QIYPPINVLPSLSRLMK       |                  |          | Oxidation (M)[16]      |      |            |
| 2048.0593                                 | 2048.0923     | 0.033         | 16            | 8          | 29             | GIVNGAAPPELVPPTGGPMAGAR |                  |          | Oxidation (M)[18]      |      |            |
| 2384.1221                                 | 2383.9868     | -0.1353       | -57           | 110        | 130            | TSCEFTGDILRTPVSEDMLGR   |                  |          | Carbamidomethyl (C)[3] |      |            |

| Protein Name        | Accession No. | Peptide Count | Protein Score |            |                | Total Ion Score     | Total Ion C.I. % | Best Ion |                         |      | % Coverage |
|---------------------|---------------|---------------|---------------|------------|----------------|---------------------|------------------|----------|-------------------------|------|------------|
|                     |               |               | Protein Score | C.I.%      | Best Ion Score |                     |                  | C.I.%    | % Coverage              |      |            |
| Alpha-enolase       | spt P04764    | 14            | 304           | 100        | 173            |                     | 100              | 70       | 100                     | 34.6 |            |
| Peptide Information |               |               |               |            |                |                     |                  |          |                         |      |            |
| Calc. Mass          | Obsrv. Mass   | ± da          | ± ppm         | Start Seq. | End Seq.       | Sequence            | Ion Score        | C. I. %  | Modification            |      |            |
| 800.3824            | 800.4017      | 0.0193        | 24            | 256        | 261            | YDLDFK              |                  |          |                         |      |            |
| 800.3824            | 800.4017      | 0.0193        | 24            | 256        | 261            | YDLDFK              | 11               | 0        |                         |      |            |
| 806.4518            | 806.4669      | 0.0151        | 19            | 406        | 411            | YNQILR              | 47               | 99.133   |                         |      |            |
| 806.4518            | 806.4669      | 0.0151        | 19            | 406        | 411            | YNQILR              |                  |          |                         |      |            |
| 810.4468            | 810.4562      | 0.0094        | 12            | 64         | 70             | AVEHINK             |                  |          |                         |      |            |
| 810.4468            | 810.4562      | 0.0094        | 12            | 64         | 70             | AVEHINK             |                  |          |                         |      |            |
| 815.4872            | 815.4864      | -0.0008       | -1            | 221        | 227            | EAELELLK            |                  |          |                         |      |            |
| 958.5203            | 958.5419      | 0.0216        | 23            | 81         | 88             | LNVVEQEK            |                  |          |                         |      |            |
| 1086.6154           | 1086.6361     | 0.0207        | 19            | 80         | 88             | KLNVVEQEK           | 27               | 20.787   |                         |      |            |
| 1086.6154           | 1086.6361     | 0.0207        | 19            | 80         | 88             | KLNVVEQEK           |                  |          |                         |      |            |
| 1143.6156           | 1143.6345     | 0.0189        | 17            | 183        | 192            | IGAEVYHNLK          | 70               | 99.995   |                         |      |            |
| 1143.6156           | 1143.6345     | 0.0189        | 17            | 183        | 192            | IGAEVYHNLK          |                  |          |                         |      |            |
| 1406.7162           | 1406.7312     | 0.015         | 11            | 15         | 27             | GNPTVEVDLYTAK       |                  |          |                         |      |            |
| 1406.7162           | 1406.7312     | 0.015         | 11            | 15         | 27             | GNPTVEVDLYTAK       |                  |          |                         |      |            |
| 1439.7417           | 1439.7546     | 0.0129        | 9             | 269        | 280            | YITPDQLADLYK        |                  |          |                         |      |            |
| 1557.759            | 1557.7776     | 0.0186        | 12            | 358        | 371            | LAQSNWGWVMVSHR      |                  |          | Oxidation (M)[10]       |      |            |
| 1557.759            | 1557.7776     | 0.0186        | 12            | 358        | 371            | LAQSNWGWVMVSHR      | 3                |          | Oxidation (M)[10]       |      |            |
| 1633.8214           | 1633.8322     | 0.0108        | 7             | 343        | 357            | VNQIGSVTESLQACK     |                  |          | Carbamidomethyl (C)[14] |      |            |
| 1633.8214           | 1633.8322     | 0.0108        | 7             | 343        | 357            | VNQIGSVTESLQACK     |                  |          | Carbamidomethyl (C)[14] |      |            |
| 1668.7455           | 1668.7522     | 0.0067        | 4             | 89         | 102            | IDQLMIEMDGTENK      | 9                | 0        | Oxidation (M)[5,8]      |      |            |
| 1668.7455           | 1668.7522     | 0.0067        | 4             | 89         | 102            | IDQLMIEMDGTENK      |                  |          | Oxidation (M)[5,8]      |      |            |
| 1804.9438           | 1804.9741     | 0.0303        | 17            | 32         | 49             | AAVPSGASTGIYEALELR  |                  |          |                         |      |            |
| 1804.9438           | 1804.9741     | 0.0303        | 17            | 32         | 49             | AAVPSGASTGIYEALELR  | 16               | 0        |                         |      |            |
| 1960.9246           | 1960.9404     | 0.0158        | 8             | 202        | 220            | DATNVGDEGGFAPNILENK |                  |          |                         |      |            |
| 1960.9246           | 1960.9404     | 0.0158        | 8             | 202        | 220            | DATNVGDEGGFAPNILENK |                  |          |                         |      |            |

| Protein Name        | Accession No. | Peptide Count | Protein Score |            |                | Total Ion Score | Total Ion C.I. % | Best Ion |                          |      | % Coverage |
|---------------------|---------------|---------------|---------------|------------|----------------|-----------------|------------------|----------|--------------------------|------|------------|
|                     |               |               | Protein Score | C.I.%      | Best Ion Score |                 |                  | C.I.%    | % Coverage               |      |            |
| Guanine deaminase   | trm Q9JKB7    | 12            | 218           | 100        | 89             |                 | 100              | 59       | 99.97                    | 28.0 |            |
| Peptide Information |               |               |               |            |                |                 |                  |          |                          |      |            |
| Calc. Mass          | Obsrv. Mass   | ± da          | ± ppm         | Start Seq. | End Seq.       | Sequence        | Ion Score        | C. I. %  | Modification             |      |            |
| 885.4352            | 885.4564      | 0.0212        | 24            | 106        | 112            | YTFPTEK         |                  |          |                          |      |            |
| 909.588             | 909.5933      | 0.0053        | 6             | 206        | 213            | VKPIVTPR        |                  |          |                          |      |            |
| 909.588             | 909.5933      | 0.0053        | 6             | 206        | 213            | VKPIVTPR        | 12               | 0        |                          |      |            |
| 997.5023            | 997.5223      | 0.02          | 20            | 194        | 201            | FVSEMLQK        |                  |          | Oxidation (M)[5]         |      |            |
| 998.4941            | 998.5103      | 0.0162        | 16            | 428        | 435            | FLYLGDDR        |                  |          |                          |      |            |
| 998.4941            | 998.5103      | 0.0162        | 16            | 428        | 435            | FLYLGDDR        | 18               | 0        |                          |      |            |
| 1107.568            | 1107.5625     | -0.0055       | -5            | 436        | 445            | NIEEVYVGK       |                  |          |                          |      |            |
| 1107.568            | 1107.5625     | -0.0055       | -5            | 436        | 445            | NIEEVYVGK       |                  |          |                          |      |            |
| 1173.6262           | 1173.6333     | 0.0071        | 6             | 394        | 403            | DFDALLINPR      |                  |          |                          |      |            |
| 1371.759            | 1371.7794     | 0.0204        | 15            | 371        | 384            | LATLGGSQALGLDR  |                  |          |                          |      |            |
| 1371.759            | 1371.7794     | 0.0204        | 15            | 371        | 384            | LATLGGSQALGLDR  |                  |          |                          |      |            |
| 1424.6449           | 1424.7676     | 0.1227        | 86            | 57         | 66             | EWCFKPCEIR      |                  |          | Carbamidomethyl (C)[3,7] |      |            |
| 1424.6449           | 1424.7676     | 0.1227        | 86            | 57         | 66             | EWCFKPCEIR      |                  |          | Carbamidomethyl (C)[3,7] |      |            |
| 1436.7267           | 1436.7267     | 0             | 0             | 42         | 53             | IVFLEESSQEK     |                  |          |                          |      |            |
| 1544.7227           | 1544.7362     | 0.0135        | 9             | 114        | 126            | FQSTDVAEEVYTR   | 59               | 99.97    |                          |      |            |
| 1544.7227           | 1544.7362     | 0.0135        | 9             | 114        | 126            | FQSTDVAEEVYTR   |                  |          |                          |      |            |
| 1598.7189           | 1598.7037     | -0.0152       | -10           | 169        | 181            | VCMDLNNTVPEYK   |                  |          | Carbamidomethyl (C)[2]   |      |            |
| 1712.8351           | 1712.8419     | 0.0068        | 4             | 232        | 245            | THDLYIQSHISENR  |                  |          |                          |      |            |

| Protein Name | Accession No. | Peptide Count | Protein Score | Protein Score | C.I.% | Total Ion Score | Total Ion C.I. % | Best Ion Score | Best Ion C.I.% | % Coverage |
|--------------|---------------|---------------|---------------|---------------|-------|-----------------|------------------|----------------|----------------|------------|
|--------------|---------------|---------------|---------------|---------------|-------|-----------------|------------------|----------------|----------------|------------|

Guanine deaminase trm|Q9JKB7 13 265 100 128 100 53 99.8 29.1

| Peptide Information | Calc. Mass | Obsrv. Mass | ± da    | ± ppm | Start Seq. | End Seq. | Sequence       | Ion Score | C. I. % | Modification     |
|---------------------|------------|-------------|---------|-------|------------|----------|----------------|-----------|---------|------------------|
|                     | 885.4352   | 885.4595    | 0.0243  | 27    | 106        | 112      | YTFPTEK        |           |         |                  |
|                     | 909.588    | 909.5983    | 0.0103  | 11    | 206        | 213      | VKPIVTPR       |           |         |                  |
|                     | 909.588    | 909.5983    | 0.0103  | 11    | 206        | 213      | VKPIVTPR       |           |         |                  |
|                     | 997.5023   | 997.5253    | 0.023   | 23    | 194        | 201      | FVSEMLQK       |           |         | Oxidation (M)[5] |
|                     | 997.5023   | 997.5253    | 0.023   | 23    | 194        | 201      | FVSEMLQK       |           |         | Oxidation (M)[5] |
|                     | 998.4941   | 998.5149    | 0.0208  | 21    | 428        | 435      | FLYLGDDR       | 25        | 0       |                  |
|                     | 998.4941   | 998.5149    | 0.0208  | 21    | 428        | 435      | FLYLGDDR       |           |         |                  |
|                     | 1058.6357  | 1058.6479   | 0.0122  | 12    | 6          | 14       | TPQLALIFR      |           |         |                  |
|                     | 1107.568   | 1107.5677   | -0.0003 | 0     | 436        | 445      | NIEEVYVGK      | 12        | 0       |                  |
|                     | 1107.568   | 1107.5677   | -0.0003 | 0     | 436        | 445      | NIEEVYVGK      |           |         |                  |
|                     | 1173.6262  | 1173.6469   | 0.0207  | 18    | 394        | 403      | DFDALLINPR     | 26        | 0       |                  |
|                     | 1173.6262  | 1173.6469   | 0.0207  | 18    | 394        | 403      | DFDALLINPR     |           |         |                  |
|                     | 1371.759   | 1371.7803   | 0.0213  | 16    | 371        | 384      | LATLGGSQALGLDR | 12        | 0       |                  |
|                     | 1371.759   | 1371.7803   | 0.0213  | 16    | 371        | 384      | LATLGGSQALGLDR |           |         |                  |
|                     | 1436.7267  | 1436.7289   | 0.0022  | 2     | 42         | 53       | IVFLEESSQKEK   |           |         |                  |
|                     | 1436.7267  | 1436.7289   | 0.0022  | 2     | 42         | 53       | IVFLEESSQKEK   | 10        | 0       |                  |
|                     | 1544.7227  | 1544.7402   | 0.0175  | 11    | 114        | 126      | FQSTDVAEEVYTR  | 53        | 99.8    |                  |
|                     | 1544.7227  | 1544.7402   | 0.0175  | 11    | 114        | 126      | FQSTDVAEEVYTR  |           |         |                  |
|                     | 1598.7189  | 1598.7087   | -0.0102 | -6    | 169        | 181      | VCMDLNNTVPEYK  |           |         | Oxidation (M)[3] |
|                     | 1712.8351  | 1712.853    | 0.0179  | 10    | 232        | 245      | THDLYIQSHISENR |           |         |                  |
|                     | 1712.8351  | 1712.853    | 0.0179  | 10    | 232        | 245      | THDLYIQSHISENR |           |         |                  |
|                     | 1814.892   | 1814.8871   | -0.0049 | -3    | 260        | 274      | NYTDVYDKNLLTNK |           |         |                  |
|                     | 1814.892   | 1814.8871   | -0.0049 | -3    | 260        | 274      | NYTDVYDKNLLTNK |           |         |                  |

**Protein Name** Guanosine diphosphate dissociation inhibi  
**Accession No.** cral|CP13240.1  
**Peptide Count** 11  
**Protein Score** 118  
**C.I.%** 100  
**Total Ion Score** 14  
**Total Ion C.I. %**  
**Best Ion Score** 0  
**Best Ion C.I.%** 14  
**% Coverage** 0  
26.3

| Peptide Information | Calc. Mass | Obsrv. Mass | ± da    | ± ppm | Start Seq. | End Seq. | Sequence              | Ion Score | C. I. % | Modification              |
|---------------------|------------|-------------|---------|-------|------------|----------|-----------------------|-----------|---------|---------------------------|
|                     | 938.4941   | 938.516     | 0.0219  | 23    | 211        | 218      | LYSESLAR              |           |         |                           |
|                     | 938.4941   | 938.516     | 0.0219  | 23    | 211        | 218      | LYSESLAR              |           |         |                           |
|                     | 1126.5674  | 1126.5741   | 0.0067  | 6     | 58         | 68       | LPGQPPASMGR           |           |         | Oxidation (M)[9]          |
|                     | 1126.5674  | 1126.5741   | 0.0067  | 6     | 58         | 68       | LPGQPPASMGR           |           |         | Oxidation (M)[9]          |
|                     | 1323.6949  | 1323.6938   | -0.0011 | -1    | 58         | 70       | LPGQPPASMGRGR         |           |         |                           |
|                     | 1351.6852  | 1351.6991   | 0.0139  | 10    | 391        | 402      | DLGTDSQIFISR          |           |         |                           |
|                     | 1351.6852  | 1351.6991   | 0.0139  | 10    | 391        | 402      | DLGTDSQIFISR          |           |         |                           |
|                     | 1401.7307  | 1401.7334   | 0.0027  | 2     | 56         | 68       | FKLPGQPPASMGR         |           |         | Oxidation (M)[11]         |
|                     | 1401.7307  | 1401.7334   | 0.0027  | 2     | 56         | 68       | FKLPGQPPASMGR         | 14        | 0       | Oxidation (M)[11]         |
|                     | 1493.7417  | 1493.7529   | 0.0112  | 7     | 279        | 290      | QLICDPSYVKDR          |           |         | Carbamidomethyl (C)[4]    |
|                     | 1493.7417  | 1493.7529   | 0.0112  | 7     | 279        | 290      | QLICDPSYVKDR          |           |         | Carbamidomethyl (C)[4]    |
|                     | 1638.6774  | 1638.6731   | -0.0043 | -3    | 423        | 435      | RMTGSEDFEEMK          |           |         | Oxidation (M)[2,12]       |
|                     | 1638.6774  | 1638.6731   | -0.0043 | -3    | 424        | 436      | MTGSEDFEEMKR          |           |         | Oxidation (M)[1,11]       |
|                     | 1899.7848  | 1899.7953   | 0.0105  | 6     | 194        | 208      | TDDYLDQPCCETINR       |           |         | Carbamidomethyl (C)[9,10] |
|                     | 2199.0571  | 2199.0649   | 0.0078  | 4     | 310        | 328      | NTNDANSCQIIPQNVNR     |           |         | Carbamidomethyl (C)[8]    |
|                     | 2199.0571  | 2199.0649   | 0.0078  | 4     | 310        | 328      | NTNDANSCQIIPQNVNR     |           |         | Carbamidomethyl (C)[8]    |
|                     | 2384.2417  | 2383.9634   | -0.2783 | -117  | 116        | 137      | IYKVPSTAEALASSLMGLFEK |           |         |                           |
|                     | 2384.2417  | 2383.9634   | -0.2783 | -117  | 116        | 137      | IYKVPSTAEALASSLMGLFEK |           |         |                           |

**Protein Name** Similar to translation initiation factor eIF-4A  
**Accession No.** rf|XP\_221325.2  
**Peptide Count** 8  
**Protein Score** 97  
**C.I.%** 100  
**Total Ion Score** 16  
**Total Ion C.I. %**  
**Best Ion Score** 0  
**Best Ion C.I.%** 16  
**% Coverage** 0  
19.9

| Peptide Information | Calc. Mass | Obsrv. Mass | ± da   | ± ppm | Start Seq. | End Seq. | Sequence | Ion Score | C. I. % | Modification |
|---------------------|------------|-------------|--------|-------|------------|----------|----------|-----------|---------|--------------|
|                     | 831.4107   | 831.4429    | 0.0322 | 39    | 355        | 360      | ENYIHR   |           |         |              |
|                     | 831.4107   | 831.4429    | 0.0322 | 39    | 355        | 360      | ENYIHR   |           |         |              |

|           |           |         |    |     |     |                  |    |  |   |                   |
|-----------|-----------|---------|----|-----|-----|------------------|----|--|---|-------------------|
| 910.4451  | 910.4615  | 0.0164  | 18 | 163 | 169 | VFDMLNR          |    |  |   | Oxidation (M)[4]  |
| 910.4451  | 910.4615  | 0.0164  | 18 | 163 | 169 | VFDMLNR          |    |  |   | Oxidation (M)[4]  |
| 1066.5463 | 1066.5662 | 0.0199  | 19 | 163 | 170 | VFDMLNRR         |    |  |   | Oxidation (M)[4]  |
| 1068.5472 | 1068.5743 | 0.0271  | 25 | 249 | 256 | QFYINVER         |    |  |   |                   |
| 1068.5472 | 1068.5743 | 0.0271  | 25 | 249 | 256 | QFYINVER         |    |  |   |                   |
| 1394.691  | 1394.7031 | 0.0121  | 9  | 70  | 83  | GYDVIAQAQSGTGK   |    |  |   |                   |
| 1394.691  | 1394.7031 | 0.0121  | 9  | 70  | 83  | GYDVIAQAQSGTGK   |    |  |   |                   |
| 1544.8544 | 1544.8807 | 0.0263  | 17 | 148 | 162 | LQAEAPHIVVGTTPGR | 16 |  | 0 |                   |
| 1544.8544 | 1544.8807 | 0.0263  | 17 | 148 | 162 | LQAEAPHIVVGTTPGR |    |  |   |                   |
| 1579.7057 | 1579.701  | -0.0047 | -3 | 297 | 310 | DFTVSALHGDMDQK   |    |  |   | Oxidation (M)[11] |
| 1827.9387 | 1827.9645 | 0.0258  | 14 | 47  | 62  | GIYAYGFEKPSAIQQR |    |  |   |                   |
| 1827.9387 | 1827.9645 | 0.0258  | 14 | 47  | 62  | GIYAYGFEKPSAIQQR |    |  |   |                   |

| Protein Name      | Accession No. | Peptide Count | Protein Score |       |       | Total Ion Score | Total Ion C.I. % | Best Ion Score | Best Ion |      | % Coverage |
|-------------------|---------------|---------------|---------------|-------|-------|-----------------|------------------|----------------|----------|------|------------|
|                   |               |               | Protein Score | C.I.% | C.I.% |                 |                  |                | C.I.%    |      |            |
| Guanine deaminase | trm Q9JKB7    | 6             | 120           | 100   | 51    | 99.727          | 36               | 91.9           |          | 14.8 |            |

| Peptide Information |             |        |       |            |          |                |           |         |                          |  |
|---------------------|-------------|--------|-------|------------|----------|----------------|-----------|---------|--------------------------|--|
| Calc. Mass          | Obsrv. Mass | ± da   | ± ppm | Start Seq. | End Seq. | Sequence       | Ion Score | C. I. % | Modification             |  |
| 998.4941            | 998.5274    | 0.0333 | 33    | 428        | 435      | FLYLGDDR       | 15        | 0       |                          |  |
| 998.4941            | 998.5274    | 0.0333 | 33    | 428        | 435      | FLYLGDDR       |           |         |                          |  |
| 1107.568            | 1107.5858   | 0.0178 | 16    | 436        | 445      | NIEEVYVGK      |           |         |                          |  |
| 1371.759            | 1371.785    | 0.026  | 19    | 371        | 384      | LATLGGSQALGLDR |           |         |                          |  |
| 1371.759            | 1371.785    | 0.026  | 19    | 371        | 384      | LATLGGSQALGLDR |           |         |                          |  |
| 1424.6449           | 1424.7695   | 0.1246 | 87    | 57         | 66       | EWCFKPCEIR     |           |         | Carbamidomethyl (C)[3,7] |  |
| 1436.7267           | 1436.7412   | 0.0145 | 10    | 42         | 53       | IVFLEESSQKEK   |           |         |                          |  |
| 1436.7267           | 1436.7412   | 0.0145 | 10    | 42         | 53       | IVFLEESSQKEK   |           |         |                          |  |
| 1544.7227           | 1544.751    | 0.0283 | 18    | 114        | 126      | FQSTDVAEEVYTR  |           |         |                          |  |
| 1544.7227           | 1544.751    | 0.0283 | 18    | 114        | 126      | FQSTDVAEEVYTR  | 36        | 91.9    |                          |  |

| Protein Name    | Accession No. | Peptide Count | Protein Score |       |       | Total Ion Score | Total Ion C.I. % | Best Ion Score | Best Ion |      | % Coverage |
|-----------------|---------------|---------------|---------------|-------|-------|-----------------|------------------|----------------|----------|------|------------|
|                 |               |               | Protein Score | C.I.% | C.I.% |                 |                  |                | C.I.%    |      |            |
| Creatine kinase | gb AAA40932.1 | 12            | 322           | 100   | 221   | 100             | 66               | 99.992         |          | 38.1 |            |

| Peptide Information |             |        |       |            |          |                         |           |         |                          |  |
|---------------------|-------------|--------|-------|------------|----------|-------------------------|-----------|---------|--------------------------|--|
| Calc. Mass          | Obsrv. Mass | ± da   | ± ppm | Start Seq. | End Seq. | Sequence                | Ion Score | C. I. % | Modification             |  |
| 1031.5554           | 1031.5774   | 0.022  | 21    | 359        | 366      | LLIEMEQR                |           |         |                          |  |
| 1047.5503           | 1047.5715   | 0.0212 | 20    | 359        | 366      | LLIEMEQR                | 24        | 0       | Oxidation (M)[5]         |  |
| 1047.5503           | 1047.5715   | 0.0212 | 20    | 359        | 366      | LLIEMEQR                |           |         | Oxidation (M)[5]         |  |
| 1159.5491           | 1159.5751   | 0.026  | 22    | 2          | 11       | PFSNSHTQK               |           |         |                          |  |
| 1159.5491           | 1159.5751   | 0.026  | 22    | 2          | 11       | PFSNSHTQK               |           |         |                          |  |
| 1230.5507           | 1230.5891   | 0.0384 | 31    | 139        | 148      | GFCLPPHCSR              |           |         | Carbamidomethyl (C)[3,8] |  |
| 1230.5507           | 1230.5891   | 0.0384 | 31    | 139        | 148      | GFCLPPHCSR              | 18        | 0       | Carbamidomethyl (C)[3,8] |  |
| 1232.6157           | 1232.6265   | 0.0108 | 9     | 87         | 96       | DLFDPIEDR               | 14        | 0       |                          |  |
| 1232.6157           | 1232.6265   | 0.0108 | 9     | 87         | 96       | DLFDPIEDR               |           |         |                          |  |
| 1254.5498           | 1254.5713   | 0.0215 | 17    | 97         | 107      | HGGYQPSDEHK             |           |         |                          |  |
| 1254.5498           | 1254.5713   | 0.0215 | 17    | 97         | 107      | HGGYQPSDEHK             | 11        | 0       |                          |  |
| 1303.7256           | 1303.7584   | 0.0328 | 25    | 33         | 43       | VLTPELYAELR             | 29        | 57.511  |                          |  |
| 1303.7256           | 1303.7584   | 0.0328 | 25    | 33         | 43       | VLTPELYAELR             |           |         |                          |  |
| 1602.8334           | 1602.848    | 0.0146 | 9     | 157        | 172      | LAVEALSSLDGDLSSGR       |           |         |                          |  |
| 1698.8367           | 1698.8489   | 0.0122 | 7     | 367        | 381      | LEQQGPIDDLMPAQK         | 58        | 99.95   | Oxidation (M)[11]        |  |
| 1698.8367           | 1698.8489   | 0.0122 | 7     | 367        | 381      | LEQQGPIDDLMPAQK         |           |         | Oxidation (M)[11]        |  |
| 1964.9308           | 1964.9641   | 0.0333 | 17    | 321        | 341      | GTGGVDTAAVGGVFDVSNADR   |           |         |                          |  |
| 1964.9308           | 1964.9641   | 0.0333 | 17    | 321        | 341      | GTGGVDTAAVGGVFDVSNADR   | 66        | 99.992  |                          |  |
| 2121.0317           | 2121.052    | 0.0203 | 10    | 320        | 341      | RGTGGVDTAAVGGVFDVSNADR  | 2         | 0       |                          |  |
| 2121.0317           | 2121.052    | 0.0203 | 10    | 320        | 341      | RGTGGVDTAAVGGVFDVSNADR  |           |         |                          |  |
| 2201.9556           | 2201.9763   | 0.0207 | 9     | 14         | 32       | FPAEDEFDDLSSHNHMAK      |           |         | Oxidation (M)[17]        |  |
| 2518.1692           | 2518.1792   | 0.01   | 4     | 108        | 130      | TDLNPDNLQGGDDLDPNYVLSRR |           |         |                          |  |
| 2518.1692           | 2518.1792   | 0.01   | 4     | 108        | 130      | TDLNPDNLQGGDDLDPNYVLSRR |           |         |                          |  |



| Protein Name                                            | Accession No. | Peptide Count | Protein Score | Protein Score C.I.% | Total Ion Score | Total Ion C.I. % | Best Ion Score | Best Ion C.I.% | % Coverage |      |
|---------------------------------------------------------|---------------|---------------|---------------|---------------------|-----------------|------------------|----------------|----------------|------------|------|
| NAD <sup>+</sup> -specific isocitrate dehydrogenase a-s | trm Q99NA5    | 9             | 155           | 100                 | 68              |                  | 99.997         | 29             | 75.65      | 26.0 |

Peptide Information

| Calc. Mass | Obsrv. Mass | ± da    | ± ppm | Start Seq. | End Seq. | Sequence        | Ion Score | C. I. % | Modification             |
|------------|-------------|---------|-------|------------|----------|-----------------|-----------|---------|--------------------------|
| 1028.516   | 1028.5249   | 0.0089  | 9     | 59         | 66       | APIQWEER        | 29        | 75.65   |                          |
| 1028.516   | 1028.5249   | 0.0089  | 9     | 59         | 66       | APIQWEER        |           |         |                          |
| 1041.5687  | 1041.5568   | -0.0119 | -11   | 67         | 77       | NVTAIQGGPGGK    |           |         |                          |
| 1054.5238  | 1054.5187   | -0.0051 | -5    | 206        | 214      | MSDGLFLQK       |           |         | Oxidation (M)[1]         |
| 1123.5817  | 1123.5795   | -0.0022 | -2    | 327        | 336      | IEAACFATIK      |           |         | Carbamidomethyl (C)[5]   |
| 1126.5463  | 1126.5609   | 0.0146  | 13    | 317        | 326      | HMGLFDHAAK      |           |         |                          |
| 1126.5463  | 1126.5609   | 0.0146  | 13    | 317        | 326      | HMGLFDHAAK      |           |         |                          |
| 1142.5411  | 1142.535    | -0.0061 | -5    | 317        | 326      | HMGLFDHAAK      |           |         | Oxidation (M)[2]         |
| 1216.5996  | 1216.6134   | 0.0138  | 11    | 179        | 188      | IAEFAFEYAR      |           |         |                          |
| 1216.5996  | 1216.6134   | 0.0138  | 11    | 179        | 188      | IAEFAFEYAR      | 29        | 72.742  |                          |
| 1316.5245  | 1316.5311   | 0.0066  | 5     | 351        | 360      | CSDFTEEICR      |           |         | Carbamidomethyl (C)[1,9] |
| 1391.7529  | 1391.7576   | 0.0047  | 3     | 135        | 146      | TPYTDVNVITIR    |           |         |                          |
| 1391.7529  | 1391.7576   | 0.0047  | 3     | 135        | 146      | TPYTDVNVITIR    | 10        | 0       |                          |
| 1606.8734  | 1606.8694   | -0.004  | -2    | 101        | 115      | TPIAAGHPSMNLRLR |           |         | Oxidation (M)[10]        |
| 1606.8734  | 1606.8694   | -0.004  | -2    | 101        | 115      | TPIAAGHPSMNLRLR |           |         | Oxidation (M)[10]        |

| Protein Name                                | Accession No. | Peptide Count | Protein Score | Protein Score C.I.% | Total Ion Score | Total Ion C.I. % | Best Ion Score | Best Ion C.I.% | % Coverage |      |
|---------------------------------------------|---------------|---------------|---------------|---------------------|-----------------|------------------|----------------|----------------|------------|------|
| Guanine nucleotide binding protein, alpha o | cra CP51914   | 6             | 177           | 100                 | 118             |                  | 100            | 70             | 99.997     | 13.6 |

Peptide Information

| Calc. Mass | Obsrv. Mass | ± da    | ± ppm | Start Seq. | End Seq. | Sequence        | Ion Score | C. I. % | Modification     |
|------------|-------------|---------|-------|------------|----------|-----------------|-----------|---------|------------------|
| 891.4682   | 891.4983    | 0.0301  | 34    | 198        | 205      | LFDVGGQR        |           |         |                  |
| 891.4682   | 891.4983    | 0.0301  | 34    | 198        | 205      | LFDVGGQR        | 27        | 24.242  |                  |
| 1380.7158  | 1380.744    | 0.0282  | 20    | 181        | 192      | TTGIVETHFTFK    |           |         |                  |
| 1380.7158  | 1380.744    | 0.0282  | 20    | 181        | 192      | TTGIVETHFTFK    |           |         |                  |
| 1445.6907  | 1445.7213   | 0.0306  | 21    | 54         | 66       | IHEDGFSGEDVK    |           |         |                  |
| 1445.6907  | 1445.7213   | 0.0306  | 21    | 54         | 66       | IHEDGFSGEDVK    | 11        | 0       |                  |
| 1597.8624  | 1597.7501   | -0.1123 | -70   | 258        | 270      | WFTDTSIILFLNK   |           |         |                  |
| 1597.8624  | 1597.7501   | -0.1123 | -70   | 258        | 270      | WFTDTSIILFLNK   |           |         |                  |
| 1599.7319  | 1599.7551   | 0.0232  | 15    | 86         | 99       | AMDTLGVVEYGDKER |           |         | Oxidation (M)[2] |
| 1599.7319  | 1599.7551   | 0.0232  | 15    | 86         | 99       | AMDTLGVVEYGDKER | 9         | 0       | Oxidation (M)[2] |
| 1689.8442  | 1689.8916   | 0.0474  | 28    | 162        | 176      | IGAADYQPTEQDILR | 70        | 99.997  |                  |
| 1689.8442  | 1689.8916   | 0.0474  | 28    | 162        | 176      | IGAADYQPTEQDILR |           |         |                  |

| Protein Name                                | Accession No. | Peptide Count | Protein Score | Protein Score C.I.% | Total Ion Score | Total Ion C.I. % | Best Ion Score | Best Ion C.I.% | % Coverage |      |
|---------------------------------------------|---------------|---------------|---------------|---------------------|-----------------|------------------|----------------|----------------|------------|------|
| Guanine nucleotide binding protein, alpha o | cra CP51914   | 8             | 253           | 100                 | 173             |                  | 100            | 60             | 99.967     | 22.3 |

Peptide Information

| Calc. Mass | Obsrv. Mass | ± da   | ± ppm | Start Seq. | End Seq. | Sequence        | Ion Score | C. I. % | Modification     |
|------------|-------------|--------|-------|------------|----------|-----------------|-----------|---------|------------------|
| 891.4682   | 891.5044    | 0.0362 | 41    | 198        | 205      | LFDVGGQR        | 47        | 99.307  |                  |
| 891.4682   | 891.5044    | 0.0362 | 41    | 198        | 205      | LFDVGGQR        |           |         |                  |
| 1314.5883  | 1314.6199   | 0.0316 | 24    | 86         | 97       | AMDTLGVVEYGDK   |           |         | Oxidation (M)[2] |
| 1314.5883  | 1314.6199   | 0.0316 | 24    | 86         | 97       | AMDTLGVVEYGDK   |           |         | Oxidation (M)[2] |
| 1380.7158  | 1380.7542   | 0.0384 | 28    | 181        | 192      | TTGIVETHFTFK    |           |         |                  |
| 1380.7158  | 1380.7542   | 0.0384 | 28    | 181        | 192      | TTGIVETHFTFK    |           |         |                  |
| 1445.6907  | 1445.731    | 0.0403 | 28    | 54         | 66       | IHEDGFSGEDVK    |           |         |                  |
| 1445.6907  | 1445.731    | 0.0403 | 28    | 54         | 66       | IHEDGFSGEDVK    | 53        | 99.843  |                  |
| 1597.8624  | 1597.7494   | -0.113 | -71   | 258        | 270      | WFTDTSIILFLNK   |           |         |                  |
| 1597.8624  | 1597.7494   | -0.113 | -71   | 258        | 270      | WFTDTSIILFLNK   |           |         |                  |
| 1599.7319  | 1599.7639   | 0.032  | 20    | 86         | 99       | AMDTLGVVEYGDKER |           |         | Oxidation (M)[2] |
| 1599.7319  | 1599.7639   | 0.032  | 20    | 86         | 99       | AMDTLGVVEYGDKER | 14        | 0       | Oxidation (M)[2] |
| 1689.8442  | 1689.8964   | 0.0522 | 31    | 162        | 176      | IGAADYQPTEQDILR |           |         |                  |
| 1689.8442  | 1689.8964   | 0.0522 | 31    | 162        | 176      | IGAADYQPTEQDILR | 60        | 99.967  |                  |

|           |           |        |    |     |     |                   |                        |
|-----------|-----------|--------|----|-----|-----|-------------------|------------------------|
| 2005.8551 | 2005.8855 | 0.0304 | 15 | 113 | 129 | MEDTEPFSAELLSAMMR | Oxidation (M)[1,15,16] |
| 2005.8551 | 2005.8855 | 0.0304 | 15 | 113 | 129 | MEDTEPFSAELLSAMMR | Oxidation (M)[1,15,16] |

| Protein Name                               | Accession No. | Peptide Count | Protein Score | Protein Score |    | Total Ion Score | Total Ion C.I. % | Best Ion Score | Best Ion C.I. % | % Coverage |
|--------------------------------------------|---------------|---------------|---------------|---------------|----|-----------------|------------------|----------------|-----------------|------------|
| NAD+-specific isocitrate dehydrogenase a-s | trm Q99NA5    | 6             | 124           | 100           | 72 | 99.999          | 33               | 86.781         | 17.8            |            |

| Peptide Information | Calc. Mass | Obsrv. Mass | ± da   | ± ppm | Start Seq. | End Seq. | Sequence        | Ion Score | C. I. % | Modification             |
|---------------------|------------|-------------|--------|-------|------------|----------|-----------------|-----------|---------|--------------------------|
|                     | 1028.516   | 1028.5465   | 0.0305 | 30    | 59         | 66       | APIQWEER        |           |         |                          |
|                     | 1028.516   | 1028.5465   | 0.0305 | 30    | 59         | 66       | APIQWEER        | 21        | 0       |                          |
|                     | 1142.5411  | 1142.5609   | 0.0198 | 17    | 317        | 326      | HMGLFDHAAK      |           |         | Oxidation (M)[2]         |
|                     | 1216.5996  | 1216.6373   | 0.0377 | 31    | 179        | 188      | IAEFAFEYAR      | 33        | 86.781  |                          |
|                     | 1216.5996  | 1216.6373   | 0.0377 | 31    | 179        | 188      | IAEFAFEYAR      |           |         |                          |
|                     | 1316.5245  | 1316.5613   | 0.0368 | 28    | 351        | 360      | CSDFTEEICR      |           |         | Carbamidomethyl (C)[1,9] |
|                     | 1316.5245  | 1316.5613   | 0.0368 | 28    | 351        | 360      | CSDFTEEICR      |           |         | Carbamidomethyl (C)[1,9] |
|                     | 1391.7529  | 1391.7827   | 0.0298 | 21    | 135        | 146      | TPYTDVNIIVTIR   |           |         |                          |
|                     | 1391.7529  | 1391.7827   | 0.0298 | 21    | 135        | 146      | TPYTDVNIIVTIR   | 19        | 0       |                          |
|                     | 1606.8734  | 1606.896    | 0.0226 | 14    | 101        | 115      | TPIAAGHPSMNLRLR |           |         | Oxidation (M)[10]        |
|                     | 1606.8734  | 1606.896    | 0.0226 | 14    | 101        | 115      | TPIAAGHPSMNLRLR |           |         | Oxidation (M)[10]        |

| Protein Name                             | Accession No. | Peptide Count | Protein Score | Protein Score |    | Total Ion Score | Total Ion C.I. % | Best Ion Score | Best Ion C.I. % | % Coverage |
|------------------------------------------|---------------|---------------|---------------|---------------|----|-----------------|------------------|----------------|-----------------|------------|
| NG,NG-dimethylarginine dimethylaminohydr | spt O08557    | 8             | 174           | 100           | 75 | 100             | 34               | 87.688         | 32.3            |            |

| Peptide Information | Calc. Mass | Obsrv. Mass | ± da    | ± ppm | Start Seq. | End Seq. | Sequence         | Ion Score | C. I. % | Modification           |
|---------------------|------------|-------------|---------|-------|------------|----------|------------------|-----------|---------|------------------------|
|                     | 831.4947   | 831.4919    | -0.0028 | -3    | 230        | 236      | GHVLLHR          |           |         |                        |
|                     | 929.4509   | 929.4608    | 0.0099  | 11    | 19         | 26       | APPESLCR         |           |         | Carbamidomethyl (C)[7] |
|                     | 929.4509   | 929.4608    | 0.0099  | 11    | 19         | 26       | APPESLCR         | 10        | 0       | Carbamidomethyl (C)[7] |
|                     | 1137.5171  | 1137.5289   | 0.0118  | 10    | 32         | 41       | SQGEEVDFAR       | 34        | 87.688  |                        |
|                     | 1137.5171  | 1137.5289   | 0.0118  | 10    | 32         | 41       | SQGEEVDFAR       |           |         |                        |
|                     | 1150.5262  | 1150.5298   | 0.0036  | 3     | 237        | 246      | TPEEYPESAK       |           |         |                        |
|                     | 1177.5089  | 1177.5065   | -0.0024 | -2    | 199        | 207      | IMQQMSDHR        |           |         | Oxidation (M)[2,5]     |
|                     | 1177.5089  | 1177.5065   | -0.0024 | -2    | 199        | 207      | IMQQMSDHR        | 0         | 0       | Oxidation (M)[2,5]     |
|                     | 1679.7871  | 1679.7964   | 0.0093  | 6     | 120        | 135      | DENATLDGGDVLFTGR |           |         |                        |
|                     | 1679.7871  | 1679.7964   | 0.0093  | 6     | 120        | 135      | DENATLDGGDVLFTGR | 31        | 75.434  |                        |
|                     | 1714.901   | 1714.8903   | -0.0107 | -6    | 159        | 174      | DYAVSTVPVADSLHLK |           |         |                        |
|                     | 1714.901   | 1714.8903   | -0.0107 | -6    | 159        | 174      | DYAVSTVPVADSLHLK |           |         |                        |
|                     | 1868.9786  | 1868.9707   | -0.0079 | -4    | 251        | 266      | LKDHLIPVSNSEMEK  |           |         | Oxidation (M)[14]      |
|                     | 1868.9786  | 1868.9707   | -0.0079 | -4    | 251        | 266      | LKDHLIPVSNSEMEK  |           |         | Oxidation (M)[14]      |

| Protein Name            | Accession No.  | Peptide Count | Protein Score | Protein Score |    | Total Ion Score | Total Ion C.I. % | Best Ion Score | Best Ion C.I. % | % Coverage |
|-------------------------|----------------|---------------|---------------|---------------|----|-----------------|------------------|----------------|-----------------|------------|
| Unnamed protein product | emb CAA37654.1 | 5             | 80            | 99.967        | 27 | 31.05           | 27               | 31.05          | 19.5            |            |

| Peptide Information | Calc. Mass | Obsrv. Mass | ± da    | ± ppm | Start Seq. | End Seq. | Sequence        | Ion Score | C. I. % | Modification            |
|---------------------|------------|-------------|---------|-------|------------|----------|-----------------|-----------|---------|-------------------------|
|                     | 829.4315   | 829.4695    | 0.038   | 46    | 207        | 214      | GGWGISPR        |           |         |                         |
|                     | 951.5118   | 951.5261    | 0.0143  | 15    | 296        | 303      | GEPHVTRR        |           |         |                         |
|                     | 1340.6633  | 1340.6902   | 0.0269  | 20    | 284        | 294      | YSFLQFDPAPR     | 27        | 31.05   |                         |
|                     | 1340.6633  | 1340.6902   | 0.0269  | 20    | 284        | 294      | YSFLQFDPAPR     |           |         |                         |
|                     | 1791.837   | 1791.8184   | -0.0186 | -10   | 122        | 135      | QITQVYGFYDECLR  |           |         | Carbamidomethyl (C)[12] |
|                     | 1808.7795  | 1808.7812   | 0.0017  | 1     | 75         | 89       | SPDTNYLFMGDYVDR |           |         | Oxidation (M)[9]        |
|                     | 1808.7795  | 1808.7812   | 0.0017  | 1     | 75         | 89       | SPDTNYLFMGDYVDR |           |         | Oxidation (M)[9]        |

| Protein Name                          | Accession No. | Peptide Count | Protein Score | Protein Score |    | Total Ion Score | Total Ion C.I. % | Best Ion Score | Best Ion C.I. % | % Coverage |
|---------------------------------------|---------------|---------------|---------------|---------------|----|-----------------|------------------|----------------|-----------------|------------|
| Malate dehydrogenase 1, NAD (Soluble) | trm Q6PCV2    | 9             | 194           | 100           | 91 | 100             | 55               | 99.858         | 27.5            |            |

| Peptide Information | Calc. Mass | Obsrv. Mass | ± da | ± ppm | Start Seq. | End Seq. | Sequence | Ion Score | C. I. % | Modification |
|---------------------|------------|-------------|------|-------|------------|----------|----------|-----------|---------|--------------|
|---------------------|------------|-------------|------|-------|------------|----------|----------|-----------|---------|--------------|

|           |           |         |     |     |     |                   |  |  |    |        |                         |
|-----------|-----------|---------|-----|-----|-----|-------------------|--|--|----|--------|-------------------------|
| 803.4257  | 803.4472  | 0.0215  | 27  | 111 | 118 | SQGAALEK          |  |  |    |        |                         |
| 803.4257  | 803.4472  | 0.0215  | 27  | 111 | 118 | SQGAALEK          |  |  |    |        |                         |
| 811.442   | 811.4474  | 0.0054  | 7   | 249 | 255 | AISDHIR           |  |  |    |        |                         |
| 811.442   | 811.4474  | 0.0054  | 7   | 249 | 255 | AISDHIR           |  |  | 17 | 0      |                         |
| 917.4938  | 917.4971  | 0.0033  | 4   | 171 | 179 | LGVTADDVK         |  |  |    |        |                         |
| 935.4866  | 935.4933  | 0.0067  | 7   | 311 | 318 | EKMDLTAK          |  |  |    |        |                         |
| 1026.4673 | 1026.4871 | 0.0198  | 19  | 150 | 157 | ENFSCLTR          |  |  |    |        | Carbamidomethyl (C)[5]  |
| 1026.4673 | 1026.4871 | 0.0198  | 19  | 150 | 157 | ENFSCLTR          |  |  |    |        | Carbamidomethyl (C)[5]  |
| 1178.6165 | 1178.6331 | 0.0166  | 14  | 221 | 230 | GEFITTVQQR        |  |  |    |        |                         |
| 1178.6165 | 1178.6331 | 0.0166  | 14  | 221 | 230 | GEFITTVQQR        |  |  | 55 | 99.858 |                         |
| 1387.725  | 1387.7142 | -0.0108 | -8  | 80  | 92  | DLDAVLVGSMPR      |  |  |    |        | Oxidation (M)[11]       |
| 1393.7111 | 1393.7209 | 0.0098  | 7   | 299 | 310 | FVEGLPINDFSR      |  |  |    |        |                         |
| 1393.7111 | 1393.7209 | 0.0098  | 7   | 299 | 310 | FVEGLPINDFSR      |  |  | 20 | 0      |                         |
| 1757.9214 | 1757.9026 | -0.0188 | -11 | 126 | 142 | VIVVGNPANTNCLTASK |  |  |    |        | Carbamidomethyl (C)[12] |
| 1757.9214 | 1757.9026 | -0.0188 | -11 | 126 | 142 | VIVVGNPANTNCLTASK |  |  |    |        | Carbamidomethyl (C)[12] |

| Protein Name                            | Accession No. | Peptide Count | Protein Score | Protein Score C.I.% | Total Ion Score | Total Ion C.I. % | Best Ion Score | Best Ion C.I.% | % Coverage |      |
|-----------------------------------------|---------------|---------------|---------------|---------------------|-----------------|------------------|----------------|----------------|------------|------|
| Pyruvate dehydrogenase (Lipoamide) beta | trm Q6AY95    | 9             | 116           | 100                 | 38              |                  | 94.48          | 22             | 0          | 27.6 |

| Peptide Information | Calc. Mass | Obsrv. Mass | ± da    | ± ppm | Start Seq. | End Seq. | Sequence         | Ion Score | C. I. % | Modification            |
|---------------------|------------|-------------|---------|-------|------------|----------|------------------|-----------|---------|-------------------------|
|                     | 902.5345   | 902.4565    | -0.078  | -86   | 220        | 227      | DFLIPIGK         |           |         |                         |
|                     | 902.5345   | 902.4565    | -0.078  | -86   | 220        | 227      | DFLIPIGK         |           |         |                         |
|                     | 1255.6892  | 1255.6935   | 0.0043  | 3     | 337        | 347      | ILEDNSIPQVK      |           |         |                         |
|                     | 1255.6892  | 1255.6935   | 0.0043  | 3     | 337        | 347      | ILEDNSIPQVK      |           |         |                         |
|                     | 1432.7511  | 1432.7002   | -0.0509 | -36   | 1          | 14       | MAGVAGLVRGLCGR   |           |         | Carbamidomethyl (C)[12] |
|                     | 1533.6849  | 1533.713    | 0.0281  | 18    | 37         | 49       | EAINQGMDEELER    | 8         | 0       |                         |
|                     | 1533.6849  | 1533.713    | 0.0281  | 18    | 37         | 49       | EAINQGMDEELER    |           |         |                         |
|                     | 1549.6798  | 1549.7004   | 0.0206  | 13    | 37         | 49       | EAINQGMDEELER    |           |         | Oxidation (M)[7]        |
|                     | 1549.6798  | 1549.7004   | 0.0206  | 13    | 37         | 49       | EAINQGMDEELER    | 22        | 0       | Oxidation (M)[7]        |
|                     | 1763.8785  | 1763.8956   | 0.0171  | 10    | 309        | 324      | IMEGPAFNFLDAPAVR | 16        | 0       | Oxidation (M)[2]        |
|                     | 1763.8785  | 1763.8956   | 0.0171  | 10    | 309        | 324      | IMEGPAFNFLDAPAVR |           |         | Oxidation (M)[2]        |
|                     | 1801.9006  | 1801.9089   | 0.0083  | 5     | 53         | 68       | VLLGEEVAQYDGAYK  |           |         |                         |
|                     | 1835.9241  | 1835.9368   | 0.0127  | 7     | 270        | 285      | TIRPMDIEAIEASVMK |           |         | Oxidation (M)[5,15]     |
|                     | 1835.9241  | 1835.9368   | 0.0127  | 7     | 270        | 285      | TIRPMDIEAIEASVMK |           |         | Oxidation (M)[5,15]     |
|                     | 1857.9568  | 1857.9602   | 0.0034  | 2     | 130        | 145      | TYYMSAGLQPVIVFR  |           |         | Oxidation (M)[4]        |
|                     | 1857.9568  | 1857.9602   | 0.0034  | 2     | 130        | 145      | TYYMSAGLQPVIVFR  |           |         | Oxidation (M)[4]        |
|                     | 1921.8444  | 1921.8593   | 0.0149  | 8     | 37         | 52       | EAINQGMDEELERDEK |           |         | Oxidation (M)[7]        |

| Protein Name       | Accession No.  | Peptide Count | Protein Score | Protein Score C.I.% | Total Ion Score | Total Ion C.I. % | Best Ion Score | Best Ion C.I.% | % Coverage |      |
|--------------------|----------------|---------------|---------------|---------------------|-----------------|------------------|----------------|----------------|------------|------|
| Similar to HSPC263 | rf XP_215178.2 | 8             | 120           | 100                 | 25              |                  | 0              | 25             | 0          | 29.9 |

| Peptide Information | Calc. Mass | Obsrv. Mass | ± da   | ± ppm | Start Seq. | End Seq. | Sequence            | Ion Score | C. I. % | Modification           |
|---------------------|------------|-------------|--------|-------|------------|----------|---------------------|-----------|---------|------------------------|
|                     | 829.4566   | 829.4819    | 0.0253 | 31    | 103        | 108      | KYSYIR              |           |         |                        |
|                     | 829.4566   | 829.4819    | 0.0253 | 31    | 104        | 109      | YSYIRK              |           |         |                        |
|                     | 1050.5942  | 1050.6223   | 0.0281 | 27    | 202        | 210      | LLTSGYLQR           |           |         |                        |
|                     | 1050.5942  | 1050.6223   | 0.0281 | 27    | 202        | 210      | LLTSGYLQR           |           |         |                        |
|                     | 1238.5952  | 1238.6281   | 0.0329 | 27    | 214        | 223      | FFEHFIEGGR          |           |         |                        |
|                     | 1238.5952  | 1238.6281   | 0.0329 | 27    | 214        | 223      | FFEHFIEGGR          | 7         | 0       |                        |
|                     | 1285.5742  | 1285.6001   | 0.0259 | 20    | 110        | 119      | TRPDGNCFYR          | 4         | 0       | Carbamidomethyl (C)[7] |
|                     | 1285.5742  | 1285.6001   | 0.0259 | 20    | 110        | 119      | TRPDGNCFYR          |           |         | Carbamidomethyl (C)[7] |
|                     | 1515.6598  | 1515.6704   | 0.0106 | 7     | 85         | 96       | EYAEDDNIYQQK        |           |         |                        |
|                     | 1515.6598  | 1515.6704   | 0.0106 | 7     | 85         | 96       | EYAEDDNIYQQK        |           |         |                        |
|                     | 1723.9337  | 1723.969    | 0.0353 | 20    | 62         | 76       | IQQEIAVQNPLVSR      |           |         |                        |
|                     | 1723.9337  | 1723.969    | 0.0353 | 20    | 62         | 76       | IQQEIAVQNPLVSR      | 25        | 0       |                        |
|                     | 1839.8507  | 1839.8657   | 0.015  | 8     | 264        | 281      | GEGGTTNPHVFPPEGSEPK |           |         |                        |
|                     | 1839.8507  | 1839.8657   | 0.015  | 8     | 264        | 281      | GEGGTTNPHVFPPEGSEPK |           |         |                        |

| Protein Name                                | Accession No. | Peptide Count | Protein Score | Protein Score |  | Total Ion Score | Total Ion C.I. % | Best Ion Score | Best Ion C.I. % | % Coverage |      |
|---------------------------------------------|---------------|---------------|---------------|---------------|--|-----------------|------------------|----------------|-----------------|------------|------|
|                                             |               |               |               | C.I. %        |  |                 |                  |                |                 |            |      |
| Guanine nucleotide binding protein, beta po | cra rCP49190  | 7             | 120           | 100           |  | 34              |                  | 78.756         | 34              | 78.756     | 17.4 |

Peptide Information

| Calc. Mass | Obsrv. Mass | ± da    | ± ppm | Start Seq. | End Seq. | Sequence      | Ion Score | C. I. % | Modification               |
|------------|-------------|---------|-------|------------|----------|---------------|-----------|---------|----------------------------|
| 804.4509   | 804.4882    | 0.0373  | 46    | 43         | 48       | IQMRTR        |           |         |                            |
| 804.4509   | 804.4882    | 0.0373  | 46    | 43         | 48       | IQMRTR        |           |         |                            |
| 873.4424   | 873.4664    | 0.024   | 27    | 9          | 15       | QEAEQLR       |           |         |                            |
| 873.4424   | 873.4664    | 0.024   | 27    | 9          | 15       | QEAEQLR       |           |         |                            |
| 916.4958   | 916.5021    | 0.0063  | 7     | 130        | 137      | EGNVRVSR      |           |         |                            |
| 916.4958   | 916.5021    | 0.0063  | 7     | 130        | 137      | EGNVRVSR      |           |         |                            |
| 1009.5173  | 1009.5446   | 0.0273  | 27    | 305        | 314      | AGVLAGHDNR    |           |         |                            |
| 1009.5173  | 1009.5446   | 0.0273  | 27    | 305        | 314      | AGVLAGHDNR    | 34        | 78.756  |                            |
| 1352.6052  | 1352.632    | 0.0268  | 20    | 58         | 68       | IYAMHWGTDNR   | 12        | 0       | Oxidation (M)[4]           |
| 1352.6052  | 1352.632    | 0.0268  | 20    | 58         | 68       | IYAMHWGTDNR   |           |         | Oxidation (M)[4]           |
| 1384.7291  | 1384.6259   | -0.1032 | -75   | 9          | 19       | QEAEQLRNQIR   |           |         |                            |
| 1384.7291  | 1384.6259   | -0.1032 | -75   | 9          | 19       | QEAEQLRNQIR   |           |         |                            |
| 1549.6886  | 1549.7227   | 0.0341  | 22    | 138        | 150      | ELPGHTGYLSCCR |           |         | Carbamidomethyl (C)[11,12] |
| 1549.6886  | 1549.7227   | 0.0341  | 22    | 138        | 150      | ELPGHTGYLSCCR |           |         | Carbamidomethyl (C)[11,12] |

| Protein Name           | Accession No.  | Peptide Count | Protein Score | Protein Score |  | Total Ion Score | Total Ion C.I. % | Best Ion Score | Best Ion C.I. % | % Coverage |      |
|------------------------|----------------|---------------|---------------|---------------|--|-----------------|------------------|----------------|-----------------|------------|------|
|                        |                |               |               | C.I. %        |  |                 |                  |                |                 |            |      |
| Similar to Swiprosin 1 | rf XP_216579.2 | 7             | 173           | 100           |  | 81              |                  | 100            | 42              | 98.339     | 29.3 |

Peptide Information

| Calc. Mass | Obsrv. Mass | ± da    | ± ppm | Start Seq. | End Seq. | Sequence          | Ion Score | C. I. % | Modification     |
|------------|-------------|---------|-------|------------|----------|-------------------|-----------|---------|------------------|
| 1134.663   | 1134.6572   | -0.0058 | -5    | 123        | 133      | LGAPQTHLGLK       |           |         |                  |
| 1536.7177  | 1536.7415   | 0.0238  | 15    | 206        | 217      | FEIEIKAEQEER      |           |         |                  |
| 1536.7177  | 1536.7415   | 0.0238  | 15    | 206        | 217      | FEIEIKAEQEER      | 13        | 0       |                  |
| 1558.6577  | 1558.6595   | 0.0018  | 1     | 134        | 146      | SMIQEVDEDFDSK     |           |         | Oxidation (M)[2] |
| 1568.7664  | 1568.7914   | 0.025   | 16    | 62         | 76       | ADLNQGIGEPQSPSR   |           |         |                  |
| 1568.7664  | 1568.7914   | 0.025   | 16    | 62         | 76       | ADLNQGIGEPQSPSR   | 35        | 92.215  |                  |
| 1724.8674  | 1724.8868   | 0.0194  | 11    | 61         | 76       | RADLNQGIGEPQSPSR  | 42        | 98.339  |                  |
| 1724.8674  | 1724.8868   | 0.0194  | 11    | 62         | 77       | ADLNQGIGEPQSPSR   |           |         |                  |
| 1736.8926  | 1736.9141   | 0.0215  | 12    | 159        | 175      | AAAGELQEDSGLHVLAR |           |         |                  |
| 1736.8926  | 1736.9141   | 0.0215  | 12    | 159        | 175      | AAAGELQEDSGLHVLAR | 4         | 0       |                  |

| Protein Name           | Accession No. | Peptide Count | Protein Score | Protein Score |  | Total Ion Score | Total Ion C.I. % | Best Ion Score | Best Ion C.I. % | % Coverage |      |
|------------------------|---------------|---------------|---------------|---------------|--|-----------------|------------------|----------------|-----------------|------------|------|
|                        |               |               |               | C.I. %        |  |                 |                  |                |                 |            |      |
| Annexin A5 (Annexin V) | spt P14668    | 12            | 233           | 100           |  | 76              |                  | 100            | 26              | 15.009     | 43.9 |

Peptide Information

| Calc. Mass | Obsrv. Mass | ± da   | ± ppm | Start Seq. | End Seq. | Sequence     | Ion Score | C. I. % | Modification     |
|------------|-------------|--------|-------|------------|----------|--------------|-----------|---------|------------------|
| 920.5563   | 920.5837    | 0.0274 | 30    | 191        | 198      | FITILGTR     | 18        | 0       |                  |
| 920.5563   | 920.5837    | 0.0274 | 30    | 191        | 198      | FITILGTR     |           |         |                  |
| 992.5046   | 992.5358    | 0.0312 | 31    | 48         | 55       | QQIAEEFK     |           |         |                  |
| 992.5046   | 992.5358    | 0.0312 | 31    | 48         | 55       | QQIAEEFK     | 5         | 0       |                  |
| 1001.5989  | 1001.6309   | 0.032  | 32    | 106        | 114      | VLTEIIASR    |           |         |                  |
| 1001.5989  | 1001.6309   | 0.032  | 32    | 106        | 114      | VLTEIIASR    | 12        | 0       |                  |
| 1106.584   | 1106.6169   | 0.0329 | 30    | 274        | 282      | SEIDLFNIR    |           |         |                  |
| 1126.5851  | 1126.5922   | 0.0071 | 6     | 95         | 105      | HALKGAGTDEK  |           |         |                  |
| 1126.5851  | 1126.5922   | 0.0071 | 6     | 95         | 105      | HALKGAGTDEK  |           |         |                  |
| 1143.6918  | 1143.7184   | 0.0266 | 23    | 77         | 86       | LIVALMKPSR   |           |         | Oxidation (M)[6] |
| 1143.6918  | 1143.7184   | 0.0266 | 23    | 77         | 86       | LIVALMKPSR   |           |         | Oxidation (M)[6] |
| 1155.5753  | 1155.6108   | 0.0355 | 31    | 258        | 268      | GAGTDDHTLIR  |           |         |                  |
| 1155.5753  | 1155.6108   | 0.0355 | 31    | 258        | 268      | GAGTDDHTLIR  | 20        | 0       |                  |
| 1172.682   | 1172.7036   | 0.0216 | 18    | 149        | 158      | MLVVLLQANR   |           |         | Oxidation (M)[1] |
| 1172.682   | 1172.7036   | 0.0216 | 18    | 149        | 158      | MLVVLLQANR   |           |         | Oxidation (M)[1] |
| 1258.5698  | 1258.6099   | 0.0401 | 32    | 4          | 15       | GTVTDFSGFDGR | 26        | 15.009  |                  |

|           |           |        |    |     |     |                          |                  |
|-----------|-----------|--------|----|-----|-----|--------------------------|------------------|
| 1258.5698 | 1258.6099 | 0.0401 | 32 | 4   | 15  | GTVTDFSGFDGR             |                  |
| 1424.7202 | 1424.7902 | 0.07   | 49 | 56  | 67  | TLFGRDLVNDMK             | Oxidation (M)[1] |
| 1818.8578 | 1818.892  | 0.0342 | 19 | 210 | 224 | YMTISGFQIEETIDR          | Oxidation (M)[2] |
| 2887.2175 | 2887.2476 | 0.0301 | 10 | 124 | 148 | QAYEEYGSNLEDDVVGDTSGYYQR |                  |

| Protein Name                                         | Accession No. | Peptide Count | Protein Score | Protein Score C.I.% | Total Ion Score | Total Ion C.I. % | Best Ion Score | Best Ion C.I.% | % Coverage |                            |
|------------------------------------------------------|---------------|---------------|---------------|---------------------|-----------------|------------------|----------------|----------------|------------|----------------------------|
| Guanine nucleotide binding protein, beta polypeptide | cr CP49190    | 7             | 154           | 100                 | 102             |                  | 100            | 62             | 99.973     | 17.4                       |
| Peptide Information                                  | Calc. Mass    | Obsrv. Mass   | ± da          | ± ppm               | Start Seq.      | End Seq.         | Sequence       | Ion Score      | C. I. %    | Modification               |
|                                                      | 804.4509      | 804.4944      | 0.0435        | 54                  | 43              | 48               | IQMRTR         |                |            |                            |
|                                                      | 804.4509      | 804.4944      | 0.0435        | 54                  | 43              | 48               | IQMRTR         |                |            |                            |
|                                                      | 873.4424      | 873.4691      | 0.0267        | 31                  | 9               | 15               | QEAEQLR        |                |            |                            |
|                                                      | 873.4424      | 873.4691      | 0.0267        | 31                  | 9               | 15               | QEAEQLR        | 29             | 54.248     |                            |
|                                                      | 916.4958      | 916.5026      | 0.0068        | 7                   | 130             | 137              | EGNVRVSR       | 7              | 0          |                            |
|                                                      | 916.4958      | 916.5026      | 0.0068        | 7                   | 130             | 137              | EGNVRVSR       |                |            |                            |
|                                                      | 1009.5173     | 1009.5516     | 0.0343        | 34                  | 305             | 314              | AGVLAGHDNR     | 62             | 99.973     |                            |
|                                                      | 1009.5173     | 1009.5516     | 0.0343        | 34                  | 305             | 314              | AGVLAGHDNR     |                |            |                            |
|                                                      | 1352.6052     | 1352.6326     | 0.0274        | 20                  | 58              | 68               | IYAMHWGTDSR    | 11             | 0          | Oxidation (M)[4]           |
|                                                      | 1352.6052     | 1352.6326     | 0.0274        | 20                  | 58              | 68               | IYAMHWGTDSR    |                |            | Oxidation (M)[4]           |
|                                                      | 1384.7291     | 1384.6261     | -0.103        | -74                 | 9               | 19               | QEAEQLRNQIR    |                |            |                            |
|                                                      | 1384.7291     | 1384.6261     | -0.103        | -74                 | 9               | 19               | QEAEQLRNQIR    |                |            |                            |
|                                                      | 1549.6886     | 1549.7334     | 0.0448        | 29                  | 138             | 150              | ELPGHTGYLSCCR  |                |            | Carbamidomethyl (C)[11,12] |
|                                                      | 1549.6886     | 1549.7334     | 0.0448        | 29                  | 138             | 150              | ELPGHTGYLSCCR  |                |            | Carbamidomethyl (C)[11,12] |

| Protein Name                    | Accession No.  | Peptide Count | Protein Score | Protein Score C.I.% | Total Ion Score | Total Ion C.I. % | Best Ion Score            | Best Ion C.I.% | % Coverage |                        |
|---------------------------------|----------------|---------------|---------------|---------------------|-----------------|------------------|---------------------------|----------------|------------|------------------------|
| Similar to GAS2-related protein | rf XP_220783.1 | 7             | 62            | 97.984              |                 |                  | 12                        | 0              | 4.3        |                        |
| Peptide Information             | Calc. Mass     | Obsrv. Mass   | ± da          | ± ppm               | Start Seq.      | End Seq.         | Sequence                  | Ion Score      | C. I. %    | Modification           |
|                                 | 1031.5156      | 1031.6298     | 0.1142        | 111                 | 36              | 43               | EDLAEWLR                  |                |            |                        |
|                                 | 1126.6514      | 1126.5868     | -0.0646       | -57                 | 246             | 254              | ILRSHVMVR                 |                |            | Oxidation (M)[7]       |
|                                 | 1126.6514      | 1126.5868     | -0.0646       | -57                 | 246             | 254              | ILRSHVMVR                 |                |            | Oxidation (M)[7]       |
|                                 | 1258.6875      | 1258.6108     | -0.0767       | -61                 | 2               | 12               | SQHVHGHRKPR               |                |            |                        |
|                                 | 1258.7188      | 1258.6108     | -0.108        | -86                 | 146             | 156              | SVVLCLLELGR               | 12             | 0          | Carbamidomethyl (C)[5] |
|                                 | 1430.7598      | 1430.7333     | -0.0265       | -19                 | 802             | 817              | ATLGGTGGDVNGVGKK          |                |            |                        |
|                                 | 2384.218       | 2383.9966     | -0.2214       | -93                 | 613             | 634              | SQAIPRSGVYVPSLGGMWPEPR    |                |            |                        |
|                                 | 2717.365       | 2717.1282     | -0.2368       | -87                 | 87              | 111              | VQKIPMPQVGVFCNGAAQPGTFQAR |                |            | Oxidation (M)[6]       |

| Protein Name                                        | Accession No.  | Peptide Count | Protein Score | Protein Score C.I.% | Total Ion Score | Total Ion C.I. % | Best Ion Score | Best Ion C.I.% | % Coverage |                  |
|-----------------------------------------------------|----------------|---------------|---------------|---------------------|-----------------|------------------|----------------|----------------|------------|------------------|
| Tyrosine 3-monooxygenase/tryptophan 5-monooxygenase | rf NP_062250.1 | 6             | 164           | 100                 | 123             |                  | 100            | 85             | 100        | 22.7             |
| Peptide Information                                 | Calc. Mass     | Obsrv. Mass   | ± da          | ± ppm               | Start Seq.      | End Seq.         | Sequence       | Ion Score      | C. I. %    | Modification     |
|                                                     | 816.421        | 816.4495      | 0.0285        | 35                  | 13              | 19               | LAEQAER        |                |            |                  |
|                                                     | 816.421        | 816.4495      | 0.0285        | 35                  | 13              | 19               | LAEQAER        | 19             | 0          |                  |
|                                                     | 903.5145       | 903.5425      | 0.028         | 31                  | 62              | 69               | VISSIEQK       |                |            |                  |
|                                                     | 903.5145       | 903.5425      | 0.028         | 31                  | 62              | 69               | VISSIEQK       |                |            |                  |
|                                                     | 948.4243       | 948.462       | 0.0377        | 40                  | 126             | 132              | MKGDYYR        |                |            | Oxidation (M)[1] |
|                                                     | 948.4243       | 948.462       | 0.0377        | 40                  | 126             | 132              | MKGDYYR        |                |            | Oxidation (M)[1] |
|                                                     | 1080.5571      | 1080.5905     | 0.0334        | 31                  | 133             | 142              | YLAEVATGEK     |                |            |                  |
|                                                     | 1080.5571      | 1080.5905     | 0.0334        | 31                  | 133             | 142              | YLAEVATGEK     | 20             | 0          |                  |
|                                                     | 1134.5426      | 1134.578      | 0.0354        | 31                  | 153             | 162              | AYSEAHEISK     |                |            |                  |
|                                                     | 1643.7871      | 1643.8422     | 0.0551        | 34                  | 29              | 42               | NVTELNEPLSNEER | 85             | 100        |                  |
|                                                     | 1643.7871      | 1643.8422     | 0.0551        | 34                  | 29              | 42               | NVTELNEPLSNEER |                |            |                  |

| Protein Name | Accession No. | Peptide Count | Protein Score | Protein Score C.I.% | Total Ion Score | Total Ion C.I. % | Best Ion Score | Best Ion C.I.% | % Coverage |
|--------------|---------------|---------------|---------------|---------------------|-----------------|------------------|----------------|----------------|------------|
|--------------|---------------|---------------|---------------|---------------------|-----------------|------------------|----------------|----------------|------------|

Similar to RhoGDI-1 rfjXP\_340951.1 6 173 100 113 100 46 99.167 33.3

| Peptide Information |             |        |       |            |          |                  |           |         |                   |  |
|---------------------|-------------|--------|-------|------------|----------|------------------|-----------|---------|-------------------|--|
| Calc. Mass          | Obsrv. Mass | ± da   | ± ppm | Start Seq. | End Seq. | Sequence         | Ion Score | C. I. % | Modification      |  |
| 980.4948            | 980.54      | 0.0452 | 46    | 128        | 134      | YIQHTYR          | 46        | 99.167  |                   |  |
| 980.4948            | 980.54      | 0.0452 | 46    | 128        | 134      | YIQHTYR          |           |         |                   |  |
| 1261.5518           | 1261.5953   | 0.0435 | 34    | 142        | 152      | TDYMGVGSYGPR     |           |         | Oxidation (M)[4]  |  |
| 1261.5518           | 1261.5953   | 0.0435 | 34    | 142        | 152      | TDYMGVGSYGPR     | 16        | 0       | Oxidation (M)[4]  |  |
| 1617.7577           | 1617.8046   | 0.0469 | 29    | 139        | 152      | IDKTDYMGVGSYGPR  |           |         | Oxidation (M)[7]  |  |
| 1617.7577           | 1617.8046   | 0.0469 | 29    | 139        | 152      | IDKTDYMGVGSYGPR  |           |         | Oxidation (M)[7]  |  |
| 1650.9174           | 1650.9772   | 0.0598 | 36    | 59         | 74       | VAVSADPNVFNIVTR  |           |         |                   |  |
| 1650.9174           | 1650.9772   | 0.0598 | 36    | 59         | 74       | VAVSADPNVFNIVTR  | 35        | 90.506  |                   |  |
| 1799.8043           | 1799.8522   | 0.0479 | 27    | 153        | 167      | AEEYEFLLPMEEAPK  | 16        | 0       | Oxidation (M)[10] |  |
| 1799.8043           | 1799.8522   | 0.0479 | 27    | 153        | 167      | AEEYEFLLPMEEAPK  |           |         | Oxidation (M)[10] |  |
| 1917.9399           | 1918.007    | 0.0671 | 35    | 34         | 49       | SIQEIQELDKDDESLR |           |         |                   |  |

| Protein Score                                |               |               |               |       |                 |                  |                |                |            |      |
|----------------------------------------------|---------------|---------------|---------------|-------|-----------------|------------------|----------------|----------------|------------|------|
| Protein Name                                 | Accession No. | Peptide Count | Protein Score | C.I.% | Total Ion Score | Total Ion C.I. % | Best Ion Score | Best Ion C.I.% | % Coverage |      |
| Ubiquitin carboxyl-terminal hydrolase isozym | spt Q00981    | 6             | 96            | 100   | 44              |                  | 99.553         | 32             | 91.449     | 37.2 |

| Peptide Information |             |        |       |            |          |                       |           |         |                         |  |
|---------------------|-------------|--------|-------|------------|----------|-----------------------|-----------|---------|-------------------------|--|
| Calc. Mass          | Obsrv. Mass | ± da   | ± ppm | Start Seq. | End Seq. | Sequence              | Ion Score | C. I. % | Modification            |  |
| 886.4893            | 886.5276    | 0.0383 | 43    | 20         | 27       | LGVAGQWR              | 13        | 0       |                         |  |
| 886.4893            | 886.5276    | 0.0383 | 43    | 20         | 27       | LGVAGQWR              |           |         |                         |  |
| 981.4887            | 981.5199    | 0.0312 | 32    | 116        | 123      | QFLSETEK              |           |         |                         |  |
| 981.4887            | 981.5199    | 0.0312 | 32    | 116        | 123      | QFLSETEK              |           |         |                         |  |
| 1484.7955           | 1484.8298   | 0.0343 | 23    | 66         | 78       | QIEELKGQEVSPK         |           |         |                         |  |
| 1484.7955           | 1484.8298   | 0.0343 | 23    | 66         | 78       | QIEELKGQEVSPK         |           |         |                         |  |
| 1863.9012           | 1863.9526   | 0.0514 | 28    | 1          | 15       | MLQKPMEINPEMLNK       |           |         | Oxidation (M)[1,6,12]   |  |
| 1983.8937           | 1983.9548   | 0.0611 | 31    | 136        | 153      | NEAIQAAHDSVAQEGQCR    | 32        | 91.449  | Carbamidomethyl (C)[17] |  |
| 1983.8937           | 1983.9548   | 0.0611 | 31    | 136        | 153      | NEAIQAAHDSVAQEGQCR    |           |         | Carbamidomethyl (C)[17] |  |
| 2230.0444           | 2230.0852   | 0.0408 | 18    | 179        | 199      | MPFPVNHGASSEDSSLQDAAK |           |         | Oxidation (M)[1]        |  |
| 2230.0444           | 2230.0852   | 0.0408 | 18    | 179        | 199      | MPFPVNHGASSEDSSLQDAAK |           |         | Oxidation (M)[1]        |  |

| Protein Score                                |               |               |               |       |                 |                  |                |                |            |      |
|----------------------------------------------|---------------|---------------|---------------|-------|-----------------|------------------|----------------|----------------|------------|------|
| Protein Name                                 | Accession No. | Peptide Count | Protein Score | C.I.% | Total Ion Score | Total Ion C.I. % | Best Ion Score | Best Ion C.I.% | % Coverage |      |
| Ubiquitin carboxyl-terminal hydrolase isozym | spt Q00981    | 6             | 129           | 100   | 66              |                  | 99.996         | 28             | 78.515     | 37.2 |

| Peptide Information |             |        |       |            |          |                       |           |         |                         |  |
|---------------------|-------------|--------|-------|------------|----------|-----------------------|-----------|---------|-------------------------|--|
| Calc. Mass          | Obsrv. Mass | ± da   | ± ppm | Start Seq. | End Seq. | Sequence              | Ion Score | C. I. % | Modification            |  |
| 886.4893            | 886.5231    | 0.0338 | 38    | 20         | 27       | LGVAGQWR              |           |         |                         |  |
| 886.4893            | 886.5231    | 0.0338 | 38    | 20         | 27       | LGVAGQWR              | 10        | 0       |                         |  |
| 981.4887            | 981.5192    | 0.0305 | 31    | 116        | 123      | QFLSETEK              | 15        | 0       |                         |  |
| 981.4887            | 981.5192    | 0.0305 | 31    | 116        | 123      | QFLSETEK              |           |         |                         |  |
| 1484.7955           | 1484.829    | 0.0335 | 23    | 66         | 78       | QIEELKGQEVSPK         | 22        | 15.833  |                         |  |
| 1484.7955           | 1484.829    | 0.0335 | 23    | 66         | 78       | QIEELKGQEVSPK         |           |         |                         |  |
| 1863.9012           | 1863.9303   | 0.0291 | 16    | 1          | 15       | MLQKPMEINPEMLNK       |           |         | Oxidation (M)[1,6,12]   |  |
| 1863.9012           | 1863.9303   | 0.0291 | 16    | 1          | 15       | MLQKPMEINPEMLNK       |           |         | Oxidation (M)[1,6,12]   |  |
| 1983.8937           | 1983.9504   | 0.0567 | 29    | 136        | 153      | NEAIQAAHDSVAQEGQCR    |           |         | Carbamidomethyl (C)[17] |  |
| 1983.8937           | 1983.9504   | 0.0567 | 29    | 136        | 153      | NEAIQAAHDSVAQEGQCR    | 28        | 78.515  | Carbamidomethyl (C)[17] |  |
| 2230.0444           | 2230.0916   | 0.0472 | 21    | 179        | 199      | MPFPVNHGASSEDSSLQDAAK |           |         | Oxidation (M)[1]        |  |

| Protein Score                           |               |               |               |        |                 |                  |                |                |            |      |
|-----------------------------------------|---------------|---------------|---------------|--------|-----------------|------------------|----------------|----------------|------------|------|
| Protein Name                            | Accession No. | Peptide Count | Protein Score | C.I.%  | Total Ion Score | Total Ion C.I. % | Best Ion Score | Best Ion C.I.% | % Coverage |      |
| NADH-ubiquinone oxidoreductase 24 kDa s | spt P19234    | 4             | 65            | 99.078 | 20              |                  | 0              | 20             | 0          | 19.8 |

| Peptide Information |             |        |       |            |          |             |           |         |                   |  |
|---------------------|-------------|--------|-------|------------|----------|-------------|-----------|---------|-------------------|--|
| Calc. Mass          | Obsrv. Mass | ± da   | ± ppm | Start Seq. | End Seq. | Sequence    | Ion Score | C. I. % | Modification      |  |
| 872.4009            | 872.421     | 0.0201 | 23    | 61         | 67       | NYPEGHR     | 20        | 0       |                   |  |
| 872.4009            | 872.421     | 0.0201 | 23    | 61         | 67       | NYPEGHR     |           |         |                   |  |
| 1254.6875           | 1254.6981   | 0.0106 | 8     | 93         | 103      | VAEVLQVPPMR |           |         | Oxidation (M)[10] |  |
| 1254.6875           | 1254.6981   | 0.0106 | 8     | 93         | 103      | VAEVLQVPPMR |           |         | Oxidation (M)[10] |  |

|           |           |        |    |     |     |                    |
|-----------|-----------|--------|----|-----|-----|--------------------|
| 1276.6379 | 1276.6654 | 0.0275 | 22 | 136 | 146 | DSDSILETLQR        |
| 2398.0105 | 2398.0085 | -0.002 | -1 | 35  | 54  | DTPENNPDPDFTPENYER |

| Protein Name                    | Accession No.  | Peptide Count | Protein Score | Protein Score C.I.% | Total Ion Score | Total Ion C.I. % | Best Ion Score | Best Ion C.I.% | % Coverage |      |
|---------------------------------|----------------|---------------|---------------|---------------------|-----------------|------------------|----------------|----------------|------------|------|
| Similar to heme-binding protein | rf XP_342776.1 | 4             | 87            | 99.994              | 47              |                  | 99.558         | 28             | 61.958     | 18.9 |

| Peptide Information | Calc. Mass | Obsrv. Mass | ± da   | ± ppm | Start Seq. | End Seq. | Sequence           | Ion Score | C. I. % | Modification |
|---------------------|------------|-------------|--------|-------|------------|----------|--------------------|-----------|---------|--------------|
|                     | 1026.4375  | 1026.4305   | -0.007 | -7    | 27         | 34       | EDVSYEER           |           |         |              |
|                     | 1026.4375  | 1026.4305   | -0.007 | -7    | 27         | 34       | EDVSYEER           | 19        | 0       |              |
|                     | 1373.6808  | 1373.7048   | 0.024  | 17    | 141        | 152      | EADYVAHATQLR       | 28        | 61.958  |              |
|                     | 1373.6808  | 1373.7048   | 0.024  | 17    | 141        | 152      | EADYVAHATQLR       |           |         |              |
|                     | 1789.933   | 1789.9598   | 0.0268 | 15    | 41         | 56       | FATVEVTDKPVDEALR   |           |         |              |
|                     | 1926.9556  | 1926.9615   | 0.0059 | 3     | 104        | 121      | IPNQFQGSPPTPSDQSVK |           |         |              |
|                     | 1926.9556  | 1926.9615   | 0.0059 | 3     | 104        | 121      | IPNQFQGSPPTPSDQSVK |           |         |              |

| Protein Name    | Accession No. | Peptide Count | Protein Score | Protein Score C.I.% | Total Ion Score | Total Ion C.I. % | Best Ion Score | Best Ion C.I.% | % Coverage |      |
|-----------------|---------------|---------------|---------------|---------------------|-----------------|------------------|----------------|----------------|------------|------|
| Peroxiredoxin 6 | spt O35244    | 5             | 82            | 99.981              | 14              |                  | 0              | 14             | 0          | 24.1 |

| Peptide Information | Calc. Mass | Obsrv. Mass | ± da   | ± ppm | Start Seq. | End Seq. | Sequence      | Ion Score | C. I. % | Modification           |
|---------------------|------------|-------------|--------|-------|------------|----------|---------------|-----------|---------|------------------------|
|                     | 906.4679   | 906.5043    | 0.0364 | 40    | 155        | 161      | NFDEILR       |           |         |                        |
|                     | 906.4679   | 906.5043    | 0.0364 | 40    | 155        | 161      | NFDEILR       |           |         |                        |
|                     | 1191.6732  | 1191.7178   | 0.0446 | 37    | 144        | 154      | LSILYPATTGR   |           |         |                        |
|                     | 1191.6732  | 1191.7178   | 0.0446 | 37    | 144        | 154      | LSILYPATTGR   |           |         |                        |
|                     | 1328.7208  | 1328.7566   | 0.0358 | 27    | 97         | 107      | LFPFIIDDKDR   |           |         |                        |
|                     | 1328.7208  | 1328.7566   | 0.0358 | 27    | 97         | 107      | LFPFIIDDKDR   |           |         |                        |
|                     | 1363.6488  | 1363.6709   | 0.0221 | 16    | 84         | 96       | DINAYNGAAPTEK | 14        | 0       |                        |
|                     | 1363.6488  | 1363.6709   | 0.0221 | 16    | 84         | 96       | DINAYNGAAPTEK |           |         |                        |
|                     | 1395.6573  | 1395.6998   | 0.0425 | 30    | 41         | 52       | DFTPVCTTELGR  |           |         | Carbamidomethyl (C)[6] |
|                     | 1395.6573  | 1395.6998   | 0.0425 | 30    | 41         | 52       | DFTPVCTTELGR  |           |         | Carbamidomethyl (C)[6] |

| Protein Name    | Accession No. | Peptide Count | Protein Score | Protein Score C.I.% | Total Ion Score | Total Ion C.I. % | Best Ion Score | Best Ion C.I.% | % Coverage |
|-----------------|---------------|---------------|---------------|---------------------|-----------------|------------------|----------------|----------------|------------|
| Peroxiredoxin 6 | spt O35244    | 5             | 71            | 99.74               |                 |                  |                |                | 24.1       |

| Peptide Information | Calc. Mass | Obsrv. Mass | ± da   | ± ppm | Start Seq. | End Seq. | Sequence      | Ion Score | C. I. % | Modification           |
|---------------------|------------|-------------|--------|-------|------------|----------|---------------|-----------|---------|------------------------|
|                     | 906.4679   | 906.5007    | 0.0328 | 36    | 155        | 161      | NFDEILR       |           |         |                        |
|                     | 906.4679   | 906.5007    | 0.0328 | 36    | 155        | 161      | NFDEILR       |           |         |                        |
|                     | 1191.6732  | 1191.712    | 0.0388 | 33    | 144        | 154      | LSILYPATTGR   |           |         |                        |
|                     | 1191.6732  | 1191.712    | 0.0388 | 33    | 144        | 154      | LSILYPATTGR   |           |         |                        |
|                     | 1328.7208  | 1328.7632   | 0.0424 | 32    | 97         | 107      | LFPFIIDDKDR   |           |         |                        |
|                     | 1363.6488  | 1363.6837   | 0.0349 | 26    | 84         | 96       | DINAYNGAAPTEK |           |         |                        |
|                     | 1363.6488  | 1363.6837   | 0.0349 | 26    | 84         | 96       | DINAYNGAAPTEK |           |         |                        |
|                     | 1395.6573  | 1395.6978   | 0.0405 | 29    | 41         | 52       | DFTPVCTTELGR  |           |         | Carbamidomethyl (C)[6] |
|                     | 1395.6573  | 1395.6978   | 0.0405 | 29    | 41         | 52       | DFTPVCTTELGR  |           |         | Carbamidomethyl (C)[6] |

| Protein Name                             | Accession No.  | Peptide Count | Protein Score | Protein Score C.I.% | Total Ion Score | Total Ion C.I. % | Best Ion Score | Best Ion C.I.% | % Coverage |      |
|------------------------------------------|----------------|---------------|---------------|---------------------|-----------------|------------------|----------------|----------------|------------|------|
| Tyrosine 3-monooxygenase/tryptophan 5-mo | rf NP_062250.1 | 6             | 241           | 100                 | 201             |                  | 100            | 100            | 100        | 25.9 |

| Peptide Information | Calc. Mass | Obsrv. Mass | ± da   | ± ppm | Start Seq. | End Seq. | Sequence  | Ion Score | C. I. % | Modification     |
|---------------------|------------|-------------|--------|-------|------------|----------|-----------|-----------|---------|------------------|
|                     | 816.421    | 816.45      | 0.029  | 36    | 14         | 20       | LAEQAER   |           |         |                  |
|                     | 816.421    | 816.45      | 0.029  | 36    | 14         | 20       | LAEQAER   | 41        | 96.086  |                  |
|                     | 903.5145   | 903.5443    | 0.0298 | 33    | 63         | 70       | VISSIEQK  |           |         |                  |
|                     | 903.5145   | 903.5443    | 0.0298 | 33    | 63         | 70       | VISSIEQK  | 25        | 0       |                  |
|                     | 1124.5518  | 1124.5887   | 0.0369 | 33    | 161        | 169      | EMQPTHPIR | 19        | 0       | Oxidation (M)[2] |
|                     | 1124.5518  | 1124.5887   | 0.0369 | 33    | 161        | 169      | EMQPTHPIR |           |         | Oxidation (M)[2] |

|           |           |        |    |     |     |                |     |                    |
|-----------|-----------|--------|----|-----|-----|----------------|-----|--------------------|
| 1182.5637 | 1182.6002 | 0.0365 | 31 | 130 | 140 | YLSEVASGDNK    | 1   | 0                  |
| 1182.5637 | 1182.6002 | 0.0365 | 31 | 130 | 140 | YLSEVASGDNK    |     |                    |
| 1252.6467 | 1252.6851 | 0.0384 | 31 | 160 | 169 | KEMQPTTHPIR    |     | Oxidation (M)[3]   |
| 1252.6467 | 1252.6851 | 0.0384 | 31 | 160 | 169 | KEMQPTTHPIR    | 16  | 0 Oxidation (M)[3] |
| 1598.7405 | 1598.8007 | 0.0602 | 38 | 30  | 43  | AVTEQGHELSNEER |     |                    |
| 1598.7405 | 1598.8007 | 0.0602 | 38 | 30  | 43  | AVTEQGHELSNEER | 100 | 100                |

| Protein Name          | Accession No. | Peptide Count | Protein Score | Protein Score |                 | Total Ion Score | Total Ion C.I. % | Best Ion Score | Best Ion C.I. % | % Coverage |
|-----------------------|---------------|---------------|---------------|---------------|-----------------|-----------------|------------------|----------------|-----------------|------------|
|                       |               |               |               | C.I. %        | Total Ion Score |                 |                  |                |                 |            |
| Tropomyosin isoform 6 | cra rCP42035  | 10            | 247           | 100           | 139             | 100             | 35               | 90.121         | 27.8            |            |

| Peptide Information |             |        |       |            |          |                 |           |         |              |  |
|---------------------|-------------|--------|-------|------------|----------|-----------------|-----------|---------|--------------|--|
| Calc. Mass          | Obsrv. Mass | ± da   | ± ppm | Start Seq. | End Seq. | Sequence        | Ion Score | C. I. % | Modification |  |
| 802.4417            | 802.4799    | 0.0382 | 48    | 163        | 169      | NVTNNLK         |           |         |              |  |
| 832.441             | 832.4799    | 0.0389 | 47    | 98         | 104      | ALKDEEK         |           |         |              |  |
| 894.4679            | 894.5054    | 0.0375 | 42    | 125        | 131      | KYEEVAR         | 32        | 77.37   |              |  |
| 894.4679            | 894.5054    | 0.0375 | 42    | 126        | 132      | YEEVARK         |           |         |              |  |
| 940.4482            | 940.49      | 0.0418 | 44    | 117        | 124      | HIAEEADR        | 20        | 0       |              |  |
| 940.4482            | 940.49      | 0.0418 | 44    | 117        | 124      | HIAEEADR        |           |         |              |  |
| 1182.5525           | 1182.5864   | 0.0339 | 29    | 182        | 190      | EDKYEIEIK       |           |         |              |  |
| 1182.5525           | 1182.5864   | 0.0339 | 29    | 182        | 190      | EDKYEIEIK       |           |         |              |  |
| 1243.6528           | 1243.7018   | 0.049  | 39    | 56         | 65       | IQLVEEELDR      |           |         |              |  |
| 1243.6528           | 1243.7018   | 0.049  | 39    | 56         | 65       | IQLVEEELDR      |           |         |              |  |
| 1316.644            | 1316.6957   | 0.0517 | 39    | 43         | 54       | EQAAEVAASLNR    | 28        | 43.935  |              |  |
| 1316.644            | 1316.6957   | 0.0517 | 39    | 43         | 54       | EQAAEVAASLNR    |           |         |              |  |
| 1642.8031           | 1642.8552   | 0.0521 | 32    | 14         | 27       | IQVLQQQADDAEER  |           |         |              |  |
| 1642.8031           | 1642.8552   | 0.0521 | 32    | 14         | 27       | IQVLQQQADDAEER  | 35        | 90.121  |              |  |
| 1770.8981           | 1770.9525   | 0.0544 | 31    | 13         | 27       | KIQLVQQQADDAEER |           |         |              |  |
| 1770.8981           | 1770.9525   | 0.0544 | 31    | 13         | 27       | KIQLVQQQADDAEER | 24        | 0       |              |  |

| Protein Name            | Accession No.  | Peptide Count | Protein Score | Protein Score |                 | Total Ion Score | Total Ion C.I. % | Best Ion Score | Best Ion C.I. % | % Coverage |
|-------------------------|----------------|---------------|---------------|---------------|-----------------|-----------------|------------------|----------------|-----------------|------------|
|                         |                |               |               | C.I. %        | Total Ion Score |                 |                  |                |                 |            |
| Lactate dehydrogenase B | rf NP_036727.1 | 8             | 217           | 100           | 122             | 100             | 50               | 99.59          | 26.9            |            |

| Peptide Information |             |        |       |            |          |                  |           |         |                        |  |
|---------------------|-------------|--------|-------|------------|----------|------------------|-----------|---------|------------------------|--|
| Calc. Mass          | Obsrv. Mass | ± da   | ± ppm | Start Seq. | End Seq. | Sequence         | Ion Score | C. I. % | Modification           |  |
| 833.3747            | 833.415     | 0.0403 | 48    | 101        | 107      | QEGESR           |           |         |                        |  |
| 833.3747            | 833.415     | 0.0403 | 48    | 101        | 107      | QEGESR           |           |         |                        |  |
| 913.5828            | 913.6253    | 0.0425 | 47    | 92         | 100      | IVVVTAGVR        | 42        | 97.278  |                        |  |
| 913.5828            | 913.6253    | 0.0425 | 47    | 92         | 100      | IVVVTAGVR        |           |         |                        |  |
| 959.5519            | 959.5823    | 0.0304 | 32    | 300        | 308      | GLTSVINQK        |           |         |                        |  |
| 1186.6426           | 1186.699    | 0.0564 | 48    | 309        | 318      | LKDDEVAQLR       | 50        | 99.59   |                        |  |
| 1186.6426           | 1186.699    | 0.0564 | 48    | 309        | 318      | LKDDEVAQLR       |           |         |                        |  |
| 1248.6001           | 1248.6606   | 0.0605 | 48    | 159        | 170      | VIGSGCNLDSAR     | 30        | 58.226  | Carbamidomethyl (C)[6] |  |
| 1248.6001           | 1248.6606   | 0.0605 | 48    | 159        | 170      | VIGSGCNLDSAR     |           |         | Carbamidomethyl (C)[6] |  |
| 1510.7748           | 1510.8196   | 0.0448 | 30    | 78         | 91       | IVADKDYSVTANSK   |           |         |                        |  |
| 1510.8185           | 1510.8196   | 0.0011 | 1     | 234        | 246      | MVVDSAYEVIKLLK   |           |         | Oxidation (M)[1]       |  |
| 1666.8646           | 1666.9014   | 0.0368 | 22    | 8          | 23       | LIAPVADEETAVPNNK |           |         |                        |  |
| 1666.8646           | 1666.9014   | 0.0368 | 22    | 8          | 23       | LIAPVADEETAVPNNK |           |         |                        |  |

| Protein Name                          | Accession No. | Peptide Count | Protein Score | Protein Score |                 | Total Ion Score | Total Ion C.I. % | Best Ion Score | Best Ion C.I. % | % Coverage |
|---------------------------------------|---------------|---------------|---------------|---------------|-----------------|-----------------|------------------|----------------|-----------------|------------|
|                                       |               |               |               | C.I. %        | Total Ion Score |                 |                  |                |                 |            |
| Malate dehydrogenase 1, NAD (Soluble) | trm Q6PCV2    | 7             | 152           | 100           | 78              | 100             | 28               | 55.428         | 22.5            |            |

| Peptide Information |             |         |       |            |          |          |           |         |                        |  |
|---------------------|-------------|---------|-------|------------|----------|----------|-----------|---------|------------------------|--|
| Calc. Mass          | Obsrv. Mass | ± da    | ± ppm | Start Seq. | End Seq. | Sequence | Ion Score | C. I. % | Modification           |  |
| 811.442             | 811.4243    | -0.0177 | -22   | 249        | 255      | AISDHIR  | 28        | 48.351  |                        |  |
| 811.442             | 811.4243    | -0.0177 | -22   | 249        | 255      | AISDHIR  |           |         |                        |  |
| 935.4866            | 935.4739    | -0.0127 | -14   | 311        | 318      | EKMDLTAK |           |         |                        |  |
| 1026.4673           | 1026.4673   | 0       | 0     | 150        | 157      | ENFSCLTR |           |         | Carbamidomethyl (C)[5] |  |
| 1026.4673           | 1026.4673   | 0       | 0     | 150        | 157      | ENFSCLTR |           |         | Carbamidomethyl (C)[5] |  |



|           |           |         |    |     |     |                   |    |        |  |                         |
|-----------|-----------|---------|----|-----|-----|-------------------|----|--------|--|-------------------------|
| 1178.6165 | 1178.6185 | 0.002   | 2  | 221 | 230 | GEFITTVQQR        |    |        |  |                         |
| 1178.6165 | 1178.6185 | 0.002   | 2  | 221 | 230 | GEFITTVQQR        | 28 | 55.428 |  |                         |
| 1387.725  | 1387.7142 | -0.0108 | -8 | 80  | 92  | DLDAVAVLVGSMR     |    |        |  | Oxidation (M)[11]       |
| 1393.7111 | 1393.7131 | 0.002   | 1  | 299 | 310 | FVEGLPINDFSR      | 22 | 0      |  |                         |
| 1393.7111 | 1393.7131 | 0.002   | 1  | 299 | 310 | FVEGLPINDFSR      |    |        |  |                         |
| 1757.9214 | 1757.9094 | -0.012  | -7 | 126 | 142 | VIVVGNPANTNCLTASK |    |        |  | Carbamidomethyl (C)[12] |
| 1757.9214 | 1757.9094 | -0.012  | -7 | 126 | 142 | VIVVGNPANTNCLTASK |    |        |  | Carbamidomethyl (C)[12] |

| Protein Name          | Accession No. | Peptide Count | Protein Score |       |  | Total Ion Score | Total Ion C.I. % | Best Ion       |       |            |      |
|-----------------------|---------------|---------------|---------------|-------|--|-----------------|------------------|----------------|-------|------------|------|
|                       |               |               | Protein Score | C.I.% |  |                 |                  | Best Ion Score | C.I.% | % Coverage |      |
| Tubulin beta chain 15 | pir A25113    | 11            | 262           | 100   |  | 141             |                  | 100            | 39    | 93.593     | 25.2 |

| Peptide Information | Calc. Mass | Obsrv. Mass | ± da   | ± ppm | Start Seq. | End Seq. | Sequence          | Ion Score | C. I. % | Modification            |
|---------------------|------------|-------------|--------|-------|------------|----------|-------------------|-----------|---------|-------------------------|
|                     | 808.3471   | 808.3889    | 0.0418 | 52    | 157        | 162      | EEYPDR            |           |         |                         |
|                     | 808.3471   | 808.3889    | 0.0418 | 52    | 157        | 162      | EEYPDR            | 10        | 0       |                         |
|                     | 1028.5194  | 1028.5743   | 0.0549 | 53    | 351        | 359      | TAVCDIPPR         | 32        | 73.23   | Carbamidomethyl (C)[4]  |
|                     | 1028.5194  | 1028.5743   | 0.0549 | 53    | 351        | 359      | TAVCDIPPR         |           |         | Carbamidomethyl (C)[4]  |
|                     | 1077.5323  | 1077.5872   | 0.0549 | 51    | 155        | 162      | IREEYPDR          | 39        | 93.593  |                         |
|                     | 1077.5323  | 1077.5872   | 0.0549 | 51    | 155        | 162      | IREEYPDR          |           |         |                         |
|                     | 1097.4172  | 1097.4594   | 0.0422 | 38    | 298        | 306      | NMMAACDPR         |           |         | Oxidation (M)[2,3]      |
|                     | 1097.4172  | 1097.4594   | 0.0422 | 38    | 298        | 306      | NMMAACDPR         | 7         | 0       | Carbamidomethyl (C)[6]  |
|                     | 1130.5953  | 1130.6533   | 0.058  | 51    | 242        | 251      | FPQLNADLR         |           |         |                         |
|                     | 1130.5953  | 1130.6533   | 0.058  | 51    | 242        | 251      | FPQLNADLR         | 20        | 0       |                         |
|                     | 1159.6292  | 1159.6742   | 0.045  | 39    | 253        | 262      | LAVNMVFPFR        |           |         | Oxidation (M)[5]        |
|                     | 1159.6292  | 1159.6742   | 0.045  | 39    | 253        | 262      | LAVNMVFPFR        | 7         | 0       | Oxidation (M)[5]        |
|                     | 1245.5933  | 1245.6454   | 0.0521 | 42    | 381        | 390      | ISEQFTAMFR        | 8         | 0       | Oxidation (M)[8]        |
|                     | 1245.5933  | 1245.6454   | 0.0521 | 42    | 381        | 390      | ISEQFTAMFR        |           |         | Oxidation (M)[8]        |
|                     | 1355.6589  | 1355.7047   | 0.0458 | 34    | 47         | 58       | INVYYNEAAGNK      |           |         |                         |
|                     | 1355.6589  | 1355.7047   | 0.0458 | 34    | 47         | 58       | INVYYNEAAGNK      | 30        | 57.768  |                         |
|                     | 1462.6842  | 1462.7289   | 0.0447 | 31    | 325        | 336      | EVDEQMLNVQNK      |           |         | Oxidation (M)[6]        |
|                     | 1462.6842  | 1462.7289   | 0.0447 | 31    | 325        | 336      | EVDEQMLNVQNK      | 10        | 0       | Oxidation (M)[6]        |
|                     | 1631.8309  | 1631.8795   | 0.0486 | 30    | 63         | 77       | AILVDLEPGTMDSVR   | 8         | 0       | Oxidation (M)[11]       |
|                     | 1631.8309  | 1631.8795   | 0.0486 | 30    | 63         | 77       | AILVDLEPGTMDSVR   |           |         | Oxidation (M)[11]       |
|                     | 1822.9229  | 1822.9856   | 0.0627 | 34    | 3          | 19       | EIVHIQAGQCGNQIGAK |           |         | Carbamidomethyl (C)[10] |
|                     | 1822.9229  | 1822.9856   | 0.0627 | 34    | 3          | 19       | EIVHIQAGQCGNQIGAK |           |         | Carbamidomethyl (C)[10] |

| Protein Name          | Accession No. | Peptide Count | Protein Score |       |  | Total Ion Score | Total Ion C.I. % | Best Ion       |       |            |      |
|-----------------------|---------------|---------------|---------------|-------|--|-----------------|------------------|----------------|-------|------------|------|
|                       |               |               | Protein Score | C.I.% |  |                 |                  | Best Ion Score | C.I.% | % Coverage |      |
| Tubulin beta chain 15 | pir A25113    | 11            | 226           | 100   |  | 116             |                  | 100            | 38    | 92.025     | 25.2 |

| Peptide Information | Calc. Mass | Obsrv. Mass | ± da   | ± ppm | Start Seq. | End Seq. | Sequence     | Ion Score | C. I. % | Modification           |
|---------------------|------------|-------------|--------|-------|------------|----------|--------------|-----------|---------|------------------------|
|                     | 808.3471   | 808.3696    | 0.0225 | 28    | 157        | 162      | EEYPDR       |           |         |                        |
|                     | 808.3471   | 808.3696    | 0.0225 | 28    | 157        | 162      | EEYPDR       | 25        | 0       |                        |
|                     | 1028.5194  | 1028.5576   | 0.0382 | 37    | 351        | 359      | TAVCDIPPR    | 27        | 0       | Carbamidomethyl (C)[4] |
|                     | 1028.5194  | 1028.5576   | 0.0382 | 37    | 351        | 359      | TAVCDIPPR    |           |         | Carbamidomethyl (C)[4] |
|                     | 1077.5323  | 1077.5656   | 0.0333 | 31    | 155        | 162      | IREEYPDR     | 38        | 92.025  |                        |
|                     | 1077.5323  | 1077.5656   | 0.0333 | 31    | 155        | 162      | IREEYPDR     |           |         |                        |
|                     | 1097.4172  | 1097.4398   | 0.0226 | 21    | 298        | 306      | NMMAACDPR    |           |         | Oxidation (M)[2,3]     |
|                     | 1097.4172  | 1097.4398   | 0.0226 | 21    | 298        | 306      | NMMAACDPR    | 6         | 0       | Carbamidomethyl (C)[6] |
|                     | 1130.5953  | 1130.6327   | 0.0374 | 33    | 242        | 251      | FPQLNADLR    | 16        | 0       |                        |
|                     | 1130.5953  | 1130.6327   | 0.0374 | 33    | 242        | 251      | FPQLNADLR    |           |         |                        |
|                     | 1159.6292  | 1159.6541   | 0.0249 | 21    | 253        | 262      | LAVNMVFPFR   |           |         | Oxidation (M)[5]       |
|                     | 1159.6292  | 1159.6541   | 0.0249 | 21    | 253        | 262      | LAVNMVFPFR   | 9         | 0       | Oxidation (M)[5]       |
|                     | 1245.5933  | 1245.625    | 0.0317 | 25    | 381        | 390      | ISEQFTAMFR   |           |         | Oxidation (M)[8]       |
|                     | 1245.5933  | 1245.625    | 0.0317 | 25    | 381        | 390      | ISEQFTAMFR   |           |         | Oxidation (M)[8]       |
|                     | 1355.6589  | 1355.6829   | 0.024  | 18    | 47         | 58       | INVYYNEAAGNK |           |         |                        |
|                     | 1355.6589  | 1355.6829   | 0.024  | 18    | 47         | 58       | INVYYNEAAGNK |           |         |                        |
|                     | 1462.6842  | 1462.7075   | 0.0233 | 16    | 325        | 336      | EVDEQMLNVQNK |           |         | Oxidation (M)[6]       |

|           |           |        |    |     |     |                   |  |    |   |  |                         |
|-----------|-----------|--------|----|-----|-----|-------------------|--|----|---|--|-------------------------|
| 1462.6842 | 1462.7075 | 0.0233 | 16 | 325 | 336 | EVDEQMLNVQNK      |  |    |   |  | Oxidation (M)[6]        |
| 1631.8309 | 1631.8573 | 0.0264 | 16 | 63  | 77  | AILVDLEPGTMDSVR   |  |    |   |  | Oxidation (M)[11]       |
| 1631.8309 | 1631.8573 | 0.0264 | 16 | 63  | 77  | AILVDLEPGTMDSVR   |  | 10 | 0 |  | Oxidation (M)[11]       |
| 1822.9229 | 1822.9528 | 0.0299 | 16 | 3   | 19  | EIVHIQAGQCGNQIGAK |  |    |   |  | Carbamidomethyl (C)[10] |
| 1822.9229 | 1822.9528 | 0.0299 | 16 | 3   | 19  | EIVHIQAGQCGNQIGAK |  |    |   |  | Carbamidomethyl (C)[10] |

| Protein Name          | Accession No. | Peptide Count | Protein Score | Protein Score |     | Total Ion Score | Total Ion C.I. % | Best Ion Score | Best Ion C.I. % | % Coverage |      |
|-----------------------|---------------|---------------|---------------|---------------|-----|-----------------|------------------|----------------|-----------------|------------|------|
| Tubulin beta chain 15 | pir A25113    | 9             | 141           | C.I.%         | 100 | 63              |                  | 99.976         | 29              | 45.402     | 19.6 |

| Peptide Information | Calc. Mass | Obsrv. Mass | ± da   | ± ppm | Start Seq. | End Seq. | Sequence          | Ion Score | C. I. % | Modification            |
|---------------------|------------|-------------|--------|-------|------------|----------|-------------------|-----------|---------|-------------------------|
|                     | 808.3471   | 808.3726    | 0.0255 | 32    | 157        | 162      | EEYPDR            |           |         |                         |
|                     | 808.3471   | 808.3726    | 0.0255 | 32    | 157        | 162      | EEYPDR            |           |         |                         |
|                     | 1028.5194  | 1028.5568   | 0.0374 | 36    | 351        | 359      | TAVCDIPPR         |           |         | Carbamidomethyl (C)[4]  |
|                     | 1028.5194  | 1028.5568   | 0.0374 | 36    | 351        | 359      | TAVCDIPPR         | 23        | 0       | Carbamidomethyl (C)[4]  |
|                     | 1077.5323  | 1077.5574   | 0.0251 | 23    | 155        | 162      | IREEYPDR          |           |         |                         |
|                     | 1077.5323  | 1077.5574   | 0.0251 | 23    | 155        | 162      | IREEYPDR          | 29        | 45.402  |                         |
|                     | 1097.4172  | 1097.4406   | 0.0234 | 21    | 298        | 306      | NMMAACDPR         |           |         | Oxidation (M)[2,3]      |
|                     | 1130.5953  | 1130.6309   | 0.0356 | 31    | 242        | 251      | FPGQLNADLR        | 11        | 0       |                         |
|                     | 1130.5953  | 1130.6309   | 0.0356 | 31    | 242        | 251      | FPGQLNADLR        |           |         |                         |
|                     | 1245.5933  | 1245.6185   | 0.0252 | 20    | 381        | 390      | ISEQFTAMFR        |           |         | Oxidation (M)[8]        |
|                     | 1245.5933  | 1245.6185   | 0.0252 | 20    | 381        | 390      | ISEQFTAMFR        |           |         | Oxidation (M)[8]        |
|                     | 1355.6589  | 1355.6759   | 0.017  | 13    | 47         | 58       | INVYYNEAAGNK      |           |         |                         |
|                     | 1355.6589  | 1355.6759   | 0.017  | 13    | 47         | 58       | INVYYNEAAGNK      |           |         |                         |
|                     | 1462.6842  | 1462.6948   | 0.0106 | 7     | 325        | 336      | EVDEQMLNVQNK      |           |         | Oxidation (M)[6]        |
|                     | 1462.6842  | 1462.6948   | 0.0106 | 7     | 325        | 336      | EVDEQMLNVQNK      |           |         | Oxidation (M)[6]        |
|                     | 1822.9229  | 1822.9365   | 0.0136 | 7     | 3          | 19       | EIVHIQAGQCGNQIGAK |           |         | Carbamidomethyl (C)[10] |
|                     | 1822.9229  | 1822.9365   | 0.0136 | 7     | 3          | 19       | EIVHIQAGQCGNQIGAK |           |         | Carbamidomethyl (C)[10] |

| Protein Name | Accession No. | Peptide Count | Protein Score | Protein Score |     | Total Ion Score | Total Ion C.I. % | Best Ion Score | Best Ion C.I. % | % Coverage |      |
|--------------|---------------|---------------|---------------|---------------|-----|-----------------|------------------|----------------|-----------------|------------|------|
| Actin-beta   | pir ATRTC     | 11            | 300           | C.I.%         | 100 | 179             |                  | 100            | 94              | 100        | 32.3 |

| Peptide Information | Calc. Mass | Obsrv. Mass | ± da    | ± ppm | Start Seq. | End Seq. | Sequence           | Ion Score | C. I. % | Modification       |
|---------------------|------------|-------------|---------|-------|------------|----------|--------------------|-----------|---------|--------------------|
|                     | 800.5352   | 800.5504    | 0.0152  | 19    | 62         | 68       | RGILTLK            |           |         |                    |
|                     | 800.5352   | 800.5504    | 0.0152  | 19    | 62         | 68       | RGILTLK            |           |         |                    |
|                     | 976.4482   | 976.486     | 0.0378  | 39    | 19         | 28       | AGFAGDDAPR         | 45        | 98.847  |                    |
|                     | 976.4482   | 976.486     | 0.0378  | 39    | 19         | 28       | AGFAGDDAPR         |           |         |                    |
|                     | 1132.527   | 1132.567    | 0.04    | 35    | 197        | 206      | GYSFTTTAER         | 41        | 96.994  |                    |
|                     | 1132.527   | 1132.567    | 0.04    | 35    | 197        | 206      | GYSFTTTAER         |           |         |                    |
|                     | 1177.6133  | 1177.6304   | 0.0171  | 15    | 316        | 326      | EITALAPSTMK        |           |         | Oxidation (M)[10]  |
|                     | 1198.5222  | 1198.5483   | 0.0261  | 22    | 51         | 61       | DSYVGDEAQS         |           |         |                    |
|                     | 1198.7054  | 1198.5483   | -0.1571 | -131  | 29         | 39       | AVFPSIVGRPR        |           |         |                    |
|                     | 1203.5609  | 1203.5763   | 0.0154  | 13    | 40         | 50       | HQGMVMGMGQK        |           |         | Oxidation (M)[5,8] |
|                     | 1203.5609  | 1203.5763   | 0.0154  | 13    | 40         | 50       | HQGMVMGMGQK        |           |         | Oxidation (M)[5,8] |
|                     | 1516.7026  | 1516.7467   | 0.0441  | 29    | 360        | 372      | QEYDESGPSIVHR      |           |         |                    |
|                     | 1516.7026  | 1516.7467   | 0.0441  | 29    | 360        | 372      | QEYDESGPSIVHR      | 94        | 100     |                    |
|                     | 1548.8125  | 1548.7407   | -0.0718 | -46   | 313        | 326      | MQKEITALAPSTMK     |           |         |                    |
|                     | 1548.8125  | 1548.7407   | -0.0718 | -46   | 313        | 326      | MQKEITALAPSTMK     |           |         |                    |
|                     | 1790.8918  | 1790.9406   | 0.0488  | 27    | 239        | 254      | SYELPDGQVITIGNER   |           |         |                    |
|                     | 1790.8918  | 1790.9406   | 0.0488  | 27    | 239        | 254      | SYELPDGQVITIGNER   |           |         |                    |
|                     | 1954.0643  | 1954.0962   | 0.0319  | 16    | 96         | 113      | VAPEEHPVLLTEAPLNPK |           |         |                    |
|                     | 1954.0643  | 1954.0962   | 0.0319  | 16    | 96         | 113      | VAPEEHPVLLTEAPLNPK |           |         |                    |

| Protein Name                             | Accession No.  | Peptide Count | Protein Score | Protein Score |     | Total Ion Score | Total Ion C.I. % | Best Ion Score | Best Ion C.I. % | % Coverage |      |
|------------------------------------------|----------------|---------------|---------------|---------------|-----|-----------------|------------------|----------------|-----------------|------------|------|
| Tyrosine 3-monooxygenase/tryptophan 5-mo | rf NP_062250.1 | 10            | 172           | C.I.%         | 100 | 68              |                  | 99.994         | 46              | 99.019     | 38.4 |

| Calc. Mass | Obsrv. Mass | ± da   | ± ppm | Start Seq. | End Seq. | Sequence          | Ion Score | C. I. % | Modification             |
|------------|-------------|--------|-------|------------|----------|-------------------|-----------|---------|--------------------------|
| 816.421    | 816.4512    | 0.0302 | 37    | 13         | 19       | LAEQAER           |           |         |                          |
| 816.421    | 816.4512    | 0.0302 | 37    | 13         | 19       | LAEQAER           | 22        | 0       |                          |
| 917.5302   | 917.5606    | 0.0304 | 33    | 62         | 69       | IISSEIQK          |           |         |                          |
| 917.5302   | 917.5606    | 0.0304 | 33    | 62         | 69       | IISSEIQK          |           |         |                          |
| 922.4199   | 922.4658    | 0.0459 | 50    | 124        | 130      | MKGDYHR           |           |         | Oxidation (M)[1]         |
| 1237.6536  | 1237.6909   | 0.0373 | 30    | 107        | 118      | HLIPAANTGESK      |           |         |                          |
| 1256.5906  | 1256.6464   | 0.0558 | 44    | 131        | 141      | YLAEFATGNDR       |           |         |                          |
| 1256.5906  | 1256.6464   | 0.0558 | 44    | 131        | 141      | YLAEFATGNDR       | 46        | 99.019  |                          |
| 1291.5544  | 1291.5896   | 0.0352 | 27    | 20         | 29       | YDEMVESMKK        |           |         | Oxidation (M)[4,8]       |
| 1384.6855  | 1384.7383   | 0.0528 | 38    | 131        | 142      | YLAEFATGNDRK      |           |         |                          |
| 1384.6855  | 1384.7383   | 0.0528 | 38    | 131        | 142      | YLAEFATGNDRK      |           |         |                          |
| 1463.7046  | 1463.7445   | 0.0399 | 27    | 30         | 42       | VAGMDVELTVEER     |           |         | Oxidation (M)[4]         |
| 1463.7046  | 1463.7445   | 0.0399 | 27    | 30         | 42       | VAGMDVELTVEER     |           |         | Oxidation (M)[4]         |
| 1476.7437  | 1476.7545   | 0.0108 | 7     | 95         | 106      | LICCDILDVLDK      |           |         | Carbamidomethyl (C)[3,4] |
| 1476.7437  | 1476.7545   | 0.0108 | 7     | 95         | 106      | LICCDILDVLDK      |           |         | Carbamidomethyl (C)[3,4] |
| 1819.9371  | 1819.9891   | 0.052  | 29    | 154        | 170      | AASDIAMTELPPTHPIR |           |         |                          |
| 1835.932   | 1835.9742   | 0.0422 | 23    | 154        | 170      | AASDIAMTELPPTHPIR |           |         | Oxidation (M)[7]         |
| 1835.932   | 1835.9742   | 0.0422 | 23    | 154        | 170      | AASDIAMTELPPTHPIR |           |         | Oxidation (M)[7]         |

| Protein Name | Accession No. | Peptide Count | Protein Score | Protein Score C.I.% | Total Ion Score | Total Ion C.I. % | Best Ion Score | Best Ion C.I.% | % Coverage |
|--------------|---------------|---------------|---------------|---------------------|-----------------|------------------|----------------|----------------|------------|
| SNAP-25b     | gb AAA99826.1 | 6             | 79            | 99.962              | 29              | 63.787           | 15             | 0              | 21.8       |

| Calc. Mass | Obsrv. Mass | ± da   | ± ppm | Start Seq. | End Seq. | Sequence           | Ion Score | C. I. % | Modification     |
|------------|-------------|--------|-------|------------|----------|--------------------|-----------|---------|------------------|
| 817.4315   | 817.5255    | 0.094  | 115   | 23         | 29       | ASHSFLR            | 10        | 0       |                  |
| 817.4315   | 817.5255    | 0.094  | 115   | 23         | 29       | ASHSFLR            | 15        | 0       |                  |
| 817.4315   | 817.5255    | 0.094  | 115   | 23         | 29       | ASHSFLR            |           |         |                  |
| 821.4263   | 821.5228    | 0.0965 | 117   | 30         | 37       | GLFGGNTR           |           |         |                  |
| 821.4263   | 821.5228    | 0.0965 | 117   | 30         | 37       | GLFGGNTR           |           |         |                  |
| 853.405    | 853.5078    | 0.1028 | 120   | 314        | 320      | EFDSISR            |           |         |                  |
| 853.405    | 853.5078    | 0.1028 | 120   | 314        | 320      | EFDSISR            |           |         |                  |
| 1482.7587  | 1482.9036   | 0.1449 | 98    | 217        | 229      | VAAYAAQLEQYQK      |           |         |                  |
| 1508.6362  | 1508.7842   | 0.148  | 98    | 277        | 288      | YEEMFPAFTDSR       | 14        | 0       | Oxidation (M)[4] |
| 1508.6362  | 1508.7842   | 0.148  | 98    | 277        | 288      | YEEMFPAFTDSR       |           |         | Oxidation (M)[4] |
| 1508.6362  | 1508.7842   | 0.148  | 98    | 277        | 288      | YEEMFPAFTDSR       | 14        | 0       | Oxidation (M)[4] |
| 2060.9771  | 2061.1677   | 0.1906 | 92    | 296        | 313      | LLEAHEEQNSEAYTEAVK |           |         |                  |

| Protein Name                               | Accession No. | Peptide Count | Protein Score | Protein Score C.I.% | Total Ion Score | Total Ion C.I. % | Best Ion Score | Best Ion C.I.% | % Coverage |
|--------------------------------------------|---------------|---------------|---------------|---------------------|-----------------|------------------|----------------|----------------|------------|
| alpha-soluble NSF attachment protein - rat | pir S58285    | 8             | 128           | 100                 | 50              | 99.791           | 37             | 95.862         | 31.5       |

| Calc. Mass | Obsrv. Mass | ± da   | ± ppm | Start Seq. | End Seq. | Sequence           | Ion Score | C. I. % | Modification           |
|------------|-------------|--------|-------|------------|----------|--------------------|-----------|---------|------------------------|
| 869.3999   | 869.5105    | 0.1106 | 127   | 265        | 271      | EYDSISR            |           |         |                        |
| 1175.5538  | 1175.6876   | 0.1338 | 114   | 286        | 295      | TIQGDDEEDLR        |           |         |                        |
| 1175.5538  | 1175.6876   | 0.1338 | 114   | 286        | 295      | TIQGDDEEDLR        | 9         | 0       |                        |
| 1184.5616  | 1184.6921   | 0.1305 | 110   | 107        | 116      | AI EIYDMGR         | 12        | 0       | Oxidation (M)[8]       |
| 1184.5616  | 1184.6921   | 0.1305 | 110   | 107        | 116      | AI EIYDMGR         |           |         | Oxidation (M)[8]       |
| 1253.583   | 1253.7241   | 0.1411 | 113   | 38         | 47       | IEEACEIYAR         | 13        | 0       | Carbamidomethyl (C)[5] |
| 1253.583   | 1253.7241   | 0.1411 | 113   | 38         | 47       | IEEACEIYAR         |           |         | Carbamidomethyl (C)[5] |
| 1418.6943  | 1418.8419   | 0.1476 | 104   | 7          | 19       | QAEAMALLAEAER      |           |         | Oxidation (M)[5]       |
| 1418.6943  | 1418.8419   | 0.1476 | 104   | 7          | 19       | QAEAMALLAEAER      |           |         | Oxidation (M)[5]       |
| 1460.6692  | 1460.8208   | 0.1516 | 104   | 228        | 239      | YEELFPAFSDSR       |           |         |                        |
| 1460.6692  | 1460.8208   | 0.1516 | 104   | 228        | 239      | YEELFPAFSDSR       | 26        | 42.345  |                        |
| 1460.6692  | 1460.8208   | 0.1516 | 104   | 228        | 239      | YEELFPAFSDSR       | 37        | 95.862  |                        |
| 1558.7173  | 1558.879    | 0.1617 | 104   | 141        | 153      | AI AHYEQSADYYK     |           |         |                        |
| 2090.9875  | 2091.1851   | 0.1976 | 95    | 247        | 264      | LLEAHEEQNVDSYTESVK |           |         |                        |

| Protein Name          | Accession No.  | Peptide Count | Protein Score | Protein Score C.I.% | Total Ion Score | Total Ion C.I. % | Best Ion Score | Best Ion C.I.% | % Coverage |
|-----------------------|----------------|---------------|---------------|---------------------|-----------------|------------------|----------------|----------------|------------|
| Heat shock protein 73 | rf NP_077327.1 | 15            | 246           | 100                 | 136             | 100              | 59             | 99.99          | 35.3       |

| Peptide Information |             |         |       |            |          |                                       |           |         |                      |  |
|---------------------|-------------|---------|-------|------------|----------|---------------------------------------|-----------|---------|----------------------|--|
| Calc. Mass          | Obsrv. Mass | ± da    | ± ppm | Start Seq. | End Seq. | Sequence                              | Ion Score | C. I. % | Modification         |  |
| 861.4424            | 861.4445    | 0.0021  | 2     | 252        | 258      | DISENKR                               |           |         |                      |  |
| 1197.6626           | 1197.6552   | -0.0074 | -6    | 459        | 469      | FELTGIPPAPR                           |           |         |                      |  |
| 1199.6742           | 1199.6726   | -0.0016 | -1    | 160        | 171      | DAGTIAGLNVLRL                         |           |         |                      |  |
| 1228.6281           | 1228.6282   | 0.0001  | 0     | 26         | 36       | VEIIANDQQNR                           |           |         |                      |  |
| 1253.6161           | 1253.6172   | 0.0011  | 1     | 302        | 311      | FEELNADLFR                            | 40        | 99.26   |                      |  |
| 1253.6161           | 1253.6172   | 0.0011  | 1     | 302        | 311      | FEELNADLFR                            |           |         |                      |  |
| 1426.6631           | 1426.6639   | 0.0008  | 1     | 77         | 88       | RFDDAVVQSDMK                          |           |         | Oxidation (M)[11]    |  |
| 1481.807            | 1481.8042   | -0.0028 | -2    | 329        | 342      | SQIHDIIVLVGGSTR                       |           |         |                      |  |
| 1487.7013           | 1487.7012   | -0.0001 | 0     | 37         | 49       | TTPSYVAFTDTER                         |           |         |                      |  |
| 1665.79             | 1665.7821   | -0.0079 | -5    | 57         | 71       | NQVAMNPTNTVFDK                        |           |         | Oxidation (M)[5]     |  |
| 1691.7256           | 1691.7229   | -0.0027 | -2    | 221        | 236      | STAGDTHLGGEDFDNR                      |           |         |                      |  |
| 1691.7256           | 1691.7229   | -0.0027 | -2    | 221        | 236      | STAGDTHLGGEDFDNR                      | 59        | 99.992  |                      |  |
| 1745.809            | 1745.8019   | -0.0071 | -4    | 584        | 597      | NQTAEKEEFEHQK                         |           |         |                      |  |
| 1981.9978           | 1981.9958   | -0.002  | -1    | 138        | 155      | TVTNAVVTVPAYFNDSQR                    |           |         |                      |  |
| 1981.9978           | 1981.9958   | -0.002  | -1    | 138        | 155      | TVTNAVVTVPAYFNDSQR                    | 38        | 98.814  |                      |  |
| 2774.3267           | 2774.3206   | -0.0061 | -2    | 424        | 447      | QTQTFTTYSDNQPGVLIQVYEGE               |           |         |                      |  |
| 2921.3708           | 2921.3591   | -0.0117 | -4    | 78         | 102      | FDDAVVQSDMKHWPFMVNDAGRPK              |           |         | Oxidation (M)[10,16] |  |
| 3346.499            | 3346.7026   | 0.2036  | 61    | 610        | 646      | LYQSAGGMPGGMPGGFPGGGAPPSGGASSGPTIEEVD |           |         |                      |  |

| Protein Name                              | Accession No. | Peptide Count | Protein Score | Protein Score C.I.% | Total Ion Score | Total Ion C.I. % | Best Ion Score | Best Ion C.I.% | % Coverage |
|-------------------------------------------|---------------|---------------|---------------|---------------------|-----------------|------------------|----------------|----------------|------------|
| ATPase, H transporting, lysosomal V1 subu | gi 16758754   | 16            | 135           | 100                 | 22              | 68.499           | 22             | 68.499         | 37.2       |

| Peptide Information |             |         |       |            |          |                         |           |         |                         |  |
|---------------------|-------------|---------|-------|------------|----------|-------------------------|-----------|---------|-------------------------|--|
| Calc. Mass          | Obsrv. Mass | ± da    | ± ppm | Start Seq. | End Seq. | Sequence                | Ion Score | C. I. % | Modification            |  |
| 873.4788            | 873.5046    | 0.0258  | 30    | 30         | 37       | EQALAVSR                |           |         |                         |  |
| 877.4526            | 877.4496    | -0.003  | -3    | 38         | 44       | NYLSQPR                 |           |         |                         |  |
| 1120.5303           | 1120.5336   | 0.0033  | 3     | 121        | 130      | TPVSEDMVLR              |           |         | Oxidation (M)[7]        |  |
| 1189.6323           | 1189.6432   | 0.0109  | 9     | 131        | 141      | VFNGSGKPIDR             |           |         |                         |  |
| 1298.6045           | 1298.6169   | 0.0124  | 10    | 110        | 120      | TSCEFTGDILR             |           |         | Carbamidomethyl (C)[3]  |  |
| 1338.6437           | 1338.6473   | 0.0036  | 3     | 461        | 471      | NFITQGPYENR             |           |         |                         |  |
| 1338.6437           | 1338.6473   | 0.0036  | 3     | 461        | 471      | NFITQGPYENR             | 22        | 68.499  |                         |  |
| 1437.7373           | 1437.7429   | 0.0056  | 4     | 495        | 506      | IPQSTLSEFYPR            |           |         |                         |  |
| 1556.8319           | 1556.8275   | -0.0044 | -3    | 68         | 81       | YAEIVHLTLDPGDK          |           |         |                         |  |
| 1593.8384           | 1593.8401   | 0.0017  | 1     | 494        | 506      | RIPQSTLSEFYPR           |           |         |                         |  |
| 1596.9108           | 1596.9133   | 0.0025  | 2     | 387        | 400      | QIYPPINVLPSLSR          |           |         |                         |  |
| 1647.9427           | 1647.9185   | -0.0242 | -15   | 49         | 64       | TVSGVNGPLVLDHVK         |           |         |                         |  |
| 1706.9113           | 1706.9103   | -0.001  | -1    | 472        | 485      | TVYETLDIGWQLLR          |           |         |                         |  |
| 1912.8785           | 1912.88     | 0.0015  | 1     | 322        | 337      | GFPGYMYTDLATYER         |           |         | Oxidation (M)[6]        |  |
| 1969.1304           | 1969.0571   | -0.0733 | -37   | 387        | 403      | QIYPPINVLPSLSRLMK       |           |         |                         |  |
| 1985.1252           | 1985.059    | -0.0662 | -33   | 387        | 403      | QIYPPINVLPSLSRLMK       |           |         | Oxidation (M)[16]       |  |
| 2048.0593           | 2048.0527   | -0.0066 | -3    | 8          | 29       | GIVNGAAPELVPVTTGGPMAGAR |           |         | Oxidation (M)[18]       |  |
| 2178.1487           | 2178.1467   | -0.002  | -1    | 189        | 208      | IPIFSAAGLPHNEIAAQICR    |           |         | Carbamidomethyl (C)[19] |  |

| Protein Name  | Accession No. | Peptide Count | Protein Score | Protein Score C.I.% | Total Ion Score | Total Ion C.I. % | Best Ion Score | Best Ion C.I.% | % Coverage |
|---------------|---------------|---------------|---------------|---------------------|-----------------|------------------|----------------|----------------|------------|
| Alpha enolase | spt P04764    | 12            | 131           | 100                 | 28              | 87.046           | 28             | 87.046         | 34.6       |

| Peptide Information |             |         |       |            |          |            |           |         |              |  |
|---------------------|-------------|---------|-------|------------|----------|------------|-----------|---------|--------------|--|
| Calc. Mass          | Obsrv. Mass | ± da    | ± ppm | Start Seq. | End Seq. | Sequence   | Ion Score | C. I. % | Modification |  |
| 806.4518            | 806.4489    | -0.0029 | -4    | 406        | 411      | YNQILR     |           |         |              |  |
| 840.4474            | 840.4874    | 0.04    | 48    | 422        | 428      | FAGRSFR    |           |         |              |  |
| 904.4622            | 904.4297    | -0.0325 | -36   | 412        | 419      | IEEELGSK   |           |         |              |  |
| 1143.6156           | 1143.6099   | -0.0057 | -5    | 183        | 192      | IGAEVYHNLK |           |         |              |  |
| 1143.6156           | 1143.6099   | -0.0057 | -5    | 183        | 192      | IGAEVYHNLK |           |         |              |  |

|           |           |         |     |     |     |                           |    |        |  |                    |
|-----------|-----------|---------|-----|-----|-----|---------------------------|----|--------|--|--------------------|
| 1406.7162 | 1406.6981 | -0.0181 | -13 | 15  | 27  | GNPTVEVDLYTAK             |    |        |  |                    |
| 1439.7417 | 1439.7305 | -0.0112 | -8  | 269 | 280 | YITPDQLADLYK              |    |        |  |                    |
| 1557.759  | 1557.7472 | -0.0118 | -8  | 358 | 371 | LAQSNQWGMVMSHR            |    |        |  | Oxidation (M)[10]  |
| 1804.9438 | 1804.9427 | -0.0011 | -1  | 32  | 49  | AAVPSGASTGIYEALR          | 28 | 87.046 |  |                    |
| 1804.9438 | 1804.9427 | -0.0011 | -1  | 32  | 49  | AAVPSGASTGIYEALR          |    |        |  |                    |
| 1928.9608 | 1928.9543 | -0.0065 | -3  | 162 | 178 | LAMQEFMILPVGASSFR         |    |        |  | Oxidation (M)[3,7] |
| 2047.0706 | 2047.0757 | 0.0051  | 2   | 306 | 325 | FTATAGIQVVGDDLTVTNPK      |    |        |  |                    |
| 2208.0278 | 2208.0503 | 0.0225  | 10  | 233 | 252 | AGYTDQVVIGMDVAASEFYR      |    |        |  | Oxidation (M)[11]  |
| 2662.3181 | 2662.375  | 0.0569  | 21  | 228 | 252 | SAIAKAGYTDQVVIGMDVAASEFYR |    |        |  |                    |

| Protein Name                   | Accession No. | Peptide Count | Protein Score | Protein Score |  | Total Ion Score | Total Ion C.I. % | Best Ion Score | Best Ion C.I. % | % Coverage |      |
|--------------------------------|---------------|---------------|---------------|---------------|--|-----------------|------------------|----------------|-----------------|------------|------|
|                                |               |               |               | C.I. %        |  |                 |                  |                |                 |            |      |
| NADH ubiquinone oxidoreductase | spt Q66HF1    | 13            | 113           | 100           |  | 39              |                  | 99.191         | 23              | 63.702     | 24.5 |

| Peptide Information | Calc. Mass | Obsrv. Mass | ± da    | ± ppm | Start Seq. | End Seq. | Sequence             | Ion Score | C. I. % | Modification            |
|---------------------|------------|-------------|---------|-------|------------|----------|----------------------|-----------|---------|-------------------------|
|                     |            |             |         |       |            |          |                      |           |         |                         |
|                     | 980.5887   | 980.5858    | -0.0029 | -3    | 608        | 617      | VAVTPPGLAR           |           |         |                         |
|                     | 1064.5524  | 1064.5524   | 0       | 0     | 409        | 417      | FEAPLFNAR            |           |         |                         |
|                     | 1064.5524  | 1064.5524   | 0       | 0     | 409        | 417      | FEAPLFNAR            | 23        | 63.702  |                         |
|                     | 1083.6156  | 1083.6133   | -0.0023 | -2    | 646        | 655      | LGEVSPNLVR           |           |         |                         |
|                     | 1401.7882  | 1401.7622   | -0.026  | -19   | 471        | 483      | KPMVVLGSSALQR        |           |         | Oxidation (M)[3]        |
|                     | 1403.7893  | 1403.7827   | -0.0066 | -5    | 429        | 441      | VALIGSPVDLTYR        |           |         |                         |
|                     | 1403.7893  | 1403.7827   | -0.0066 | -5    | 429        | 441      | VALIGSPVDLTYR        | 17        | 0       |                         |
|                     | 1505.8145  | 1505.8064   | -0.0081 | -5    | 544        | 557      | LLFLLGADGGCITR       |           |         | Carbamidomethyl (C)[11] |
|                     | 1558.786   | 1558.7782   | -0.0078 | -5    | 451        | 464      | ILQDIASGNHEFSK       |           |         |                         |
|                     | 1608.7864  | 1608.7776   | -0.0088 | -5    | 185        | 200      | FASEIAGVDDLGTTR      |           |         |                         |
|                     | 1611.8013  | 1611.7917   | -0.0096 | -6    | 312        | 325      | GLLTYTSWEDALSR       |           |         |                         |
|                     | 2008.9855  | 2008.9858   | 0.0003  | 0     | 248        | 266      | TESIDVMDAVGNSIVVSTR  |           |         | Oxidation (M)[7]        |
|                     | 2071.1545  | 2071.1531   | -0.0014 | -1    | 519        | 538      | IASQVAALDLGYKPGVEAIR |           |         |                         |
|                     | 2075.1018  | 2075.1086   | 0.0068  | 3     | 625        | 643      | ALSEIAGITLPYDLDQVR   |           |         |                         |

| Protein Name                   | Accession No. | Peptide Count | Protein Score | Protein Score |  | Total Ion Score | Total Ion C.I. % | Best Ion Score | Best Ion C.I. % | % Coverage |      |
|--------------------------------|---------------|---------------|---------------|---------------|--|-----------------|------------------|----------------|-----------------|------------|------|
|                                |               |               |               | C.I. %        |  |                 |                  |                |                 |            |      |
| NADH ubiquinone oxidoreductase | spt Q66HF1    | 12            | 117           | 100           |  | 53              |                  | 99.969         | 31              | 94.265     | 20.5 |

| Peptide Information | Calc. Mass | Obsrv. Mass | ± da    | ± ppm | Start Seq. | End Seq. | Sequence             | Ion Score | C. I. % | Modification            |
|---------------------|------------|-------------|---------|-------|------------|----------|----------------------|-----------|---------|-------------------------|
|                     |            |             |         |       |            |          |                      |           |         |                         |
|                     | 980.5887   | 980.5939    | 0.0052  | 5     | 608        | 617      | VAVTPPGLAR           |           |         |                         |
|                     | 1064.5524  | 1064.5625   | 0.0101  | 9     | 409        | 417      | FEAPLFNAR            |           |         |                         |
|                     | 1064.5524  | 1064.5625   | 0.0101  | 9     | 409        | 417      | FEAPLFNAR            | 23        | 61.761  |                         |
|                     | 1083.6156  | 1083.6208   | 0.0052  | 5     | 646        | 655      | LGEVSPNLVR           |           |         |                         |
|                     | 1401.7882  | 1401.7874   | -0.0008 | -1    | 471        | 483      | KPMVVLGSSALQR        |           |         | Oxidation (M)[3]        |
|                     | 1403.7893  | 1403.797    | 0.0077  | 5     | 429        | 441      | VALIGSPVDLTYR        |           |         |                         |
|                     | 1505.8145  | 1505.8259   | 0.0114  | 8     | 544        | 557      | LLFLLGADGGCITR       |           |         | Carbamidomethyl (C)[11] |
|                     | 1558.786   | 1558.7866   | 0.0006  | 0     | 451        | 464      | ILQDIASGNHEFSK       |           |         |                         |
|                     | 1608.7864  | 1608.7937   | 0.0073  | 5     | 185        | 200      | FASEIAGVDDLGTTR      | 31        | 94.265  |                         |
|                     | 1608.7864  | 1608.7937   | 0.0073  | 5     | 185        | 200      | FASEIAGVDDLGTTR      |           |         |                         |
|                     | 1942.0579  | 1941.9376   | -0.1203 | -62   | 540        | 557      | NPPKLLFLLGADGGCITR   |           |         | Carbamidomethyl (C)[15] |
|                     | 2071.1545  | 2071.156    | 0.0015  | 1     | 519        | 538      | IASQVAALDLGYKPGVEAIR |           |         |                         |
|                     | 2075.1018  | 2075.1094   | 0.0076  | 4     | 625        | 643      | ALSEIAGITLPYDLDQVR   |           |         |                         |

| Protein Name                         | Accession No. | Peptide Count | Protein Score | Protein Score |  | Total Ion Score | Total Ion C.I. % | Best Ion Score | Best Ion C.I. % | % Coverage |      |
|--------------------------------------|---------------|---------------|---------------|---------------|--|-----------------|------------------|----------------|-----------------|------------|------|
|                                      |               |               |               | C.I. %        |  |                 |                  |                |                 |            |      |
| RAB GDP dissociation inhibitor alpha | spt P50398    | 10            | 79            | 99.956        |  | 12              |                  | 0              | 13              | 0          | 26.0 |

| Peptide Information | Calc. Mass | Obsrv. Mass | ± da    | ± ppm | Start Seq. | End Seq. | Sequence  | Ion Score | C. I. % | Modification     |
|---------------------|------------|-------------|---------|-------|------------|----------|-----------|-----------|---------|------------------|
|                     |            |             |         |       |            |          |           |           |         |                  |
|                     | 1141.5922  | 1141.5793   | -0.0129 | -11   | 90         | 98       | MLLYTEVTR |           |         | Oxidation (M)[1] |

|           |           |         |     |     |     |                     |    |   |  |                        |
|-----------|-----------|---------|-----|-----|-----|---------------------|----|---|--|------------------------|
| 1476.7151 | 1476.6986 | -0.0165 | -11 | 56  | 68  | FQLLEGPPESMGR       |    |   |  | Oxidation (M)[11]      |
| 1476.7152 | 1476.6986 | -0.0166 | -11 | 279 | 290 | QLICDPSYIPDR        | 13 | 0 |  | Carbamidomethyl (C)[4] |
| 1484.6686 | 1484.6483 | -0.0203 | -14 | 157 | 169 | TFEGVDPQTTSMR       |    |   |  | Oxidation (M)[12]      |
| 1535.6617 | 1535.6385 | -0.0232 | -15 | 424 | 436 | MAGSAFDNFENMKR      |    |   |  | Oxidation (M)[1,11]    |
| 1852.8383 | 1852.8309 | -0.0074 | -4  | 194 | 208 | TDDYLDQPCLTINR      |    |   |  | Carbamidomethyl (C)[9] |
| 2141.1064 | 2141.1023 | -0.0041 | -2  | 222 | 240 | SPYLYPLYGLGELPQGFAR |    |   |  |                        |
| 2199.0571 | 2199.0647 | 0.0076  | 3   | 310 | 328 | NTNDANSCQIIPQNVNR   |    |   |  | Carbamidomethyl (C)[8] |
| 2211.0784 | 2211.1025 | 0.0241  | 11  | 119 | 138 | VPSTETEALASNLGMFVKR |    |   |  |                        |

| Protein Name                                | Accession No. | Peptide Count | Protein Score | Protein Score C.I.% | Total Ion Score | Total Ion C.I. % | Best Ion Score | Best Ion C.I.% | % Coverage |
|---------------------------------------------|---------------|---------------|---------------|---------------------|-----------------|------------------|----------------|----------------|------------|
| Dihydropyrimidinase related protein-2 (DRP) | spt P47942    | 10            | 85            | 99.989              |                 |                  |                |                | 26.6       |

| Peptide Information | Calc. Mass | Obsrv. Mass | ± da    | ± ppm | Start Seq. | End Seq. | Sequence                    | Ion Score | C. I. % | Modification     |
|---------------------|------------|-------------|---------|-------|------------|----------|-----------------------------|-----------|---------|------------------|
|                     | 908.4988   | 908.5001    | 0.0013  | 1     | 391        | 397      | VFNLVYPR                    |           |         |                  |
|                     | 1015.553   | 1015.5546   | 0.0016  | 2     | 259        | 268      | SAAEVIAQAR                  |           |         |                  |
|                     | 1310.6885  | 1310.6705   | -0.018  | -14   | 64         | 75       | MVIPGGIDVHTR                |           |         | Oxidation (M)[1] |
|                     | 1682.8707  | 1682.8474   | -0.0233 | -14   | 452        | 467      | IVLEDGTLHVTEGSGR            |           |         |                  |
|                     | 1682.8707  | 1682.8474   | -0.0233 | -14   | 452        | 467      | IVLEDGTLHVTEGSGR            |           |         |                  |
|                     | 1792.8348  | 1792.8163   | -0.0185 | -10   | 346        | 361      | DNFTLIPEGTNGTEER            |           |         |                  |
|                     | 1911.0222  | 1910.9924   | -0.0298 | -16   | 174        | 189      | FQLTDSQIYEVLSVIR            |           |         |                  |
|                     | 2169.0684  | 2169.0654   | -0.003  | -1    | 533        | 552      | NLHQSGFSLSGAQIDDNIPR        |           |         |                  |
|                     | 2297.144   | 2297.1951   | 0.0511  | 22    | 369        | 390      | AVVTGKMDENQFVAVTSTNAAK      |           |         | Oxidation (M)[7] |
|                     | 2377.1741  | 2377.1675   | -0.0066 | -3    | 190        | 211      | DIGAIAQVHAENGDIIEEQQR       |           |         |                  |
|                     | 2748.489   | 2748.3606   | -0.1284 | -47   | 441        | 467      | GSPLVVISQGKIVLEDGTLHVTEGSGR |           |         |                  |

| Protein Name                         | Accession No. | Peptide Count | Protein Score | Protein Score C.I.% | Total Ion Score | Total Ion C.I. % | Best Ion Score | Best Ion C.I.% | % Coverage |      |
|--------------------------------------|---------------|---------------|---------------|---------------------|-----------------|------------------|----------------|----------------|------------|------|
| RAB GDP dissociation inhibitor alpha | spt P50398    | 11            | 90            | 99.996              | 20              |                  | 32.249         | 21             | 45.733     | 30.4 |

| Peptide Information | Calc. Mass | Obsrv. Mass | ± da    | ± ppm | Start Seq. | End Seq. | Sequence            | Ion Score | C. I. % | Modification           |
|---------------------|------------|-------------|---------|-------|------------|----------|---------------------|-----------|---------|------------------------|
|                     | 938.4941   | 938.4986    | 0.0045  | 5     | 211        | 218      | LYSESLAR            |           |         |                        |
|                     | 1141.5922  | 1141.5775   | -0.0147 | -13   | 90         | 98       | MLLYTEVTR           |           |         | Oxidation (M)[1]       |
|                     | 1476.7151  | 1476.6938   | -0.0213 | -14   | 56         | 68       | FQLLEGPPESMGR       |           |         | Oxidation (M)[11]      |
|                     | 1476.7152  | 1476.6938   | -0.0214 | -14   | 279        | 290      | QLICDPSYIPDR        | 21        | 45.733  | Carbamidomethyl (C)[4] |
|                     | 1484.6686  | 1484.6429   | -0.0257 | -17   | 157        | 169      | TFEGVDPQTTSMR       |           |         | Oxidation (M)[12]      |
|                     | 1535.6617  | 1535.6338   | -0.0279 | -18   | 424        | 436      | MAGSAFDNFENMKR      |           |         | Oxidation (M)[1,11]    |
|                     | 1852.8383  | 1852.8224   | -0.0159 | -9    | 194        | 208      | TDDYLDQPCLTINR      |           |         | Carbamidomethyl (C)[9] |
|                     | 2141.1064  | 2141.1008   | -0.0056 | -3    | 222        | 240      | SPYLYPLYGLGELPQGFAR |           |         |                        |
|                     | 2199.0571  | 2199.0579   | 0.0008  | 0     | 310        | 328      | NTNDANSCQIIPQNVNR   |           |         | Carbamidomethyl (C)[8] |
|                     | 2211.0784  | 2211.104    | 0.0256  | 12    | 119        | 138      | VPSTETEALASNLGMFVKR |           |         |                        |
|                     | 2303.1189  | 2303.1267   | 0.0078  | 3     | 36         | 55       | NPYYGGESSITPLEELYKR |           |         |                        |

| Protein Name | Accession No. | Peptide Count | Protein Score | Protein Score C.I.% | Total Ion Score | Total Ion C.I. % | Best Ion Score | Best Ion C.I.% | % Coverage |      |
|--------------|---------------|---------------|---------------|---------------------|-----------------|------------------|----------------|----------------|------------|------|
| Actin-beta   | pir ATRTC     | 11            | 350           | 100                 | 255             |                  | 100            | 103            | 100        | 47.2 |

| Peptide Information | Calc. Mass | Obsrv. Mass | ± da    | ± ppm | Start Seq. | End Seq. | Sequence         | Ion Score | C. I. % | Modification |
|---------------------|------------|-------------|---------|-------|------------|----------|------------------|-----------|---------|--------------|
|                     | 800.5352   | 800.5499    | 0.0147  | 18    | 62         | 68       | RGILTLK          |           |         |              |
|                     | 976.4482   | 976.455     | 0.0068  | 7     | 19         | 28       | AGFAGDDAPR       |           |         |              |
|                     | 1132.527   | 1132.5284   | 0.0014  | 1     | 197        | 206      | GYSFTTTAER       | 53        | 99.956  |              |
|                     | 1132.527   | 1132.5284   | 0.0014  | 1     | 197        | 206      | GYSFTTTAER       |           |         |              |
|                     | 1198.7054  | 1198.6967   | -0.0087 | -7    | 29         | 39       | AVFPSIVGRPR      |           |         |              |
|                     | 1515.7491  | 1515.7312   | -0.0179 | -12   | 85         | 95       | IWHHTFYNELR      |           |         |              |
|                     | 1516.7026  | 1516.6971   | -0.0055 | -4    | 360        | 372      | QEYDESGPSIVHR    |           |         |              |
|                     | 1516.7026  | 1516.6971   | -0.0055 | -4    | 360        | 372      | QEYDESGPSIVHR    | 99        | 100     |              |
|                     | 1790.8918  | 1790.8792   | -0.0126 | -7    | 239        | 254      | SYELPDGQVITIGNER | 103       | 100     |              |
|                     | 1790.8918  | 1790.8792   | -0.0126 | -7    | 239        | 254      | SYELPDGQVITIGNER |           |         |              |

|           |           |         |     |     |     |                                      |                   |
|-----------|-----------|---------|-----|-----|-----|--------------------------------------|-------------------|
| 1954.0643 | 1954.0457 | -0.0186 | -10 | 96  | 113 | VAPEEHPVLLTEAPLNPK                   |                   |
| 2215.0698 | 2215.0786 | 0.0088  | 4   | 292 | 312 | DLYANTVLSGGTTMYPGIADR                |                   |
| 2231.0649 | 2231.0725 | 0.0076  | 3   | 292 | 312 | DLYANTVLSGGTTMYPGIADR                | Oxidation (M)[14] |
| 2746.4272 | 2746.353  | -0.0742 | -27 | 336 | 359 | KYSVWIGGSILASLSTFQQMWISK             | Oxidation (M)[20] |
| 3808.969  | 3808.9941 | 0.0251  | 7   | 148 | 183 | TTGIVMDSGDGVTHTVPIYEGYALPHAILRLDLAGR |                   |

| Protein Name                             | Accession No.  | Peptide Count | Protein Score | Protein Score C.I.% | Total Ion Score | Total Ion C.I. % | Best Ion Score | Best Ion C.I.% | % Coverage |
|------------------------------------------|----------------|---------------|---------------|---------------------|-----------------|------------------|----------------|----------------|------------|
| Tyrosine 3-monooxygenase/tryptophan 5-mo | rfjNP_062250.1 | 11            | 171           | 100                 | 74              | 100              | 74             | 100            | 45.7       |

| Peptide Information | Calc. Mass | Obsrv. Mass | ± da    | ± ppm | Start Seq. | End Seq. | Sequence            | Ion Score | C. I. % | Modification     |
|---------------------|------------|-------------|---------|-------|------------|----------|---------------------|-----------|---------|------------------|
|                     | 816.421    | 816.4277    | 0.0067  | 8     | 13         | 19       | LAEQAER             |           |         |                  |
|                     | 903.5145   | 903.5118    | -0.0027 | -3    | 62         | 69       | VISSIEQK            |           |         |                  |
|                     | 907.5247   | 907.5196    | -0.0051 | -6    | 43         | 50       | NLLSVAYK            |           |         |                  |
|                     | 948.4243   | 948.4242    | -0.0001 | 0     | 126        | 132      | MKGDYYR             |           |         | Oxidation (M)[1] |
|                     | 1080.5571  | 1080.5518   | -0.0053 | -5    | 133        | 142      | YLAEVATGEEK         |           |         |                  |
|                     | 1105.5847  | 1105.5801   | -0.0046 | -4    | 143        | 152      | RATVVESEK           |           |         |                  |
|                     | 1134.5426  | 1134.5349   | -0.0077 | -7    | 153        | 162      | AYSEAHEISK          |           |         |                  |
|                     | 1205.6559  | 1205.6426   | -0.0133 | -11   | 218        | 227      | DSTLIMQLLR          | 12        | 0       | Oxidation (M)[6] |
|                     | 1205.6559  | 1205.6426   | -0.0133 | -11   | 218        | 227      | DSTLIMQLLR          |           |         | Oxidation (M)[6] |
|                     | 1245.6157  | 1245.5728   | -0.0429 | -34   | 163        | 172      | EHMQPTHPIR          |           |         |                  |
|                     | 1643.7871  | 1643.7736   | -0.0135 | -8    | 29         | 42       | NVTELNEPLSNEER      |           |         |                  |
|                     | 1643.7871  | 1643.7736   | -0.0135 | -8    | 29         | 42       | NVTELNEPLSNEER      | 74        | 100     |                  |
|                     | 2130.9714  | 2130.968    | -0.0034 | -2    | 199        | 217      | TAFDDAIAELDTLNEDSYK |           |         |                  |

| Protein Name | Accession No.  | Peptide Count | Protein Score | Protein Score C.I.% | Total Ion Score | Total Ion C.I. % | Best Ion Score | Best Ion C.I.% | % Coverage |
|--------------|----------------|---------------|---------------|---------------------|-----------------|------------------|----------------|----------------|------------|
| SNAP-25B     | dbj BAA20152.1 | 7             | 63            | 98.47               |                 |                  |                |                | 7.5        |

| Peptide Information | Calc. Mass | Obsrv. Mass | ± da    | ± ppm | Start Seq. | End Seq. | Sequence            | Ion Score | C. I. % | Modification       |
|---------------------|------------|-------------|---------|-------|------------|----------|---------------------|-----------|---------|--------------------|
|                     | 831.4431   | 831.4389    | -0.0042 | -5    | 127        | 133      | RVTNDAR             |           |         |                    |
|                     | 1224.6041  | 1224.5969   | -0.0072 | -6    | 116        | 126      | EQMAISGGFIR         |           |         | Oxidation (M)[3]   |
|                     | 1434.6707  | 1434.6763   | 0.0056  | 4     | 9          | 21       | ADQLADESLESTR       |           |         |                    |
|                     | 1434.6707  | 1434.6763   | 0.0056  | 4     | 9          | 21       | ADQLADESLESTR       |           |         |                    |
|                     | 1590.7719  | 1590.7694   | -0.0025 | -2    | 9          | 22       | ADQLADESLESTRR      |           |         |                    |
|                     | 1676.8159  | 1676.8147   | -0.0012 | -1    | 37         | 50       | TLVMLDEQGEQLER      |           |         | Oxidation (M)[4]   |
|                     | 1676.8159  | 1676.8147   | -0.0012 | -1    | 37         | 50       | TLVMLDEQGEQLER      |           |         | Oxidation (M)[4]   |
|                     | 1776.7639  | 1776.7711   | 0.0072  | 4     | 153        | 167      | HMALDMGNEIDTQNR     |           |         | Oxidation (M)[2,6] |
|                     | 2176.0186  | 2176.0164   | -0.0022 | -1    | 134        | 152      | ENEMDENLEQVSGIIGNLR |           |         | Oxidation (M)[4]   |

| Protein Name | Accession No.   | Peptide Count | Protein Score | Protein Score C.I.% | Total Ion Score | Total Ion C.I. % | Best Ion Score | Best Ion C.I.% | % Coverage |
|--------------|-----------------|---------------|---------------|---------------------|-----------------|------------------|----------------|----------------|------------|
| Prohibitin   | rfj XP_346517.1 | 8             | 181           | 100                 | 109             | 100              | 59             | 99.99          | 27.9       |

| Peptide Information | Calc. Mass | Obsrv. Mass | ± da   | ± ppm | Start Seq. | End Seq. | Sequence        | Ion Score | C. I. % | Modification |
|---------------------|------------|-------------|--------|-------|------------|----------|-----------------|-----------|---------|--------------|
|                     | 1058.5225  | 1058.5286   | 0.0061 | 6     | 182        | 190      | QVAQQEAEER      |           |         |              |
|                     | 1062.5062  | 1062.5199   | 0.0137 | 13    | 144        | 152      | QVSDDLTER       |           |         |              |
|                     | 1149.5898  | 1149.5944   | 0.0046 | 4     | 129        | 138      | FDAGELITQR      |           |         |              |
|                     | 1149.5898  | 1149.5944   | 0.0046 | 4     | 129        | 138      | FDAGELITQR      | 50        | 99.906  |              |
|                     | 1185.6586  | 1185.6642   | 0.0056 | 5     | 79         | 88       | DLQNVNITLR      |           |         |              |
|                     | 1396.8423  | 1396.8464   | 0.0041 | 3     | 89         | 100      | ILFRPVASQLPR    |           |         |              |
|                     | 1460.6539  | 1460.6602   | 0.0063 | 4     | 101        | 112      | IYTSIGEDYDER    | 59        | 99.99   |              |
|                     | 1460.6539  | 1460.6602   | 0.0063 | 4     | 101        | 112      | IYTSIGEDYDER    |           |         |              |
|                     | 1478.7485  | 1478.7445   | -0.004 | -3    | 236        | 248      | LEAAEDIAIYQLSR  |           |         |              |
|                     | 1606.8435  | 1606.8468   | 0.0033 | 2     | 235        | 248      | KLEAAEDIAIYQLSR |           |         |              |

| Protein Name | Accession No. | Peptide Count | Protein Score | Protein Score C.I.% | Total Ion Score | Total Ion C.I. % | Best Ion Score | Best Ion C.I.% | % Coverage |
|--------------|---------------|---------------|---------------|---------------------|-----------------|------------------|----------------|----------------|------------|
|--------------|---------------|---------------|---------------|---------------------|-----------------|------------------|----------------|----------------|------------|

| Actin-beta          |             | pir ATRTC | 12    | 349        | 100      | 249                      |  | 100       | 86      | 100                | 40.8 |
|---------------------|-------------|-----------|-------|------------|----------|--------------------------|--|-----------|---------|--------------------|------|
| Peptide Information |             |           |       |            |          |                          |  |           |         |                    |      |
| Calc. Mass          | Obsrv. Mass | ± da      | ± ppm | Start Seq. | End Seq. | Sequence                 |  | Ion Score | C. I. % | Modification       |      |
| 800.5352            | 800.5437    | 0.0085    | 11    | 62         | 68       | RGILTLK                  |  |           |         |                    |      |
| 976.4482            | 976.4531    | 0.0049    | 5     | 19         | 28       | AGFAGDDAPR               |  |           |         |                    |      |
| 1132.527            | 1132.5366   | 0.0096    | 8     | 197        | 206      | GYSFTTTAER               |  | 59        | 99.991  |                    |      |
| 1132.527            | 1132.5366   | 0.0096    | 8     | 197        | 206      | GYSFTTTAER               |  |           |         |                    |      |
| 1198.7054           | 1198.7036   | -0.0018   | -2    | 29         | 39       | AVFPSIVGRPR              |  |           |         |                    |      |
| 1203.5609           | 1203.5533   | -0.0076   | -6    | 40         | 50       | HQGVMMVGMGQK             |  |           |         | Oxidation (M)[5,8] |      |
| 1515.7491           | 1515.7489   | -0.0002   | 0     | 85         | 95       | IWHHTFYNELR              |  |           |         |                    |      |
| 1516.7026           | 1516.7177   | 0.0151    | 10    | 360        | 372      | QEYDESGPSIVHR            |  |           |         |                    |      |
| 1516.7026           | 1516.7177   | 0.0151    | 10    | 360        | 372      | QEYDESGPSIVHR            |  | 84        | 100     |                    |      |
| 1790.8918           | 1790.892    | 0.0002    | 0     | 239        | 254      | SYELPDGQVITIGNER         |  | 86        | 100     |                    |      |
| 1790.8918           | 1790.892    | 0.0002    | 0     | 239        | 254      | SYELPDGQVITIGNER         |  |           |         |                    |      |
| 1954.0643           | 1954.0586   | -0.0057   | -3    | 96         | 113      | VAPEEHPVLLTEAPLNPK       |  |           |         |                    |      |
| 2215.0698           | 2215.074    | 0.0042    | 2     | 292        | 312      | DLYANTVLSGGTTMYPGIADR    |  |           |         |                    |      |
| 2231.0649           | 2231.0657   | 0.0008    | 0     | 292        | 312      | DLYANTVLSGGTTMYPGIADR    |  | 19        | 0       | Oxidation (M)[14]  |      |
| 2231.0649           | 2231.0657   | 0.0008    | 0     | 292        | 312      | DLYANTVLSGGTTMYPGIADR    |  |           |         | Oxidation (M)[14]  |      |
| 2359.1599           | 2359.147    | -0.0129   | -5    | 291        | 312      | KDLYANTVLSGGTTMYPGIADR   |  |           |         | Oxidation (M)[15]  |      |
| 2746.4272           | 2746.322    | -0.1052   | -38   | 336        | 359      | KYSVWIGGSILASLSTFQQMWISK |  |           |         | Oxidation (M)[20]  |      |

| Protein Name          |  | Accession No. | Peptide Count | Protein Score | Protein Score |  | Total Ion Score | Total Ion C.I. % | Best Ion |     | % Coverage |     |      |
|-----------------------|--|---------------|---------------|---------------|---------------|--|-----------------|------------------|----------|-----|------------|-----|------|
| Heat shock protein 73 |  | gi 13242237   | 10            | 385           | C.I.%         |  | 100             | 314              |          | 100 | 81         | 100 | 18.4 |

| Peptide Information |             |        |       |            |          |                    |  |           |         |              |  |
|---------------------|-------------|--------|-------|------------|----------|--------------------|--|-----------|---------|--------------|--|
| Calc. Mass          | Obsrv. Mass | ± da   | ± ppm | Start Seq. | End Seq. | Sequence           |  | Ion Score | C. I. % | Modification |  |
| 858.4567            | 858.4989    | 0.0422 | 49    | 312        | 319      | GTLDPVEK           |  |           |         |              |  |
| 993.5251            | 993.5446    | 0.0195 | 20    | 129        | 137      | EIAEAYLGK          |  |           |         |              |  |
| 1074.4851           | 1074.4883   | 0.0032 | 3     | 590        | 597      | EEFEHQQK           |  |           |         |              |  |
| 1074.4851           | 1074.4883   | 0.0032 | 3     | 590        | 597      | EEFEHQQK           |  | 17        | 0       |              |  |
| 1074.4851           | 1074.4883   | 0.0032 | 3     | 590        | 597      | EEFEHQQK           |  |           |         |              |  |
| 1199.6742           | 1199.6796   | 0.0054 | 5     | 160        | 171      | DAGTIAGLNVLR       |  | 1         | 0       |              |  |
| 1199.6742           | 1199.6796   | 0.0054 | 5     | 160        | 171      | DAGTIAGLNVLR       |  |           |         |              |  |
| 1228.6281           | 1228.6344   | 0.0063 | 5     | 26         | 36       | VEIANDQGGR         |  |           |         |              |  |
| 1228.6281           | 1228.6344   | 0.0063 | 5     | 26         | 36       | VEIANDQGGR         |  | 81        | 100     |              |  |
| 1253.6161           | 1253.6226   | 0.0065 | 5     | 302        | 311      | FEELNADLFR         |  |           |         |              |  |
| 1253.6161           | 1253.6226   | 0.0065 | 5     | 302        | 311      | FEELNADLFR         |  | 54        | 99.975  |              |  |
| 1481.807            | 1481.8123   | 0.0053 | 4     | 329        | 342      | SQIHDIIVLGGSTR     |  | 43        | 99.642  |              |  |
| 1481.807            | 1481.8123   | 0.0053 | 4     | 329        | 342      | SQIHDIIVLGGSTR     |  |           |         |              |  |
| 1487.7013           | 1487.7056   | 0.0043 | 3     | 37         | 49       | TTPSYVAFTDTER      |  |           | 55.959  |              |  |
| 1487.7013           | 1487.7056   | 0.0043 | 3     | 37         | 49       | TTPSYVAFTDTER      |  | 6         | 0       |              |  |
| 1487.7013           | 1487.7056   | 0.0043 | 3     | 37         | 49       | TTPSYVAFTDTER      |  |           |         |              |  |
| 1691.7256           | 1691.7275   | 0.0019 | 1     | 221        | 236      | STAGDTHLGGEDFDNR   |  |           |         |              |  |
| 1691.7256           | 1691.7275   | 0.0019 | 1     | 221        | 236      | STAGDTHLGGEDFDNR   |  | 60        | 99.992  |              |  |
| 1691.7256           | 1691.7275   | 0.0019 | 1     | 221        | 236      | STAGDTHLGGEDFDNR   |  | 6         | 0       |              |  |
| 1981.9978           | 1982.0051   | 0.0073 | 4     | 138        | 155      | TVTNAVVTVPAYFNDSQR |  |           |         |              |  |
| 1981.9978           | 1982.0051   | 0.0073 | 4     | 138        | 155      | TVTNAVVTVPAYFNDSQR |  |           |         |              |  |
| 1981.9978           | 1982.0051   | 0.0073 | 4     | 138        | 155      | TVTNAVVTVPAYFNDSQR |  | 36        | 98.042  |              |  |

| Protein Name          |  | Accession No. | Peptide Count | Protein Score | Protein Score |  | Total Ion Score | Total Ion C.I. % | Best Ion |     | % Coverage |     |      |
|-----------------------|--|---------------|---------------|---------------|---------------|--|-----------------|------------------|----------|-----|------------|-----|------|
| Heat shock protein 73 |  | gi 13242237   | 15            | 615           | C.I.%         |  | 100             | 496              |          | 100 | 128        | 100 | 27.6 |

| Peptide Information |             |         |       |            |          |          |  |           |         |              |  |
|---------------------|-------------|---------|-------|------------|----------|----------|--|-----------|---------|--------------|--|
| Calc. Mass          | Obsrv. Mass | ± da    | ± ppm | Start Seq. | End Seq. | Sequence |  | Ion Score | C. I. % | Modification |  |
| 858.4567            | 858.4993    | 0.0426  | 50    | 312        | 319      | GTLDPVEK |  |           |         |              |  |
| 861.4424            | 861.4445    | 0.0021  | 2     | 252        | 258      | DISENKR  |  | 31        | 93.737  |              |  |
| 861.4424            | 861.4445    | 0.0021  | 2     | 252        | 258      | DISENKR  |  |           |         |              |  |
| 930.5367            | 930.5312    | -0.0055 | -6    | 416        | 423      | RNTTIPTK |  |           |         |              |  |



|           |           |         |     |     |     |                         |     |        |  |  |
|-----------|-----------|---------|-----|-----|-----|-------------------------|-----|--------|--|--|
| 993.5251  | 993.5345  | 0.0094  | 9   | 129 | 137 | EIAEAYLGK               |     |        |  |  |
| 1074.4851 | 1074.4819 | -0.0032 | -3  | 590 | 597 | EEFEHQKQK               | 39  | 99.003 |  |  |
| 1074.4851 | 1074.4819 | -0.0032 | -3  | 590 | 597 | EEFEHQKQK               |     |        |  |  |
| 1081.5676 | 1081.5557 | -0.0119 | -11 | 349 | 357 | LLQDFFNQK               |     |        |  |  |
| 1197.6626 | 1197.6613 | -0.0013 | -1  | 459 | 469 | FELTGIPPAPR             |     |        |  |  |
| 1199.6742 | 1199.6758 | 0.0016  | 1   | 160 | 171 | DAGTIAGLNVLRL           |     |        |  |  |
| 1199.6742 | 1199.6758 | 0.0016  | 1   | 160 | 171 | DAGTIAGLNVLRL           | 10  | 0      |  |  |
| 1228.6281 | 1228.6284 | 0.0003  | 0   | 26  | 36  | VEIANDQQGNR             | 81  | 100    |  |  |
| 1228.6281 | 1228.6284 | 0.0003  | 0   | 26  | 36  | VEIANDQQGNR             |     |        |  |  |
| 1253.6161 | 1253.615  | -0.0011 | -1  | 302 | 311 | FEELNADLFR              | 73  | 100    |  |  |
| 1253.6161 | 1253.615  | -0.0011 | -1  | 302 | 311 | FEELNADLFR              |     |        |  |  |
| 1481.807  | 1481.807  | 0       | 0   | 329 | 342 | SQIHDIIVLVGGSTR         |     |        |  |  |
| 1481.807  | 1481.807  | 0       | 0   | 329 | 342 | SQIHDIIVLVGGSTR         | 43  | 99.556 |  |  |
| 1487.7013 | 1487.6978 | -0.0035 | -2  | 37  | 49  | TTPSYVAFTDTER           | 5   | 0      |  |  |
| 1487.7013 | 1487.6978 | -0.0035 | -2  | 37  | 49  | TTPSYVAFTDTER           | 32  | 94.52  |  |  |
| 1487.7013 | 1487.6978 | -0.0035 | -2  | 37  | 49  | TTPSYVAFTDTER           |     |        |  |  |
| 1691.7256 | 1691.7228 | -0.0028 | -2  | 221 | 236 | STAGDTHLGGEDFDNR        |     |        |  |  |
| 1691.7256 | 1691.7228 | -0.0028 | -2  | 221 | 236 | STAGDTHLGGEDFDNR        | 60  | 99.991 |  |  |
| 1691.7256 | 1691.7228 | -0.0028 | -2  | 221 | 236 | STAGDTHLGGEDFDNR        | 8   | 0      |  |  |
| 1981.9978 | 1982      | 0.0022  | 1   | 138 | 155 | TVTNAVVTVPAYFNDSQR      | 17  | 0      |  |  |
| 1981.9978 | 1982      | 0.0022  | 1   | 138 | 155 | TVTNAVVTVPAYFNDSQR      |     |        |  |  |
| 1981.9978 | 1982      | 0.0022  | 1   | 138 | 155 | TVTNAVVTVPAYFNDSQR      | 128 | 100    |  |  |
| 2774.3267 | 2774.3555 | 0.0288  | 10  | 424 | 447 | QTQFTTYSNDQPGVLIQVYEGER |     |        |  |  |

| Protein Name                                | Accession No. | Peptide Count | Protein Score | C.I.%  | Total Ion Score | Total Ion C.I. % | Best Ion Score | Best Ion C.I.% | % Coverage |
|---------------------------------------------|---------------|---------------|---------------|--------|-----------------|------------------|----------------|----------------|------------|
| Dihydropyrimidinase related protein-2 (DRP) | spt P47942    | 4             | 84            | 99.993 | 54              | 99.984           | 41             | 99.675         | 11.0       |

| Peptide Information | Calc. Mass | Obsrv. Mass | ± da    | ± ppm | Start Seq. | End Seq. | Sequence              | Ion Score | C. I. % | Modification |
|---------------------|------------|-------------|---------|-------|------------|----------|-----------------------|-----------|---------|--------------|
|                     | 1071.5906  | 1071.5784   | -0.0122 | -11   | 8          | 16       | NIPRITSDR             |           |         |              |
|                     | 1682.8707  | 1682.8469   | -0.0238 | -14   | 452        | 467      | IVLEDGTLHVTEGSGR      |           |         |              |
|                     | 1792.8348  | 1792.8136   | -0.0212 | -12   | 346        | 361      | DNFTLIPEGTNGTEER      |           |         |              |
|                     | 1792.8348  | 1792.8136   | -0.0212 | -12   | 346        | 361      | DNFTLIPEGTNGTEER      | 41        | 99.675  |              |
|                     | 2377.1741  | 2377.1936   | 0.0195  | 8     | 190        | 211      | DIGAIAQVHAENGDIIEEQQR |           |         |              |
|                     | 2377.1741  | 2377.1936   | 0.0195  | 8     | 190        | 211      | DIGAIAQVHAENGDIIEEQQR | 13        | 0       |              |

| Protein Name                                | Accession No. | Peptide Count | Protein Score | C.I.% | Total Ion Score | Total Ion C.I. % | Best Ion Score | Best Ion C.I.% | % Coverage |
|---------------------------------------------|---------------|---------------|---------------|-------|-----------------|------------------|----------------|----------------|------------|
| Dihydropyrimidinase related protein-2 (DRP) | spt P47942    | 10            | 387           | 100   | 313             | 100              | 71             | 100            | 27.1       |

| Peptide Information | Calc. Mass | Obsrv. Mass | ± da    | ± ppm | Start Seq. | End Seq. | Sequence         | Ion Score | C. I. % | Modification |
|---------------------|------------|-------------|---------|-------|------------|----------|------------------|-----------|---------|--------------|
|                     | 908.4988   | 908.4886    | -0.0102 | -11   | 391        | 397      | VFNLVYPR         | 38        | 99.14   |              |
|                     | 908.4988   | 908.4886    | -0.0102 | -11   | 391        | 397      | VFNLVYPR         | 29        | 92.511  |              |
|                     | 908.4988   | 908.4886    | -0.0102 | -11   | 391        | 397      | VFNLVYPR         |           |         |              |
|                     | 1015.553   | 1015.5515   | -0.0015 | -1    | 259        | 268      | SAAEVIAQAR       | 26        | 84.814  |              |
|                     | 1015.553   | 1015.5515   | -0.0015 | -1    | 259        | 268      | SAAEVIAQAR       |           |         |              |
|                     | 1140.6088  | 1140.6078   | -0.001  | -1    | 472        | 480      | KPFPDFVYK        |           |         |              |
|                     | 1140.6088  | 1140.6078   | -0.001  | -1    | 472        | 480      | KPFPDFVYK        | 18        | 16.547  |              |
|                     | 1294.6936  | 1294.7034   | 0.0098  | 8     | 64         | 75       | MVIPGGIDVHTR     | 18        | 6.795   |              |
|                     | 1294.6936  | 1294.7034   | 0.0098  | 8     | 64         | 75       | MVIPGGIDVHTR     |           |         |              |
|                     | 1682.8707  | 1682.8824   | 0.0117  | 7     | 452        | 467      | IVLEDGTLHVTEGSGR |           |         |              |
|                     | 1682.8707  | 1682.8824   | 0.0117  | 7     | 452        | 467      | IVLEDGTLHVTEGSGR | 45        | 99.809  |              |
|                     | 1682.8707  | 1682.8824   | 0.0117  | 7     | 452        | 467      | IVLEDGTLHVTEGSGR | 69        | 100     |              |
|                     | 1792.8348  | 1792.8494   | 0.0146  | 8     | 346        | 361      | DNFTLIPEGTNGTEER | 33        | 97.275  |              |
|                     | 1792.8348  | 1792.8494   | 0.0146  | 8     | 346        | 361      | DNFTLIPEGTNGTEER |           |         |              |
|                     | 1911.0222  | 1911.0306   | 0.0084  | 4     | 174        | 189      | FQLTDSQIYEVLSVIR |           |         |              |
|                     | 1911.0222  | 1911.0306   | 0.0084  | 4     | 174        | 189      | FQLTDSQIYEVLSVIR | 26        | 85.531  |              |
|                     | 1911.0222  | 1911.0306   | 0.0084  | 4     | 174        | 189      | FQLTDSQIYEVLSVIR |           |         |              |

|           |           |         |    |     |     |                            |    |     |  |  |
|-----------|-----------|---------|----|-----|-----|----------------------------|----|-----|--|--|
| 2169.0684 | 2169.0771 | 0.0087  | 4  | 533 | 552 | NLHQSGFSLSGAQIDDNIPR       |    |     |  |  |
| 2169.0684 | 2169.0771 | 0.0087  | 4  | 533 | 552 | NLHQSGFSLSGAQIDDNIPR       | 13 | 0   |  |  |
| 2377.1741 | 2377.179  | 0.0049  | 2  | 190 | 211 | DIGAIAQVHAENGDIIEEQQR      |    |     |  |  |
| 2377.1741 | 2377.179  | 0.0049  | 2  | 190 | 211 | DIGAIAQVHAENGDIIEEQQR      | 10 | 0   |  |  |
| 2377.1741 | 2377.179  | 0.0049  | 2  | 190 | 211 | DIGAIAQVHAENGDIIEEQQR      | 71 | 100 |  |  |
| 2900.5112 | 2900.49   | -0.0212 | -7 | 212 | 238 | ILDLGITGPEGHVLSRPEEVEAEVNR |    |     |  |  |

| Protein Name                                | Accession No. | Peptide Count | Protein Score |       |                | Total Ion Score | Total Ion C.I. % | Best Ion |      | % Coverage |
|---------------------------------------------|---------------|---------------|---------------|-------|----------------|-----------------|------------------|----------|------|------------|
|                                             |               |               | Protein Score | C.I.% | Best Ion Score |                 |                  | C.I.%    |      |            |
| Dihydropyrimidinase related protein-2 (DRP) | spt P47942    | 12            | 336           | 100   | 254            | 100             | 90               | 100      | 24.5 |            |

| Peptide Information |             |         |       |            |          |                       |           |         |              |  |
|---------------------|-------------|---------|-------|------------|----------|-----------------------|-----------|---------|--------------|--|
| Calc. Mass          | Obsrv. Mass | ± da    | ± ppm | Start Seq. | End Seq. | Sequence              | Ion Score | C. I. % | Modification |  |
| 844.4999            | 844.5272    | 0.0273  | 32    | 486        | 492      | SRLAELR               |           |         |              |  |
| 908.4988            | 908.504     | 0.0052  | 6     | 391        | 397      | VFNLVPR               | 44        | 99.81   |              |  |
| 908.4988            | 908.504     | 0.0052  | 6     | 391        | 397      | VFNLVPR               | 32        | 96.841  |              |  |
| 908.4988            | 908.504     | 0.0052  | 6     | 391        | 397      | VFNLVPR               |           |         |              |  |
| 1015.553            | 1015.56     | 0.007   | 7     | 259        | 268      | SAAEVIAQAR            | 54        | 99.979  |              |  |
| 1015.553            | 1015.56     | 0.007   | 7     | 259        | 268      | SAAEVIAQAR            |           |         |              |  |
| 1015.553            | 1015.56     | 0.007   | 7     | 259        | 268      | SAAEVIAQAR            | 58        | 99.991  |              |  |
| 1071.5906           | 1071.6365   | 0.0459  | 43    | 8          | 16       | NIPRITSDR             |           |         |              |  |
| 1084.6361           | 1084.6305   | -0.0056 | -5    | 441        | 451      | GSPLVVISQGK           |           |         |              |  |
| 1140.6088           | 1140.6045   | -0.0043 | -4    | 472        | 480      | KPFPDFVYK             |           |         |              |  |
| 1323.7631           | 1323.7603   | -0.0028 | -2    | 44         | 56       | QIGENLIVPGGVK         |           |         |              |  |
| 1563.7723           | 1563.7279   | -0.0444 | -28   | 497        | 511      | GLYDGPVCEVSVTPK       |           |         |              |  |
| 1682.8707           | 1682.8723   | 0.0016  | 1     | 452        | 467      | IVLEDGTLHVTEGSGR      | 90        | 100     |              |  |
| 1682.8707           | 1682.8723   | 0.0016  | 1     | 452        | 467      | IVLEDGTLHVTEGSGR      |           |         |              |  |
| 1682.8707           | 1682.8723   | 0.0016  | 1     | 452        | 467      | IVLEDGTLHVTEGSGR      |           |         |              |  |
| 1792.8348           | 1792.8348   | 0       | 0     | 346        | 361      | DNFTLIPEGTNGTEER      | 32        | 96.552  |              |  |
| 1792.8348           | 1792.8348   | 0       | 0     | 346        | 361      | DNFTLIPEGTNGTEER      |           |         |              |  |
| 2169.0684           | 2169.0657   | -0.0027 | -1    | 533        | 552      | NLHQSGFSLSGAQIDDNIPR  |           |         |              |  |
| 2377.1741           | 2377.1785   | 0.0044  | 2     | 190        | 211      | DIGAIAQVHAENGDIIEEQQR | 29        | 93.883  |              |  |
| 2377.1741           | 2377.1785   | 0.0044  | 2     | 190        | 211      | DIGAIAQVHAENGDIIEEQQR | 13        | 0       |              |  |
| 2377.1741           | 2377.1785   | 0.0044  | 2     | 190        | 211      | DIGAIAQVHAENGDIIEEQQR |           |         |              |  |

| Protein Name     | Accession No. | Peptide Count | Protein Score |       |                | Total Ion Score | Total Ion C.I. % | Best Ion |      | % Coverage |
|------------------|---------------|---------------|---------------|-------|----------------|-----------------|------------------|----------|------|------------|
|                  |               |               | Protein Score | C.I.% | Best Ion Score |                 |                  | C.I.%    |      |            |
| Alpha-internexin | spt P23565    | 15            | 399           | 100   | 270            | 100             | 60               | 99.99    | 29.8 |            |

| Peptide Information |             |        |       |            |          |            |           |         |              |  |
|---------------------|-------------|--------|-------|------------|----------|------------|-----------|---------|--------------|--|
| Calc. Mass          | Obsrv. Mass | ± da   | ± ppm | Start Seq. | End Seq. | Sequence   | Ion Score | C. I. % | Modification |  |
| 800.4624            | 800.4758    | 0.0134 | 17    | 162        | 168      | AQALLER    |           |         |              |  |
| 800.4624            | 800.4758    | 0.0134 | 17    | 162        | 168      | AQALLER    | 19        | 0       |              |  |
| 848.4624            | 848.4718    | 0.0094 | 11    | 139        | 145      | VGELFQR    | 3         | 0       |              |  |
| 848.4624            | 848.4718    | 0.0094 | 11    | 139        | 145      | VGELFQR    |           |         |              |  |
| 848.4624            | 848.4718    | 0.0094 | 11    | 139        | 145      | VGELFQR    |           |         |              |  |
| 917.4686            | 917.4779    | 0.0093 | 10    | 202        | 210      | DVDGATLAR  |           |         |              |  |
| 930.5254            | 930.5294    | 0.004  | 4     | 323        | 330      | TIEIEGLR   |           |         |              |  |
| 930.5254            | 930.5294    | 0.004  | 4     | 323        | 330      | TIEIEGLR   | 28        | 84.21   |              |  |
| 975.4529            | 975.4608    | 0.0079 | 8     | 310        | 316      | EEIHEYR    | 60        | 99.989  |              |  |
| 975.4529            | 975.4608    | 0.0079 | 8     | 310        | 316      | EEIHEYR    | 41        | 99.209  |              |  |
| 975.4529            | 975.4608    | 0.0079 | 8     | 310        | 316      | EEIHEYR    |           |         |              |  |
| 1016.5007           | 1016.5162   | 0.0155 | 15    | 169        | 177      | DGLAEVQR   |           |         |              |  |
| 1029.5575           | 1029.5594   | 0.0019 | 2     | 339        | 346      | QILELEER   | 29        | 85.466  |              |  |
| 1029.5575           | 1029.5594   | 0.0019 | 2     | 339        | 346      | QILELEER   |           |         |              |  |
| 1056.6047           | 1056.608    | 0.0033 | 3     | 121        | 130      | ALEAELALR  |           |         |              |  |
| 1056.6047           | 1056.608    | 0.0033 | 3     | 121        | 130      | ALEAELALR  | 58        | 99.983  |              |  |
| 1061.5222           | 1061.5334   | 0.0112 | 11    | 152        | 161      | AQLEEASSAR |           |         |              |  |
| 1072.5382           | 1072.5511   | 0.0129 | 12    | 96         | 104      | EQLQLNDR   |           |         |              |  |
| 1072.5382           | 1072.5511   | 0.0129 | 12    | 96         | 104      | EQLQLNDR   |           |         |              |  |

|           |           |        |   |     |     |                      |    |        |  |  |
|-----------|-----------|--------|---|-----|-----|----------------------|----|--------|--|--|
| 1124.5807 | 1124.587  | 0.0063 | 6 | 112 | 120 | VHQLETQNR            |    |        |  |  |
| 1124.5807 | 1124.587  | 0.0063 | 6 | 112 | 120 | VHQLETQNR            | 12 | 0      |  |  |
| 1133.5698 | 1133.5756 | 0.0058 | 5 | 291 | 300 | FANLNEQAAR           | 36 | 97.626 |  |  |
| 1133.5698 | 1133.5756 | 0.0058 | 5 | 291 | 300 | FANLNEQAAR           |    |        |  |  |
| 1390.7576 | 1390.7599 | 0.0023 | 2 | 217 | 228 | VESLLDELAFVR         |    |        |  |  |
| 1484.7704 | 1484.7705 | 0.0001 | 0 | 69  | 83  | LPASDGLDLSQAAAR      | 6  | 0      |  |  |
| 1484.7704 | 1484.7705 | 0.0001 | 0 | 69  | 83  | LPASDGLDLSQAAAR      | 27 | 79.136 |  |  |
| 1484.7704 | 1484.7705 | 0.0001 | 0 | 69  | 83  | LPASDGLDLSQAAAR      |    |        |  |  |
| 2175.0312 | 2175.0369 | 0.0057 | 3 | 347 | 366 | HSAEVAGYQDSIGQLESCLR |    |        |  |  |

| Protein Name        | Accession No. | Peptide Count | Protein Score |            |                | Total Ion Score      | Total Ion C.I. % | Best Ion |              | % Coverage |
|---------------------|---------------|---------------|---------------|------------|----------------|----------------------|------------------|----------|--------------|------------|
|                     |               |               | Protein Score | C.I.%      | Best Ion Score |                      |                  | C.I.%    |              |            |
| Alpha-internexin    | spt P23565    | 18            | 592           | 100        | 409            |                      | 100              | 81       | 100          | 36.4       |
| Peptide Information |               |               |               |            |                |                      |                  |          |              |            |
| Calc. Mass          | Obsrv. Mass   | ± da          | ± ppm         | Start Seq. | End Seq.       | Sequence             | Ion Score        | C. I. %  | Modification |            |
| 800.4624            | 800.4699      | 0.0075        | 9             | 162        | 168            | AQALLER              | 42               | 99.245   |              |            |
| 800.4624            | 800.4699      | 0.0075        | 9             | 162        | 168            | AQALLER              | 24               | 51.839   |              |            |
| 800.4624            | 800.4699      | 0.0075        | 9             | 162        | 168            | AQALLER              |                  |          |              |            |
| 848.4624            | 848.4682      | 0.0058        | 7             | 139        | 145            | VGELFQR              | 4                | 0        |              |            |
| 848.4624            | 848.4682      | 0.0058        | 7             | 139        | 145            | VGELFQR              |                  |          |              |            |
| 875.4216            | 875.4323      | 0.0107        | 12            | 331        | 338            | GANESLER             |                  |          |              |            |
| 917.4686            | 917.4716      | 0.003         | 3             | 202        | 210            | DVDGATLAR            |                  |          |              |            |
| 930.5254            | 930.5275      | 0.0021        | 2             | 323        | 330            | TIEIEGLR             |                  |          |              |            |
| 930.5254            | 930.5275      | 0.0021        | 2             | 323        | 330            | TIEIEGLR             | 44               | 99.498   |              |            |
| 975.4529            | 975.4576      | 0.0047        | 5             | 310        | 316            | EEIHEYR              | 60               | 99.987   |              |            |
| 975.4529            | 975.4576      | 0.0047        | 5             | 310        | 316            | EEIHEYR              |                  |          |              |            |
| 1016.5007           | 1016.5073     | 0.0066        | 6             | 169        | 177            | DGLAEVQR             |                  |          |              |            |
| 1029.5575           | 1029.5627     | 0.0052        | 5             | 339        | 346            | QILELEER             | 43               | 99.471   |              |            |
| 1029.5575           | 1029.5627     | 0.0052        | 5             | 339        | 346            | QILELEER             |                  |          |              |            |
| 1056.6047           | 1056.6089     | 0.0042        | 4             | 121        | 130            | ALEAELAAALR          |                  |          |              |            |
| 1056.6047           | 1056.6089     | 0.0042        | 4             | 121        | 130            | ALEAELAAALR          | 81               | 100      |              |            |
| 1061.5222           | 1061.5303     | 0.0081        | 8             | 152        | 161            | AQLEEASSAR           |                  |          |              |            |
| 1072.5382           | 1072.5437     | 0.0055        | 5             | 96         | 104            | EQLQGLNDR            | 43               | 99.426   |              |            |
| 1072.5382           | 1072.5437     | 0.0055        | 5             | 96         | 104            | EQLQGLNDR            |                  |          |              |            |
| 1121.5837           | 1121.5928     | 0.0091        | 8             | 378        | 386            | EYQDLLNVK            |                  |          |              |            |
| 1124.5807           | 1124.5861     | 0.0054        | 5             | 112        | 120            | VHQLETQNR            | 18               | 0        |              |            |
| 1124.5807           | 1124.5861     | 0.0054        | 5             | 112        | 120            | VHQLETQNR            |                  |          |              |            |
| 1133.5698           | 1133.5773     | 0.0075        | 7             | 291        | 300            | FANLNEQAAR           | 15               | 0        |              |            |
| 1133.5698           | 1133.5773     | 0.0075        | 7             | 291        | 300            | FANLNEQAAR           | 41               | 99.012   |              |            |
| 1133.5698           | 1133.5773     | 0.0075        | 7             | 291        | 300            | FANLNEQAAR           |                  |          |              |            |
| 1390.7576           | 1390.7623     | 0.0047        | 3             | 217        | 228            | VESLLDELAFVR         |                  |          |              |            |
| 1484.7704           | 1484.7736     | 0.0032        | 2             | 69         | 83             | LPASDGLDLSQAAAR      |                  |          |              |            |
| 1484.7704           | 1484.7736     | 0.0032        | 2             | 69         | 83             | LPASDGLDLSQAAAR      | 37               | 97.859   |              |            |
| 1484.7704           | 1484.7736     | 0.0032        | 2             | 69         | 83             | LPASDGLDLSQAAAR      | 23               | 34.13    |              |            |
| 1883.912            | 1883.9011     | -0.0109       | -6            | 471        | 487            | VGESFEETLEETVVSTK    |                  |          |              |            |
| 2175.0312           | 2175.0388     | 0.0076        | 3             | 347        | 366            | HSAEVAGYQDSIGQLESCLR |                  |          |              |            |

| Protein Name                       | Accession No. | Peptide Count | Protein Score |            |                | Total Ion Score | Total Ion C.I. % | Best Ion |              | % Coverage |
|------------------------------------|---------------|---------------|---------------|------------|----------------|-----------------|------------------|----------|--------------|------------|
|                                    |               |               | Protein Score | C.I.%      | Best Ion Score |                 |                  | C.I.%    |              |            |
| Heat shock 105kDa/110kDa protein 1 | gij 58865372  | 7             | 81            | 99.986     | 48             |                 | 99.89            | 29       | 91.083       | 9.3        |
| Peptide Information                |               |               |               |            |                |                 |                  |          |              |            |
| Calc. Mass                         | Obsrv. Mass   | ± da          | ± ppm         | Start Seq. | End Seq.       | Sequence        | Ion Score        | C. I. %  | Modification |            |
| 943.5206                           | 943.5269      | 0.0063        | 7             | 716        | 723            | VLEELGQR        | 29               | 91.083   |              |            |
| 943.5206                           | 943.5269      | 0.0063        | 7             | 716        | 723            | VLEELGQR        |                  |          |              |            |
| 1050.5691                          | 1050.5728     | 0.0037        | 4             | 774        | 782            | SLHQDPVVR       |                  |          |              |            |
| 1050.5691                          | 1050.5728     | 0.0037        | 4             | 774        | 782            | SLHQDPVVR       | 6                | 0        |              |            |
| 1161.5647                          | 1161.5685     | 0.0038        | 3             | 707        | 715            | FQEAERPR        |                  |          |              |            |
| 1161.5647                          | 1161.5685     | 0.0038        | 3             | 707        | 715            | FQEAERPR        |                  |          |              |            |

|           |           |        |   |     |     |                  |
|-----------|-----------|--------|---|-----|-----|------------------|
| 1161.5647 | 1161.5685 | 0.0038 | 3 | 707 | 715 | FQEAERPR         |
| 1282.6387 | 1282.6436 | 0.0049 | 4 | 186 | 196 | QDLPNADEKPR      |
| 1282.6387 | 1282.6436 | 0.0049 | 4 | 186 | 196 | QDLPNADEKPR      |
| 1461.718  | 1461.7216 | 0.0036 | 2 | 361 | 374 | DVSTTLNADEAVAR   |
| 1479.7074 | 1479.7104 | 0.003  | 2 | 20  | 33  | AGGIETIANEFSDR   |
| 1479.7074 | 1479.7104 | 0.003  | 2 | 20  | 33  | AGGIETIANEFSDR   |
| 1531.7961 | 1531.8008 | 0.0047 | 3 | 332 | 346 | TEEVSALIEIVGGATR |

13 0

| Protein Name      | Accession No. | Peptide Count | Protein Score |       |                | Total Ion Score | Total Ion C.I. % | Best Ion |      | % Coverage |
|-------------------|---------------|---------------|---------------|-------|----------------|-----------------|------------------|----------|------|------------|
|                   |               |               | Protein Score | C.I.% | Best Ion Score |                 |                  | C.I.%    |      |            |
| Guanine deaminase | trm Q9JKB7    | 10            | 658           | 100   | 584            | 100             | 146              | 100      | 21.6 |            |

| Calc. Mass | Obsrv. Mass | ± da    | ± ppm | Start Seq. | End Seq. | Sequence       | Ion Score | C. I. % | Modification |
|------------|-------------|---------|-------|------------|----------|----------------|-----------|---------|--------------|
| 909.588    | 909.5818    | -0.0062 | -7    | 206        | 213      | VKPIVTTPR      | 40        | 99.324  |              |
| 909.588    | 909.5818    | -0.0062 | -7    | 206        | 213      | VKPIVTTPR      |           |         |              |
| 949.4988   | 949.4901    | -0.0087 | -9    | 446        | 454      | QVVPFSSSV      |           |         |              |
| 949.4988   | 949.4901    | -0.0087 | -9    | 446        | 454      | QVVPFSSSV      |           |         |              |
| 998.4941   | 998.4921    | -0.002  | -2    | 428        | 435      | FLYLGDDDR      | 74        | 100     |              |
| 998.4941   | 998.4921    | -0.002  | -2    | 428        | 435      | FLYLGDDDR      | 74        | 100     |              |
| 998.4941   | 998.4921    | -0.002  | -2    | 428        | 435      | FLYLGDDDR      |           |         |              |
| 1058.6357  | 1058.6313   | -0.0044 | -4    | 6          | 14       | TPQLALIFR      |           |         |              |
| 1058.6357  | 1058.6313   | -0.0044 | -4    | 6          | 14       | TPQLALIFR      | 60        | 99.994  |              |
| 1107.568   | 1107.5548   | -0.0132 | -12   | 436        | 445      | NIEEVYVGK      |           |         |              |
| 1173.6262  | 1173.623    | -0.0032 | -3    | 394        | 403      | DFDALLINPR     |           |         |              |
| 1173.6262  | 1173.623    | -0.0032 | -3    | 394        | 403      | DFDALLINPR     | 38        | 99.056  |              |
| 1173.6262  | 1173.623    | -0.0032 | -3    | 394        | 403      | DFDALLINPR     | 69        | 100     |              |
| 1371.759   | 1371.7596   | 0.0006  | 0     | 371        | 384      | LATLGGSQALGLDR |           |         |              |
| 1371.759   | 1371.7596   | 0.0006  | 0     | 371        | 384      | LATLGGSQALGLDR | 94        | 100     |              |
| 1371.759   | 1371.7596   | 0.0006  | 0     | 371        | 384      | LATLGGSQALGLDR | 137       | 100     |              |
| 1436.7267  | 1436.7164   | -0.0103 | -7    | 42         | 53       | IVFLEESSQKEK   |           |         |              |
| 1436.7267  | 1436.7164   | -0.0103 | -7    | 42         | 53       | IVFLEESSQKEK   | 59        | 99.991  |              |
| 1544.7227  | 1544.7255   | 0.0028  | 2     | 114        | 126      | FQSTDVAEEVYTR  | 89        | 100     |              |
| 1544.7227  | 1544.7255   | 0.0028  | 2     | 114        | 126      | FQSTDVAEEVYTR  | 146       | 100     |              |
| 1544.7227  | 1544.7255   | 0.0028  | 2     | 114        | 126      | FQSTDVAEEVYTR  |           |         |              |
| 1712.8351  | 1712.8308   | -0.0043 | -3    | 232        | 245      | THDLYIQSHISENR |           |         |              |
| 1712.8351  | 1712.8308   | -0.0043 | -3    | 232        | 245      | THDLYIQSHISENR |           |         |              |

| Protein Name    | Accession No. | Peptide Count | Protein Score |       |                | Total Ion Score | Total Ion C.I. % | Best Ion |      | % Coverage |
|-----------------|---------------|---------------|---------------|-------|----------------|-----------------|------------------|----------|------|------------|
|                 |               |               | Protein Score | C.I.% | Best Ion Score |                 |                  | C.I.%    |      |            |
| Creatine kinase | gb AAA40932.1 | 9             | 429           | 100   | 346            | 100             | 97               | 100      | 28.6 |            |

| Calc. Mass | Obsrv. Mass | ± da    | ± ppm | Start Seq. | End Seq. | Sequence              | Ion Score | C. I. % | Modification |
|------------|-------------|---------|-------|------------|----------|-----------------------|-----------|---------|--------------|
| 983.4693   | 983.431     | -0.0383 | -39   | 216        | 223      | GIWHNDNK              |           |         |              |
| 983.4693   | 983.431     | -0.0383 | -39   | 216        | 223      | GIWHNDNK              |           |         |              |
| 983.4693   | 983.431     | -0.0383 | -39   | 216        | 223      | GIWHNDNK              |           |         |              |
| 1058.6105  | 1058.6376   | 0.0271  | 26    | 299        | 307      | LPHLGKHEK             |           |         |              |
| 1159.5491  | 1159.5507   | 0.0016  | 1     | 2          | 11       | PFSNSHNTQK            |           |         |              |
| 1232.6157  | 1232.615    | -0.0007 | -1    | 87         | 96       | DLPDPIIEDR            |           |         |              |
| 1232.6157  | 1232.615    | -0.0007 | -1    | 87         | 96       | DLPDPIIEDR            | 69        | 100     |              |
| 1254.5498  | 1254.55     | 0.0002  | 0     | 97         | 107      | HGGYQPSDEHK           | 34        | 97.492  |              |
| 1254.5498  | 1254.55     | 0.0002  | 0     | 97         | 107      | HGGYQPSDEHK           |           |         |              |
| 1303.7256  | 1303.7306   | 0.005   | 4     | 33         | 43       | VLTPELYAELR           | 22        | 65.853  |              |
| 1303.7256  | 1303.7306   | 0.005   | 4     | 33         | 43       | VLTPELYAELR           | 77        | 100     |              |
| 1303.7256  | 1303.7306   | 0.005   | 4     | 33         | 43       | VLTPELYAELR           |           |         |              |
| 1602.8334  | 1602.8363   | 0.0029  | 2     | 157        | 172      | LAVEALSSLDGDLSGR      | 97        | 100     |              |
| 1602.8334  | 1602.8363   | 0.0029  | 2     | 157        | 172      | LAVEALSSLDGDLSGR      | 10        | 0       |              |
| 1602.8334  | 1602.8363   | 0.0029  | 2     | 157        | 172      | LAVEALSSLDGDLSGR      |           |         |              |
| 1964.9308  | 1964.9358   | 0.005   | 3     | 321        | 341      | GTGGVDTAAVGGVDFVSNADR | 25        | 82.886  |              |

|           |           |        |   |     |     |                         |    |        |
|-----------|-----------|--------|---|-----|-----|-------------------------|----|--------|
| 1964.9308 | 1964.9358 | 0.005  | 3 | 321 | 341 | GTGGVDTAAVGGVFDVSNADR   |    |        |
| 1964.9308 | 1964.9358 | 0.005  | 3 | 321 | 341 | GTGGVDTAAVGGVFDVSNADR   | 9  | 0      |
| 2518.1692 | 2518.1831 | 0.0139 | 6 | 108 | 130 | TDLNPDNLQGGDDLDPN       |    |        |
| 2518.1692 | 2518.1831 | 0.0139 | 6 | 108 | 130 | TDLNPDNLQGGDDLDPNYVLSRR | 44 | 99.784 |
| 2518.1692 | 2518.1831 | 0.0139 | 6 | 108 | 130 | TDLNPDNLQGGDDLDPNYVLSRR |    |        |

| Protein Name        | Accession No. | Peptide Count | Protein Score | Protein Score C.I.% | Total Ion Score | Total Ion C.I. %   | Best Ion Score | Best Ion C.I.% | % Coverage   |      |
|---------------------|---------------|---------------|---------------|---------------------|-----------------|--------------------|----------------|----------------|--------------|------|
| Enolase 2, gamma    | gij26023949   | 6             | 142           | 100                 | 90              |                    | 100            | 68             | 99.999       | 14.7 |
| Peptide Information |               |               |               |                     |                 |                    |                |                |              |      |
| Calc. Mass          | Obsrv. Mass   | ± da          | ± ppm         | Start Seq.          | End Seq.        | Sequence           | Ion Score      | C. I. %        | Modification |      |
| 800.3824            | 800.3976      | 0.0152        | 19            | 257                 | 262             | YDLDFK             |                |                |              |      |
| 848.4161            | 848.4239      | 0.0078        | 9             | 423                 | 429             | FAGHNFR            |                |                |              |      |
| 848.4161            | 848.4239      | 0.0078        | 9             | 423                 | 429             | FAGHNFR            |                |                |              |      |
| 848.4161            | 848.4239      | 0.0078        | 9             | 423                 | 429             | FAGHNFR            |                |                |              |      |
| 1130.6204           | 1130.6077     | -0.0127       | -11           | 184                 | 193             | LGAEVYHTLK         |                |                |              |      |
| 1174.5586           | 1174.5623     | 0.0037        | 3             | 413                 | 422             | IEEELGEEAR         | 64             | 99.997         |              |      |
| 1174.5586           | 1174.5623     | 0.0037        | 3             | 413                 | 422             | IEEELGEEAR         |                |                |              |      |
| 1174.5586           | 1174.5623     | 0.0037        | 3             | 413                 | 422             | IEEELGEEAR         | 68             | 99.999         |              |      |
| 1380.7118           | 1380.705      | -0.0068       | -5            | 16                  | 28              | GNPTVEVDLHTAK      |                |                |              |      |
| 1380.7118           | 1380.705      | -0.0068       | -5            | 16                  | 28              | GNPTVEVDLHTAK      |                |                |              |      |
| 1804.9438           | 1804.9406     | -0.0032       | -2            | 33                  | 50              | AAVPSGASTGIYEALELR | 23             | 56.682         |              |      |
| 1804.9438           | 1804.9406     | -0.0032       | -2            | 33                  | 50              | AAVPSGASTGIYEALELR | 17             | 0              |              |      |
| 1804.9438           | 1804.9406     | -0.0032       | -2            | 33                  | 50              | AAVPSGASTGIYEALELR |                |                |              |      |

| Protein Name        | Accession No. | Peptide Count | Protein Score | Protein Score C.I.% | Total Ion Score | Total Ion C.I. % | Best Ion Score | Best Ion C.I.% | % Coverage   |      |
|---------------------|---------------|---------------|---------------|---------------------|-----------------|------------------|----------------|----------------|--------------|------|
| Guanine deaminase   | trm Q9JKB7    | 9             | 360           | 100                 | 293             |                  | 100            | 115            | 100          | 20.0 |
| Peptide Information |               |               |               |                     |                 |                  |                |                |              |      |
| Calc. Mass          | Obsrv. Mass   | ± da          | ± ppm         | Start Seq.          | End Seq.        | Sequence         | Ion Score      | C. I. %        | Modification |      |
| 885.4352            | 885.437       | 0.0018        | 2             | 106                 | 112             | YTFPTEK          |                |                |              |      |
| 909.588             | 909.5894      | 0.0014        | 2             | 206                 | 213             | VKPIVTPR         |                |                |              |      |
| 909.588             | 909.5894      | 0.0014        | 2             | 206                 | 213             | VKPIVTPR         | 28             | 85.262         |              |      |
| 992.5046            | 992.5482      | 0.0436        | 44            | 385                 | 393             | EIGNFEVVK        |                |                |              |      |
| 998.4941            | 998.5018      | 0.0077        | 8             | 428                 | 435             | FLYLGDDR         |                |                |              |      |
| 998.4941            | 998.5018      | 0.0077        | 8             | 428                 | 435             | FLYLGDDR         | 45             | 99.759         |              |      |
| 1107.568            | 1107.5649     | -0.0031       | -3            | 436                 | 445             | NIEEVYGGK        |                |                |              |      |
| 1173.6262           | 1173.6289     | 0.0027        | 2             | 394                 | 403             | DFDALLINPR       |                |                |              |      |
| 1173.6262           | 1173.6289     | 0.0027        | 2             | 394                 | 403             | DFDALLINPR       | 83             | 100            |              |      |
| 1173.6262           | 1173.6289     | 0.0027        | 2             | 394                 | 403             | DFDALLINPR       |                |                |              |      |
| 1371.759            | 1371.7617     | 0.0027        | 2             | 371                 | 384             | LATLGGSQALGLDR   |                |                |              |      |
| 1371.759            | 1371.7617     | 0.0027        | 2             | 371                 | 384             | LATLGGSQALGLDR   |                |                |              |      |
| 1371.759            | 1371.7617     | 0.0027        | 2             | 371                 | 384             | LATLGGSQALGLDR   | 22             | 50.404         |              |      |
| 1436.7267           | 1436.7228     | -0.0039       | -3            | 42                  | 53              | IVFLEESSQKEK     |                |                |              |      |
| 1544.7227           | 1544.7273     | 0.0046        | 3             | 114                 | 126             | FQSTDVAEEVYTR    | 18             | 0              |              |      |
| 1544.7227           | 1544.7273     | 0.0046        | 3             | 114                 | 126             | FQSTDVAEEVYTR    |                |                |              |      |
| 1544.7227           | 1544.7273     | 0.0046        | 3             | 114                 | 126             | FQSTDVAEEVYTR    | 115            | 100            |              |      |

| Protein Name               | Accession No. | Peptide Count | Protein Score | Protein Score C.I.% | Total Ion Score | Total Ion C.I. % | Best Ion Score | Best Ion C.I.% | % Coverage   |      |
|----------------------------|---------------|---------------|---------------|---------------------|-----------------|------------------|----------------|----------------|--------------|------|
| COP9 signalosome subunit 4 | gij51948518   | 5             | 180           | 100                 | 150             |                  | 100            | 63             | 99.996       | 13.8 |
| Peptide Information        |               |               |               |                     |                 |                  |                |                |              |      |
| Calc. Mass                 | Obsrv. Mass   | ± da          | ± ppm         | Start Seq.          | End Seq.        | Sequence         | Ion Score      | C. I. %        | Modification |      |
| 834.4468                   | 834.4628      | 0.016         | 19            | 201                 | 207             | FIEAAQR          | 42             | 99.535         |              |      |
| 834.4468                   | 834.4628      | 0.016         | 19            | 201                 | 207             | FIEAAQR          | 38             | 98.73          |              |      |
| 834.4468                   | 834.4628      | 0.016         | 19            | 201                 | 207             | FIEAAQR          |                |                |              |      |
| 970.4952                   | 970.5009      | 0.0057        | 6             | 215                 | 222             | TIVHESER         | 39             | 99.028         |              |      |
| 970.4952                   | 970.5009      | 0.0057        | 6             | 215                 | 222             | TIVHESER         |                |                |              |      |

|           |           |        |    |     |     |                   |    |        |
|-----------|-----------|--------|----|-----|-----|-------------------|----|--------|
| 970.4952  | 970.5009  | 0.0057 | 6  | 215 | 222 | TIVHESER          | 18 | 0      |
| 1206.5961 | 1206.6086 | 0.0125 | 10 | 291 | 302 | ATTADGSSILDR      |    |        |
| 1206.5961 | 1206.6086 | 0.0125 | 10 | 291 | 302 | ATTADGSSILDR      | 7  | 0      |
| 1377.7372 | 1377.7406 | 0.0034 | 2  | 96  | 107 | VISFEEQVASIR      | 28 | 88.149 |
| 1377.7372 | 1377.7406 | 0.0034 | 2  | 96  | 107 | VISFEEQVASIR      |    |        |
| 1377.7372 | 1377.7406 | 0.0034 | 2  | 96  | 107 | VISFEEQVASIR      | 63 | 99.996 |
| 2023.9607 | 2023.9629 | 0.0022 | 1  | 154 | 170 | LYLEDDDPVQAEAYINR |    |        |
| 2023.9607 | 2023.9629 | 0.0022 | 1  | 154 | 170 | LYLEDDDPVQAEAYINR |    |        |

| Protein Name                                | Accession No. | Peptide Count | Protein Score | Protein Score C.I.% | Total Ion Score | Total Ion C.I. % | Best Ion Score | Best Ion C.I.% | % Coverage |
|---------------------------------------------|---------------|---------------|---------------|---------------------|-----------------|------------------|----------------|----------------|------------|
| Guanine nucleotide binding protein, alpha o | cra RCP51914  | 6             | 137           | 100                 | 84              | 100              | 48             | 99.886         | 17.8       |

| Peptide Information | Calc. Mass | Obsrv. Mass | ± da   | ± ppm | Start Seq. | End Seq. | Sequence        | Ion Score | C. I. % | Modification |
|---------------------|------------|-------------|--------|-------|------------|----------|-----------------|-----------|---------|--------------|
|                     | 836.4512   | 836.4588    | 0.0076 | 9     | 228        | 234      | KDLFGEK         |           |         |              |
|                     | 891.4682   | 891.4689    | 0.0007 | 1     | 155        | 162      | LFDVGGQR        |           |         |              |
|                     | 891.4682   | 891.4689    | 0.0007 | 1     | 155        | 162      | LFDVGGQR        | 26        | 82.984  |              |
|                     | 891.4682   | 891.4689    | 0.0007 | 1     | 155        | 162      | LFDVGGQR        | 11        | 0       |              |
|                     | 1044.4996  | 1044.5084   | 0.0088 | 8     | 111        | 118      | YYLDSLDR        | 6         | 0       |              |
|                     | 1044.4996  | 1044.5084   | 0.0088 | 8     | 111        | 118      | YYLDSLDR        | 10        | 0       |              |
|                     | 1298.5933  | 1298.6355   | 0.0422 | 32    | 43         | 54       | AMDTLGVEYGDK    |           |         |              |
|                     | 1298.5933  | 1298.6355   | 0.0422 | 32    | 43         | 54       | AMDTLGVEYGDK    |           |         |              |
|                     | 1298.5933  | 1298.6355   | 0.0422 | 32    | 43         | 54       | AMDTLGVEYGDK    |           |         |              |
|                     | 1445.6907  | 1445.6952   | 0.0045 | 3     | 11         | 23       | IHEDGFSGEDVK    |           |         |              |
|                     | 1689.8442  | 1689.8507   | 0.0065 | 4     | 119        | 133      | IGAADYQPTEQDILR |           |         |              |
|                     | 1689.8442  | 1689.8507   | 0.0065 | 4     | 119        | 133      | IGAADYQPTEQDILR | 7         | 0       |              |
|                     | 1689.8442  | 1689.8507   | 0.0065 | 4     | 119        | 133      | IGAADYQPTEQDILR | 48        | 99.886  |              |

| Protein Name           | Accession No. | Peptide Count | Protein Score | Protein Score C.I.% | Total Ion Score | Total Ion C.I. % | Best Ion Score | Best Ion C.I.% | % Coverage |
|------------------------|---------------|---------------|---------------|---------------------|-----------------|------------------|----------------|----------------|------------|
| Malate dehydrogenase 1 | gb AAH59124.1 | 6             | 241           | 100                 | 196             | 100              | 79             | 100            | 16.5       |

| Peptide Information | Calc. Mass | Obsrv. Mass | ± da    | ± ppm | Start Seq. | End Seq. | Sequence     | Ion Score | C. I. % | Modification |
|---------------------|------------|-------------|---------|-------|------------|----------|--------------|-----------|---------|--------------|
|                     | 811.442    | 811.4605    | 0.0185  | 23    | 249        | 255      | AISDHIR      | 57        | 99.982  |              |
|                     | 811.442    | 811.4605    | 0.0185  | 23    | 249        | 255      | AISDHIR      | 52        | 99.949  |              |
|                     | 811.442    | 811.4605    | 0.0185  | 23    | 249        | 255      | AISDHIR      |           |         |              |
|                     | 858.5406   | 858.5117    | -0.0289 | -34   | 163        | 170      | AKSQIALK     |           |         |              |
|                     | 917.4938   | 917.4992    | 0.0054  | 6     | 171        | 179      | LGVTTADDVK   |           |         |              |
|                     | 1007.5407  | 1007.547    | 0.0063  | 6     | 206        | 214      | EVGVYEALK    |           |         |              |
|                     | 1178.6165  | 1178.6277   | 0.0112  | 10    | 221        | 230      | GEFITTQQQR   | 79        | 100     |              |
|                     | 1178.6165  | 1178.6277   | 0.0112  | 10    | 221        | 230      | GEFITTQQQR   |           |         |              |
|                     | 1178.6165  | 1178.6277   | 0.0112  | 10    | 221        | 230      | GEFITTQQQR   | 74        | 100     |              |
|                     | 1393.7111  | 1393.7247   | 0.0136  | 10    | 299        | 310      | FVEGLPINDFSR |           |         |              |
|                     | 1393.7111  | 1393.7247   | 0.0136  | 10    | 299        | 310      | FVEGLPINDFSR | 60        | 99.992  |              |

| Protein Name                                | Accession No. | Peptide Count | Protein Score | Protein Score C.I.% | Total Ion Score | Total Ion C.I. % | Best Ion Score | Best Ion C.I.% | % Coverage |
|---------------------------------------------|---------------|---------------|---------------|---------------------|-----------------|------------------|----------------|----------------|------------|
| Serine/threonine specific protein phosphata | trm Q9WUV7    | 8             | 79            | 99.973              | 20              | 76.74            | 20             | 76.74          | 13.6       |

| Peptide Information | Calc. Mass | Obsrv. Mass | ± da    | ± ppm | Start Seq. | End Seq. | Sequence     | Ion Score | C. I. % | Modification |
|---------------------|------------|-------------|---------|-------|------------|----------|--------------|-----------|---------|--------------|
|                     | 1007.5421  | 1007.5262   | -0.0159 | -16   | 20         | 28       | AVPFPSSH     | 20        | 76.74   |              |
|                     | 1007.5421  | 1007.5262   | -0.0159 | -16   | 20         | 28       | AVPFPSSH     |           |         |              |
|                     | 1072.6361  | 1072.6195   | -0.0166 | -15   | 64         | 73       | IITEGASILR   |           |         |              |
|                     | 1176.5643  | 1176.551    | -0.0133 | -11   | 33         | 42       | EVFDNDGKPR   |           |         |              |
|                     | 1185.5939  | 1185.5947   | 0.0008  | 1     | 155        | 163      | HLTEYFTFK    |           |         |              |
|                     | 1247.6378  | 1247.6259   | -0.0119 | -10   | 101        | 112      | LFEVGGSPANTR |           |         |              |
|                     | 1247.6378  | 1247.6259   | -0.0119 | -10   | 101        | 112      | LFEVGGSPANTR |           |         |              |
|                     | 1260.6259  | 1260.6167   | -0.0092 | -7    | 113        | 122      | YLFLGDYVDR   |           |         |              |

|           |           |         |     |     |     |                          |
|-----------|-----------|---------|-----|-----|-----|--------------------------|
| 1369.6608 | 1369.6516 | -0.0092 | -7  | 244 | 254 | TQEHFTHNTVR              |
| 2441.3433 | 2441.2908 | -0.0525 | -22 | 425 | 449 | GLTPTGMPLPSGVLGGKQLQSAIK |

| Protein Name                           | Accession No. | Peptide Count | Protein Score | Protein Score C.I.% | Total Ion Score | Total Ion C.I. %  | Best Ion Score | Best Ion C.I.% | % Coverage   |
|----------------------------------------|---------------|---------------|---------------|---------------------|-----------------|-------------------|----------------|----------------|--------------|
| Glyoxylase domain-containing protein 4 | spt Q5IOD1    | 5             | 112           | 100                 | 81              | 100               | 58             | 99.99          | 17.8         |
| Peptide Information                    |               |               |               |                     |                 |                   |                |                |              |
| Calc. Mass                             | Obsrv. Mass   | ± da          | ± ppm         | Start Seq.          | End Seq.        | Sequence          | Ion Score      | C. I. %        | Modification |
| 841.4202                               | 841.4359      | 0.0157        | 19            | 125                 | 130             | FYLQDR            |                |                |              |
| 861.498                                | 861.501       | 0.003         | 3             | 6                   | 12              | ALHFVFK           |                |                |              |
| 861.498                                | 861.501       | 0.003         | 3             | 6                   | 12              | ALHFVFK           | 23             | 75.328         |              |
| 1081.5577                              | 1081.5635     | 0.0058        | 5             | 17                  | 24              | FQTVHFFR          |                |                |              |
| 1081.5577                              | 1081.5635     | 0.0058        | 5             | 17                  | 24              | FQTVHFFR          | 58             | 99.991         |              |
| 1553.7482                              | 1553.7476     | -0.0006       | 0             | 110                 | 124             | VAEGVFETEAPGGYK   |                |                |              |
| 1784.964                               | 1784.9264     | -0.0376       | -21           | 221                 | 237             | ESQSILTPLVSLDTPGK |                |                |              |

| Protein Name                                | Accession No.  | Peptide Count | Protein Score | Protein Score C.I.% | Total Ion Score | Total Ion C.I. % | Best Ion Score | Best Ion C.I.% | % Coverage   |
|---------------------------------------------|----------------|---------------|---------------|---------------------|-----------------|------------------|----------------|----------------|--------------|
| Tumor protein, translationally-controlled 1 | rf NP_446319.1 | 2             | 115           | 100                 | 92              | 100              | 46             | 99.88          | 5.8          |
| Peptide Information                         |                |               |               |                     |                 |                  |                |                |              |
| Calc. Mass                                  | Obsrv. Mass    | ± da          | ± ppm         | Start Seq.          | End Seq.        | Sequence         | Ion Score      | C. I. %        | Modification |
| 1028.5371                                   | 1028.4962      | -0.0409       | -40           | 103                 | 110             | LEEQKPER         | 46             | 99.883         |              |
| 1028.5371                                   | 1028.4962      | -0.0409       | -40           | 103                 | 110             | LEEQKPER         |                |                |              |
| 1213.6534                                   | 1213.614       | -0.0394       | -32           | 101                 | 110             | GKLEEQKPER       | 46             | 99.86          |              |
| 1213.6534                                   | 1213.614       | -0.0394       | -32           | 101                 | 110             | GKLEEQKPER       |                |                |              |

| Protein Name        | Accession No. | Peptide Count | Protein Score | Protein Score C.I.% | Total Ion Score | Total Ion C.I. % | Best Ion Score | Best Ion C.I.% | % Coverage   |
|---------------------|---------------|---------------|---------------|---------------------|-----------------|------------------|----------------|----------------|--------------|
| Peroxiredoxin 2     | gij 34849738  | 5             | 295           | 100                 | 226             | 100              | 79             | 100            | 27.3         |
| Peptide Information |               |               |               |                     |                 |                  |                |                |              |
| Calc. Mass          | Obsrv. Mass   | ± da          | ± ppm         | Start Seq.          | End Seq.        | Sequence         | Ion Score      | C. I. %        | Modification |
| 876.5189            | 876.5029      | -0.016        | -18           | 128                 | 135             | GLFIIDAK         | 29             | 89.035         |              |
| 876.5189            | 876.5029      | -0.016        | -18           | 128                 | 135             | GLFIIDAK         |                |                |              |
| 937.4373            | 937.4267      | -0.0106       | -11           | 120                 | 127             | NDEGIAYR         | 59             | 99.989         |              |
| 937.4373            | 937.4267      | -0.0106       | -11           | 120                 | 127             | NDEGIAYR         |                |                |              |
| 937.4373            | 937.4267      | -0.0106       | -11           | 120                 | 127             | NDEGIAYR         | 45             | 99.744         |              |
| 1108.5997           | 1108.5862     | -0.0135       | -12           | 110                 | 119             | SLSQNYGVLK       | 60             | 99.992         |              |
| 1108.5997           | 1108.5862     | -0.0135       | -12           | 110                 | 119             | SLSQNYGVLK       |                |                |              |
| 1211.6742           | 1211.6682     | -0.006        | -5            | 140                 | 150             | QITVNDLPVGR      |                |                |              |
| 1211.6742           | 1211.6682     | -0.006        | -5            | 140                 | 150             | QITVNDLPVGR      | 79             | 100            |              |
| 1211.6742           | 1211.6682     | -0.006        | -5            | 140                 | 150             | QITVNDLPVGR      | 39             | 98.995         |              |
| 1706.9686           | 1706.9591     | -0.0095       | -6            | 93                  | 109             | EGGLGPLNIPLADVTK |                |                |              |
| 1706.9686           | 1706.9591     | -0.0095       | -6            | 93                  | 109             | EGGLGPLNIPLADVTK |                |                |              |

| Protein Name                  | Accession No. | Peptide Count | Protein Score | Protein Score C.I.% | Total Ion Score | Total Ion C.I. % | Best Ion Score | Best Ion C.I.% | % Coverage   |
|-------------------------------|---------------|---------------|---------------|---------------------|-----------------|------------------|----------------|----------------|--------------|
| Ferritin, heavy polypeptide 1 | gij 6978859   | 5             | 146           | 100                 | 99              | 100              | 42             | 99.805         | 28.0         |
| Peptide Information           |               |               |               |                     |                 |                  |                |                |              |
| Calc. Mass                    | Obsrv. Mass   | ± da          | ± ppm         | Start Seq.          | End Seq.        | Sequence         | Ion Score      | C. I. %        | Modification |
| 876.5189                      | 876.5171      | -0.0018       | -2            | 81                  | 87              | IFLQDIK          |                |                |              |
| 1153.5959                     | 1153.6022     | 0.0063        | 5             | 148                 | 157             | ELGDHVTNLR       | 42             | 99.805         |              |
| 1153.5959                     | 1153.6022     | 0.0063        | 5             | 148                 | 157             | ELGDHVTNLR       |                |                |              |
| 1267.7004                     | 1267.6975     | -0.0029       | -2            | 110                 | 120             | SVNQSLLELHK      |                |                |              |
| 1345.6284                     | 1345.6355     | 0.0071        | 5             | 55                  | 64              | YFLHQSHEER       | 34             | 98.823         |              |
| 1345.6284                     | 1345.6355     | 0.0071        | 5             | 55                  | 64              | YFLHQSHEER       |                |                |              |
| 1545.7041                     | 1545.7073     | 0.0032        | 2             | 11                  | 23              | QNYHQDSEAAINR    | 23             | 84.448         |              |
| 1545.7041                     | 1545.7073     | 0.0032        | 2             | 11                  | 23              | QNYHQDSEAAINR    |                |                |              |

| Protein Name               | Accession No.  | Peptide Count | Protein Score | Protein Score C.I.% | Total Ion Score | Total Ion C.I. % | Best Ion Score | Best Ion C.I.% | % Coverage |      |
|----------------------------|----------------|---------------|---------------|---------------------|-----------------|------------------|----------------|----------------|------------|------|
| Proteasome subunit R-DELTA | dbj BAA01586.1 | 6             | 125           | 100                 | 67              |                  | 99.999         | 54             | 99.978     | 26.1 |

| Peptide Information |             |         |       |            |          |                       |           |         |              |  |
|---------------------|-------------|---------|-------|------------|----------|-----------------------|-----------|---------|--------------|--|
| Calc. Mass          | Obsrv. Mass | ± da    | ± ppm | Start Seq. | End Seq. | Sequence              | Ion Score | C. I. % | Modification |  |
| 847.4268            | 847.434     | 0.0072  | 8     | 164        | 172      | DGSSGGVIR             |           |         |              |  |
| 847.4268            | 847.434     | 0.0072  | 8     | 164        | 172      | DGSSGGVIR             |           |         |              |  |
| 1083.543            | 1083.5366   | -0.0064 | -6    | 17         | 26       | TTTGSYIANR            |           |         |              |  |
| 1083.543            | 1083.5366   | -0.0064 | -6    | 17         | 26       | TTTGSYIANR            |           |         |              |  |
| 1110.6517           | 1110.6393   | -0.0124 | -11   | 184        | 193      | QVLLGDQIPK            |           |         |              |  |
| 1171.6429           | 1171.6461   | 0.0032  | 3     | 173        | 183      | LAAIQQSGVER           |           |         |              |  |
| 1171.6429           | 1171.6461   | 0.0032  | 3     | 173        | 183      | LAAIQQSGVER           | 45        | 99.806  |              |  |
| 1171.6429           | 1171.6461   | 0.0032  | 3     | 173        | 183      | LAAIQQSGVER           | 54        | 99.978  |              |  |
| 1490.7598           | 1490.7704   | 0.0106  | 7     | 2          | 16       | AVQFDGGVVLGADSR       |           |         |              |  |
| 2362.0986           | 2362.0947   | -0.0039 | -2    | 120        | 141      | QSFAIGGSGSSYIYGVDATYR |           |         |              |  |
| 2362.0986           | 2362.0947   | -0.0039 | -2    | 120        | 141      | QSFAIGGSGSSYIYGVDATYR | 13        | 0       |              |  |
| 2362.0986           | 2362.0947   | -0.0039 | -2    | 120        | 141      | QSFAIGGSGSSYIYGVDATYR | 13        | 0       |              |  |

| Protein Name                | Accession No.  | Peptide Count | Protein Score | Protein Score C.I.% | Total Ion Score | Total Ion C.I. % | Best Ion Score | Best Ion C.I.% | % Coverage |      |
|-----------------------------|----------------|---------------|---------------|---------------------|-----------------|------------------|----------------|----------------|------------|------|
| Calcium binding protein P22 | rf NP_077053.1 | 5             | 97            | 100                 | 35              |                  | 98.153         | 35             | 98.153     | 33.8 |

| Peptide Information |             |         |       |            |          |                  |           |         |              |  |
|---------------------|-------------|---------|-------|------------|----------|------------------|-----------|---------|--------------|--|
| Calc. Mass          | Obsrv. Mass | ± da    | ± ppm | Start Seq. | End Seq. | Sequence         | Ion Score | C. I. % | Modification |  |
| 1262.6124           | 1262.5518   | -0.0606 | -48   | 20         | 30       | ETGFSSSQITR      |           |         |              |  |
| 1262.6124           | 1262.5518   | -0.0606 | -48   | 20         | 30       | ETGFSSSQITR      |           |         |              |  |
| 1262.6124           | 1262.5518   | -0.0606 | -48   | 20         | 30       | ETGFSSSQITR      |           |         |              |  |
| 1307.7318           | 1307.6749   | -0.0569 | -44   | 54         | 65       | IPELAINPLGDR     |           |         |              |  |
| 1307.7318           | 1307.6749   | -0.0569 | -44   | 54         | 65       | IPELAINPLGDR     | 35        | 98.153  |              |  |
| 1412.7128           | 1412.6581   | -0.0547 | -39   | 99         | 111      | SKDVNGPEPLNSR    |           |         |              |  |
| 1524.7653           | 1524.7168   | -0.0485 | -32   | 35         | 48       | FTSLDKGNGTSLR    |           |         |              |  |
| 1885.9078           | 1885.9009   | -0.0069 | -4    | 66         | 81       | IINAFSEGEDQVNFRR |           |         |              |  |

| Protein Name | Accession No. | Peptide Count | Protein Score | Protein Score C.I.% | Total Ion Score | Total Ion C.I. % | Best Ion Score | Best Ion C.I.% | % Coverage |      |
|--------------|---------------|---------------|---------------|---------------------|-----------------|------------------|----------------|----------------|------------|------|
| Gamma-actin  | spt P4501887  | 5             | 221           | 100                 | 181             |                  | 100            | 65             | 100        | 18.0 |

| Peptide Information |             |         |       |            |          |                    |           |         |              |  |
|---------------------|-------------|---------|-------|------------|----------|--------------------|-----------|---------|--------------|--|
| Calc. Mass          | Obsrv. Mass | ± da    | ± ppm | Start Seq. | End Seq. | Sequence           | Ion Score | C. I. % | Modification |  |
| 976.4482            | 976.4561    | 0.0079  | 8     | 19         | 28       | AGFAGDDAPR         | 49        | 99.907  |              |  |
| 976.4482            | 976.4561    | 0.0079  | 8     | 19         | 28       | AGFAGDDAPR         |           |         |              |  |
| 1132.527            | 1132.5363   | 0.0093  | 8     | 197        | 206      | GYSFTTTAER         |           |         |              |  |
| 1132.527            | 1132.5363   | 0.0093  | 8     | 197        | 206      | GYSFTTTAER         | 6         | 0       |              |  |
| 1132.527            | 1132.5363   | 0.0093  | 8     | 197        | 206      | GYSFTTTAER         |           |         |              |  |
| 1516.7026           | 1516.7031   | 0.0005  | 0     | 360        | 372      | QEYDESGPSIVHR      | 61        | 99.995  |              |  |
| 1516.7026           | 1516.7031   | 0.0005  | 0     | 360        | 372      | QEYDESGPSIVHR      | 27        | 87.25   |              |  |
| 1516.7026           | 1516.7031   | 0.0005  | 0     | 360        | 372      | QEYDESGPSIVHR      |           |         |              |  |
| 1790.8918           | 1790.8929   | 0.0011  | 1     | 239        | 254      | SYELPDGQVITIGNER   | 17        | 0       |              |  |
| 1790.8918           | 1790.8929   | 0.0011  | 1     | 239        | 254      | SYELPDGQVITIGNER   |           |         |              |  |
| 1790.8918           | 1790.8929   | 0.0011  | 1     | 239        | 254      | SYELPDGQVITIGNER   | 65        | 99.998  |              |  |
| 1954.0643           | 1954.0625   | -0.0018 | -1    | 96         | 113      | VAPEEHPVLLTEAPLNPK |           |         |              |  |

| Protein Name         | Accession No. | Peptide Count | Protein Score | Protein Score C.I.% | Total Ion Score | Total Ion C.I. % | Best Ion Score | Best Ion C.I.% | % Coverage |      |
|----------------------|---------------|---------------|---------------|---------------------|-----------------|------------------|----------------|----------------|------------|------|
| Heat shock protein 4 | gij 24025637  | 8             | 98            | 100                 | 47              |                  | 99.887         | 21             | 54.744     | 12.3 |

| Peptide Information |             |       |       |            |          |           |           |         |              |  |
|---------------------|-------------|-------|-------|------------|----------|-----------|-----------|---------|--------------|--|
| Calc. Mass          | Obsrv. Mass | ± da  | ± ppm | Start Seq. | End Seq. | Sequence  | Ion Score | C. I. % | Modification |  |
| 1149.5535           | 1149.5765   | 0.023 | 20    | 689        | 697      | FQESEERPK |           |         |              |  |
| 1149.5535           | 1149.5765   | 0.023 | 20    | 689        | 697      | FQESEERPK | 1         | 0       |              |  |
| 1149.5535           | 1149.5765   | 0.023 | 20    | 689        | 697      | FQESEERPK |           |         |              |  |



|           |           |         |    |     |     |                 |    |        |
|-----------|-----------|---------|----|-----|-----|-----------------|----|--------|
| 1295.6954 | 1295.707  | 0.0116  | 9  | 186 | 196 | QDLPALEEKPR     | 21 | 54.744 |
| 1295.6954 | 1295.707  | 0.0116  | 9  | 186 | 196 | QDLPALEEKPR     |    |        |
| 1321.7111 | 1321.7242 | 0.0131  | 10 | 222 | 234 | VLATAFDITLLGGR  |    |        |
| 1321.7111 | 1321.7242 | 0.0131  | 10 | 222 | 234 | VLATAFDITLLGGR  | 9  | 0      |
| 1321.7111 | 1321.7242 | 0.0131  | 10 | 222 | 234 | VLATAFDITLLGGR  | 10 | 0      |
| 1492.7642 | 1492.7711 | 0.0069  | 5  | 333 | 346 | EDIYAVEIVGGATR  |    |        |
| 1495.7023 | 1495.7151 | 0.0128  | 9  | 20  | 33  | AGGIETIANEYSDR  | 16 | 0      |
| 1495.7023 | 1495.7151 | 0.0128  | 9  | 20  | 33  | AGGIETIANEYSDR  |    |        |
| 1495.7023 | 1495.7151 | 0.0128  | 9  | 20  | 33  | AGGIETIANEYSDR  | 11 | 0      |
| 1519.7599 | 1519.7638 | 0.0039  | 3  | 361 | 374 | ELSTTLNADEAVTR  |    |        |
| 1584.7653 | 1584.7693 | 0.004   | 3  | 639 | 651 | FVSEDDRRNFTLK   |    |        |
| 1584.7653 | 1584.7693 | 0.004   | 3  | 639 | 651 | FVSEDDRRNFTLK   |    |        |
| 1735.9265 | 1735.9169 | -0.0096 | -6 | 391 | 405 | EFISITDVVPYISLR |    |        |

| Protein Name         | Accession No. | Peptide Count | Protein Score | Protein Score C.I.% | Total Ion Score | Total Ion C.I. % | Best Ion Score | Best Ion C.I.% | % Coverage |      |
|----------------------|---------------|---------------|---------------|---------------------|-----------------|------------------|----------------|----------------|------------|------|
| Heat shock protein 4 | gil24025637   | 8             | 129           | 100                 | 74              |                  | 100            | 36             | 98.364     | 12.3 |

| Peptide Information | Calc. Mass | Obsrv. Mass | ± da    | ± ppm | Start Seq. | End Seq. | Sequence        | Ion Score | C. I. % | Modification |
|---------------------|------------|-------------|---------|-------|------------|----------|-----------------|-----------|---------|--------------|
|                     | 1149.5535  | 1149.5645   | 0.011   | 10    | 689        | 697      | FQESEERPK       |           |         |              |
|                     | 1149.5535  | 1149.5645   | 0.011   | 10    | 689        | 697      | FQESEERPK       | 11        | 0       |              |
|                     | 1149.5535  | 1149.5645   | 0.011   | 10    | 689        | 697      | FQESEERPK       | 2         | 0       |              |
|                     | 1295.6954  | 1295.6942   | -0.0012 | -1    | 186        | 196      | QDLPALEEKPR     |           |         |              |
|                     | 1295.6954  | 1295.6942   | -0.0012 | -1    | 186        | 196      | QDLPALEEKPR     | 36        | 98.364  |              |
|                     | 1321.7111  | 1321.7123   | 0.0012  | 1     | 222        | 234      | VLATAFDITLLGGR  | 11        | 0       |              |
|                     | 1321.7111  | 1321.7123   | 0.0012  | 1     | 222        | 234      | VLATAFDITLLGGR  |           |         |              |
|                     | 1321.7111  | 1321.7123   | 0.0012  | 1     | 222        | 234      | VLATAFDITLLGGR  | 10        | 0       |              |
|                     | 1492.7642  | 1492.7583   | -0.0059 | -4    | 333        | 346      | EDIYAVEIVGGATR  |           |         |              |
|                     | 1492.7642  | 1492.7583   | -0.0059 | -4    | 333        | 346      | EDIYAVEIVGGATR  |           |         |              |
|                     | 1495.7023  | 1495.702    | -0.0003 | 0     | 20         | 33       | AGGIETIANEYSDR  | 14        | 0       |              |
|                     | 1495.7023  | 1495.702    | -0.0003 | 0     | 20         | 33       | AGGIETIANEYSDR  | 15        | 0       |              |
|                     | 1495.7023  | 1495.702    | -0.0003 | 0     | 20         | 33       | AGGIETIANEYSDR  |           |         |              |
|                     | 1519.7599  | 1519.7552   | -0.0047 | -3    | 361        | 374      | ELSTTLNADEAVTR  |           |         |              |
|                     | 1584.7653  | 1584.7573   | -0.008  | -5    | 639        | 651      | FVSEDDRRNFTLK   |           |         |              |
|                     | 1735.9265  | 1735.9124   | -0.0141 | -8    | 391        | 405      | EFISITDVVPYISLR |           |         |              |

| Protein Name | Accession No. | Peptide Count | Protein Score | Protein Score C.I.% | Total Ion Score | Total Ion C.I. % | Best Ion Score | Best Ion C.I.% | % Coverage |      |
|--------------|---------------|---------------|---------------|---------------------|-----------------|------------------|----------------|----------------|------------|------|
| Dynamin 1    | gil18093102   | 13            | 149           | 100                 | 54              |                  | 99.967         | 25             | 75.48      | 15.4 |

| Peptide Information | Calc. Mass | Obsrv. Mass | ± da    | ± ppm | Start Seq. | End Seq. | Sequence        | Ion Score | C. I. % | Modification |
|---------------------|------------|-------------|---------|-------|------------|----------|-----------------|-----------|---------|--------------|
|                     | 839.5097   | 839.5444    | 0.0347  | 41    | 459        | 465      | IVTTHIR         |           |         |              |
|                     | 839.5097   | 839.5444    | 0.0347  | 41    | 459        | 465      | IVTTHIR         |           |         |              |
|                     | 877.489    | 877.5189    | 0.0299  | 34    | 230        | 237      | GYIGVVNR        |           |         |              |
|                     | 1065.6415  | 1065.6301   | -0.0114 | -11   | 114        | 123      | GISPVPINLR      |           |         |              |
|                     | 1065.6415  | 1065.6301   | -0.0114 | -11   | 114        | 123      | GISPVPINLR      |           |         |              |
|                     | 1087.528   | 1087.5223   | -0.0057 | -5    | 316        | 324      | NFRPDDPAR       | 17        | 0       |              |
|                     | 1087.528   | 1087.5223   | -0.0057 | -5    | 316        | 324      | NFRPDDPAR       |           |         |              |
|                     | 1107.5792  | 1107.5605   | -0.0187 | -17   | 45         | 54       | SSVLENFVGR      |           |         |              |
|                     | 1213.6284  | 1213.6031   | -0.0253 | -21   | 774        | 784      | SPTSSPTPQRR     |           |         |              |
|                     | 1213.6284  | 1213.6031   | -0.0253 | -21   | 773        | 783      | RSPTSSPTPQR     | 12        | 0       |              |
|                     | 1281.6738  | 1281.6373   | -0.0365 | -28   | 257        | 266      | KFFLSHPSYR      |           |         |              |
|                     | 1335.7491  | 1335.7      | -0.0491 | -37   | 280        | 290      | VLNQQLTNHIR     |           |         |              |
|                     | 1335.7491  | 1335.7      | -0.0491 | -37   | 280        | 290      | VLNQQLTNHIR     |           |         |              |
|                     | 1335.7491  | 1335.7      | -0.0491 | -37   | 280        | 290      | VLNQQLTNHIR     |           |         |              |
|                     | 1344.7118  | 1344.661    | -0.0508 | -38   | 511        | 522      | TSGNQDEILVIR    |           |         |              |
|                     | 1375.7117  | 1375.6608   | -0.0509 | -37   | 584        | 594      | HIFALFNTEQR     |           |         |              |
|                     | 1709.8857  | 1709.824    | -0.0617 | -36   | 143        | 157      | VPVGDQPPDIEFQIR | 25        | 75.48   |              |

|           |           |         |     |     |     |                    |
|-----------|-----------|---------|-----|-----|-----|--------------------|
| 1709.8857 | 1709.824  | -0.0617 | -36 | 143 | 157 | VPVGDQPPDIEFQIR    |
| 1867.8668 | 1867.8132 | -0.0536 | -29 | 344 | 361 | IEGSGDQIDTYELSGGAR |

| Protein Name        | Accession No. | Peptide Count | Protein Score | Protein Score C.I.% | Total Ion Score | Total Ion C.I. %     | Best Ion Score | Best Ion C.I.% | % Coverage   |      |
|---------------------|---------------|---------------|---------------|---------------------|-----------------|----------------------|----------------|----------------|--------------|------|
| Dynamidin 1         | gi 18093102   | 13            | 143           | 100                 | 57              |                      | 99.99          | 26             | 85.265       | 17.1 |
| Peptide Information |               |               |               |                     |                 |                      |                |                |              |      |
| Calc. Mass          | Obsrv. Mass   | ± da          | ± ppm         | Start Seq.          | End Seq.        | Sequence             | Ion Score      | C. I. %        | Modification |      |
| 804.4362            | 804.4749      | 0.0387        | 48            | 446                 | 451             | LQQYPR               | 16             | 0              |              |      |
| 804.4362            | 804.4749      | 0.0387        | 48            | 446                 | 451             | LQQYPR               |                |                |              |      |
| 839.5097            | 839.5434      | 0.0337        | 40            | 459                 | 465             | IVTTHIR              |                |                |              |      |
| 877.489             | 877.5247      | 0.0357        | 41            | 230                 | 237             | GYIGVVNR             |                |                |              |      |
| 1065.6415           | 1065.6625     | 0.021         | 20            | 114                 | 123             | GISPVPINLR           |                |                |              |      |
| 1065.6415           | 1065.6625     | 0.021         | 20            | 114                 | 123             | GISPVPINLR           |                |                |              |      |
| 1087.528            | 1087.5548     | 0.0268        | 25            | 316                 | 324             | NFRPDDPAR            |                |                |              |      |
| 1107.5792           | 1107.5878     | 0.0086        | 8             | 45                  | 54              | SSVLENFVGR           |                |                |              |      |
| 1153.5789           | 1153.598      | 0.0191        | 17            | 258                 | 266             | FFLSHPSYR            |                |                |              |      |
| 1213.6284           | 1213.6503     | 0.0219        | 18            | 774                 | 784             | SPTSSPTPQRR          |                |                |              |      |
| 1335.7491           | 1335.7513     | 0.0022        | 2             | 280                 | 290             | VLNQQLTNHIR          |                |                |              |      |
| 1335.7491           | 1335.7513     | 0.0022        | 2             | 280                 | 290             | VLNQQLTNHIR          |                |                |              |      |
| 1335.7491           | 1335.7513     | 0.0022        | 2             | 280                 | 290             | VLNQQLTNHIR          |                |                |              |      |
| 1344.7118           | 1344.7107     | -0.0011       | -1            | 511                 | 522             | TSNGNQEILVIR         |                |                |              |      |
| 1709.8857           | 1709.8768     | -0.0089       | -5            | 143                 | 157             | VPVGDQPPDIEFQIR      | 26             | 85.265         |              |      |
| 1709.8857           | 1709.8768     | -0.0089       | -5            | 143                 | 157             | VPVGDQPPDIEFQIR      |                |                |              |      |
| 1867.8668           | 1867.8528     | -0.014        | -7            | 344                 | 361             | IEGSGDQIDTYELSGGAR   | 16             | 0              |              |      |
| 1867.8668           | 1867.8528     | -0.014        | -7            | 344                 | 361             | IEGSGDQIDTYELSGGAR   |                |                |              |      |
| 2300.2397           | 2300.1753     | -0.0644       | -28           | 394                 | 414             | NIHGIRTGLFTPLAFEATVK |                |                |              |      |

| Protein Name                              | Accession No. | Peptide Count | Protein Score | Protein Score C.I.% | Total Ion Score | Total Ion C.I. %        | Best Ion Score | Best Ion C.I.% | % Coverage   |      |
|-------------------------------------------|---------------|---------------|---------------|---------------------|-----------------|-------------------------|----------------|----------------|--------------|------|
| Transitional endoplasmic reticulum ATPase | spt P00572    | 8             | 149           | 100                 | 101             |                         | 100            | 47             | 99.93        | 14.4 |
| Peptide Information                       |               |               |               |                     |                 |                         |                |                |              |      |
| Calc. Mass                                | Obsrv. Mass   | ± da          | ± ppm         | Start Seq.          | End Seq.        | Sequence                | Ion Score      | C. I. %        | Modification |      |
| 837.5305                                  | 837.571       | 0.0405        | 48            | 232                 | 239             | AIGVKPPR                | 17             | 27.02          |              |      |
| 837.5305                                  | 837.571       | 0.0405        | 48            | 232                 | 239             | AIGVKPPR                | 17             | 22.695         |              |      |
| 837.5305                                  | 837.571       | 0.0405        | 48            | 232                 | 239             | AIGVKPPR                |                |                |              |      |
| 947.5672                                  | 947.5834      | 0.0162        | 17            | 148                 | 155             | KGDIFLVR                |                |                |              |      |
| 947.5672                                  | 947.5834      | 0.0162        | 17            | 148                 | 155             | KGDIFLVR                | 20             | 61.434         |              |      |
| 947.5672                                  | 947.5834      | 0.0162        | 17            | 148                 | 155             | KGDIFLVR                | 31             | 97.282         |              |      |
| 1075.5378                                 | 1075.527      | -0.0108       | -10           | 278                 | 287             | LAGESESNLR              |                |                |              |      |
| 1075.5378                                 | 1075.527      | -0.0108       | -10           | 278                 | 287             | LAGESESNLR              | 5              | 0              |              |      |
| 1116.5028                                 | 1116.4882     | -0.0146       | -13           | 587                 | 599             | GGNIGDGGGAADR           |                |                |              |      |
| 1242.6324                                 | 1242.5927     | -0.0397       | -32           | 366                 | 377             | EVDIGIPDATGR            |                |                |              |      |
| 1242.6324                                 | 1242.5927     | -0.0397       | -32           | 366                 | 377             | EVDIGIPDATGR            | 47             | 99.93          |              |      |
| 1408.6427                                 | 1408.6453     | 0.0026        | 2             | 734                 | 744             | DHFEEAMRFAR             |                |                |              |      |
| 1823.9174                                 | 1823.8531     | -0.0643       | -35           | 488                 | 502             | ELQELVQYPVEHPDK         |                |                |              |      |
| 2518.4253                                 | 2518.4868     | 0.0615        | 24            | 616                 | 638             | NVFIIGATNRPDIDPAILRPRGR |                |                |              |      |

| Protein Name                              | Accession No. | Peptide Count | Protein Score | Protein Score C.I.% | Total Ion Score | Total Ion C.I. % | Best Ion Score | Best Ion C.I.% | % Coverage   |      |
|-------------------------------------------|---------------|---------------|---------------|---------------------|-----------------|------------------|----------------|----------------|--------------|------|
| Transitional endoplasmic reticulum ATPase | spt P00572    | 11            | 172           | 100                 | 108             |                  | 100            | 55             | 99.988       | 17.1 |
| Peptide Information                       |               |               |               |                     |                 |                  |                |                |              |      |
| Calc. Mass                                | Obsrv. Mass   | ± da          | ± ppm         | Start Seq.          | End Seq.        | Sequence         | Ion Score      | C. I. %        | Modification |      |
| 837.5305                                  | 837.5698      | 0.0393        | 47            | 232                 | 239             | AIGVKPPR         | 19             | 43.13          |              |      |
| 837.5305                                  | 837.5698      | 0.0393        | 47            | 232                 | 239             | AIGVKPPR         | 17             | 10.487         |              |      |
| 837.5305                                  | 837.5698      | 0.0393        | 47            | 232                 | 239             | AIGVKPPR         |                |                |              |      |
| 947.5672                                  | 947.5832      | 0.016         | 17            | 148                 | 155             | KGDIFLVR         |                |                |              |      |
| 947.5672                                  | 947.5832      | 0.016         | 17            | 148                 | 155             | KGDIFLVR         | 34             | 98.521         |              |      |

|           |           |         |     |     |     |                         |    |        |
|-----------|-----------|---------|-----|-----|-----|-------------------------|----|--------|
| 947.5672  | 947.5832  | 0.016   | 17  | 148 | 155 | KGDIFLVR                | 26 | 90.453 |
| 1075.5378 | 1075.5292 | -0.0086 | -8  | 278 | 287 | LAGESESNLR              |    |        |
| 1116.5028 | 1116.4899 | -0.0129 | -12 | 587 | 599 | GGNIGDGGGAADR           |    |        |
| 1118.5801 | 1118.5591 | -0.021  | -19 | 701 | 709 | ESIESEIRR               |    |        |
| 1118.5801 | 1118.5591 | -0.021  | -19 | 701 | 709 | ESIESEIRR               |    |        |
| 1203.6328 | 1203.6012 | -0.0316 | -26 | 278 | 288 | LAGESESNLRK             |    |        |
| 1242.6324 | 1242.5959 | -0.0365 | -29 | 366 | 377 | EVDIGIPDATGR            | 55 | 99.988 |
| 1242.6324 | 1242.5959 | -0.0365 | -29 | 366 | 377 | EVDIGIPDATGR            |    |        |
| 1329.691  | 1329.6427 | -0.0483 | -36 | 454 | 465 | WALSQSNPSALR            |    |        |
| 1408.6427 | 1408.649  | 0.0063  | 4   | 734 | 744 | DHFEEAMRFAR             |    |        |
| 1823.9174 | 1823.865  | -0.0524 | -29 | 488 | 502 | ELQELVQYPVEHPDK         |    |        |
| 2518.4253 | 2518.498  | 0.0727  | 29  | 616 | 638 | NVFIIGATNRPDIIDPAILRPGR |    |        |

| Protein Name                            | Accession No. | Peptide Count | Protein Score | Protein Score C.I.% | Total Ion Score | Total Ion C.I. % | Best Ion Score | Best Ion C.I.% | % Coverage |      |
|-----------------------------------------|---------------|---------------|---------------|---------------------|-----------------|------------------|----------------|----------------|------------|------|
| NADH dehydrogenase (ubiquinone) Fe-S pr | gij53850628   | 13            | 297           | 100                 | 200             |                  | 100            | 48             | 99.88      | 22.3 |

Peptide Information

| Calc. Mass | Obsrv. Mass | ± da    | ± ppm | Start Seq. | End Seq. | Sequence                  | Ion Score | C. I. % | Modification |
|------------|-------------|---------|-------|------------|----------|---------------------------|-----------|---------|--------------|
| 980.5887   | 980.6003    | 0.0116  | 12    | 608        | 617      | VAVTPPGLAR                |           |         |              |
| 980.5887   | 980.6003    | 0.0116  | 12    | 608        | 617      | VAVTPPGLAR                | 20        | 29.728  |              |
| 1064.5524  | 1064.5459   | -0.0065 | -6    | 409        | 417      | FEAPLFNAR                 | 48        | 99.88   |              |
| 1064.5524  | 1064.5459   | -0.0065 | -6    | 409        | 417      | FEAPLFNAR                 | 42        | 99.534  |              |
| 1064.5524  | 1064.5459   | -0.0065 | -6    | 409        | 417      | FEAPLFNAR                 |           |         |              |
| 1066.5383  | 1066.536    | -0.0023 | -2    | 703        | 712      | ASQTMAKCVK                |           |         |              |
| 1083.6156  | 1083.6028   | -0.0128 | -12   | 646        | 655      | LGEVSPNLVR                | 8         | 0       |              |
| 1083.6156  | 1083.6028   | -0.0128 | -12   | 646        | 655      | LGEVSPNLVR                |           |         |              |
| 1097.5222  | 1097.5112   | -0.011  | -10   | 593        | 602      | SATYVNTEGR                |           |         |              |
| 1403.7893  | 1403.7379   | -0.0514 | -37   | 429        | 441      | VALIGSPVDLTYR             | 25        | 77.313  |              |
| 1403.7893  | 1403.7379   | -0.0514 | -37   | 429        | 441      | VALIGSPVDLTYR             |           |         |              |
| 1403.7893  | 1403.7379   | -0.0514 | -37   | 429        | 441      | VALIGSPVDLTYR             | 33        | 96.478  |              |
| 1558.786   | 1558.7281   | -0.0579 | -37   | 451        | 464      | ILQDIASGNHEFSK            |           |         |              |
| 1608.7864  | 1608.7225   | -0.0639 | -40   | 185        | 200      | FASEIAGVDDLGTTR           |           |         |              |
| 1608.7864  | 1608.7225   | -0.0639 | -40   | 185        | 200      | FASEIAGVDDLGTTR           | 24        | 72.974  |              |
| 1611.8013  | 1611.7347   | -0.0666 | -41   | 312        | 325      | GLLTYTSWEDALSR            |           |         |              |
| 1611.8013  | 1611.7347   | -0.0666 | -41   | 312        | 325      | GLLTYTSWEDALSR            | 4         | 0       |              |
| 2071.1545  | 2071.1133   | -0.0412 | -20   | 519        | 538      | IASQVAALDLGYKPGVEAIR      |           |         |              |
| 2071.1545  | 2071.1133   | -0.0412 | -20   | 519        | 538      | IASQVAALDLGYKPGVEAIR      | 27        | 86.455  |              |
| 2071.1545  | 2071.1133   | -0.0412 | -20   | 519        | 538      | IASQVAALDLGYKPGVEAIR      | 22        | 54.209  |              |
| 2075.1018  | 2075.0698   | -0.032  | -15   | 625        | 643      | ALSEIAGITLPYDTLDQVR       |           |         |              |
| 2075.1018  | 2075.0698   | -0.032  | -15   | 625        | 643      | ALSEIAGITLPYDTLDQVR       | 34        | 97.177  |              |
| 2199.2495  | 2199.2139   | -0.0356 | -16   | 519        | 539      | IASQVAALDLGYKPGVEAIRK     |           |         |              |
| 2758.4622  | 2758.571    | 0.1088  | 39    | 383        | 408      | SNYLLNTTIAGVEEADVLLVGTNPR |           |         |              |

| Protein Name              | Accession No. | Peptide Count | Protein Score | Protein Score C.I.% | Total Ion Score | Total Ion C.I. % | Best Ion Score | Best Ion C.I.% | % Coverage |      |
|---------------------------|---------------|---------------|---------------|---------------------|-----------------|------------------|----------------|----------------|------------|------|
| Heat shock 70kD protein 5 | cra CP25304   | 12            | 179           | 100                 | 75              |                  | 100            | 24             | 71.237     | 22.4 |

Peptide Information

| Calc. Mass | Obsrv. Mass | ± da    | ± ppm | Start Seq. | End Seq. | Sequence       | Ion Score | C. I. % | Modification |
|------------|-------------|---------|-------|------------|----------|----------------|-----------|---------|--------------|
| 986.5153   | 986.5384    | 0.0231  | 23    | 533        | 540      | LTPEEIER       |           |         |              |
| 997.5173   | 997.5626    | 0.0453  | 45    | 298        | 306      | ALSSQHQAR      |           |         |              |
| 1074.5538  | 1074.5909   | 0.0371  | 35    | 524        | 532      | ITITNDQNR      |           |         |              |
| 1191.6368  | 1191.6481   | 0.0113  | 9     | 465        | 474      | VYEGERPLTK     |           |         |              |
| 1191.6368  | 1191.6481   | 0.0113  | 9     | 465        | 474      | VYEGERPLTK     |           |         |              |
| 1191.6368  | 1191.6481   | 0.0113  | 9     | 465        | 474      | VYEGERPLTK     |           |         |              |
| 1228.6281  | 1228.6337   | 0.0056  | 5     | 50         | 60       | VEIANDQGNR     | 11        | 0       |              |
| 1228.6281  | 1228.6337   | 0.0056  | 5     | 50         | 60       | VEIANDQGNR     |           |         |              |
| 1460.759   | 1460.7573   | -0.0017 | -1    | 354        | 367      | SDIDEIVLVGGSTR |           |         |              |
| 1460.759   | 1460.7573   | -0.0017 | -1    | 354        | 367      | SDIDEIVLVGGSTR |           |         |              |

|           |           |         |     |     |     |                    |    |  |        |  |
|-----------|-----------|---------|-----|-----|-----|--------------------|----|--|--------|--|
| 1566.7798 | 1566.7679 | -0.0119 | -8  | 61  | 74  | ITPSYVAFTPEGER     |    |  |        |  |
| 1566.7798 | 1566.7679 | -0.0119 | -8  | 61  | 74  | ITPSYVAFTPEGER     | 14 |  | 0      |  |
| 1566.7798 | 1566.7679 | -0.0119 | -8  | 61  | 74  | ITPSYVAFTPEGER     | 14 |  | 0      |  |
| 1588.854  | 1588.8423 | -0.0117 | -7  | 353 | 367 | KSDIDEIVLVGGSTR    |    |  |        |  |
| 1815.9963 | 1815.9755 | -0.0208 | -11 | 198 | 214 | IINEPTAAAIYGLDKR   |    |  |        |  |
| 1887.9712 | 1887.9561 | -0.0151 | -8  | 165 | 181 | VTHAVVTVPAYFNDAQR  | 16 |  | 0      |  |
| 1887.9712 | 1887.9561 | -0.0151 | -8  | 165 | 181 | VTHAVVTVPAYFNDAQR  |    |  |        |  |
| 1934.0131 | 1933.9957 | -0.0174 | -9  | 475 | 492 | DNHLLGTFDLTGIPPAPR | 24 |  | 66.824 |  |
| 1934.0131 | 1933.9957 | -0.0174 | -9  | 475 | 492 | DNHLLGTFDLTGIPPAPR | 24 |  | 71.237 |  |
| 1934.0131 | 1933.9957 | -0.0174 | -9  | 475 | 492 | DNHLLGTFDLTGIPPAPR |    |  |        |  |
| 2148.9971 | 2148.9854 | -0.0117 | -5  | 307 | 324 | IEIESFFEGEDFSETLTR | 10 |  | 0      |  |
| 2148.9971 | 2148.9854 | -0.0117 | -5  | 307 | 324 | IEIESFFEGEDFSETLTR |    |  |        |  |

| Protein Name          | Accession No. | Peptide Count | Protein Score | Protein Score C.I.% | Total Ion Score | Total Ion C.I. % | Best Ion Score | Best Ion C.I.% | % Coverage |      |
|-----------------------|---------------|---------------|---------------|---------------------|-----------------|------------------|----------------|----------------|------------|------|
| Heat shock protein 73 | gi 13242237   | 6             | 64            | 99.167              | 24              |                  | 87.028         | 24             | 87.028     | 12.8 |

| Peptide Information | Calc. Mass | Obsrv. Mass | ± da    | ± ppm | Start Seq. | End Seq. | Sequence           | Ion Score | C. I. % | Modification |
|---------------------|------------|-------------|---------|-------|------------|----------|--------------------|-----------|---------|--------------|
|                     | 1199.6742  | 1199.642    | -0.0322 | -27   | 160        | 171      | DAGTIAGLNVLR       |           |         |              |
|                     | 1253.6161  | 1253.5853   | -0.0308 | -25   | 302        | 311      | FEELNADLFR         |           |         |              |
|                     | 1481.807   | 1481.7478   | -0.0592 | -40   | 329        | 342      | SQIHDIIVLVGGSTR    |           |         |              |
|                     | 1481.807   | 1481.7478   | -0.0592 | -40   | 329        | 342      | SQIHDIIVLVGGSTR    |           |         |              |
|                     | 1487.7013  | 1487.6543   | -0.047  | -32   | 37         | 49       | TTPSYVAFTDTER      |           |         |              |
|                     | 1691.7256  | 1691.6763   | -0.0493 | -29   | 221        | 236      | STAGDTHLGGEDFDNR   | 24        | 87.028  |              |
|                     | 1691.7256  | 1691.6763   | -0.0493 | -29   | 221        | 236      | STAGDTHLGGEDFDNR   |           |         |              |
|                     | 1981.9978  | 1981.9558   | -0.042  | -21   | 138        | 155      | TVTNAVVTVPAYFNDSQR |           |         |              |

| Protein Name                             | Accession No. | Peptide Count | Protein Score | Protein Score C.I.% | Total Ion Score | Total Ion C.I. % | Best Ion Score | Best Ion C.I.% | % Coverage |      |
|------------------------------------------|---------------|---------------|---------------|---------------------|-----------------|------------------|----------------|----------------|------------|------|
| Succinate dehydrogenase complex, subunit | gi 18426858   | 8             | 84            | 99.993              | 29              |                  | 93.87          | 16             | 0          | 16.2 |

| Peptide Information | Calc. Mass | Obsrv. Mass | ± da    | ± ppm | Start Seq. | End Seq. | Sequence          | Ion Score | C. I. % | Modification |
|---------------------|------------|-------------|---------|-------|------------|----------|-------------------|-----------|---------|--------------|
|                     | 1122.5902  | 1122.5731   | -0.0171 | -15   | 243        | 253      | NTIATGGYGR        |           |         |              |
|                     | 1122.5902  | 1122.5731   | -0.0171 | -15   | 243        | 253      | NTIATGGYGR        | 11        | 0       |              |
|                     | 1122.5902  | 1122.5731   | -0.0171 | -15   | 243        | 253      | NTIATGGYGR        |           |         |              |
|                     | 1318.7366  | 1318.6904   | -0.0462 | -35   | 629        | 639      | VTLDYRVIDK        |           |         |              |
|                     | 1318.7366  | 1318.6904   | -0.0462 | -35   | 629        | 639      | VTLDYRVIDK        |           |         |              |
|                     | 1329.6757  | 1329.6276   | -0.0481 | -36   | 305        | 317      | GEGGILINSQGER     | 2         | 0       |              |
|                     | 1329.6757  | 1329.6276   | -0.0481 | -36   | 305        | 317      | GEGGILINSQGER     |           |         |              |
|                     | 1329.6757  | 1329.6276   | -0.0481 | -36   | 305        | 317      | GEGGILINSQGER     |           |         |              |
|                     | 1354.7227  | 1354.673    | -0.0497 | -37   | 188        | 199      | TGHSLLTLYGR       |           |         |              |
|                     | 1354.7227  | 1354.673    | -0.0497 | -37   | 188        | 199      | TGHSLLTLYGR       |           |         |              |
|                     | 1400.7533  | 1400.7      | -0.0533 | -38   | 531        | 542      | VSQLYGDLQHLK      |           |         |              |
|                     | 1473.8424  | 1473.785    | -0.0574 | -39   | 444        | 457      | LGANSLDLVVFGR     | 16        | 0       |              |
|                     | 1473.8424  | 1473.785    | -0.0574 | -39   | 444        | 457      | LGANSLDLVVFGR     |           |         |              |
|                     | 1812.865   | 1812.8054   | -0.0596 | -33   | 593        | 607      | IDEYDYSKPIEGQQK   |           |         |              |
|                     | 2167.1406  | 2167.1191   | -0.0215 | -10   | 354        | 371      | DHVYLQLHHLPEQLATR |           |         |              |

| Protein Name            | Accession No. | Peptide Count | Protein Score | Protein Score C.I.% | Total Ion Score | Total Ion C.I. % | Best Ion Score | Best Ion C.I.% | % Coverage |      |
|-------------------------|---------------|---------------|---------------|---------------------|-----------------|------------------|----------------|----------------|------------|------|
| Serum Albumin Precursor | spt P02770    | 10            | 200           | 100                 | 133             |                  | 100            | 46             | 99.815     | 14.6 |

| Peptide Information | Calc. Mass | Obsrv. Mass | ± da    | ± ppm | Start Seq. | End Seq. | Sequence     | Ion Score | C. I. % | Modification |
|---------------------|------------|-------------|---------|-------|------------|----------|--------------|-----------|---------|--------------|
|                     | 1248.6371  | 1248.601    | -0.0361 | -29   | 35         | 44       | FKDLGEQHFHFK |           |         |              |
|                     | 1266.6365  | 1266.6023   | -0.0342 | -27   | 247        | 257      | FPNAEFAEITK  |           |         |              |
|                     | 1266.6365  | 1266.6023   | -0.0342 | -27   | 247        | 257      | FPNAEFAEITK  |           |         |              |
|                     | 1299.7056  | 1299.6666   | -0.039  | -30   | 362        | 372      | HPDYSVSLLLR  | 11        | 0       |              |
|                     | 1299.7056  | 1299.6666   | -0.039  | -30   | 362        | 372      | HPDYSVSLLLR  |           |         |              |

|           |           |         |     |     |     |                     |    |        |
|-----------|-----------|---------|-----|-----|-----|---------------------|----|--------|
| 1299.7056 | 1299.6666 | -0.039  | -30 | 362 | 372 | HPDYSVSLLLR         | 10 | 0      |
| 1439.7853 | 1439.7335 | -0.0518 | -36 | 439 | 452 | APQVSTPTLVEAAR      |    |        |
| 1439.7853 | 1439.7335 | -0.0518 | -36 | 439 | 452 | APQVSTPTLVEAAR      | 46 | 99.797 |
| 1453.7355 | 1453.7324 | -0.0031 | -2  | 410 | 421 | NLVKTNCELYEK        |    |        |
| 1453.7355 | 1453.7324 | -0.0031 | -2  | 410 | 421 | NLVKTNCELYEK        |    |        |
| 1455.8066 | 1455.7371 | -0.0695 | -48 | 361 | 372 | RHPDYSVSLLLR        |    |        |
| 1465.7798 | 1465.7249 | -0.0549 | -37 | 422 | 434 | LGEYGFQNAVLVR       |    |        |
| 1465.7798 | 1465.7249 | -0.0549 | -37 | 422 | 434 | LGEYGFQNAVLVR       | 36 | 97.949 |
| 1465.7798 | 1465.7249 | -0.0549 | -37 | 422 | 434 | LGEYGFQNAVLVR       | 46 | 99.815 |
| 1609.7897 | 1609.7301 | -0.0596 | -37 | 348 | 360 | DVFLGTFLYEYSR       | 31 | 93.96  |
| 1609.7897 | 1609.7301 | -0.0596 | -37 | 348 | 360 | DVFLGTFLYEYSR       |    |        |
| 2060.0276 | 2059.9717 | -0.0559 | -27 | 169 | 184 | RHPYFYAPPELLYYAEK   |    |        |
| 2230.1213 | 2230.2    | 0.0787  | 35  | 509 | 527 | RPCFSALTVDETYVPKEFK |    |        |

| Protein Name          | Accession No. | Peptide Count | Protein Score | Protein Score C.I.% | Total Ion Score | Total Ion C.I. %         | Best Ion Score | Best Ion C.I.% | % Coverage   |      |
|-----------------------|---------------|---------------|---------------|---------------------|-----------------|--------------------------|----------------|----------------|--------------|------|
| Heat shock protein 73 | gil13242237   | 13            | 437           | 100                 | 339             |                          | 100            | 79             | 100          | 24.9 |
| Peptide Information   |               |               |               |                     |                 |                          |                |                |              |      |
| Calc. Mass            | Obsrv. Mass   | ± da          | ± ppm         | Start Seq.          | End Seq.        | Sequence                 | Ion Score      | C. I. %        | Modification |      |
| 861.4424              | 861.4788      | 0.0364        | 42            | 252                 | 258             | DISENKR                  |                |                |              |      |
| 861.4424              | 861.4788      | 0.0364        | 42            | 252                 | 258             | DISENKR                  | 6              | 0              |              |      |
| 1081.5676             | 1081.5577     | -0.0099       | -9            | 349                 | 357             | LLQDFFGNK                |                |                |              |      |
| 1197.6626             | 1197.6338     | -0.0288       | -24           | 459                 | 469             | FELTGIPPAPR              |                |                |              |      |
| 1197.6626             | 1197.6338     | -0.0288       | -24           | 459                 | 469             | FELTGIPPAPR              | 1              | 0              |              |      |
| 1199.6742             | 1199.6482     | -0.026        | -22           | 160                 | 171             | DAGTIAGLNVLR             |                |                |              |      |
| 1199.6742             | 1199.6482     | -0.026        | -22           | 160                 | 171             | DAGTIAGLNVLR             | 27             | 85.602         |              |      |
| 1228.6281             | 1228.5988     | -0.0293       | -24           | 26                  | 36              | VEIANDQGNR               |                |                |              |      |
| 1228.6281             | 1228.5988     | -0.0293       | -24           | 26                  | 36              | VEIANDQGNR               | 41             | 99.405         |              |      |
| 1253.6161             | 1253.5824     | -0.0337       | -27           | 302                 | 311             | FEELNADLFR               |                |                |              |      |
| 1253.6161             | 1253.5824     | -0.0337       | -27           | 302                 | 311             | FEELNADLFR               | 79             | 100            |              |      |
| 1253.6161             | 1253.5824     | -0.0337       | -27           | 302                 | 311             | FEELNADLFR               | 73             | 100            |              |      |
| 1480.7543             | 1480.7019     | -0.0524       | -35           | 300                 | 311             | ARFEELNADLFR             |                |                |              |      |
| 1480.7543             | 1480.7019     | -0.0524       | -35           | 300                 | 311             | ARFEELNADLFR             |                |                |              |      |
| 1481.807              | 1481.7521     | -0.0549       | -37           | 329                 | 342             | SQIHDIIVLVGGSTR          |                |                |              |      |
| 1481.807              | 1481.7521     | -0.0549       | -37           | 329                 | 342             | SQIHDIIVLVGGSTR          | 45             | 99.754         |              |      |
| 1487.7013             | 1487.6484     | -0.0529       | -36           | 37                  | 49              | TTPSYVAFTDTER            | 7              | 0              |              |      |
| 1487.7013             | 1487.6484     | -0.0529       | -36           | 37                  | 49              | TTPSYVAFTDTER            |                |                |              |      |
| 1691.7256             | 1691.6685     | -0.0571       | -34           | 221                 | 236             | STAGDTHLGGEDFDNR         | 67             | 99.999         |              |      |
| 1691.7256             | 1691.6685     | -0.0571       | -34           | 221                 | 236             | STAGDTHLGGEDFDNR         |                |                |              |      |
| 1691.7256             | 1691.6685     | -0.0571       | -34           | 221                 | 236             | STAGDTHLGGEDFDNR         | 74             | 100            |              |      |
| 1745.809              | 1745.7594     | -0.0496       | -28           | 584                 | 597             | NQTAEKEEFEHQK            |                |                |              |      |
| 1745.809              | 1745.7594     | -0.0496       | -28           | 584                 | 597             | NQTAEKEEFEHQK            |                |                |              |      |
| 1981.9978             | 1981.9542     | -0.0436       | -22           | 138                 | 155             | TVTNAVVTVPAYFNDSQR       | 34             | 97.054         |              |      |
| 1981.9978             | 1981.9542     | -0.0436       | -22           | 138                 | 155             | TVTNAVVTVPAYFNDSQR       | 31             | 94.809         |              |      |
| 1981.9978             | 1981.9542     | -0.0436       | -22           | 138                 | 155             | TVTNAVVTVPAYFNDSQR       |                |                |              |      |
| 2774.3267             | 2774.4568     | 0.1301        | 47            | 424                 | 447             | QTQTFTTYSDNQPGVLIQVYEGER | 28             | 88.107         |              |      |
| 2774.3267             | 2774.4568     | 0.1301        | 47            | 424                 | 447             | QTQTFTTYSDNQPGVLIQVYEGER |                |                |              |      |

| Protein Name                                | Accession No. | Peptide Count | Protein Score | Protein Score C.I.% | Total Ion Score | Total Ion C.I. % | Best Ion Score | Best Ion C.I.% | % Coverage   |      |
|---------------------------------------------|---------------|---------------|---------------|---------------------|-----------------|------------------|----------------|----------------|--------------|------|
| Dihydropyrimidinase related protein-2 (DRP) | spt P47942    | 9             | 278           | 100                 | 206             |                  | 100            | 44             | 99.559       | 22.2 |
| Peptide Information                         |               |               |               |                     |                 |                  |                |                |              |      |
| Calc. Mass                                  | Obsrv. Mass   | ± da          | ± ppm         | Start Seq.          | End Seq.        | Sequence         | Ion Score      | C. I. %        | Modification |      |
| 908.4988                                    | 908.5223      | 0.0235        | 26            | 391                 | 397             | VFNLVYPR         |                |                |              |      |
| 908.4988                                    | 908.5223      | 0.0235        | 26            | 391                 | 397             | VFNLVYPR         | 43             | 99.467         |              |      |
| 908.4988                                    | 908.5223      | 0.0235        | 26            | 391                 | 397             | VFNLVYPR         | 36             | 97.454         |              |      |
| 1015.553                                    | 1015.5703     | 0.0173        | 17            | 259                 | 268             | SAAEVIAQAR       | 23             | 41.01          |              |      |
| 1015.553                                    | 1015.5703     | 0.0173        | 17            | 259                 | 268             | SAAEVIAQAR       |                |                |              |      |

|           |           |         |     |     |     |                       |    |        |
|-----------|-----------|---------|-----|-----|-----|-----------------------|----|--------|
| 1015.553  | 1015.5703 | 0.0173  | 17  | 259 | 268 | SAAEVIAQAR            | 22 | 31.329 |
| 1140.6088 | 1140.6252 | 0.0164  | 14  | 472 | 480 | KPFDFVYK              |    |        |
| 1140.6088 | 1140.6252 | 0.0164  | 14  | 472 | 480 | KPFDFVYK              |    |        |
| 1246.6348 | 1246.6833 | 0.0485  | 39  | 147 | 157 | GIQEEMEALVK           |    |        |
| 1682.8707 | 1682.8523 | -0.0184 | -11 | 452 | 467 | IVLEDGTLHVTEGSGR      |    |        |
| 1682.8707 | 1682.8523 | -0.0184 | -11 | 452 | 467 | IVLEDGTLHVTEGSGR      | 22 | 32.271 |
| 1682.8707 | 1682.8523 | -0.0184 | -11 | 452 | 467 | IVLEDGTLHVTEGSGR      | 22 | 31.17  |
| 1792.8348 | 1792.8182 | -0.0166 | -9  | 346 | 361 | DNFTLIPEGTNGTEER      |    |        |
| 1792.8348 | 1792.8182 | -0.0166 | -9  | 346 | 361 | DNFTLIPEGTNGTEER      | 44 | 99.559 |
| 1911.0222 | 1910.9985 | -0.0237 | -12 | 174 | 189 | FQLTDSQIYEVLSVIR      | 14 | 0      |
| 1911.0222 | 1910.9985 | -0.0237 | -12 | 174 | 189 | FQLTDSQIYEVLSVIR      | 24 | 61.205 |
| 1911.0222 | 1910.9985 | -0.0237 | -12 | 174 | 189 | FQLTDSQIYEVLSVIR      |    |        |
| 2169.0684 | 2169.0444 | -0.024  | -11 | 533 | 552 | NLHQSGFSLSGAQIDDNIPR  | 25 | 63.711 |
| 2169.0684 | 2169.0444 | -0.024  | -11 | 533 | 552 | NLHQSGFSLSGAQIDDNIPR  |    |        |
| 2377.1741 | 2377.1543 | -0.0198 | -8  | 190 | 211 | DIGAIAQVHAENGDIIEEQQR | 25 | 66.904 |
| 2377.1741 | 2377.1543 | -0.0198 | -8  | 190 | 211 | DIGAIAQVHAENGDIIEEQQR |    |        |

| Protein Name               | Accession No. | Peptide Count | Protein Score | Protein Score C.I.% | Total Ion Score | Total Ion C.I. %         | Best Ion Score | Best Ion C.I.% | % Coverage   |      |
|----------------------------|---------------|---------------|---------------|---------------------|-----------------|--------------------------|----------------|----------------|--------------|------|
| Tubulin, alpha 1C          | gi 58865538   | 6             | 118           | 100                 | 62              |                          | 99.998         | 50             | 99.963       | 16.3 |
| <b>Peptide Information</b> |               |               |               |                     |                 |                          |                |                |              |      |
| Calc. Mass                 | Obsrv. Mass   | ± da          | ± ppm         | Start Seq.          | End Seq.        | Sequence                 | Ion Score      | C. I. %        | Modification |      |
| 1085.6201                  | 1085.6077     | -0.0124       | -11           | 113                 | 121             | EIDLVLDR                 | 12             | 0              |              |      |
| 1085.6201                  | 1085.6077     | -0.0124       | -11           | 113                 | 121             | EIDLVLDR                 |                |                |              |      |
| 1487.8792                  | 1487.8196     | -0.0596       | -40           | 230                 | 243             | LISQIVSSITASLR           |                |                |              |      |
| 1701.9058                  | 1701.842      | -0.0638       | -37           | 65                  | 79              | AVFVDLEPTVIDEVR          |                |                |              |      |
| 1701.9058                  | 1701.842      | -0.0638       | -37           | 65                  | 79              | AVFVDLEPTVIDEVR          | 50             | 99.963         |              |      |
| 1718.8821                  | 1718.8239     | -0.0582       | -34           | 216                 | 229             | NLDIERPTYTNLNR           |                |                |              |      |
| 2409.2085                  | 2409.2214     | 0.0129        | 5             | 244                 | 264             | FDGALNVDLTFEQTNLVPYPR    |                |                |              |      |
| 2707.2854                  | 2707.3733     | 0.0879        | 32            | 281                 | 304             | AYHEQLTVAEITNACFEPANQMVK |                |                |              |      |

| Protein Name               | Accession No. | Peptide Count | Protein Score | Protein Score C.I.% | Total Ion Score | Total Ion C.I. % | Best Ion Score | Best Ion C.I.% | % Coverage   |      |
|----------------------------|---------------|---------------|---------------|---------------------|-----------------|------------------|----------------|----------------|--------------|------|
| Heat shock protein 73      | gi 13242237   | 14            | 498           | 100                 | 388             |                  | 100            | 86             | 100          | 25.4 |
| <b>Peptide Information</b> |               |               |               |                     |                 |                  |                |                |              |      |
| Calc. Mass                 | Obsrv. Mass   | ± da          | ± ppm         | Start Seq.          | End Seq.        | Sequence         | Ion Score      | C. I. %        | Modification |      |
| 861.4424                   | 861.4396      | -0.0028       | -3            | 252                 | 258             | DISENKR          | 23             | 53.094         |              |      |
| 861.4424                   | 861.4396      | -0.0028       | -3            | 252                 | 258             | DISENKR          |                |                |              |      |
| 1081.5676                  | 1081.5653     | -0.0023       | -2            | 349                 | 357             | LLQDFFNGK        |                |                |              |      |
| 1081.5676                  | 1081.5653     | -0.0023       | -2            | 349                 | 357             | LLQDFFNGK        | 4              | 0              |              |      |
| 1197.6626                  | 1197.6584     | -0.0042       | -4            | 459                 | 469             | FELTGIPPAPR      | 12             | 0              |              |      |
| 1197.6626                  | 1197.6584     | -0.0042       | -4            | 459                 | 469             | FELTGIPPAPR      |                |                |              |      |
| 1199.6742                  | 1199.6736     | -0.0006       | -1            | 160                 | 171             | DAGTIAGLNVLR     |                |                |              |      |
| 1199.6742                  | 1199.6736     | -0.0006       | -1            | 160                 | 171             | DAGTIAGLNVLR     | 18             | 0              |              |      |
| 1228.6281                  | 1228.6274     | -0.0007       | -1            | 26                  | 36              | VEIANDQQGNR      | 31             | 92.982         |              |      |
| 1228.6281                  | 1228.6274     | -0.0007       | -1            | 26                  | 36              | VEIANDQQGNR      |                |                |              |      |
| 1253.6161                  | 1253.6144     | -0.0017       | -1            | 302                 | 311             | FEELNADLFR       | 79             | 100            |              |      |
| 1253.6161                  | 1253.6144     | -0.0017       | -1            | 302                 | 311             | FEELNADLFR       | 77             | 100            |              |      |
| 1253.6161                  | 1253.6144     | -0.0017       | -1            | 302                 | 311             | FEELNADLFR       |                |                |              |      |
| 1450.8053                  | 1450.7566     | -0.0487       | -34           | 346                 | 357             | IQKLLQDFFNGK     |                |                |              |      |
| 1480.7543                  | 1480.7552     | 0.0009        | 1             | 300                 | 311             | ARFEELNADLFR     |                |                |              |      |
| 1480.7543                  | 1480.7552     | 0.0009        | 1             | 300                 | 311             | ARFEELNADLFR     |                |                |              |      |
| 1481.807                   | 1481.8018     | -0.0052       | -4            | 329                 | 342             | SQIHDIIVLVGGSTR  | 51             | 99.928         |              |      |
| 1481.807                   | 1481.8018     | -0.0052       | -4            | 329                 | 342             | SQIHDIIVLVGGSTR  |                |                |              |      |
| 1487.7013                  | 1487.6997     | -0.0016       | -1            | 37                  | 49              | TTPSYVAFTDTER    | 5              | 0              |              |      |
| 1487.7013                  | 1487.6997     | -0.0016       | -1            | 37                  | 49              | TTPSYVAFTDTER    |                |                |              |      |
| 1691.7256                  | 1691.7236     | -0.002        | -1            | 221                 | 236             | STAGDTHLGGEDFDNR |                |                |              |      |
| 1691.7256                  | 1691.7236     | -0.002        | -1            | 221                 | 236             | STAGDTHLGGEDFDNR | 61             | 99.993         |              |      |

|           |           |         |    |     |     |                         |    |        |
|-----------|-----------|---------|----|-----|-----|-------------------------|----|--------|
| 1691.7256 | 1691.7236 | -0.002  | -1 | 221 | 236 | STAGDTHLGGEDFDNR        | 86 | 100    |
| 1745.809  | 1745.8121 | 0.0031  | 2  | 584 | 597 | NQTAEKEEFEHQK           |    |        |
| 1745.809  | 1745.8121 | 0.0031  | 2  | 584 | 597 | NQTAEKEEFEHQK           |    |        |
| 1981.9978 | 1981.9913 | -0.0065 | -3 | 138 | 155 | TVTNAVVTVPAYFNDSQR      | 33 | 94.749 |
| 1981.9978 | 1981.9913 | -0.0065 | -3 | 138 | 155 | TVTNAVVTVPAYFNDSQR      |    |        |
| 1981.9978 | 1981.9913 | -0.0065 | -3 | 138 | 155 | TVTNAVVTVPAYFNDSQR      | 34 | 96.17  |
| 2774.3267 | 2774.3086 | -0.0181 | -7 | 424 | 447 | QTQFTTYSDNQPGVLIQVYEGER |    |        |
| 2774.3267 | 2774.3086 | -0.0181 | -7 | 424 | 447 | QTQFTTYSDNQPGVLIQVYEGER | 44 | 99.582 |

| Protein Name                                | Accession No. | Peptide Count | Protein Score | Protein Score C.I.% | Total Ion Score | Total Ion C.I. % | Best Ion Score | Best Ion C.I.% | % Coverage |
|---------------------------------------------|---------------|---------------|---------------|---------------------|-----------------|------------------|----------------|----------------|------------|
| Dihydropyrimidinase related protein-2 (DRP) | spt P47942    | 8             | 217           | 100                 | 135             | 100              | 35             | 97.699         | 20.6       |

| Peptide Information | Calc. Mass | Obsrv. Mass | ± da    | ± ppm | Start Seq. | End Seq. | Sequence                 | Ion Score | C. I. % | Modification |
|---------------------|------------|-------------|---------|-------|------------|----------|--------------------------|-----------|---------|--------------|
|                     | 908.4988   | 908.5234    | 0.0246  | 27    | 391        | 397      | VFNLVYPR                 |           |         |              |
|                     | 908.4988   | 908.5234    | 0.0246  | 27    | 391        | 397      | VFNLVYPR                 | 27        | 83.599  |              |
|                     | 908.4988   | 908.5234    | 0.0246  | 27    | 391        | 397      | VFNLVYPR                 | 29        | 90.117  |              |
|                     | 1015.553   | 1015.5529   | -0.0001 | 0     | 259        | 268      | SAAEVIAQAR               |           |         |              |
|                     | 1682.8707  | 1682.806    | -0.0647 | -38   | 452        | 467      | IVLEDGTLHVTEGSGR         | 25        | 76.564  |              |
|                     | 1682.8707  | 1682.806    | -0.0647 | -38   | 452        | 467      | IVLEDGTLHVTEGSGR         |           |         |              |
|                     | 1682.8707  | 1682.806    | -0.0647 | -38   | 452        | 467      | IVLEDGTLHVTEGSGR         | 24        | 68.531  |              |
|                     | 1792.8348  | 1792.7654   | -0.0694 | -39   | 346        | 361      | DNFTLIPEGTNGTEER         | 35        | 97.699  |              |
|                     | 1792.8348  | 1792.7654   | -0.0694 | -39   | 346        | 361      | DNFTLIPEGTNGTEER         |           |         |              |
|                     | 1911.0222  | 1910.9672   | -0.055  | -29   | 174        | 189      | FQLTDSQIYEVLSVIR         |           |         |              |
|                     | 1911.0222  | 1910.9672   | -0.055  | -29   | 174        | 189      | FQLTDSQIYEVLSVIR         | 20        | 23.814  |              |
|                     | 2169.0684  | 2169.0439   | -0.0245 | -11   | 533        | 552      | NLHQSGFSLSGAQIDDNIPR     | 25        | 73.765  |              |
|                     | 2169.0684  | 2169.0439   | -0.0245 | -11   | 533        | 552      | NLHQSGFSLSGAQIDDNIPR     |           |         |              |
|                     | 2377.1741  | 2377.1934   | 0.0193  | 8     | 190        | 211      | DIGAIAQVHAENGDIIEEQQR    |           |         |              |
|                     | 2377.1741  | 2377.1934   | 0.0193  | 8     | 190        | 211      | DIGAIAQVHAENGDIIEEQQR    |           |         |              |
|                     | 2748.489   | 2748.4299   | -0.0591 | -22   | 441        | 467      | GSPLVVISQGVLEDTLHVTEGSGR |           |         |              |
|                     | 2748.489   | 2748.4299   | -0.0591 | -22   | 441        | 467      | GSPLVVISQGVLEDTLHVTEGSGR |           |         |              |

| Protein Name        | Accession No. | Peptide Count | Protein Score | Protein Score C.I.% | Total Ion Score | Total Ion C.I. % | Best Ion Score | Best Ion C.I.% | % Coverage |
|---------------------|---------------|---------------|---------------|---------------------|-----------------|------------------|----------------|----------------|------------|
| T-complex protein 1 | gij 6981642   | 5             | 158           | 100                 | 125             | 100              | 45             | 99.842         | 11.7       |

| Peptide Information | Calc. Mass | Obsrv. Mass | ± da    | ± ppm | Start Seq. | End Seq. | Sequence          | Ion Score | C. I. % | Modification |
|---------------------|------------|-------------|---------|-------|------------|----------|-------------------|-----------|---------|--------------|
|                     | 1147.6106  | 1147.5947   | -0.0159 | -14   | 434        | 443      | EQLAIAEFAR        |           |         |              |
|                     | 1147.6106  | 1147.5947   | -0.0159 | -14   | 434        | 443      | EQLAIAEFAR        | 23        | 73.679  |              |
|                     | 1205.6888  | 1205.6606   | -0.0282 | -23   | 516        | 526      | FATEAAITILR       |           |         |              |
|                     | 1411.6713  | 1411.6219   | -0.0494 | -35   | 469        | 480      | AFHNEAQVNPER      |           |         |              |
|                     | 1411.6713  | 1411.6219   | -0.0494 | -35   | 469        | 480      | AFHNEAQVNPER      | 32        | 96.747  |              |
|                     | 1411.6713  | 1411.6219   | -0.0494 | -35   | 469        | 480      | AFHNEAQVNPER      | 45        | 99.842  |              |
|                     | 1776.9126  | 1776.8523   | -0.0603 | -34   | 131        | 145      | YINENLIINTDELGR   | 32        | 96.717  |              |
|                     | 1776.9126  | 1776.8523   | -0.0603 | -34   | 131        | 145      | YINENLIINTDELGR   |           |         |              |
|                     | 1923.0909  | 1923.043    | -0.0479 | -25   | 248        | 264      | LGVQVVITDPEKLDQIR |           |         |              |
|                     | 1923.0909  | 1923.043    | -0.0479 | -25   | 248        | 264      | LGVQVVITDPEKLDQIR | 26        | 87.019  |              |

| Protein Name         | Accession No. | Peptide Count | Protein Score | Protein Score C.I.% | Total Ion Score | Total Ion C.I. % | Best Ion Score | Best Ion C.I.% | % Coverage |
|----------------------|---------------|---------------|---------------|---------------------|-----------------|------------------|----------------|----------------|------------|
| Heat Shock Protein 1 | gij 11560024  | 5             | 101           | 100                 | 62              | 99.992           | 25             | 61.877         | 14.5       |

| Peptide Information | Calc. Mass | Obsrv. Mass | ± da    | ± ppm | Start Seq. | End Seq. | Sequence          | Ion Score | C. I. % | Modification |
|---------------------|------------|-------------|---------|-------|------------|----------|-------------------|-----------|---------|--------------|
|                     | 960.5109   | 960.5261    | 0.0152  | 16    | 421        | 429      | VTDALNATR         |           |         |              |
|                     | 961.4849   | 961.5071    | 0.0222  | 23    | 302        | 310      | APGFGDNRK         | 3         | 0       |              |
|                     | 961.4849   | 961.5071    | 0.0222  | 23    | 302        | 310      | APGFGDNRK         |           |         |              |
|                     | 961.4849   | 961.5071    | 0.0222  | 23    | 302        | 310      | APGFGDNRK         |           |         |              |
|                     | 1905.0552  | 1904.9963   | -0.0589 | -31   | 251        | 268      | ISSVQSIVPALEIANHR |           |         |              |

|           |           |         |     |     |     |                           |    |        |
|-----------|-----------|---------|-----|-----|-----|---------------------------|----|--------|
| 1905.0552 | 1904.9963 | -0.0589 | -31 | 251 | 268 | ISSVQSVPALEIANAHR         | 23 | 48.574 |
| 1905.0552 | 1904.9963 | -0.0589 | -31 | 251 | 268 | ISSVQSVPALEIANAHR         | 25 | 61.877 |
| 2365.3337 | 2365.3594 | 0.0257  | 11  | 269 | 290 | KPLVIIAEDVDGEALSTLVNLR    |    |        |
| 2365.3337 | 2365.3594 | 0.0257  | 11  | 269 | 290 | KPLVIIAEDVDGEALSTLVNLR    | 24 | 56.929 |
| 2560.2485 | 2560.3247 | 0.0762  | 30  | 97  | 121 | LVQDVANNTNEEAGDGTTTATVLAR | 13 | 0      |
| 2560.2485 | 2560.3247 | 0.0762  | 30  | 97  | 121 | LVQDVANNTNEEAGDGTTTATVLAR |    |        |

| Protein Name                       | Accession No. | Peptide Count | Protein Score | Protein Score |                 | Total Ion Score | Total Ion C.I. % | Best Ion Score | Best Ion C.I. % | % Coverage |
|------------------------------------|---------------|---------------|---------------|---------------|-----------------|-----------------|------------------|----------------|-----------------|------------|
|                                    |               |               |               | C.I. %        | Total Ion Score |                 |                  |                |                 |            |
| Actin, cytoplasmic 2 (Gamma-actin) | spt P63259    | 7             | 172           | 100           | 124             | 100             | 60               | 99.991         | 22.8            |            |

| Peptide Information |             |         |       |            |          |                    |           |         |              |  |
|---------------------|-------------|---------|-------|------------|----------|--------------------|-----------|---------|--------------|--|
| Calc. Mass          | Obsrv. Mass | ± da    | ± ppm | Start Seq. | End Seq. | Sequence           | Ion Score | C. I. % | Modification |  |
| 800.5352            | 800.5128    | -0.0224 | -28   | 62         | 68       | RGILTLK            |           |         |              |  |
| 976.4482            | 976.4453    | -0.0029 | -3    | 19         | 28       | AGFAGDDAPR         | 31        | 92.938  |              |  |
| 976.4482            | 976.4453    | -0.0029 | -3    | 19         | 28       | AGFAGDDAPR         |           |         |              |  |
| 1132.527            | 1132.5364   | 0.0094  | 8     | 197        | 206      | GYSFTTTAER         |           |         |              |  |
| 1132.527            | 1132.5364   | 0.0094  | 8     | 197        | 206      | GYSFTTTAER         |           |         |              |  |
| 1198.7054           | 1198.6938   | -0.0116 | -10   | 29         | 39       | AVFPSIVGRPR        | 8         | 0       |              |  |
| 1198.7054           | 1198.6938   | -0.0116 | -10   | 29         | 39       | AVFPSIVGRPR        |           |         |              |  |
| 1516.7026           | 1516.7084   | 0.0058  | 4     | 360        | 372      | QEYDESGPSIVHR      | 32        | 93.835  |              |  |
| 1516.7026           | 1516.7084   | 0.0058  | 4     | 360        | 372      | QEYDESGPSIVHR      | 60        | 99.991  |              |  |
| 1516.7026           | 1516.7084   | 0.0058  | 4     | 360        | 372      | QEYDESGPSIVHR      |           |         |              |  |
| 1790.8918           | 1790.8939   | 0.0021  | 1     | 239        | 254      | SYELPDGQVITIGNER   | 23        | 53.344  |              |  |
| 1790.8918           | 1790.8939   | 0.0021  | 1     | 239        | 254      | SYELPDGQVITIGNER   |           |         |              |  |
| 1790.8918           | 1790.8939   | 0.0021  | 1     | 239        | 254      | SYELPDGQVITIGNER   | 25        | 69.246  |              |  |
| 1954.0643           | 1954.0709   | 0.0066  | 3     | 96         | 113      | VAPEEHPVLLTEAPLNPK |           |         |              |  |
| 1954.0643           | 1954.0709   | 0.0066  | 3     | 96         | 113      | VAPEEHPVLLTEAPLNPK |           |         |              |  |

| Protein Name                              | Accession No. | Peptide Count | Protein Score | Protein Score |                 | Total Ion Score | Total Ion C.I. % | Best Ion Score | Best Ion C.I. % | % Coverage |
|-------------------------------------------|---------------|---------------|---------------|---------------|-----------------|-----------------|------------------|----------------|-----------------|------------|
|                                           |               |               |               | C.I. %        | Total Ion Score |                 |                  |                |                 |            |
| CNDP dipeptidase 2 (metallopeptidase M20) | gij 58219062  | 5             | 67            | 99.582        | 24              | 89.355          | 24               | 89.355         | 16.0            |            |

| Peptide Information |             |         |       |            |          |                        |           |         |              |  |
|---------------------|-------------|---------|-------|------------|----------|------------------------|-----------|---------|--------------|--|
| Calc. Mass          | Obsrv. Mass | ± da    | ± ppm | Start Seq. | End Seq. | Sequence               | Ion Score | C. I. % | Modification |  |
| 1126.6215           | 1126.6255   | 0.004   | 4     | 150        | 159      | TGQEIPVNLNLR           |           |         |              |  |
| 1126.6215           | 1126.6255   | 0.004   | 4     | 150        | 159      | TGQEIPVNLNLR           |           |         |              |  |
| 1233.6473           | 1233.6448   | -0.0025 | -2    | 403        | 413      | TVFGVEPDLTR            |           |         |              |  |
| 1497.6968           | 1497.6833   | -0.0135 | -9    | 6          | 17       | AVFQYIDENQDR           | 24        | 89.355  |              |  |
| 1497.6968           | 1497.6833   | -0.0135 | -9    | 6          | 17       | AVFQYIDENQDR           |           |         |              |  |
| 1877.9392           | 1877.9293   | -0.0099 | -5    | 311        | 329      | YPSLSLHGIEGAFSGSGAK    |           |         |              |  |
| 2723.4324           | 2723.314    | -0.1184 | -43   | 340        | 363      | FSIRLVPDMIEVSEQVSSYLSK |           |         |              |  |

| Protein Name     | Accession No. | Peptide Count | Protein Score | Protein Score |                 | Total Ion Score | Total Ion C.I. % | Best Ion Score | Best Ion C.I. % | % Coverage |
|------------------|---------------|---------------|---------------|---------------|-----------------|-----------------|------------------|----------------|-----------------|------------|
|                  |               |               |               | C.I. %        | Total Ion Score |                 |                  |                |                 |            |
| Enolase 2, gamma | gij 26023949  | 4             | 72            | 99.862        | 38              | 98.547          | 31               | 91.183         | 10.4            |            |

| Peptide Information |             |         |       |            |          |                    |           |         |              |  |
|---------------------|-------------|---------|-------|------------|----------|--------------------|-----------|---------|--------------|--|
| Calc. Mass          | Obsrv. Mass | ± da    | ± ppm | Start Seq. | End Seq. | Sequence           | Ion Score | C. I. % | Modification |  |
| 848.4161            | 848.4565    | 0.0404  | 48    | 423        | 429      | FAGHNFR            |           |         |              |  |
| 848.4161            | 848.4565    | 0.0404  | 48    | 423        | 429      | FAGHNFR            |           |         |              |  |
| 848.4161            | 848.4565    | 0.0404  | 48    | 423        | 429      | FAGHNFR            |           |         |              |  |
| 1130.6204           | 1130.5824   | -0.038  | -34   | 184        | 193      | LGAEVYHTLK         |           |         |              |  |
| 1174.5586           | 1174.5294   | -0.0292 | -25   | 413        | 422      | IEEELGEEAR         |           |         |              |  |
| 1174.5586           | 1174.5294   | -0.0292 | -25   | 413        | 422      | IEEELGEEAR         | 8         | 0       |              |  |
| 1174.5586           | 1174.5294   | -0.0292 | -25   | 413        | 422      | IEEELGEEAR         | 5         | 0       |              |  |
| 1804.9438           | 1804.8735   | -0.0703 | -39   | 33         | 50       | AAVPSGASTGIYEALRLR |           |         |              |  |
| 1804.9438           | 1804.8735   | -0.0703 | -39   | 33         | 50       | AAVPSGASTGIYEALRLR | 27        | 80.079  |              |  |
| 1804.9438           | 1804.8735   | -0.0703 | -39   | 33         | 50       | AAVPSGASTGIYEALRLR | 31        | 91.183  |              |  |



| Protein Name                       | Accession No. | Peptide Count | Protein Score | Protein Score C.I.% | Total Ion Score | Total Ion C.I. %   | Best Ion Score | Best Ion C.I.% | % Coverage   |      |
|------------------------------------|---------------|---------------|---------------|---------------------|-----------------|--------------------|----------------|----------------|--------------|------|
| Actin, cytoplasmic 2 (Gamma-actin) | spt P63259    | 7             | 360           | 100                 | 300             |                    | 100            | 102            | 100          | 22.8 |
| Peptide Information                |               |               |               |                     |                 |                    |                |                |              |      |
| Calc. Mass                         | Obsrv. Mass   | ± da          | ± ppm         | Start Seq.          | End Seq.        | Sequence           | Ion Score      | C. I. %        | Modification |      |
| 800.5352                           | 800.52        | -0.0152       | -19           | 62                  | 68              | RGILTLK            |                |                |              |      |
| 800.5352                           | 800.52        | -0.0152       | -19           | 62                  | 68              | RGILTLK            |                |                |              |      |
| 800.5352                           | 800.52        | -0.0152       | -19           | 62                  | 68              | RGILTLK            |                |                |              |      |
| 976.4482                           | 976.4386      | -0.0096       | -10           | 19                  | 28              | AGFAGDDAPR         |                |                |              |      |
| 976.4482                           | 976.4386      | -0.0096       | -10           | 19                  | 28              | AGFAGDDAPR         | 50             | 99.938         |              |      |
| 1132.527                           | 1132.5182     | -0.0088       | -8            | 197                 | 206             | GYSFTTTAER         | 43             | 99.698         |              |      |
| 1132.527                           | 1132.5182     | -0.0088       | -8            | 197                 | 206             | GYSFTTTAER         |                |                |              |      |
| 1132.527                           | 1132.5182     | -0.0088       | -8            | 197                 | 206             | GYSFTTTAER         | 48             | 99.903         |              |      |
| 1515.7491                          | 1515.73       | -0.0191       | -13           | 85                  | 95              | IWHHTFYNELR        |                |                |              |      |
| 1515.7491                          | 1515.73       | -0.0191       | -13           | 85                  | 95              | IWHHTFYNELR        |                |                |              |      |
| 1516.7026                          | 1516.6971     | -0.0055       | -4            | 360                 | 372             | QEYDESGPSIVHR      | 89             | 100            |              |      |
| 1516.7026                          | 1516.6971     | -0.0055       | -4            | 360                 | 372             | QEYDESGPSIVHR      | 93             | 100            |              |      |
| 1516.7026                          | 1516.6971     | -0.0055       | -4            | 360                 | 372             | QEYDESGPSIVHR      |                |                |              |      |
| 1790.8918                          | 1790.8815     | -0.0103       | -6            | 239                 | 254             | SYELPDGQVITIGNER   | 80             | 100            |              |      |
| 1790.8918                          | 1790.8815     | -0.0103       | -6            | 239                 | 254             | SYELPDGQVITIGNER   | 102            | 100            |              |      |
| 1790.8918                          | 1790.8815     | -0.0103       | -6            | 239                 | 254             | SYELPDGQVITIGNER   |                |                |              |      |
| 1954.0643                          | 1954.0592     | -0.0051       | -3            | 96                  | 113             | VAPEEHPVLLTEAPLNPK | 7              | 0              |              |      |
| 1954.0643                          | 1954.0592     | -0.0051       | -3            | 96                  | 113             | VAPEEHPVLLTEAPLNPK |                |                |              |      |

| Protein Name                       | Accession No. | Peptide Count | Protein Score | Protein Score C.I.% | Total Ion Score | Total Ion C.I. %   | Best Ion Score | Best Ion C.I.% | % Coverage   |      |
|------------------------------------|---------------|---------------|---------------|---------------------|-----------------|--------------------|----------------|----------------|--------------|------|
| Actin, cytoplasmic 2 (Gamma-actin) | spt P63259    | 7             | 336           | 100                 | 263             |                    | 100            | 100            | 100          | 23.9 |
| Peptide Information                |               |               |               |                     |                 |                    |                |                |              |      |
| Calc. Mass                         | Obsrv. Mass   | ± da          | ± ppm         | Start Seq.          | End Seq.        | Sequence           | Ion Score      | C. I. %        | Modification |      |
| 976.4482                           | 976.4605      | 0.0123        | 13            | 19                  | 28              | AGFAGDDAPR         | 40             | 99.098         |              |      |
| 976.4482                           | 976.4605      | 0.0123        | 13            | 19                  | 28              | AGFAGDDAPR         | 39             | 98.945         |              |      |
| 976.4482                           | 976.4605      | 0.0123        | 13            | 19                  | 28              | AGFAGDDAPR         |                |                |              |      |
| 1132.527                           | 1132.5128     | -0.0142       | -13           | 197                 | 206             | GYSFTTTAER         |                |                |              |      |
| 1132.527                           | 1132.5128     | -0.0142       | -13           | 197                 | 206             | GYSFTTTAER         | 17             | 0              |              |      |
| 1198.7054                          | 1198.6809     | -0.0245       | -20           | 29                  | 39              | AVFPSIVGRPR        | 26             | 76.109         |              |      |
| 1198.7054                          | 1198.6809     | -0.0245       | -20           | 29                  | 39              | AVFPSIVGRPR        | 29             | 88.67          |              |      |
| 1198.7054                          | 1198.6809     | -0.0245       | -20           | 29                  | 39              | AVFPSIVGRPR        |                |                |              |      |
| 1515.7491                          | 1515.692      | -0.0571       | -38           | 85                  | 95              | IWHHTFYNELR        |                |                |              |      |
| 1515.7491                          | 1515.692      | -0.0571       | -38           | 85                  | 95              | IWHHTFYNELR        |                |                |              |      |
| 1516.7026                          | 1516.656      | -0.0466       | -31           | 360                 | 372             | QEYDESGPSIVHR      | 60             | 99.991         |              |      |
| 1516.7026                          | 1516.656      | -0.0466       | -31           | 360                 | 372             | QEYDESGPSIVHR      | 100            | 100            |              |      |
| 1516.7026                          | 1516.656      | -0.0466       | -31           | 360                 | 372             | QEYDESGPSIVHR      |                |                |              |      |
| 1790.8918                          | 1790.8427     | -0.0491       | -27           | 239                 | 254             | SYELPDGQVITIGNER   |                |                |              |      |
| 1790.8918                          | 1790.8427     | -0.0491       | -27           | 239                 | 254             | SYELPDGQVITIGNER   | 70             | 100            |              |      |
| 1790.8918                          | 1790.8427     | -0.0491       | -27           | 239                 | 254             | SYELPDGQVITIGNER   | 54             | 99.965         |              |      |
| 1954.0643                          | 1954.0317     | -0.0326       | -17           | 96                  | 113             | VAPEEHPVLLTEAPLNPK | 8              | 0              |              |      |
| 1954.0643                          | 1954.0317     | -0.0326       | -17           | 96                  | 113             | VAPEEHPVLLTEAPLNPK |                |                |              |      |

| Protein Name                      | Accession No. | Peptide Count | Protein Score | Protein Score C.I.% | Total Ion Score | Total Ion C.I. % | Best Ion Score | Best Ion C.I.% | % Coverage   |      |
|-----------------------------------|---------------|---------------|---------------|---------------------|-----------------|------------------|----------------|----------------|--------------|------|
| Heat shock protein 1 (chaperonin) | gil 11560024  | 9             | 254           | 100                 | 190             |                  | 100            | 58             | 99.983       | 21.6 |
| Peptide Information               |               |               |               |                     |                 |                  |                |                |              |      |
| Calc. Mass                        | Obsrv. Mass   | ± da          | ± ppm         | Start Seq.          | End Seq.        | Sequence         | Ion Score      | C. I. %        | Modification |      |
| 833.39                            | 833.3827      | -0.0073       | -9            | 302                 | 309             | APGFGDNR         | 15             | 0              |              |      |
| 833.39                            | 833.3827      | -0.0073       | -9            | 302                 | 309             | APGFGDNR         | 15             | 0              |              |      |
| 833.39                            | 833.3827      | -0.0073       | -9            | 302                 | 309             | APGFGDNR         |                |                |              |      |
| 855.4682                          | 855.4647      | -0.0035       | -4            | 134                 | 141             | GANPVEIR         |                |                |              |      |
| 855.4682                          | 855.4647      | -0.0035       | -4            | 134                 | 141             | GANPVEIR         | 20             | 2.968          |              |      |

|           |           |         |    |     |     |                        |    |        |  |  |  |
|-----------|-----------|---------|----|-----|-----|------------------------|----|--------|--|--|--|
| 960.5109  | 960.5073  | -0.0036 | -4 | 421 | 429 | VTDALNATR              |    |        |  |  |  |
| 960.5109  | 960.5073  | -0.0036 | -4 | 421 | 429 | VTDALNATR              | 13 | 0      |  |  |  |
| 961.4849  | 961.4968  | 0.0119  | 12 | 302 | 310 | APGFGDNRRK             |    |        |  |  |  |
| 961.4849  | 961.4968  | 0.0119  | 12 | 302 | 310 | APGFGDNRRK             |    |        |  |  |  |
| 1905.0552 | 1905.0482 | -0.007  | -4 | 251 | 268 | ISSVQSI VPALEIANAHR    | 58 | 99.983 |  |  |  |
| 1905.0552 | 1905.0482 | -0.007  | -4 | 251 | 268 | ISSVQSI VPALEIANAHR    |    |        |  |  |  |
| 1905.0552 | 1905.0482 | -0.007  | -4 | 251 | 268 | ISSVQSI VPALEIANAHR    | 53 | 99.95  |  |  |  |
| 1922.9528 | 1922.9435 | -0.0093 | -5 | 206 | 221 | TLNDELEIIEGMKFDR       |    |        |  |  |  |
| 2040.002  | 2040.0193 | 0.0173  | 8  | 371 | 387 | IQEITEQLDITSEYEK       |    |        |  |  |  |
| 2365.3337 | 2365.3228 | -0.0109 | -5 | 269 | 290 | KPLVIIAEDVDGEALSTLVNLR |    |        |  |  |  |
| 2365.3337 | 2365.3228 | -0.0109 | -5 | 269 | 290 | KPLVIIAEDVDGEALSTLVNLR | 30 | 89.287 |  |  |  |
| 2560.2485 | 2560.2317 | -0.0168 | -7 | 97  | 121 | LVQDVANNTNEEAGDGTATVLR | 39 | 98.617 |  |  |  |
| 2560.2485 | 2560.2317 | -0.0168 | -7 | 97  | 121 | LVQDVANNTNEEAGDGTATVLR |    |        |  |  |  |
| 2560.2485 | 2560.2317 | -0.0168 | -7 | 97  | 121 | LVQDVANNTNEEAGDGTATVLR | 54 | 99.96  |  |  |  |

| Protein Name           |  | Accession No. | Peptide Count | Protein Score | Protein Score |     | Total Ion Score | Total Ion C.I. % | Best Ion Score | Best Ion C.I.% | % Coverage |      |
|------------------------|--|---------------|---------------|---------------|---------------|-----|-----------------|------------------|----------------|----------------|------------|------|
| Annexin A3 (Annexin-3) |  | gi 122065130  | 10            | 201           | C.I.%         | 100 | 66              |                  | 99.998         | 35             | 97.59      | 33.3 |

| Peptide Information |             |         |       |            |          |                      |           |         |              |  |  |
|---------------------|-------------|---------|-------|------------|----------|----------------------|-----------|---------|--------------|--|--|
| Calc. Mass          | Obsrv. Mass | ± da    | ± ppm | Start Seq. | End Seq. | Sequence             | Ion Score | C. I. % | Modification |  |  |
| 943.4519            | 943.4833    | 0.0314  | 33    | 212        | 218      | LTFDEYR              | 19        | 6.653   |              |  |  |
| 943.4519            | 943.4833    | 0.0314  | 33    | 212        | 218      | LTFDEYR              | 22        | 48.82   |              |  |  |
| 943.4519            | 943.4833    | 0.0314  | 33    | 212        | 218      | LTFDEYR              |           |         |              |  |  |
| 986.5629            | 986.5803    | 0.0174  | 18    | 156        | 165      | ALLTLADGGR           |           |         |              |  |  |
| 1073.5837           | 1073.6167   | 0.033   | 31    | 281        | 289      | SEIDLLDIR            |           |         |              |  |  |
| 1180.5593           | 1180.5782   | 0.0189  | 16    | 265        | 275      | GAGTDEFTLNR          |           |         |              |  |  |
| 1180.5593           | 1180.5782   | 0.0189  | 16    | 265        | 275      | GAGTDEFTLNR          | 10        | 0       |              |  |  |
| 1180.5593           | 1180.5782   | 0.0189  | 16    | 265        | 275      | GAGTDEFTLNR          |           |         |              |  |  |
| 1558.8435           | 1558.8423   | -0.0012 | -1    | 156        | 170      | ALLTLADGGRDESLK      |           |         |              |  |  |
| 1636.9281           | 1636.9302   | 0.0021  | 1     | 250        | 264      | NTPAFLAGRLHQALK      |           |         |              |  |  |
| 1636.9281           | 1636.9302   | 0.0021  | 1     | 250        | 264      | NTPAFLAGRLHQALK      |           |         |              |  |  |
| 1636.9281           | 1636.9302   | 0.0021  | 1     | 250        | 264      | NTPAFLAGRLHQALK      |           |         |              |  |  |
| 1711.7882           | 1711.7799   | -0.0083 | -5    | 140        | 154      | NLRDDISSETSGDFR      |           |         |              |  |  |
| 1754.9435           | 1754.9231   | -0.0204 | -12   | 231        | 246      | GELSGHFEDLLAVVR      |           |         |              |  |  |
| 2034.9879           | 2034.9795   | -0.0084 | -4    | 11         | 29       | GTINNYPGFNPSVDAEAIR  |           |         |              |  |  |
| 2034.9879           | 2034.9795   | -0.0084 | -4    | 11         | 29       | GTINNYPGFNPSVDAEAIR  | 35        | 97.59   |              |  |  |
| 2034.9879           | 2034.9795   | -0.0084 | -4    | 11         | 29       | GTINNYPGFNPSVDAEAIR  | 25        | 77.762  |              |  |  |
| 2163.0828           | 2163.061    | -0.0218 | -10   | 11         | 30       | GTINNYPGFNPSVDAEAIRK |           |         |              |  |  |

| Protein Name                            |  | Accession No. | Peptide Count | Protein Score | Protein Score |     | Total Ion Score | Total Ion C.I. % | Best Ion Score | Best Ion C.I.% | % Coverage |      |
|-----------------------------------------|--|---------------|---------------|---------------|---------------|-----|-----------------|------------------|----------------|----------------|------------|------|
| F-actin capping protein subunit alpha-2 |  | spt P28497    | 4             | 110           | C.I.%         | 100 | 63              |                  | 99.997         | 33             | 97.284     | 22.4 |

| Peptide Information |             |         |       |            |          |                    |           |         |              |  |  |
|---------------------|-------------|---------|-------|------------|----------|--------------------|-----------|---------|--------------|--|--|
| Calc. Mass          | Obsrv. Mass | ± da    | ± ppm | Start Seq. | End Seq. | Sequence           | Ion Score | C. I. % | Modification |  |  |
| 1197.6949           | 1197.6615   | -0.0334 | -28   | 38         | 47       | LLLNNDNLLR         |           |         |              |  |  |
| 1197.6949           | 1197.6615   | -0.0334 | -28   | 38         | 47       | LLLNNDNLLR         | 33        | 97.284  |              |  |  |
| 2029.0138           | 2028.9746   | -0.0392 | -19   | 194        | 210      | IQVHYEDGNVQLVSHK   |           |         |              |  |  |
| 2029.0138           | 2028.9746   | -0.0392 | -19   | 194        | 210      | IQVHYEDGNVQLVSHK   |           |         |              |  |  |
| 2101.05             | 2101.02     | -0.03   | -14   | 20         | 37       | FIIHAPPGEFNEVFNDVR | 30        | 94.63   |              |  |  |
| 2101.05             | 2101.02     | -0.03   | -14   | 20         | 37       | FIIHAPPGEFNEVFNDVR | 23        | 72.205  |              |  |  |
| 2101.05             | 2101.02     | -0.03   | -14   | 20         | 37       | FIIHAPPGEFNEVFNDVR |           |         |              |  |  |
| 2107.0244           | 2107.0078   | -0.0166 | -8    | 48         | 66       | EGAAHAFQYNDLQFTPVK |           |         |              |  |  |

| Protein Name                             |  | Accession No.  | Peptide Count | Protein Score | Protein Score |        | Total Ion Score | Total Ion C.I. % | Best Ion Score | Best Ion C.I.% | % Coverage |      |
|------------------------------------------|--|----------------|---------------|---------------|---------------|--------|-----------------|------------------|----------------|----------------|------------|------|
| Tyrosine 3-monooxygenase/tryptophan 5-mo |  | rf NP_062250.1 | 3             | 64            | C.I.%         | 99.147 | 40              |                  | 98.767         | 40             | 98.767     | 26.0 |

| Peptide Information |             |      |       |            |          |          |           |         |              |  |  |
|---------------------|-------------|------|-------|------------|----------|----------|-----------|---------|--------------|--|--|
| Calc. Mass          | Obsrv. Mass | ± da | ± ppm | Start Seq. | End Seq. | Sequence | Ion Score | C. I. % | Modification |  |  |

|           |           |         |     |     |     |                     |    |        |  |  |
|-----------|-----------|---------|-----|-----|-----|---------------------|----|--------|--|--|
| 1359.7267 | 1359.6882 | -0.0385 | -28 | 106 | 117 | YLILNATHAESK        |    |        |  |  |
| 1598.7405 | 1598.6853 | -0.0552 | -35 | 30  | 43  | AVTEQGHELNEER       |    |        |  |  |
| 1598.7405 | 1598.6853 | -0.0552 | -35 | 30  | 43  | AVTEQGHELNEER       | 20 | 0      |  |  |
| 1598.7405 | 1598.6853 | -0.0552 | -35 | 30  | 43  | AVTEQGHELNEER       | 40 | 98.767 |  |  |
| 2159.0251 | 2159.021  | -0.0041 | -2  | 141 | 159 | QTTVSNSQQAYQEAFEISK |    |        |  |  |

| Protein Name                              | Accession No. | Peptide Count | Protein Score | Protein Score C.I.% | Total Ion Score | Total Ion C.I. % | Best Ion Score | Best Ion C.I.% | % Coverage |     |
|-------------------------------------------|---------------|---------------|---------------|---------------------|-----------------|------------------|----------------|----------------|------------|-----|
| Dimethylarginine dimethylaminohydrolase 2 | gi 47087079   | 3             | 80            | 99.983              | 55              |                  | 99.969         | 23             | 57.719     | 9.1 |

| Peptide Information | Calc. Mass | Obsrv. Mass | ± da    | ± ppm | Start Seq. | End Seq. | Sequence   | Ion Score | C. I. % | Modification |
|---------------------|------------|-------------|---------|-------|------------|----------|------------|-----------|---------|--------------|
|                     | 885.5152   | 885.5345    | 0.0193  | 22    | 106        | 113      | ALQDLGLR   |           |         |              |
|                     | 885.5152   | 885.5345    | 0.0193  | 22    | 106        | 113      | ALQDLGLR   | 14        | 0       |              |
|                     | 885.5152   | 885.5345    | 0.0193  | 22    | 106        | 113      | ALQDLGLR   | 14        | 0       |              |
|                     | 927.5006   | 927.5251    | 0.0245  | 26    | 97         | 104      | RPEVDGVR   | 23        | 57.719  |              |
|                     | 927.5006   | 927.5251    | 0.0245  | 26    | 97         | 104      | RPEVDGVR   |           |         |              |
|                     | 1078.5527  | 1078.5383   | -0.0144 | -13   | 148        | 157      | GAEIVADTFR | 17        | 0       |              |
|                     | 1078.5527  | 1078.5383   | -0.0144 | -13   | 148        | 157      | GAEIVADTFR |           |         |              |
|                     | 1078.5527  | 1078.5383   | -0.0144 | -13   | 148        | 157      | GAEIVADTFR | 15        | 0       |              |

| Protein Name          | Accession No. | Peptide Count | Protein Score | Protein Score C.I.% | Total Ion Score | Total Ion C.I. % | Best Ion Score | Best Ion C.I.% | % Coverage |     |
|-----------------------|---------------|---------------|---------------|---------------------|-----------------|------------------|----------------|----------------|------------|-----|
| Tubulin beta-2A chain | spt Q13885    | 4             | 111           | 100                 | 90              |                  | 100            | 60             | 99.989     | 8.8 |

| Peptide Information | Calc. Mass | Obsrv. Mass | ± da    | ± ppm | Start Seq. | End Seq. | Sequence     | Ion Score | C. I. % | Modification |
|---------------------|------------|-------------|---------|-------|------------|----------|--------------|-----------|---------|--------------|
|                     | 1053.6091  | 1053.6299   | 0.0208  | 20    | 310        | 318      | YLTVAAIIFR   |           |         |              |
|                     | 1053.6091  | 1053.6299   | 0.0208  | 20    | 310        | 318      | YLTVAAIIFR   |           |         |              |
|                     | 1077.5323  | 1077.5485   | 0.0162  | 15    | 155        | 162      | IREEYPDR     | 30        | 86.841  |              |
|                     | 1077.5323  | 1077.5485   | 0.0162  | 15    | 155        | 162      | IREEYPDR     |           |         |              |
|                     | 1130.5953  | 1130.611    | 0.0157  | 14    | 242        | 251      | FPGQLNADLR   | 58        | 99.981  |              |
|                     | 1130.5953  | 1130.611    | 0.0157  | 14    | 242        | 251      | FPGQLNADLR   | 60        | 99.989  |              |
|                     | 1130.5953  | 1130.611    | 0.0157  | 14    | 242        | 251      | FPGQLNADLR   |           |         |              |
|                     | 1355.6589  | 1355.6584   | -0.0005 | 0     | 47         | 58       | INVYYNEAAGNK |           |         |              |

| Protein Name                                   | Accession No. | Peptide Count | Protein Score | Protein Score C.I.% | Total Ion Score | Total Ion C.I. % | Best Ion Score | Best Ion C.I.% | % Coverage |      |
|------------------------------------------------|---------------|---------------|---------------|---------------------|-----------------|------------------|----------------|----------------|------------|------|
| Protein phosphatase 2, catalytic subunit, beta | gi 4758952    | 6             | 104           | 100                 | 58              |                  | 99.986         | 25             | 75.731     | 14.3 |

| Peptide Information | Calc. Mass | Obsrv. Mass | ± da   | ± ppm | Start Seq. | End Seq. | Sequence    | Ion Score | C. I. % | Modification |
|---------------------|------------|-------------|--------|-------|------------|----------|-------------|-----------|---------|--------------|
|                     | 911.4621   | 911.4962    | 0.0341 | 37    | 303        | 309      | RTPDYFL     | 10        | 0       |              |
|                     | 911.4621   | 911.4962    | 0.0341 | 37    | 303        | 309      | RTPDYFL     |           |         |              |
|                     | 951.5118   | 951.5408    | 0.029  | 30    | 295        | 302      | RGEPHVTR    | 20        | 21.105  |              |
|                     | 951.5118   | 951.5408    | 0.029  | 30    | 295        | 302      | RGEPHVTR    | 23        | 65.002  |              |
|                     | 951.5118   | 951.5408    | 0.029  | 30    | 296        | 303      | GEPHVTRR    |           |         |              |
|                     | 960.4744   | 960.5056    | 0.0312 | 32    | 42         | 49       | ESNVQEVN    |           |         |              |
|                     | 1000.517   | 1000.548    | 0.031  | 31    | 22         | 29       | QLNENQVR    | 0         | 0       |              |
|                     | 1000.517   | 1000.548    | 0.031  | 31    | 22         | 29       | QLNENQVR    |           |         |              |
|                     | 1340.6633  | 1340.6693   | 0.006  | 4     | 284        | 294      | YSFLQFDPAPR | 25        | 75.731  |              |
|                     | 1340.6633  | 1340.6693   | 0.006  | 4     | 284        | 294      | YSFLQFDPAPR | 23        | 61.977  |              |
|                     | 1340.6633  | 1340.6693   | 0.006  | 4     | 284        | 294      | YSFLQFDPAPR |           |         |              |

| Protein Name               | Accession No. | Peptide Count | Protein Score | Protein Score C.I.% | Total Ion Score | Total Ion C.I. % | Best Ion Score | Best Ion C.I.% | % Coverage |      |
|----------------------------|---------------|---------------|---------------|---------------------|-----------------|------------------|----------------|----------------|------------|------|
| NSFL1 (p97) cofactor (p47) | gi 14010837   | 9             | 150           | 100                 | 41              |                  | 99.443         | 26             | 82.141     | 32.2 |

| Peptide Information | Calc. Mass | Obsrv. Mass | ± da   | ± ppm | Start Seq. | End Seq. | Sequence | Ion Score | C. I. % | Modification |
|---------------------|------------|-------------|--------|-------|------------|----------|----------|-----------|---------|--------------|
|                     | 886.4053   | 886.4368    | 0.0315 | 36    | 94         | 101      | FYAGGSER |           |         |              |
|                     | 886.4053   | 886.4368    | 0.0315 | 36    | 94         | 101      | FYAGGSER |           |         |              |

|           |           |         |     |     |     |                     |    |        |  |
|-----------|-----------|---------|-----|-----|-----|---------------------|----|--------|--|
| 1026.5691 | 1026.5791 | 0.01    | 10  | 216 | 224 | GEVPAELRR           |    |        |  |
| 1038.5691 | 1038.5696 | 0.0005  | 0   | 102 | 111 | SGQQIVGPPR          |    |        |  |
| 1038.5691 | 1038.5696 | 0.0005  | 0   | 102 | 111 | SGQQIVGPPR          |    |        |  |
| 1038.5691 | 1038.5696 | 0.0005  | 0   | 102 | 111 | SGQQIVGPPR          |    |        |  |
| 1322.6222 | 1322.6255 | 0.0033  | 2   | 11  | 22  | EFVAVTGAEEDR        |    |        |  |
| 1339.7692 | 1339.7192 | -0.05   | -37 | 357 | 368 | EANLLNAVIVQR        |    |        |  |
| 1339.7692 | 1339.7192 | -0.05   | -37 | 357 | 368 | EANLLNAVIVQR        |    |        |  |
| 1339.7692 | 1339.7192 | -0.05   | -37 | 357 | 368 | EANLLNAVIVQR        |    |        |  |
| 1648.7812 | 1648.7145 | -0.0667 | -40 | 157 | 172 | LGAAPPEESAYVAGER    |    |        |  |
| 1648.7812 | 1648.7145 | -0.0667 | -40 | 157 | 172 | LGAAPPEESAYVAGER    |    |        |  |
| 1648.7812 | 1648.7145 | -0.0667 | -40 | 157 | 172 | LGAAPPEESAYVAGER    |    |        |  |
| 1754.8344 | 1754.7698 | -0.0646 | -37 | 200 | 214 | SYQDPSNAQFLESIR     | 26 | 82.141 |  |
| 1754.8344 | 1754.7698 | -0.0646 | -37 | 200 | 214 | SYQDPSNAQFLESIR     |    |        |  |
| 2057.0874 | 2057.0469 | -0.0405 | -20 | 283 | 301 | ASSSILINEAEPTTNIQIR |    |        |  |
| 2057.0874 | 2057.0469 | -0.0405 | -20 | 283 | 301 | ASSSILINEAEPTTNIQIR | 15 | 0      |  |
| 2099.8635 | 2099.8328 | -0.0307 | -15 | 77  | 93  | DLIHDQDEEEEEEGQR    |    |        |  |

| Protein Name                      | Accession No. | Peptide Count | Protein Score | Protein Score |          | Total Ion Score | Total Ion C.I. % | Best Ion Score | Best Ion C.I. % | % Coverage |      |
|-----------------------------------|---------------|---------------|---------------|---------------|----------|-----------------|------------------|----------------|-----------------|------------|------|
|                                   |               |               |               | C.I. %        |          |                 |                  |                |                 |            |      |
| Heat shock protein 1 (chaperonin) | gil11560024   | 12            | 319           | 100           |          | 239             |                  | 100            | 49              | 99.86      | 17.0 |
| <b>Peptide Information</b>        |               |               |               |               |          |                 |                  |                |                 |            |      |
| Calc. Mass                        | Obsrv. Mass   | ± da          | ± ppm         | Start Seq.    | End Seq. | Sequence        | Ion Score        | C. I. %        | Modification    |            |      |
| 815.5137                          | 815.551       | 0.0373        | 46            | 340           | 346      | ALLFVPR         | 46               | 99.731         |                 |            |      |
| 815.5137                          | 815.551       | 0.0373        | 46            | 340           | 346      | ALLFVPR         | 39               | 98.558         |                 |            |      |
| 815.5137                          | 815.551       | 0.0373        | 46            | 340           | 346      | ALLFVPR         |                  |                |                 |            |      |
| 858.5406                          | 858.5474      | 0.0068        | 8             | 459           | 465      | KLSELLR         |                  |                |                 |            |      |
| 1108.5421                         | 1108.5658     | 0.0237        | 21            | 348           | 356      | APFDLFENR       |                  |                |                 |            |      |
| 1168.5706                         | 1168.5862     | 0.0156        | 13            | 448           | 457      | LGIHEDSQNR      | 21               | 4.037          |                 |            |      |
| 1168.5706                         | 1168.5862     | 0.0156        | 13            | 448           | 457      | LGIHEDSQNR      | 30               | 89.502         |                 |            |      |
| 1168.5706                         | 1168.5862     | 0.0156        | 13            | 448           | 457      | LGIHEDSQNR      |                  |                |                 |            |      |
| 1235.6014                         | 1235.6147     | 0.0133        | 11            | 501           | 511      | DQVANSFVER      | 20               | 0              |                 |            |      |
| 1235.6014                         | 1235.6147     | 0.0133        | 11            | 501           | 511      | DQVANSFVER      |                  |                |                 |            |      |
| 1249.5841                         | 1249.6287     | 0.0446        | 36            | 174           | 185      | TDTGPMGRGTK     |                  |                |                 |            |      |
| 1249.5841                         | 1249.6287     | 0.0446        | 36            | 174           | 185      | TDTGPMGRGTK     |                  |                |                 |            |      |
| 1264.6433                         | 1264.6559     | 0.0126        | 10            | 347           | 356      | RAPFDLFENR      |                  |                |                 |            |      |
| 1264.6433                         | 1264.6559     | 0.0126        | 10            | 347           | 356      | RAPFDLFENR      | 20               | 0              |                 |            |      |
| 1311.5699                         | 1311.5807     | 0.0108        | 8             | 192           | 201      | EDQTEYLEER      |                  |                |                 |            |      |
| 1311.5699                         | 1311.5807     | 0.0108        | 8             | 192           | 201      | EDQTEYLEER      | 32               | 92.395         |                 |            |      |
| 1348.6644                         | 1348.6703     | 0.0059        | 4             | 329           | 339      | HFSVEGQLEFR     |                  |                |                 |            |      |
| 1348.6644                         | 1348.6703     | 0.0059        | 4             | 329           | 339      | HFSVEGQLEFR     | 26               | 73.448         |                 |            |      |
| 1513.7856                         | 1513.7823     | -0.0033       | -2            | 388           | 401      | GVVDSDELPLNISR  | 32               | 92.771         |                 |            |      |
| 1513.7856                         | 1513.7823     | -0.0033       | -2            | 388           | 401      | GVVDSDELPLNISR  |                  |                |                 |            |      |
| 1513.7856                         | 1513.7823     | -0.0033       | -2            | 388           | 401      | GVVDSDELPLNISR  | 49               | 99.86          |                 |            |      |
| 1786.9446                         | 1786.9315     | -0.0131       | -7            | 634           | 648      | HLEINPDHSIETLR  |                  |                |                 |            |      |
| 1786.9446                         | 1786.9315     | -0.0131       | -7            | 634           | 648      | HLEINPDHSIETLR  | 16               | 0              |                 |            |      |
| 1786.9446                         | 1786.9315     | -0.0131       | -7            | 634           | 648      | HLEINPDHSIETLR  | 14               | 0              |                 |            |      |
| 1833.7814                         | 1833.7814     | 0             | 0             | 301           | 315      | NPDDITNEEYGEFYK |                  |                |                 |            |      |

| Protein Name                       | Accession No. | Peptide Count | Protein Score | Protein Score |          | Total Ion Score | Total Ion C.I. % | Best Ion Score | Best Ion C.I. % | % Coverage |      |
|------------------------------------|---------------|---------------|---------------|---------------|----------|-----------------|------------------|----------------|-----------------|------------|------|
|                                    |               |               |               | C.I. %        |          |                 |                  |                |                 |            |      |
| Actin, cytoplasmic 2 (Gamma-actin) | sptjP63259    | 6             | 187           | 100           |          | 129             |                  | 100            | 48              | 99.845     | 21.0 |
| <b>Peptide Information</b>         |               |               |               |               |          |                 |                  |                |                 |            |      |
| Calc. Mass                         | Obsrv. Mass   | ± da          | ± ppm         | Start Seq.    | End Seq. | Sequence        | Ion Score        | C. I. %        | Modification    |            |      |
| 976.4482                           | 976.4778      | 0.0296        | 30            | 19            | 28       | AGFAGDDAPR      |                  |                |                 |            |      |
| 976.4482                           | 976.4778      | 0.0296        | 30            | 19            | 28       | AGFAGDDAPR      | 35               | 96.654         |                 |            |      |
| 1132.527                           | 1132.5446     | 0.0176        | 16            | 197           | 206      | GYSFTTTAER      |                  |                |                 |            |      |
| 1132.527                           | 1132.5446     | 0.0176        | 16            | 197           | 206      | GYSFTTTAER      |                  |                |                 |            |      |
| 1132.527                           | 1132.5446     | 0.0176        | 16            | 197           | 206      | GYSFTTTAER      |                  |                |                 |            |      |

|           |           |         |    |     |     |                    |    |        |  |  |
|-----------|-----------|---------|----|-----|-----|--------------------|----|--------|--|--|
| 1198.7054 | 1198.7142 | 0.0088  | 7  | 29  | 39  | AVFPSIVGRPR        |    |        |  |  |
| 1198.7054 | 1198.7142 | 0.0088  | 7  | 29  | 39  | AVFPSIVGRPR        | 10 | 0      |  |  |
| 1516.7026 | 1516.696  | -0.0066 | -4 | 360 | 372 | QEYDESGPSIVHR      | 48 | 99.845 |  |  |
| 1516.7026 | 1516.696  | -0.0066 | -4 | 360 | 372 | QEYDESGPSIVHR      | 19 | 0      |  |  |
| 1516.7026 | 1516.696  | -0.0066 | -4 | 360 | 372 | QEYDESGPSIVHR      |    |        |  |  |
| 1790.8918 | 1790.8795 | -0.0123 | -7 | 239 | 254 | SYELPDGGQVITIGNER  |    |        |  |  |
| 1790.8918 | 1790.8795 | -0.0123 | -7 | 239 | 254 | SYELPDGGQVITIGNER  | 36 | 97.133 |  |  |
| 1790.8918 | 1790.8795 | -0.0123 | -7 | 239 | 254 | SYELPDGGQVITIGNER  | 26 | 75.027 |  |  |
| 1954.0643 | 1954.0497 | -0.0146 | -7 | 96  | 113 | VAPEEHPVLLTEAPLNPK |    |        |  |  |
| 1954.0643 | 1954.0497 | -0.0146 | -7 | 96  | 113 | VAPEEHPVLLTEAPLNPK |    |        |  |  |

| Protein Name               | Accession No. | Peptide Count | Protein Score | Protein Score |          | Total Ion Score      | Total Ion C.I. % | Best Ion Score | Best Ion C.I. % | % Coverage |      |
|----------------------------|---------------|---------------|---------------|---------------|----------|----------------------|------------------|----------------|-----------------|------------|------|
|                            |               |               |               | C.I. %        |          |                      |                  |                |                 |            |      |
| Tubulin alpha              | gi 223556     | 7             | 127           | 100           |          | 68                   |                  | 99.998         | 51              | 99.9       | 23.8 |
| <b>Peptide Information</b> |               |               |               |               |          |                      |                  |                |                 |            |      |
| Calc. Mass                 | Obsrv. Mass   | ± da          | ± ppm         | Start Seq.    | End Seq. | Sequence             | Ion Score        | C. I. %        | Modification    |            |      |
| 1023.449                   | 1023.4636     | 0.0146        | 14            | 97            | 105      | EDAANNYAR            |                  |                |                 |            |      |
| 1023.449                   | 1023.4636     | 0.0146        | 14            | 97            | 105      | EDAANNYAR            | 4                | 0              |                 |            |      |
| 1085.6201                  | 1085.624      | 0.0039        | 4             | 113           | 121      | EIIDLVLDLDR          |                  |                |                 |            |      |
| 1085.6201                  | 1085.624      | 0.0039        | 4             | 113           | 121      | EIIDLVLDLDR          | 5                | 0              |                 |            |      |
| 1410.7739                  | 1410.7594     | -0.0145       | -10           | 85            | 96       | QLFHPEQLITGK         |                  |                |                 |            |      |
| 1410.7739                  | 1410.7594     | -0.0145       | -10           | 85            | 96       | QLFHPEQLITGK         |                  |                |                 |            |      |
| 1410.7739                  | 1410.7594     | -0.0145       | -10           | 85            | 96       | QLFHPEQLITGK         |                  |                |                 |            |      |
| 1701.9058                  | 1701.8801     | -0.0257       | -15           | 65            | 79       | AVFVDLEPTVIDEVR      | 27               | 71.582         |                 |            |      |
| 1701.9058                  | 1701.8801     | -0.0257       | -15           | 65            | 79       | AVFVDLEPTVIDEVR      |                  |                |                 |            |      |
| 1701.9058                  | 1701.8801     | -0.0257       | -15           | 65            | 79       | AVFVDLEPTVIDEVR      | 51               | 99.9           |                 |            |      |
| 1718.8821                  | 1718.8632     | -0.0189       | -11           | 216           | 229      | NLDIERPTYTNLNR       | 8                | 0              |                 |            |      |
| 1718.8821                  | 1718.8632     | -0.0189       | -11           | 216           | 229      | NLDIERPTYTNLNR       |                  |                |                 |            |      |
| 1824.9854                  | 1824.9506     | -0.0348       | -19           | 353           | 370      | VGINYQPPTVVPGGDLAK   |                  |                |                 |            |      |
| 2409.2085                  | 2409.2148     | 0.0063        | 3             | 244           | 264      | FDGALNVDLTEFQTNLVYPR |                  |                |                 |            |      |

| Protein Name               | Accession No.  | Peptide Count | Protein Score | Protein Score |          | Total Ion Score  | Total Ion C.I. % | Best Ion Score | Best Ion C.I. % | % Coverage             |      |
|----------------------------|----------------|---------------|---------------|---------------|----------|------------------|------------------|----------------|-----------------|------------------------|------|
|                            |                |               |               | C.I. %        |          |                  |                  |                |                 |                        |      |
| H+ transporting ATPase     | rf NP_476561.1 | 19            | 646           | 100           |          | 484              |                  | 100            | 116             | 100                    | 50.1 |
| <b>Peptide Information</b> |                |               |               |               |          |                  |                  |                |                 |                        |      |
| Calc. Mass                 | Obsrv. Mass    | ± da          | ± ppm         | Start Seq.    | End Seq. | Sequence         | Ion Score        | C. I. %        | Modification    |                        |      |
| 848.4593                   | 848.4594       | 0.0001        | 0             | 1             | 7        | MALRAMR          |                  |                |                 |                        |      |
| 873.4788                   | 873.4739       | -0.0049       | -6            | 30            | 37       | EQUALAVSR        |                  |                |                 |                        |      |
| 877.4526                   | 877.4526       | 0             | 0             | 38            | 44       | NYLSQPR          |                  |                |                 |                        |      |
| 877.4526                   | 877.4526       | 0             | 0             | 38            | 44       | NYLSQPR          | 31               | 93.206         |                 |                        |      |
| 877.4526                   | 877.4526       | 0             | 0             | 38            | 44       | NYLSQPR          | 41               | 99.248         |                 |                        |      |
| 921.4458                   | 921.4412       | -0.0046       | -5            | 404           | 412      | SAIGEGMTR        |                  |                |                 |                        |      |
| 937.4407                   | 937.4297       | -0.011        | -12           | 404           | 412      | SAIGEGMTR        |                  |                |                 | Oxidation (M)[7]       |      |
| 1104.5354                  | 1104.53        | -0.0054       | -5            | 121           | 130      | TPVSEDMGLGR      |                  |                |                 |                        |      |
| 1120.5303                  | 1120.5217      | -0.0086       | -8            | 121           | 130      | TPVSEDMGLGR      |                  |                |                 | Oxidation (M)[7]       |      |
| 1298.6045                  | 1298.6053      | 0.0008        | 1             | 110           | 120      | TSCEFTGDILR      | 101              | 100            |                 | Carbamidomethyl (C)[3] |      |
| 1298.6045                  | 1298.6053      | 0.0008        | 1             | 110           | 120      | TSCEFTGDILR      |                  |                |                 | Carbamidomethyl (C)[3] |      |
| 1338.6437                  | 1338.6447      | 0.001         | 1             | 461           | 471      | NFITQGPYENR      |                  |                |                 |                        |      |
| 1338.6437                  | 1338.6447      | 0.001         | 1             | 461           | 471      | NFITQGPYENR      | 96               | 100            |                 |                        |      |
| 1437.7373                  | 1437.7405      | 0.0032        | 2             | 495           | 506      | IPQSTLSEFYPR     | 72               | 100            |                 |                        |      |
| 1437.7373                  | 1437.7405      | 0.0032        | 2             | 495           | 506      | IPQSTLSEFYPR     |                  |                |                 |                        |      |
| 1437.7373                  | 1437.7405      | 0.0032        | 2             | 495           | 506      | IPQSTLSEFYPR     | 116              | 100            |                 |                        |      |
| 1520.7954                  | 1520.7828      | -0.0126       | -8            | 94            | 108      | AVVQVFEGTSGIDAK  |                  |                |                 |                        |      |
| 1556.8319                  | 1556.8228      | -0.0091       | -6            | 68            | 81       | YAEIVHLTLDPDGTK  |                  |                |                 |                        |      |
| 1596.9108                  | 1596.9116      | 0.0008        | 1             | 387           | 400      | QIYPPINVLPSLSR   |                  |                |                 |                        |      |
| 1596.9108                  | 1596.9116      | 0.0008        | 1             | 387           | 400      | QIYPPINVLPSLSR   | 85               | 100            |                 |                        |      |
| 1647.9427                  | 1647.9269      | -0.0158       | -10           | 49            | 64       | TVSGVNGPLVLDHVK  |                  |                |                 |                        |      |
| 1896.8837                  | 1896.8845      | 0.0008        | 0             | 322           | 337      | GFPGYMYTDLATIYER |                  |                |                 |                        |      |

|           |           |         |    |     |     |                        |  |    |        |  |                         |
|-----------|-----------|---------|----|-----|-----|------------------------|--|----|--------|--|-------------------------|
| 1912.8785 | 1912.877  | -0.0015 | -1 | 322 | 337 | GFPGYMYTDLATIYER       |  |    |        |  | Oxidation (M)[6]        |
| 1934.0051 | 1934.0004 | -0.0047 | -2 | 292 | 308 | HVLVILTMSSYAEALR       |  |    |        |  | Oxidation (M)[9]        |
| 2048.0593 | 2048.0579 | -0.0014 | -1 | 8   | 29  | GIVNGAAPPLPVPTGGPMAGAR |  |    |        |  | Oxidation (M)[18]       |
| 2178.1487 | 2178.155  | 0.0063  | 3  | 189 | 208 | IPIFSAAGLPHNEIAAQICR   |  | 45 | 99.715 |  | Carbamidomethyl (C)[19] |
| 2178.1487 | 2178.155  | 0.0063  | 3  | 189 | 208 | IPIFSAAGLPHNEIAAQICR   |  |    |        |  | Carbamidomethyl (C)[19] |
| 2197.0383 | 2197.1338 | 0.0955  | 43 | 322 | 340 | GFPGYMYTDLATIYERAGR    |  |    |        |  | Oxidation (M)[6]        |
| 2441.1687 | 2441.1953 | 0.0266  | 11 | 164 | 185 | IYPEEMIQTGISAIDGMNSIAR |  |    |        |  | Oxidation (M)[6,17]     |
| 2485.2214 | 2485.2373 | 0.0159  | 6  | 142 | 163 | GPVVLAEFDLDMGQPINPQCR  |  |    |        |  | Carbamidomethyl (C)[21] |

| Protein Name | Accession No.  | Peptide Count | Protein Score | Protein Score C.I.% | Total Ion Score | Total Ion C.I. % | Best Ion Score | Best Ion C.I.% | % Coverage |     |
|--------------|----------------|---------------|---------------|---------------------|-----------------|------------------|----------------|----------------|------------|-----|
| SNAP-25B     | dbj BAA20152.1 | 9             | 153           | 100                 | 85              |                  | 100            | 75             | 100        | 7.3 |

| Peptide Information | Calc. Mass | Obsrv. Mass | ± da    | ± ppm | Start Seq. | End Seq. | Sequence            | Ion Score | C. I. % | Modification       |
|---------------------|------------|-------------|---------|-------|------------|----------|---------------------|-----------|---------|--------------------|
|                     | 831.4431   | 831.4696    | 0.0265  | 32    | 136        | 142      | RVTNDAR             |           |         |                    |
|                     | 1064.4677  | 1064.4695   | 0.0018  | 2     | 9          | 16       | NELEEMQR            |           |         | Oxidation (M)[6]   |
|                     | 1064.4677  | 1064.4695   | 0.0018  | 2     | 9          | 16       | NELEEMQR            |           |         | Oxidation (M)[6]   |
|                     | 1224.6041  | 1224.6045   | 0.0004  | 0     | 125        | 135      | EQMAISGGFIR         |           |         | Oxidation (M)[3]   |
|                     | 1224.6041  | 1224.6045   | 0.0004  | 0     | 125        | 135      | EQMAISGGFIR         |           |         | Oxidation (M)[3]   |
|                     | 1248.6616  | 1248.6284   | -0.0332 | -27   | 31         | 40       | RMLQLVEESK          |           |         | Oxidation (M)[2]   |
|                     | 1434.6707  | 1434.6779   | 0.0072  | 5     | 18         | 30       | ADQLADESLESTR       | 75        | 100     |                    |
|                     | 1434.6707  | 1434.6779   | 0.0072  | 5     | 18         | 30       | ADQLADESLESTR       |           |         |                    |
|                     | 1434.6707  | 1434.6779   | 0.0072  | 5     | 18         | 30       | ADQLADESLESTR       | 44        | 99.517  |                    |
|                     | 1676.8159  | 1676.8105   | -0.0054 | -3    | 46         | 59       | TLVMLDEQGEQLER      |           |         | Oxidation (M)[4]   |
|                     | 1676.8159  | 1676.8105   | -0.0054 | -3    | 46         | 59       | TLVMLDEQGEQLER      |           |         | Oxidation (M)[4]   |
|                     | 1676.8159  | 1676.8105   | -0.0054 | -3    | 46         | 59       | TLVMLDEQGEQLER      | 4         | 0       | Oxidation (M)[4]   |
|                     | 1776.7639  | 1776.7579   | -0.006  | -3    | 162        | 176      | HMALDMGNEIDTQNR     |           |         | Oxidation (M)[2,6] |
|                     | 1776.7639  | 1776.7579   | -0.006  | -3    | 162        | 176      | HMALDMGNEIDTQNR     | 5         | 0       | Oxidation (M)[2,6] |
|                     | 1983.8204  | 1983.8989   | 0.0785  | 40    | 1          | 16       | MAEDAMRNELEEMQR     |           |         | Oxidation (M)[1]   |
|                     | 2176.0186  | 2176.022    | 0.0034  | 2     | 143        | 161      | ENEMDENLEQVSGIIGNLR |           |         | Oxidation (M)[4]   |
|                     | 2176.0186  | 2176.022    | 0.0034  | 2     | 143        | 161      | ENEMDENLEQVSGIIGNLR |           |         | Oxidation (M)[4]   |

| Protein Name | Accession No.  | Peptide Count | Protein Score | Protein Score C.I.% | Total Ion Score | Total Ion C.I. % | Best Ion Score | Best Ion C.I.% | % Coverage |      |
|--------------|----------------|---------------|---------------|---------------------|-----------------|------------------|----------------|----------------|------------|------|
| SNAP-25B     | dbj BAA20152.1 | 12            | 290           | 100                 | 148             |                  | 100            | 52             | 99.869     | 44.0 |

| Peptide Information | Calc. Mass | Obsrv. Mass | ± da    | ± ppm | Start Seq. | End Seq. | Sequence             | Ion Score | C. I. % | Modification           |
|---------------------|------------|-------------|---------|-------|------------|----------|----------------------|-----------|---------|------------------------|
|                     | 817.4315   | 817.4338    | 0.0023  | 3     | 23         | 29       | ASHSFLR              |           |         |                        |
|                     | 817.4315   | 817.4338    | 0.0023  | 3     | 23         | 29       | ASHSFLR              | 32        | 88.654  |                        |
|                     | 821.4263   | 821.4359    | 0.0096  | 12    | 30         | 37       | GLFGGNTR             | 23        | 0       |                        |
|                     | 821.4263   | 821.4359    | 0.0096  | 12    | 30         | 37       | GLFGGNTR             | 18        | 0       |                        |
|                     | 821.4263   | 821.4359    | 0.0096  | 12    | 30         | 37       | GLFGGNTR             |           |         |                        |
|                     | 853.405    | 853.4102    | 0.0052  | 6     | 314        | 320      | EFDSISR              |           |         |                        |
|                     | 853.405    | 853.4102    | 0.0052  | 6     | 314        | 320      | EFDSISR              | 52        | 99.869  |                        |
|                     | 1000.5244  | 1000.5168   | -0.0076 | -8    | 71         | 78       | LHMQLQSK             |           |         | Oxidation (M)[3]       |
|                     | 1317.5449  | 1317.5438   | -0.0011 | -1    | 38         | 47       | IEEACEMYTR           |           |         | Carbamidomethyl (C)[5] |
|                     | 1317.5449  | 1317.5438   | -0.0011 | -1    | 38         | 47       | IEEACEMYTR           |           |         | Carbamidomethyl (C)[5] |
|                     | 1405.7509  | 1405.7484   | -0.0025 | -2    | 321        | 331      | LDQWLTTMLLR          |           |         | Oxidation (M)[8]       |
|                     | 1482.7587  | 1482.7572   | -0.0015 | -1    | 217        | 229      | VAAYAAQLEQYQK        |           |         |                        |
|                     | 1508.6362  | 1508.6344   | -0.0018 | -1    | 277        | 288      | YEEMFPAFTDSR         |           |         | Oxidation (M)[4]       |
|                     | 1508.6362  | 1508.6344   | -0.0018 | -1    | 277        | 288      | YEEMFPAFTDSR         | 41        | 98.364  | Oxidation (M)[4]       |
|                     | 1508.6362  | 1508.6344   | -0.0018 | -1    | 277        | 288      | YEEMFPAFTDSR         | 8         | 0       | Oxidation (M)[4]       |
|                     | 1582.7133  | 1582.7101   | -0.0032 | -2    | 79         | 93       | HDSATSFVDAGNAYK      |           |         |                        |
|                     | 2060.9771  | 2060.9761   | -0.001  | 0     | 296        | 313      | LLEAHEEQNSEAYTEAVK   |           |         |                        |
|                     | 2060.9771  | 2060.9761   | -0.001  | 0     | 296        | 313      | LLEAHEEQNSEAYTEAVK   |           |         |                        |
|                     | 2135.0688  | 2135.0654   | -0.0034 | -2    | 230        | 248      | AIIEIYEQVGANTMDNPLLK |           |         |                        |
|                     | 2467.1228  | 2467.1248   | 0.002   | 1     | 95         | 116      | ADPQEAINCLNAAIDYTMGR |           |         | Oxidation (M)[13]      |
|                     |            |             |         |       |            |          |                      |           |         | Oxidation (M)[20]      |

| Protein Name                         | Accession No. | Peptide Count | Protein Score | Protein Score C.I.% | Total Ion Score | Total Ion C.I. %   | Best Ion Score | Best Ion C.I.% | % Coverage             |  |
|--------------------------------------|---------------|---------------|---------------|---------------------|-----------------|--------------------|----------------|----------------|------------------------|--|
| alpha-soluble NSF attachment protein | pir S58285    | 11            | 398           | 100                 | 259             | 100                | 104            | 100            | 46.4                   |  |
| Peptide Information                  |               |               |               |                     |                 |                    |                |                |                        |  |
| Calc. Mass                           | Obsrv. Mass   | ± da          | ± ppm         | Start Seq.          | End Seq.        | Sequence           | Ion Score      | C. I. %        | Modification           |  |
| 869.3999                             | 869.4064      | 0.0065        | 7             | 265                 | 271             | EYDSISR            |                |                |                        |  |
| 869.3999                             | 869.4064      | 0.0065        | 7             | 265                 | 271             | EYDSISR            | 27             | 57.725         |                        |  |
| 1175.5538                            | 1175.5592     | 0.0054        | 5             | 286                 | 295             | TIQGDEEDLR         | 47             | 99.52          |                        |  |
| 1175.5538                            | 1175.5592     | 0.0054        | 5             | 286                 | 295             | TIQGDEEDLR         |                |                |                        |  |
| 1184.5616                            | 1184.5587     | -0.0029       | -2            | 107                 | 116             | AIEIYDMGR          | 6              |                | 0 Oxidation (M)[8]     |  |
| 1184.5616                            | 1184.5587     | -0.0029       | -2            | 107                 | 116             | AIEIYDMGR          |                |                | Oxidation (M)[8]       |  |
| 1253.583                             | 1253.5865     | 0.0035        | 3             | 38                  | 47              | IEEACEIYAR         |                |                | Carbamidomethyl (C)[5] |  |
| 1253.583                             | 1253.5865     | 0.0035        | 3             | 38                  | 47              | IEEACEIYAR         | 81             | 100            | Carbamidomethyl (C)[5] |  |
| 1418.6943                            | 1418.6959     | 0.0016        | 1             | 7                   | 19              | QAEAMALLAEER       |                |                | Oxidation (M)[5]       |  |
| 1433.6511                            | 1433.6479     | -0.0032       | -2            | 95                  | 106             | ADPQAINCLMR        |                |                | Carbamidomethyl (C)[9] |  |
| 1460.6692                            | 1460.6735     | 0.0043        | 3             | 228                 | 239             | YEELFPAFSDSR       | 104            | 100            |                        |  |
| 1460.6692                            | 1460.6735     | 0.0043        | 3             | 228                 | 239             | YEELFPAFSDSR       |                |                |                        |  |
| 1460.6692                            | 1460.6735     | 0.0043        | 3             | 228                 | 239             | YEELFPAFSDSR       | 30             | 78.118         |                        |  |
| 1468.743                             | 1468.7383     | -0.0047       | -3            | 168                 | 180             | VAGYAAQLEQYQK      |                |                |                        |  |
| 1558.7173                            | 1558.712      | -0.0053       | -3            | 141                 | 153             | AIAHYEQSADYYK      |                |                |                        |  |
| 2067.0315                            | 2067.0212     | -0.0103       | -5            | 181                 | 199             | AIDIYEQVGTSMDSPLL  |                |                | Oxidation (M)[13]      |  |
| 2090.9875                            | 2090.9797     | -0.0078       | -4            | 247                 | 264             | LLEAHEEQNVDSYTESVK |                |                |                        |  |
| 2090.9875                            | 2090.9797     | -0.0078       | -4            | 247                 | 264             | LLEAHEEQNVDSYTESVK |                |                |                        |  |

| Protein Name                         | Accession No. | Peptide Count | Protein Score | Protein Score C.I.% | Total Ion Score | Total Ion C.I. %   | Best Ion Score | Best Ion C.I.% | % Coverage             |  |
|--------------------------------------|---------------|---------------|---------------|---------------------|-----------------|--------------------|----------------|----------------|------------------------|--|
| RAB GDP dissociation inhibitor alpha | spt P50398    | 7             | 150           | 100                 | 93              | 100                | 47             | 99.673         | 17.7                   |  |
| Peptide Information                  |               |               |               |                     |                 |                    |                |                |                        |  |
| Calc. Mass                           | Obsrv. Mass   | ± da          | ± ppm         | Start Seq.          | End Seq.        | Sequence           | Ion Score      | C. I. %        | Modification           |  |
| 938.4941                             | 938.4993      | 0.0052        | 6             | 131                 | 138             | LYESLAR            |                |                |                        |  |
| 938.4941                             | 938.4993      | 0.0052        | 6             | 131                 | 138             | LYESLAR            | 25             | 44.157         |                        |  |
| 938.4941                             | 938.4993      | 0.0052        | 6             | 131                 | 138             | LYESLAR            | 14             | 0              |                        |  |
| 1141.5922                            | 1141.5934     | 0.0012        | 1             | 10                  | 18              | MLLYTEVTR          |                |                | Oxidation (M)[1]       |  |
| 1141.5922                            | 1141.5934     | 0.0012        | 1             | 10                  | 18              | MLLYTEVTR          |                |                | Oxidation (M)[1]       |  |
| 1476.7152                            | 1476.7177     | 0.0025        | 2             | 199                 | 210             | QLICDPSYIPDR       | 16             | 0              | Carbamidomethyl (C)[4] |  |
| 1476.7152                            | 1476.7177     | 0.0025        | 2             | 199                 | 210             | QLICDPSYIPDR       | 8              | 0              | Carbamidomethyl (C)[4] |  |
| 1476.7152                            | 1476.7177     | 0.0025        | 2             | 199                 | 210             | QLICDPSYIPDR       |                |                | Carbamidomethyl (C)[4] |  |
| 1484.6686                            | 1484.6689     | 0.0003        | 0             | 77                  | 89              | TFEGVDPQTSMR       | 4              | 0              | Oxidation (M)[12]      |  |
| 1484.6686                            | 1484.6689     | 0.0003        | 0             | 77                  | 89              | TFEGVDPQTSMR       |                |                | Oxidation (M)[12]      |  |
| 1722.8796                            | 1722.8923     | 0.0127        | 7             | 269                 | 284             | YIAIASTTVETAPEK    |                |                |                        |  |
| 1852.8383                            | 1852.8461     | 0.0078        | 4             | 114                 | 128             | TDDYLDQPCLETINR    |                |                | Carbamidomethyl (C)[9] |  |
| 1852.8383                            | 1852.8461     | 0.0078        | 4             | 114                 | 128             | TDDYLDQPCLETINR    |                |                | Carbamidomethyl (C)[9] |  |
| 1852.8383                            | 1852.8461     | 0.0078        | 4             | 114                 | 128             | TDDYLDQPCLETINR    | 47             | 99.673         | Carbamidomethyl (C)[9] |  |
| 2199.0571                            | 2199.0671     | 0.01          | 5             | 230                 | 248             | NTNDANSCQIIIPQNVNR |                |                | Carbamidomethyl (C)[8] |  |
| 2199.0571                            | 2199.0671     | 0.01          | 5             | 230                 | 248             | NTNDANSCQIIIPQNVNR |                |                | Carbamidomethyl (C)[8] |  |
| 2199.0571                            | 2199.0671     | 0.01          | 5             | 230                 | 248             | NTNDANSCQIIIPQNVNR |                |                | Carbamidomethyl (C)[8] |  |

| Protein Name                             | Accession No. | Peptide Count | Protein Score | Protein Score C.I.% | Total Ion Score | Total Ion C.I. % | Best Ion Score | Best Ion C.I.% | % Coverage   |  |
|------------------------------------------|---------------|---------------|---------------|---------------------|-----------------|------------------|----------------|----------------|--------------|--|
| Protein disulfide isomerase A3 precursor | spt P11598    | 12            | 173           | 100                 | 80              | 100              | 28             | 58.011         | 24.0         |  |
| Peptide Information                      |               |               |               |                     |                 |                  |                |                |              |  |
| Calc. Mass                               | Obsrv. Mass   | ± da          | ± ppm         | Start Seq.          | End Seq.        | Sequence         | Ion Score      | C. I. %        | Modification |  |
| 877.489                                  | 877.4939      | 0.0049        | 6             | 297                 | 304             | LNFVAVSR         |                |                |              |  |
| 877.489                                  | 877.4939      | 0.0049        | 6             | 297                 | 304             | LNFVAVSR         | 20             | 0              |              |  |
| 995.5632                                 | 995.5688      | 0.0056        | 6             | 131                 | 140             | QAGPASVPLR       |                |                |              |  |
| 995.5632                                 | 995.5688      | 0.0056        | 6             | 131                 | 140             | QAGPASVPLR       | 0              | 0              |              |  |
| 997.5101                                 | 997.5241      | 0.014         | 14            | 153                 | 161             | DASVVGFFR        |                |                |              |  |
| 997.5101                                 | 997.5241      | 0.014         | 14            | 153                 | 161             | DASVVGFFR        | 16             | 0              |              |  |

|           |           |         |     |     |     |                  |    |        |  |  |                  |
|-----------|-----------|---------|-----|-----|-----|------------------|----|--------|--|--|------------------|
| 1188.5354 | 1188.5348 | -0.0006 | -1  | 336 | 344 | FVMQEEFSR        |    |        |  |  | Oxidation (M)[3] |
| 1188.5354 | 1188.5348 | -0.0006 | -1  | 336 | 344 | FVMQEEFSR        |    |        |  |  | Oxidation (M)[3] |
| 1191.6005 | 1191.6041 | 0.0036  | 3   | 63  | 73  | LAPEYEAATR       | 28 | 58.011 |  |  |                  |
| 1191.6005 | 1191.6041 | 0.0036  | 3   | 63  | 73  | LAPEYEAATR       |    |        |  |  |                  |
| 1191.6005 | 1191.6041 | 0.0036  | 3   | 63  | 73  | LAPEYEAATR       |    |        |  |  |                  |
| 1236.5127 | 1236.5243 | 0.0116  | 9   | 108 | 119 | DGEEAGAYDGPR     |    |        |  |  |                  |
| 1244.6633 | 1244.6599 | -0.0034 | -3  | 184 | 194 | FAHTNVESLVK      |    |        |  |  |                  |
| 1397.7059 | 1397.7083 | 0.0024  | 2   | 472 | 482 | ELNDFISYLQR      |    |        |  |  |                  |
| 1397.7059 | 1397.7083 | 0.0024  | 2   | 472 | 482 | ELNDFISYLQR      | 17 | 0      |  |  |                  |
| 1593.8483 | 1593.8467 | -0.0016 | -1  | 483 | 496 | EATNPPIQEEKPK    |    |        |  |  |                  |
| 1744.8864 | 1744.9275 | 0.0411  | 24  | 131 | 146 | QAGPASVPLRTEDEFK |    |        |  |  |                  |
| 1749.8541 | 1749.8126 | -0.0415 | -24 | 380 | 395 | VVVAESFDDIVNAEDK |    |        |  |  |                  |
| 1749.8541 | 1749.8126 | -0.0415 | -24 | 380 | 395 | VVVAESFDDIVNAEDK |    |        |  |  |                  |
| 1792.8977 | 1792.839  | -0.0587 | -33 | 180 | 194 | DNYRFAHTNVESLVK  |    |        |  |  |                  |

| Protein Name            |  | Accession No.  | Peptide Count | Protein Score | Protein Score |  | Total Ion Score | Total Ion C.I. % | Best Ion Score | Best Ion C.I. % | % Coverage |      |
|-------------------------|--|----------------|---------------|---------------|---------------|--|-----------------|------------------|----------------|-----------------|------------|------|
| Unnamed protein product |  | embjCAA37654.1 | 9             | 227           | C.I. %        |  | 100             | 130              | 100            | 35              | 92.025     | 21.6 |
| Peptide Information     |  |                |               |               |               |  |                 |                  |                |                 |            |      |

| Calc. Mass | Obsrv. Mass | ± da    | ± ppm | Start Seq. | End Seq. | Sequence               | Ion Score | C. I. % | Modification            |
|------------|-------------|---------|-------|------------|----------|------------------------|-----------|---------|-------------------------|
| 833.39     | 833.4079    | 0.0179  | 21    | 276        | 283      | APGFGDNR               | 31        | 77.986  |                         |
| 833.39     | 833.4079    | 0.0179  | 21    | 276        | 283      | APGFGDNR               |           |         |                         |
| 833.39     | 833.4079    | 0.0179  | 21    | 276        | 283      | APGFGDNR               | 30        | 71.64   |                         |
| 855.4682   | 855.4739    | 0.0057  | 7     | 108        | 115      | GANPVEIR               | 35        | 92.025  |                         |
| 855.4682   | 855.4739    | 0.0057  | 7     | 108        | 115      | GANPVEIR               |           |         |                         |
| 912.5876   | 912.5808    | -0.0068 | -7    | 267        | 275      | VGLQVVAVK              |           |         |                         |
| 960.5109   | 960.517     | 0.0061  | 6     | 395        | 403      | VTDALNATR              | 27        | 46.086  |                         |
| 960.5109   | 960.517     | 0.0061  | 6     | 395        | 403      | VTDALNATR              | 19        | 0       |                         |
| 960.5109   | 960.517     | 0.0061  | 6     | 395        | 403      | VTDALNATR              |           |         |                         |
| 1520.7512  | 1520.7471   | -0.0041 | -3    | 180        | 192      | TLNDELEIIEGMK          |           |         | Oxidation (M)[12]       |
| 1684.905   | 1684.9052   | 0.0002  | 0     | 404        | 420      | AAVEEGIVLGGGCALLR      | 17        | 0       | Carbamidomethyl (C)[13] |
| 1684.905   | 1684.9052   | 0.0002  | 0     | 404        | 420      | AAVEEGIVLGGGCALLR      |           |         | Carbamidomethyl (C)[13] |
| 1905.0552  | 1905.0566   | 0.0014  | 1     | 225        | 242      | ISSVQSIVPALEIANHR      |           |         |                         |
| 2040.002   | 2040.0024   | 0.0004  | 0     | 345        | 361      | IQEITEQLDITTESEYEK     |           |         |                         |
| 2560.2485  | 2560.251    | 0.0025  | 1     | 71         | 95       | LVQDVANNTNEEAGDGTATVLR |           |         |                         |
| 2560.2485  | 2560.251    | 0.0025  | 1     | 71         | 95       | LVQDVANNTNEEAGDGTATVLR |           |         |                         |
| 2560.2485  | 2560.251    | 0.0025  | 1     | 71         | 95       | LVQDVANNTNEEAGDGTATVLR | 20        | 0       |                         |

| Protein Name        |  | Accession No. | Peptide Count | Protein Score | Protein Score |  | Total Ion Score | Total Ion C.I. % | Best Ion Score | Best Ion C.I. % | % Coverage |      |
|---------------------|--|---------------|---------------|---------------|---------------|--|-----------------|------------------|----------------|-----------------|------------|------|
| Enolase 2, gamma    |  | gjl26023949   | 8             | 184           | C.I. %        |  | 100             | 90               | 100            | 68              | 99.995     | 21.2 |
| Peptide Information |  |               |               |               |               |  |                 |                  |                |                 |            |      |

| Calc. Mass | Obsrv. Mass | ± da    | ± ppm | Start Seq. | End Seq. | Sequence          | Ion Score | C. I. % | Modification       |
|------------|-------------|---------|-------|------------|----------|-------------------|-----------|---------|--------------------|
| 800.3824   | 800.3976    | 0.0152  | 19    | 257        | 262      | YDLDFK            |           |         |                    |
| 848.4161   | 848.4239    | 0.0078  | 9     | 423        | 429      | FAGHNFR           |           |         |                    |
| 848.4161   | 848.4239    | 0.0078  | 9     | 423        | 429      | FAGHNFR           |           |         |                    |
| 848.4161   | 848.4239    | 0.0078  | 9     | 423        | 429      | FAGHNFR           |           |         |                    |
| 1130.6204  | 1130.6077   | -0.0127 | -11   | 184        | 193      | LGAEVYHTLK        |           |         |                    |
| 1174.5586  | 1174.5623   | 0.0037  | 3     | 413        | 422      | IEEELGEEAR        | 68        | 99.995  |                    |
| 1174.5586  | 1174.5623   | 0.0037  | 3     | 413        | 422      | IEEELGEEAR        |           |         |                    |
| 1174.5586  | 1174.5623   | 0.0037  | 3     | 413        | 422      | IEEELGEEAR        | 64        | 99.988  |                    |
| 1380.7118  | 1380.705    | -0.0068 | -5    | 16         | 28       | GNPTVEVDLHTAK     |           |         |                    |
| 1380.7118  | 1380.705    | -0.0068 | -5    | 16         | 28       | GNPTVEVDLHTAK     |           |         |                    |
| 1620.7396  | 1620.7461   | 0.0065  | 4     | 240        | 253      | MVIGMDVAASEFYR    |           |         | Oxidation (M)[1,5] |
| 1620.7786  | 1620.7461   | -0.0325 | -20   | 90         | 103      | LDNLMLELDGTENK    |           |         | Oxidation (M)[5]   |
| 1620.7786  | 1620.7461   | -0.0325 | -20   | 90         | 103      | LDNLMLELDGTENK    |           |         | Oxidation (M)[5]   |
| 1804.9438  | 1804.9406   | -0.0032 | -2    | 33         | 50       | AAVPSGASTGIYEALRL |           |         |                    |
| 1804.9438  | 1804.9406   | -0.0032 | -2    | 33         | 50       | AAVPSGASTGIYEALRL | 23        | 0       |                    |



1804.9438 1804.9406 -0.0032 -2 33 50 AAVPSGASTGIYEALRLR 17 0

| Protein Name                                | Accession No. | Peptide Count | Protein Score | Protein Score C.I.% | Total Ion Score | Total Ion C.I. % | Best Ion Score | Best Ion C.I.% | % Coverage |      |
|---------------------------------------------|---------------|---------------|---------------|---------------------|-----------------|------------------|----------------|----------------|------------|------|
| Guanine nucleotide binding protein, alpha o | cr JCP51914   | 6             | 144           | 100                 | 84              |                  | 100            | 48             | 99.6       | 17.8 |

| Peptide Information | Calc. Mass | Obsrv. Mass | ± da   | ± ppm | Start Seq. | End Seq. | Sequence        | Ion Score | C. I. % | Modification |
|---------------------|------------|-------------|--------|-------|------------|----------|-----------------|-----------|---------|--------------|
|                     | 836.4512   | 836.4588    | 0.0076 | 9     | 228        | 234      | KDLFGEK         |           |         |              |
|                     | 891.4682   | 891.4689    | 0.0007 | 1     | 155        | 162      | LFDVGGQR        |           |         |              |
|                     | 891.4682   | 891.4689    | 0.0007 | 1     | 155        | 162      | LFDVGGQR        | 11        | 0       |              |
|                     | 891.4682   | 891.4689    | 0.0007 | 1     | 155        | 162      | LFDVGGQR        | 26        | 40.441  |              |
|                     | 1044.4996  | 1044.5084   | 0.0088 | 8     | 111        | 118      | YYLDSLDR        | 10        | 0       |              |
|                     | 1044.4996  | 1044.5084   | 0.0088 | 8     | 111        | 118      | YYLDSLDR        | 6         | 0       |              |
|                     | 1044.4996  | 1044.5084   | 0.0088 | 8     | 111        | 118      | YYLDSLDR        |           |         |              |
|                     | 1298.5933  | 1298.6355   | 0.0422 | 32    | 43         | 54       | AMDTLGVEYGDK    |           |         |              |
|                     | 1298.5933  | 1298.6355   | 0.0422 | 32    | 43         | 54       | AMDTLGVEYGDK    |           |         |              |
|                     | 1298.5933  | 1298.6355   | 0.0422 | 32    | 43         | 54       | AMDTLGVEYGDK    |           |         |              |
|                     | 1445.6907  | 1445.6952   | 0.0045 | 3     | 11         | 23       | IHHEDGFSGEDVK   |           |         |              |
|                     | 1689.8442  | 1689.8507   | 0.0065 | 4     | 119        | 133      | IGAADYQPTEQDILR | 48        | 99.6    |              |
|                     | 1689.8442  | 1689.8507   | 0.0065 | 4     | 119        | 133      | IGAADYQPTEQDILR |           |         |              |
|                     | 1689.8442  | 1689.8507   | 0.0065 | 4     | 119        | 133      | IGAADYQPTEQDILR | 7         | 0       |              |

| Protein Name                                 | Accession No.  | Peptide Count | Protein Score | Protein Score C.I.% | Total Ion Score | Total Ion C.I. % | Best Ion Score | Best Ion C.I.% | % Coverage |     |
|----------------------------------------------|----------------|---------------|---------------|---------------------|-----------------|------------------|----------------|----------------|------------|-----|
| Translationally controlled tumor protein (TC | rf XP_344132.1 | 3             | 129           | 100                 | 92              |                  | 100            | 46             | 99.57      | 5.8 |

| Peptide Information | Calc. Mass | Obsrv. Mass | ± da    | ± ppm | Start Seq. | End Seq. | Sequence   | Ion Score | C. I. % | Modification           |
|---------------------|------------|-------------|---------|-------|------------|----------|------------|-----------|---------|------------------------|
|                     | 851.3815   | 851.3894    | 0.0079  | 9     | 157        | 163      | DSLEMEK    |           |         |                        |
|                     | 1028.5371  | 1028.4962   | -0.0409 | -40   | 95         | 102      | IEEQKPER   | 46        | 99.57   |                        |
|                     | 1028.5371  | 1028.4962   | -0.0409 | -40   | 95         | 102      | IEEQKPER   |           |         | Carbamidomethyl (C)[7] |
|                     | 1213.6534  | 1213.614    | -0.0394 | -32   | 93         | 102      | GKIEEQKPER |           |         |                        |
|                     | 1213.6534  | 1213.614    | -0.0394 | -32   | 93         | 102      | GKIEEQKPER | 46        | 99.483  |                        |

| Protein Name    | Accession No. | Peptide Count | Protein Score | Protein Score C.I.% | Total Ion Score | Total Ion C.I. % | Best Ion Score | Best Ion C.I.% | % Coverage |      |
|-----------------|---------------|---------------|---------------|---------------------|-----------------|------------------|----------------|----------------|------------|------|
| Peroxiredoxin 2 | spt P35704    | 5             | 293           | 100                 | 226             |                  | 100            | 79             | 100        | 27.3 |

| Peptide Information | Calc. Mass | Obsrv. Mass | ± da    | ± ppm | Start Seq. | End Seq. | Sequence         | Ion Score | C. I. % | Modification |
|---------------------|------------|-------------|---------|-------|------------|----------|------------------|-----------|---------|--------------|
|                     | 876.5189   | 876.5029    | -0.016  | -18   | 128        | 135      | GLFIIDAK         | 29        | 69.146  |              |
|                     | 876.5189   | 876.5029    | -0.016  | -18   | 128        | 135      | GLFIIDAK         |           |         |              |
|                     | 937.4373   | 937.4267    | -0.0106 | -11   | 120        | 127      | NDEGIAYR         | 45        | 99.278  |              |
|                     | 937.4373   | 937.4267    | -0.0106 | -11   | 120        | 127      | NDEGIAYR         |           |         |              |
|                     | 937.4373   | 937.4267    | -0.0106 | -11   | 120        | 127      | NDEGIAYR         | 59        | 99.969  |              |
|                     | 1108.5997  | 1108.5862   | -0.0135 | -12   | 110        | 119      | SLSQNYGVLK       | 60        | 99.978  |              |
|                     | 1108.5997  | 1108.5862   | -0.0135 | -12   | 110        | 119      | SLSQNYGVLK       |           |         |              |
|                     | 1211.6742  | 1211.6682   | -0.006  | -5    | 140        | 150      | QITVNDLPVGR      |           |         |              |
|                     | 1211.6742  | 1211.6682   | -0.006  | -5    | 140        | 150      | QITVNDLPVGR      | 39        | 97.173  |              |
|                     | 1211.6742  | 1211.6682   | -0.006  | -5    | 140        | 150      | QITVNDLPVGR      | 79        | 100     |              |
|                     | 1706.9686  | 1706.9591   | -0.0095 | -6    | 93         | 109      | EGGLGPLNIPLADVTK |           |         |              |
|                     | 1706.9686  | 1706.9591   | -0.0095 | -6    | 93         | 109      | EGGLGPLNIPLADVTK |           |         |              |

| Protein Name                              | Accession No. | Peptide Count | Protein Score | Protein Score C.I.% | Total Ion Score | Total Ion C.I. % | Best Ion Score | Best Ion C.I.% | % Coverage |      |
|-------------------------------------------|---------------|---------------|---------------|---------------------|-----------------|------------------|----------------|----------------|------------|------|
| Proteasome subunit, beta type 6 precursor | spt P28073    | 8             | 198           | 100                 | 121             |                  | 100            | 54             | 99.946     | 38.2 |

| Peptide Information | Calc. Mass | Obsrv. Mass | ± da   | ± ppm | Start Seq. | End Seq. | Sequence  | Ion Score | C. I. % | Modification |
|---------------------|------------|-------------|--------|-------|------------|----------|-----------|-----------|---------|--------------|
|                     | 847.4268   | 847.434     | 0.0072 | 8     | 164        | 172      | DGSSGGVIR |           |         |              |
|                     | 847.4268   | 847.434     | 0.0072 | 8     | 164        | 172      | DGSSGGVIR |           |         |              |

|           |           |         |     |     |     |                       |    |        |                            |  |  |
|-----------|-----------|---------|-----|-----|-----|-----------------------|----|--------|----------------------------|--|--|
| 1083.543  | 1083.5366 | -0.0064 | -6  | 17  | 26  | TTTGSYIANR            |    |        |                            |  |  |
| 1083.543  | 1083.5366 | -0.0064 | -6  | 17  | 26  | TTTGSYIANR            |    |        |                            |  |  |
| 1110.6517 | 1110.6393 | -0.0124 | -11 | 184 | 193 | QVLLGDQIPK            |    |        |                            |  |  |
| 1171.6429 | 1171.6461 | 0.0032  | 3   | 173 | 183 | LAAIQQSGVER           | 45 | 99.529 |                            |  |  |
| 1171.6429 | 1171.6461 | 0.0032  | 3   | 173 | 183 | LAAIQQSGVER           |    |        |                            |  |  |
| 1171.6429 | 1171.6461 | 0.0032  | 3   | 173 | 183 | LAAIQQSGVER           | 54 | 99.946 |                            |  |  |
| 1490.7598 | 1490.7704 | 0.0106  | 7   | 2   | 16  | AVQFDGGVVLGADSR       |    |        |                            |  |  |
| 1568.7461 | 1568.7571 | 0.011   | 7   | 31  | 42  | LTPIHDFHIFCCR         | 54 | 99.943 | Carbamidomethyl (C)[10,11] |  |  |
| 1568.7461 | 1568.7571 | 0.011   | 7   | 31  | 42  | LTPIHDFHIFCCR         | 8  | 0      | Carbamidomethyl (C)[10,11] |  |  |
| 1568.7461 | 1568.7571 | 0.011   | 7   | 31  | 42  | LTPIHDFHIFCCR         |    |        | Carbamidomethyl (C)[10,11] |  |  |
| 1952.9204 | 1952.9756 | 0.0552  | 28  | 147 | 163 | DECLQFTANALALAMER     |    |        | Carbamidomethyl (C)[3]     |  |  |
| 1952.9204 | 1952.9756 | 0.0552  | 28  | 147 | 163 | DECLQFTANALALAMER     |    |        | Carbamidomethyl (C)[3]     |  |  |
| 2362.0986 | 2362.0947 | -0.0039 | -2  | 120 | 141 | QSFAIGGSGSSYIYGVDATYR |    |        | Carbamidomethyl (C)[3]     |  |  |
| 2362.0986 | 2362.0947 | -0.0039 | -2  | 120 | 141 | QSFAIGGSGSSYIYGVDATYR | 13 | 0      |                            |  |  |
| 2362.0986 | 2362.0947 | -0.0039 | -2  | 120 | 141 | QSFAIGGSGSSYIYGVDATYR | 13 | 0      |                            |  |  |

| Protein Name                            | Accession No. | Peptide Count | Protein Score | Protein Score C.I.% | Total Ion Score | Total Ion C.I. % | Best Ion Score | Best Ion C.I.% | % Coverage |      |
|-----------------------------------------|---------------|---------------|---------------|---------------------|-----------------|------------------|----------------|----------------|------------|------|
| Isocitrate dehydrogenase 3 (NAD+) alpha | gi 16758446   | 14            | 522           | 100                 | 375             |                  | 100            | 127            | 100        | 38.5 |

| Peptide Information | Calc. Mass | Obsrv. Mass | ± da    | ± ppm | Start Seq. | End Seq. | Sequence                | Ion Score | C. I. % | Modification             |
|---------------------|------------|-------------|---------|-------|------------|----------|-------------------------|-----------|---------|--------------------------|
|                     | 818.4617   | 818.4658    | 0.0041  | 5     | 170        | 177      | LITEGASK                |           |         |                          |
|                     | 855.4682   | 855.4697    | 0.0015  | 2     | 193        | 200      | SNVTAVHK                | 42        | 99.008  |                          |
|                     | 855.4682   | 855.4697    | 0.0015  | 2     | 193        | 200      | SNVTAVHK                | 43        | 99.035  |                          |
|                     | 855.4682   | 855.4697    | 0.0015  | 2     | 193        | 200      | SNVTAVHK                |           |         |                          |
|                     | 987.4968   | 987.499     | 0.0022  | 2     | 78         | 85       | WMIPPEAK                |           |         | Oxidation (M)[2]         |
|                     | 1028.516   | 1028.5328   | 0.0168  | 16    | 59         | 66       | APIQWEER                | 43        | 99.179  |                          |
|                     | 1028.516   | 1028.5328   | 0.0168  | 16    | 59         | 66       | APIQWEER                |           |         |                          |
|                     | 1041.5687  | 1041.5758   | 0.0071  | 7     | 67         | 77       | NVTAIQGPGGK             |           |         |                          |
|                     | 1054.5238  | 1054.5271   | 0.0033  | 3     | 206        | 214      | MSDGLFLQK               |           |         | Oxidation (M)[1]         |
|                     | 1123.5817  | 1123.5925   | 0.0108  | 10    | 327        | 336      | IEAACFATIK              |           |         | Carbamidomethyl (C)[5]   |
|                     | 1142.5411  | 1142.5515   | 0.0104  | 9     | 317        | 326      | HMGLFDHAAK              |           |         | Oxidation (M)[2]         |
|                     | 1216.5996  | 1216.6183   | 0.0187  | 15    | 179        | 188      | IAEFAFEYAR              | 86        | 100     |                          |
|                     | 1216.5996  | 1216.6183   | 0.0187  | 15    | 179        | 188      | IAEFAFEYAR              | 88        | 100     |                          |
|                     | 1216.5996  | 1216.6183   | 0.0187  | 15    | 179        | 188      | IAEFAFEYAR              |           |         |                          |
|                     | 1316.5245  | 1316.5454   | 0.0209  | 16    | 351        | 360      | CSDFTTEEICR             |           |         | Carbamidomethyl (C)[1,9] |
|                     | 1316.5245  | 1316.5454   | 0.0209  | 16    | 351        | 360      | CSDFTTEEICR             | 75        | 100     | Carbamidomethyl (C)[1,9] |
|                     | 1391.7529  | 1391.7712   | 0.0183  | 13    | 135        | 146      | TPYTDVNIVTIR            | 127       | 100     |                          |
|                     | 1391.7529  | 1391.7712   | 0.0183  | 13    | 135        | 146      | TPYTDVNIVTIR            |           |         |                          |
|                     | 1391.7529  | 1391.7712   | 0.0183  | 13    | 135        | 146      | TPYTDVNIVTIR            | 99        | 100     |                          |
|                     | 1606.8734  | 1606.8842   | 0.0108  | 7     | 101        | 115      | TPIAAGHPSMNLRL          |           |         | Oxidation (M)[10]        |
|                     | 1606.8734  | 1606.8842   | 0.0108  | 7     | 101        | 115      | TPIAAGHPSMNLRL          |           |         | Oxidation (M)[10]        |
|                     | 1894.9435  | 1894.948    | 0.0045  | 2     | 300        | 316      | DMANPTALLLSAVMMLR       |           |         | Oxidation (M)[2,14,15]   |
|                     | 2502.2358  | 2502.2295   | -0.0063 | -3    | 147        | 169      | ENTEGEYSGIEHVIVDGVVQSIK |           |         |                          |
|                     | 2502.2358  | 2502.2295   | -0.0063 | -3    | 147        | 169      | ENTEGEYSGIEHVIVDGVVQSIK |           |         |                          |

| Protein Name                            | Accession No. | Peptide Count | Protein Score | Protein Score C.I.% | Total Ion Score | Total Ion C.I. % | Best Ion Score | Best Ion C.I.% | % Coverage |      |
|-----------------------------------------|---------------|---------------|---------------|---------------------|-----------------|------------------|----------------|----------------|------------|------|
| Isocitrate dehydrogenase 3 (NAD+) alpha | gi 16758446   | 12            | 490           | 100                 | 367             |                  | 100            | 123            | 100        | 35.4 |

| Peptide Information | Calc. Mass | Obsrv. Mass | ± da   | ± ppm | Start Seq. | End Seq. | Sequence    | Ion Score | C. I. % | Modification     |
|---------------------|------------|-------------|--------|-------|------------|----------|-------------|-----------|---------|------------------|
|                     | 855.4682   | 855.4721    | 0.0039 | 5     | 193        | 200      | SNVTAVHK    |           |         |                  |
|                     | 855.4682   | 855.4721    | 0.0039 | 5     | 193        | 200      | SNVTAVHK    | 42        | 98.953  |                  |
|                     | 855.4682   | 855.4721    | 0.0039 | 5     | 193        | 200      | SNVTAVHK    | 28        | 73.4    |                  |
|                     | 987.4968   | 987.4988    | 0.002  | 2     | 78         | 85       | WMIPPEAK    |           |         | Oxidation (M)[2] |
|                     | 1028.516   | 1028.5276   | 0.0116 | 11    | 59         | 66       | APIQWEER    | 27        | 65.969  |                  |
|                     | 1028.516   | 1028.5276   | 0.0116 | 11    | 59         | 66       | APIQWEER    |           |         |                  |
|                     | 1041.5687  | 1041.5729   | 0.0042 | 4     | 67         | 77       | NVTAIQGPGGK |           |         |                  |

|           |           |         |    |     |     |                          |     |        |  |  |                          |
|-----------|-----------|---------|----|-----|-----|--------------------------|-----|--------|--|--|--------------------------|
| 1054.5238 | 1054.5273 | 0.0035  | 3  | 206 | 214 | MSDGLFLQK                |     |        |  |  | Oxidation (M)[1]         |
| 1142.5411 | 1142.5481 | 0.007   | 6  | 317 | 326 | HMGLFDHAAK               |     |        |  |  | Oxidation (M)[2]         |
| 1216.5996 | 1216.6154 | 0.0158  | 13 | 179 | 188 | IAEFAFEYAR               | 52  | 99.907 |  |  |                          |
| 1216.5996 | 1216.6154 | 0.0158  | 13 | 179 | 188 | IAEFAFEYAR               | 101 | 100    |  |  |                          |
| 1216.5996 | 1216.6154 | 0.0158  | 13 | 179 | 188 | IAEFAFEYAR               |     |        |  |  |                          |
| 1316.5245 | 1316.5406 | 0.0161  | 12 | 351 | 360 | CSDFTTEEICR              |     |        |  |  | Carbamidomethyl (C)[1,9] |
| 1316.5245 | 1316.5406 | 0.0161  | 12 | 351 | 360 | CSDFTTEEICR              | 74  | 100    |  |  | Carbamidomethyl (C)[1,9] |
| 1391.7529 | 1391.7651 | 0.0122  | 9  | 135 | 146 | TPYTDVNIIVTIR            | 123 | 100    |  |  |                          |
| 1391.7529 | 1391.7651 | 0.0122  | 9  | 135 | 146 | TPYTDVNIIVTIR            | 92  | 100    |  |  |                          |
| 1391.7529 | 1391.7651 | 0.0122  | 9  | 135 | 146 | TPYTDVNIIVTIR            |     |        |  |  |                          |
| 1606.8734 | 1606.8762 | 0.0028  | 2  | 101 | 115 | TPIAAGHPSMNLRLR          |     |        |  |  | Oxidation (M)[10]        |
| 1606.8734 | 1606.8762 | 0.0028  | 2  | 101 | 115 | TPIAAGHPSMNLRLR          |     |        |  |  | Oxidation (M)[10]        |
| 1894.9435 | 1894.9338 | -0.0097 | -5 | 300 | 316 | DMANPTALLLSAVMMLR        |     |        |  |  | Oxidation (M)[2,14,15]   |
| 2502.2358 | 2502.2271 | -0.0087 | -3 | 147 | 169 | ENTEGEYSIGIEHVIVDGVVQSIK |     |        |  |  |                          |

|                                               |               |               |               |        |                 |                  |                |                |            |      |  | Protein Score |
|-----------------------------------------------|---------------|---------------|---------------|--------|-----------------|------------------|----------------|----------------|------------|------|--|---------------|
| Protein Name                                  | Accession No. | Peptide Count | Protein Score | C.I.%  | Total Ion Score | Total Ion C.I. % | Best Ion Score | Best Ion C.I.% | % Coverage |      |  |               |
| Platelet-activating factor acetylhydrolase IB | gij11693154   | 3             | 75            | 99.904 | 55              |                  | 99.981         | 55             | 99.981     | 15.7 |  |               |
| Peptide Information                           |               |               |               |        |                 |                  |                |                |            |      |  |               |

| Calc. Mass | Obsrv. Mass | ± da    | ± ppm | Start Seq. | End Seq. | Sequence         | Ion Score | C. I. % | Modification |  |  |
|------------|-------------|---------|-------|------------|----------|------------------|-----------|---------|--------------|--|--|
| 910.5104   | 910.4982    | -0.0122 | -13   | 143        | 150      | GEKPNPLR         |           |         |              |  |  |
| 993.6818   | 993.6725    | -0.0093 | -9    | 134        | 142      | IIVLGLLPR        | 55        | 99.981  |              |  |  |
| 993.6818   | 993.6725    | -0.0093 | -9    | 134        | 142      | IIVLGLLPR        |           |         |              |  |  |
| 2045.045   | 2045.0396   | -0.0054 | -3    | 61         | 79       | ELFSPHALNFGIGDTR |           |         |              |  |  |

|                                        |               |               |               |       |                 |                  |                |                |            |      |  | Protein Score |
|----------------------------------------|---------------|---------------|---------------|-------|-----------------|------------------|----------------|----------------|------------|------|--|---------------|
| Protein Name                           | Accession No. | Peptide Count | Protein Score | C.I.% | Total Ion Score | Total Ion C.I. % | Best Ion Score | Best Ion C.I.% | % Coverage |      |  |               |
| Growth factor receptor bound protein 2 | cralrCP46282  | 6             | 226           | 100   | 155             |                  | 100            | 63             | 99.987     | 25.8 |  |               |
| Peptide Information                    |               |               |               |       |                 |                  |                |                |            |      |  |               |

| Calc. Mass | Obsrv. Mass | ± da    | ± ppm | Start Seq. | End Seq. | Sequence     | Ion Score | C. I. % | Modification |                        |  |
|------------|-------------|---------|-------|------------|----------|--------------|-----------|---------|--------------|------------------------|--|
| 918.5155   | 918.5193    | 0.0038  | 4     | 143        | 149      | NQQIFLR      | 49        | 99.666  |              |                        |  |
| 918.5155   | 918.5193    | 0.0038  | 4     | 143        | 149      | NQQIFLR      |           |         |              |                        |  |
| 918.5155   | 918.5193    | 0.0038  | 4     | 143        | 149      | NQQIFLR      | 63        | 99.987  |              |                        |  |
| 928.4999   | 928.5024    | 0.0025  | 3     | 79         | 86       | HGAFILR      |           |         |              |                        |  |
| 962.5053   | 962.5117    | 0.0064  | 7     | 194        | 201      | NYVTPVNR     |           |         |              |                        |  |
| 962.5053   | 962.5117    | 0.0064  | 7     | 194        | 201      | NYVTPVNR     | 40        | 97.19   |              |                        |  |
| 1091.5269  | 1091.5247   | -0.0022 | -2    | 101        | 109      | FGNDVQHFK    | 14        | 0       |              |                        |  |
| 1091.5269  | 1091.5247   | -0.0022 | -2    | 101        | 109      | FGNDVQHFK    | 35        | 91.256  |              |                        |  |
| 1091.5269  | 1091.5247   | -0.0022 | -2    | 101        | 109      | FGNDVQHFK    |           |         |              |                        |  |
| 1334.5729  | 1334.5679   | -0.005  | -4    | 182        | 193      | GACHGQTMFPR  |           |         |              | Oxidation (M)[9]       |  |
| 1334.5729  | 1334.5679   | -0.005  | -4    | 182        | 193      | GACHGQTMFPR  |           |         |              | Oxidation (M)[9]       |  |
| 1334.5729  | 1334.5679   | -0.005  | -4    | 182        | 193      | GACHGQTMFPR  |           |         |              | Carbamidomethyl (C)[3] |  |
| 1506.7335  | 1506.7389   | 0.0054  | 4     | 125        | 136      | FNSLNELVDYHR |           |         |              |                        |  |
| 1506.7335  | 1506.7389   | 0.0054  | 4     | 125        | 136      | FNSLNELVDYHR | 18        | 0       |              |                        |  |
| 1506.7335  | 1506.7389   | 0.0054  | 4     | 125        | 136      | FNSLNELVDYHR |           |         |              |                        |  |

|                               |               |               |               |       |                 |                  |                |                |            |      |  | Protein Score |
|-------------------------------|---------------|---------------|---------------|-------|-----------------|------------------|----------------|----------------|------------|------|--|---------------|
| Protein Name                  | Accession No. | Peptide Count | Protein Score | C.I.% | Total Ion Score | Total Ion C.I. % | Best Ion Score | Best Ion C.I.% | % Coverage |      |  |               |
| Stathmin (Phosphoprotein p19) | sptjP13668    | 8             | 448           | 100   | 341             |                  | 100            | 106            | 100        | 52.3 |  |               |
| Peptide Information           |               |               |               |       |                 |                  |                |                |            |      |  |               |

| Calc. Mass | Obsrv. Mass | ± da    | ± ppm | Start Seq. | End Seq. | Sequence | Ion Score | C. I. % | Modification |  |  |
|------------|-------------|---------|-------|------------|----------|----------|-----------|---------|--------------|--|--|
| 817.405    | 817.4184    | 0.0134  | 16    | 53         | 59       | LEAAEER  |           |         |              |  |  |
| 817.405    | 817.4184    | 0.0134  | 16    | 53         | 59       | LEAAEER  | 19        | 0       |              |  |  |
| 912.4785   | 912.4784    | -0.0001 | 0     | 62         | 69       | SHEAEVLK |           |         |              |  |  |
| 912.4785   | 912.4784    | -0.0001 | 0     | 62         | 69       | SHEAEVLK | 50        | 99.599  |              |  |  |
| 945.4999   | 945.5049    | 0.005   | 5     | 52         | 59       | KLEAAEER | 71        | 99.997  |              |  |  |
| 945.4999   | 945.5049    | 0.005   | 5     | 52         | 59       | KLEAAEER |           |         |              |  |  |
| 945.4999   | 945.5049    | 0.005   | 5     | 52         | 59       | KLEAAEER | 37        | 91.508  |              |  |  |

|           |           |         |    |     |     |               |     |        |
|-----------|-----------|---------|----|-----|-----|---------------|-----|--------|
| 1011.5217 | 1011.525  | 0.0033  | 3  | 126 | 133 | DKHVEEVR      | 75  | 99.999 |
| 1011.5217 | 1011.525  | 0.0033  | 3  | 126 | 133 | DKHVEEVR      |     |        |
| 1074.5677 | 1074.5638 | -0.0039 | -4 | 43  | 51  | DLSLEEEIQK    | 20  | 0      |
| 1074.5677 | 1074.5638 | -0.0039 | -4 | 43  | 51  | DLSLEEEIQK    |     |        |
| 1139.6055 | 1139.6189 | 0.0134  | 12 | 76  | 84  | EHEKEVLQK     |     |        |
| 1165.5483 | 1165.5483 | 0       | 0  | 85  | 94  | AIEENNNFSK    |     |        |
| 1165.5483 | 1165.5483 | 0       | 0  | 85  | 94  | AIEENNNFSK    |     |        |
| 1388.7532 | 1388.756  | 0.0028  | 2  | 14  | 26  | ASGQAFELILSPR | 70  | 99.996 |
| 1388.7532 | 1388.756  | 0.0028  | 2  | 14  | 26  | ASGQAFELILSPR |     |        |
| 1388.7532 | 1388.756  | 0.0028  | 2  | 14  | 26  | ASGQAFELILSPR | 106 | 100    |

| Protein Name                            | Accession No. | Peptide Count | Protein Score | Protein Score C.I.% | Total Ion Score | Total Ion C.I. %          | Best Ion Score | Best Ion C.I.% | % Coverage   |      |
|-----------------------------------------|---------------|---------------|---------------|---------------------|-----------------|---------------------------|----------------|----------------|--------------|------|
| Beta-synuclein (Phosphoneuroprotein 14) | gij2501106    | 4             | 199           | 100                 | 135             |                           | 100            | 90             | 100          | 41.8 |
| Peptide Information                     |               |               |               |                     |                 |                           |                |                |              |      |
| Calc. Mass                              | Obsrv. Mass   | ± da          | ± ppm         | Start Seq.          | End Seq.        | Sequence                  | Ion Score      | C. I. %        | Modification |      |
| 873.4675                                | 873.4404      | -0.0271       | -31           | 13                  | 21              | EGVVAIAEK                 |                |                |              |      |
| 951.5145                                | 951.4857      | -0.0288       | -30           | 35                  | 43              | EGVLYVGSK                 | 40             | 96.793         |              |      |
| 951.5145                                | 951.4857      | -0.0288       | -30           | 35                  | 43              | EGVLYVGSK                 |                |                |              |      |
| 951.5145                                | 951.4857      | -0.0288       | -30           | 35                  | 43              | EGVLYVGSK                 | 41             | 97.333         |              |      |
| 1272.6793                               | 1272.6532     | -0.0261       | -21           | 46                  | 58              | EGVVQGVASVAEK             | 90             | 100            |              |      |
| 1272.6793                               | 1272.6532     | -0.0261       | -21           | 46                  | 58              | EGVVQGVASVAEK             |                |                |              |      |
| 1272.6793                               | 1272.6532     | -0.0261       | -21           | 46                  | 58              | EGVVQGVASVAEK             | 45             | 99.071         |              |      |
| 2326.2148                               | 2326.2219     | 0.0071        | 3             | 61                  | 85              | EQASHLGGAVFSGAGNIAAATGLVK | 4              | 0              |              |      |
| 2326.2148                               | 2326.2219     | 0.0071        | 3             | 61                  | 85              | EQASHLGGAVFSGAGNIAAATGLVK |                |                |              |      |
| 2326.2148                               | 2326.2219     | 0.0071        | 3             | 61                  | 85              | EQASHLGGAVFSGAGNIAAATGLVK |                |                |              |      |

| Protein Name                                 | Accession No. | Peptide Count | Protein Score | Protein Score C.I.% | Total Ion Score | Total Ion C.I. %    | Best Ion Score | Best Ion C.I.% | % Coverage   |      |
|----------------------------------------------|---------------|---------------|---------------|---------------------|-----------------|---------------------|----------------|----------------|--------------|------|
| Low M(r) phosphotyrosine protein phosphatase | gij257209     | 4             | 166           | 100                 | 114             |                     | 100            | 55             | 99.919       | 31.6 |
| Peptide Information                          |               |               |               |                     |                 |                     |                |                |              |      |
| Calc. Mass                                   | Obsrv. Mass   | ± da          | ± ppm         | Start Seq.          | End Seq.        | Sequence            | Ion Score      | C. I. %        | Modification |      |
| 989.5414                                     | 989.5461      | 0.0047        | 5             | 21                  | 29              | SPIAEAVFR           | 55             | 99.904         |              |      |
| 989.5414                                     | 989.5461      | 0.0047        | 5             | 21                  | 29              | SPIAEAVFR           |                |                |              |      |
| 989.5414                                     | 989.5461      | 0.0047        | 5             | 21                  | 29              | SPIAEAVFR           | 55             | 99.919         |              |      |
| 1262.6627                                    | 1262.6582     | -0.0045       | -4            | 115                 | 125             | IELLGSYDPQK         |                |                |              |      |
| 1262.6627                                    | 1262.6582     | -0.0045       | -4            | 115                 | 125             | IELLGSYDPQK         | 28             | 59.275         |              |      |
| 1447.6812                                    | 1447.6949     | 0.0137        | 9             | 31                  | 42              | LVTDENVSDNWR        |                |                |              |      |
| 1955.8981                                    | 1955.9064     | 0.0083        | 4             | 43                  | 60              | IDSAAATSTYEVGNPPDYR | 31             | 76.511         |              |      |
| 1955.8981                                    | 1955.9064     | 0.0083        | 4             | 43                  | 60              | IDSAAATSTYEVGNPPDYR | 31             | 76.727         |              |      |
| 1955.8981                                    | 1955.9064     | 0.0083        | 4             | 43                  | 60              | IDSAAATSTYEVGNPPDYR |                |                |              |      |

| Protein Name        | Accession No. | Peptide Count | Protein Score | Protein Score C.I.% | Total Ion Score | Total Ion C.I. %     | Best Ion Score | Best Ion C.I.% | % Coverage   |      |
|---------------------|---------------|---------------|---------------|---------------------|-----------------|----------------------|----------------|----------------|--------------|------|
| Synuclein, alpha    | gij9507125    | 4             | 240           | 100                 | 185             |                      | 100            | 79             | 100          | 41.4 |
| Peptide Information |               |               |               |                     |                 |                      |                |                |              |      |
| Calc. Mass          | Obsrv. Mass   | ± da          | ± ppm         | Start Seq.          | End Seq.        | Sequence             | Ion Score      | C. I. %        | Modification |      |
| 951.5145            | 951.5161      | 0.0016        | 2             | 35                  | 43              | EGVLYVGSK            | 36             | 93.199         |              |      |
| 951.5145            | 951.5161      | 0.0016        | 2             | 35                  | 43              | EGVLYVGSK            |                |                |              |      |
| 1325.7059           | 1325.7047     | -0.0012       | -1            | 46                  | 58              | EGVHGVTTVAEK         | 79             | 100            |              |      |
| 1325.7059           | 1325.7047     | -0.0012       | -1            | 46                  | 58              | EGVHGVTTVAEK         | 24             | 0              |              |      |
| 1325.7059           | 1325.7047     | -0.0012       | -1            | 46                  | 58              | EGVHGVTTVAEK         |                |                |              |      |
| 1505.7958           | 1505.795      | -0.0008       | -1            | 81                  | 96              | TVEGAGNIAAATGFVK     | 50             | 99.752         |              |      |
| 1505.7958           | 1505.795      | -0.0008       | -1            | 81                  | 96              | TVEGAGNIAAATGFVK     | 22             | 0              |              |      |
| 1505.7958           | 1505.795      | -0.0008       | -1            | 81                  | 96              | TVEGAGNIAAATGFVK     |                |                |              |      |
| 1928.0447           | 1928.0422     | -0.0025       | -1            | 61                  | 80              | EQVTNVGGAVVTGVTAVAQK |                |                |              |      |
| 1928.0447           | 1928.0422     | -0.0025       | -1            | 61                  | 80              | EQVTNVGGAVVTGVTAVAQK | 20             | 0              |              |      |
| 1928.0447           | 1928.0422     | -0.0025       | -1            | 61                  | 80              | EQVTNVGGAVVTGVTAVAQK |                |                |              |      |

| Protein Name                            | Accession No. | Peptide Count | Protein Score |            | Total Ion Score | Total Ion C.I. %     | Best Ion Score | Best Ion C.I.% | % Coverage   |      |
|-----------------------------------------|---------------|---------------|---------------|------------|-----------------|----------------------|----------------|----------------|--------------|------|
|                                         |               |               | Protein Score | C.I.%      |                 |                      |                |                |              |      |
| Synuclein, alpha<br>Peptide Information | gi 9507125    | 5             | 394           | 100        | 314             |                      | 100            | 93             | 100          | 47.9 |
| Calc. Mass                              | Obsrv. Mass   | ± da          | ± ppm         | Start Seq. | End Seq.        | Sequence             | Ion Score      | C. I. %        | Modification |      |
| 873.4675                                | 873.4681      | 0.0006        | 1             | 13         | 21              | EGVVAAREK            |                |                |              |      |
| 951.5145                                | 951.5106      | -0.0039       | -4            | 35         | 43              | EGVLYVGSK            | 39             | 96.469         |              |      |
| 951.5145                                | 951.5106      | -0.0039       | -4            | 35         | 43              | EGVLYVGSK            | 45             | 98.979         |              |      |
| 951.5145                                | 951.5106      | -0.0039       | -4            | 35         | 43              | EGVLYVGSK            |                |                |              |      |
| 1325.7059                               | 1325.7023     | -0.0036       | -3            | 46         | 58              | EGVVHGVTTVAEK        |                |                |              |      |
| 1325.7059                               | 1325.7023     | -0.0036       | -3            | 46         | 58              | EGVVHGVTTVAEK        | 34             | 86.135         |              |      |
| 1325.7059                               | 1325.7023     | -0.0036       | -3            | 46         | 58              | EGVVHGVTTVAEK        | 90             | 100            |              |      |
| 1505.7958                               | 1505.7883     | -0.0075       | -5            | 81         | 96              | TVEGAGNIAAATGFVK     |                |                |              |      |
| 1505.7958                               | 1505.7883     | -0.0075       | -5            | 81         | 96              | TVEGAGNIAAATGFVK     | 39             | 95.616         |              |      |
| 1505.7958                               | 1505.7883     | -0.0075       | -5            | 81         | 96              | TVEGAGNIAAATGFVK     | 86             | 100            |              |      |
| 1928.0447                               | 1928.0354     | -0.0093       | -5            | 61         | 80              | EQVTNVGGAVVTGVTAVAQK | 93             | 100            |              |      |
| 1928.0447                               | 1928.0354     | -0.0093       | -5            | 61         | 80              | EQVTNVGGAVVTGVTAVAQK | 30             | 68.165         |              |      |
| 1928.0447                               | 1928.0354     | -0.0093       | -5            | 61         | 80              | EQVTNVGGAVVTGVTAVAQK |                |                |              |      |

| Protein Name                                      | Accession No. | Peptide Count | Protein Score |            | Total Ion Score | Total Ion C.I. % | Best Ion Score | Best Ion C.I.% | % Coverage   |      |
|---------------------------------------------------|---------------|---------------|---------------|------------|-----------------|------------------|----------------|----------------|--------------|------|
|                                                   |               |               | Protein Score | C.I.%      |                 |                  |                |                |              |      |
| Cu-Zn superoxide dismutase<br>Peptide Information | gi 203658     | 5             | 362           | 100        | 304             |                  | 100            | 75             | 100          | 39.0 |
| Calc. Mass                                        | Obsrv. Mass   | ± da          | ± ppm         | Start Seq. | End Seq.        | Sequence         | Ion Score      | C. I. %        | Modification |      |
| 1095.5177                                         | 1095.4684     | -0.0493       | -45           | 72         | 81              | KHGGPADEER       |                |                |              |      |
| 1095.5177                                         | 1095.4684     | -0.0493       | -45           | 72         | 81              | KHGGPADEER       | 35             | 95.408         |              |      |
| 1137.6011                                         | 1137.5525     | -0.0486       | -43           | 82         | 93              | HVGD LGNVAAGK    |                |                |              |      |
| 1137.6011                                         | 1137.5525     | -0.0486       | -43           | 82         | 93              | HVGD LGNVAAGK    | 70             | 99.998         |              |      |
| 1174.5698                                         | 1174.5244     | -0.0454       | -39           | 94         | 104             | DGVANVSIEDR      |                |                |              |      |
| 1174.5698                                         | 1174.5244     | -0.0454       | -39           | 94         | 104             | DGVANVSIEDR      | 68             | 99.998         |              |      |
| 1174.5698                                         | 1174.5244     | -0.0454       | -39           | 94         | 104             | DGVANVSIEDR      | 58             | 99.977         |              |      |
| 1367.7642                                         | 1367.7257     | -0.0385       | -28           | 105        | 117             | VISLSGEHSIIGR    | 75             | 100            |              |      |
| 1367.7642                                         | 1367.7257     | -0.0385       | -28           | 105        | 117             | VISLSGEHSIIGR    | 34             | 93.72          |              |      |
| 1367.7642                                         | 1367.7257     | -0.0385       | -28           | 105        | 117             | VISLSGEHSIIGR    |                |                |              |      |
| 1510.7648                                         | 1510.7275     | -0.0373       | -25           | 12         | 25              | GDGPVQGVHFEQK    | 56             | 99.963         |              |      |
| 1510.7648                                         | 1510.7275     | -0.0373       | -25           | 12         | 25              | GDGPVQGVHFEQK    | 14             | 0              |              |      |
| 1510.7648                                         | 1510.7275     | -0.0373       | -25           | 12         | 25              | GDGPVQGVHFEQK    |                |                |              |      |

| Protein Name                                                       | Accession No. | Peptide Count | Protein Score |            | Total Ion Score | Total Ion C.I. %              | Best Ion Score | Best Ion C.I.% | % Coverage   |                   |
|--------------------------------------------------------------------|---------------|---------------|---------------|------------|-----------------|-------------------------------|----------------|----------------|--------------|-------------------|
|                                                                    |               |               | Protein Score | C.I.%      |                 |                               |                |                |              |                   |
| Protein phosphatase 3, regulatory subunit B<br>Peptide Information | gi 4506025    | 6             | 248           | 100        | 177             |                               | 100            | 61             | 99.984       | 54.1              |
| Calc. Mass                                                         | Obsrv. Mass   | ± da          | ± ppm         | Start Seq. | End Seq.        | Sequence                      | Ion Score      | C. I. %        | Modification |                   |
| 1187.6267                                                          | 1187.6246     | -0.0021       | -2            | 126        | 135             | DTQLQQIVDK                    |                |                |              |                   |
| 1187.6267                                                          | 1187.6246     | -0.0021       | -2            | 126        | 135             | DTQLQQIVDK                    | 17             | 0              |              |                   |
| 1187.6267                                                          | 1187.6246     | -0.0021       | -2            | 126        | 135             | DTQLQQIVDK                    | 15             | 0              |              |                   |
| 1274.6335                                                          | 1274.6373     | 0.0038        | 3             | 136        | 147             | TIINADKDG DGR                 |                |                |              |                   |
| 1369.6998                                                          | 1369.696      | -0.0038       | -3            | 74         | 85              | EFIEGVQFSVK                   | 28             | 66.431         |              |                   |
| 1369.6998                                                          | 1369.696      | -0.0038       | -3            | 74         | 85              | EFIEGVQFSVK                   |                |                |              |                   |
| 1369.6998                                                          | 1369.696      | -0.0038       | -3            | 74         | 85              | EFIEGVQFSVK                   | 55             | 99.93          |              |                   |
| 1582.8112                                                          | 1582.807      | -0.0042       | -3            | 104        | 117             | DGYISNGELFQVLK                | 61             | 99.984         |              |                   |
| 1582.8112                                                          | 1582.807      | -0.0042       | -3            | 104        | 117             | DGYISNGELFQVLK                | 18             | 0              |              |                   |
| 1582.8112                                                          | 1582.807      | -0.0042       | -3            | 104        | 117             | DGYISNGELFQVLK                |                |                |              |                   |
| 1783.8385                                                          | 1783.8372     | -0.0013       | -1            | 58         | 73              | VIDIFDTDGNGEVDFK              | 8              | 0              |              |                   |
| 1783.8385                                                          | 1783.8372     | -0.0013       | -1            | 58         | 73              | VIDIFDTDGNGEVDFK              |                |                |              |                   |
| 1783.8385                                                          | 1783.8372     | -0.0013       | -1            | 58         | 73              | VIDIFDTDGNGEVDFK              | 45             | 99.284         |              |                   |
| 3174.5623                                                          | 3174.5669     | 0.0046        | 1             | 30         | 57              | LDLNSGSLSV EEFMSLP ELQQNPLVQR |                |                |              | Oxidation (M)[15] |

| Protein Name                 | Accession No. | Peptide Count | Protein Score | Protein Score |          | Total Ion Score    | Total Ion C.I. % | Best Ion Score | Best Ion C.I. % | % Coverage |      |
|------------------------------|---------------|---------------|---------------|---------------|----------|--------------------|------------------|----------------|-----------------|------------|------|
|                              |               |               |               | C.I. %        |          |                    |                  |                |                 |            |      |
| Fatty acid binding protein 3 | gi 13162363   | 4             | 181           | 100           |          | 124                |                  | 100            | 67              | 99.996     | 39.8 |
| Peptide Information          |               |               |               |               |          |                    |                  |                |                 |            |      |
| Calc. Mass                   | Obsrv. Mass   | ± da          | ± ppm         | Start Seq.    | End Seq. | Sequence           | Ion Score        | C. I. %        | Modification    |            |      |
| 907.4995                     | 907.5041      | 0.0046        | 5             | 22            | 30       | SLGVGFATR          | 57               | 99.962         |                 |            |      |
| 907.4995                     | 907.5041      | 0.0046        | 5             | 22            | 30       | SLGVGFATR          | 52               | 99.884         |                 |            |      |
| 907.4995                     | 907.5041      | 0.0046        | 5             | 22            | 30       | SLGVGFATR          |                  |                |                 |            |      |
| 1206.575                     | 1206.5822     | 0.0072        | 6             | 97            | 106      | WDGQETTLTR         |                  |                |                 |            |      |
| 1206.575                     | 1206.5822     | 0.0072        | 6             | 97            | 106      | WDGQETTLTR         | 37               | 96.443         |                 |            |      |
| 1206.575                     | 1206.5822     | 0.0072        | 6             | 97            | 106      | WDGQETTLTR         | 67               | 99.996         |                 |            |      |
| 1523.8904                    | 1523.8967     | 0.0063        | 4             | 113           | 126      | LILTLTHGNVSTR      |                  |                |                 |            |      |
| 2285.0569                    | 2285.062      | 0.0051        | 2             | 59            | 78       | NTEISFQLGVFDEVADDR |                  |                |                 |            |      |

| Protein Name             | Accession No. | Peptide Count | Protein Score | Protein Score |          | Total Ion Score  | Total Ion C.I. % | Best Ion Score | Best Ion C.I. %        | % Coverage        |      |
|--------------------------|---------------|---------------|---------------|---------------|----------|------------------|------------------|----------------|------------------------|-------------------|------|
|                          |               |               |               | C.I. %        |          |                  |                  |                |                        |                   |      |
| Profilin-2 (Profilin II) | gi 20178018   | 6             | 340           | 100           |          | 249              |                  | 100            | 79                     | 100               | 43.6 |
| Peptide Information      |               |               |               |               |          |                  |                  |                |                        |                   |      |
| Calc. Mass               | Obsrv. Mass   | ± da          | ± ppm         | Start Seq.    | End Seq. | Sequence         | Ion Score        | C. I. %        | Modification           |                   |      |
| 908.5273                 | 908.52        | -0.0073       | -8            | 108           | 115      | VLVFMVGMK        | 37               | 95.875         | Oxidation (M)[6]       |                   |      |
| 908.5273                 | 908.52        | -0.0073       | -8            | 108           | 115      | VLVFMVGMK        |                  |                | Oxidation (M)[6]       |                   |      |
| 967.4955                 | 967.4948      | -0.0007       | -1            | 116           | 125      | EGVHGGGLNK       | 52               | 99.876         |                        |                   |      |
| 967.4955                 | 967.4948      | -0.0007       | -1            | 116           | 125      | EGVHGGGLNK       | 77               | 100            |                        |                   |      |
| 967.4955                 | 967.4948      | -0.0007       | -1            | 116           | 125      | EGVHGGGLNK       |                  |                |                        |                   |      |
| 1340.6844                | 1340.6814     | -0.003        | -2            | 56            | 68       | EGFFTNGTLGGK     |                  |                |                        |                   |      |
| 1340.6844                | 1340.6814     | -0.003        | -2            | 56            | 68       | EGFFTNGTLGGK     | 33               | 88.186         |                        |                   |      |
| 1434.6971                | 1434.7017     | 0.0046        | 3             | 91            | 104      | SQGGPEPTYNAVAVGR | 79               | 100            |                        |                   |      |
| 1434.6971                | 1434.7017     | 0.0046        | 3             | 91            | 104      | SQGGPEPTYNAVAVGR | 45               | 99.397         |                        |                   |      |
| 1434.6971                | 1434.7017     | 0.0046        | 3             | 91            | 104      | SQGGPEPTYNAVAVGR |                  |                |                        |                   |      |
| 1611.8125                | 1611.8138     | 0.0013        | 1             | 54            | 68       | DREGFFTNGTLGGK   |                  |                |                        |                   |      |
| 1611.8125                | 1611.8138     | 0.0013        | 1             | 54            | 68       | DREGFFTNGTLGGK   |                  |                |                        |                   |      |
| 1705.7045                | 1705.6942     | -0.0103       | -6            | 75            | 88       | DSLYVSDSDCTMDIR  |                  |                |                        | Oxidation (M)[11] |      |
| 1705.7045                | 1705.6942     | -0.0103       | -6            | 75            | 88       | DSLYVSDSDCTMDIR  | 19               | 0              | Carbamidomethyl (C)[9] |                   |      |
| 1705.7045                | 1705.6942     | -0.0103       | -6            | 75            | 88       | DSLYVSDSDCTMDIR  | 23               | 0              | Carbamidomethyl (C)[9] |                   |      |

| Protein Name                     | Accession No. | Peptide Count | Protein Score | Protein Score |          | Total Ion Score | Total Ion C.I. % | Best Ion Score | Best Ion C.I. % | % Coverage |      |
|----------------------------------|---------------|---------------|---------------|---------------|----------|-----------------|------------------|----------------|-----------------|------------|------|
|                                  |               |               |               | C.I. %        |          |                 |                  |                |                 |            |      |
| Endoplasmic reticulum protein 29 | gi 16758848   | 7             | 203           | 100           |          | 121             |                  | 100            | 42              | 98.165     | 30.4 |
| Peptide Information              |               |               |               |               |          |                 |                  |                |                 |            |      |
| Calc. Mass                       | Obsrv. Mass   | ± da          | ± ppm         | Start Seq.    | End Seq. | Sequence        | Ion Score        | C. I. %        | Modification    |            |      |
| 802.4417                         | 802.4583      | 0.0166        | 21            | 237           | 242      | KEELQR          | 24               | 0              |                 |            |      |
| 802.4417                         | 802.4583      | 0.0166        | 21            | 237           | 242      | KEELQR          | 27               | 46.219         |                 |            |      |
| 802.4417                         | 802.4583      | 0.0166        | 21            | 237           | 242      | KEELQR          |                  |                |                 |            |      |
| 822.4104                         | 822.4362      | 0.0258        | 31            | 70            | 75       | QDEFKR          | 13               | 0              |                 |            |      |
| 822.4104                         | 822.4362      | 0.0258        | 31            | 70            | 75       | QDEFKR          |                  |                |                 |            |      |
| 1034.5994                        | 1034.6095     | 0.0101        | 10            | 243           | 251      | SLNLTAFR        | 39               | 96.528         |                 |            |      |
| 1034.5994                        | 1034.6095     | 0.0101        | 10            | 243           | 251      | SLNLTAFR        |                  |                |                 |            |      |
| 1034.5994                        | 1034.6095     | 0.0101        | 10            | 243           | 251      | SLNLTAFR        | 19               | 0              |                 |            |      |
| 1247.5579                        | 1247.5643     | 0.0064        | 5             | 60            | 69       | FDTQYPYGEK      |                  |                |                 |            |      |
| 1320.6622                        | 1320.6678     | 0.0056        | 4             | 113           | 122      | ESYPVFYLFYR     |                  |                |                 |            |      |
| 1320.6622                        | 1320.6678     | 0.0056        | 4             | 113           | 122      | ESYPVFYLFYR     |                  |                |                 |            |      |
| 1324.7147                        | 1324.7227     | 0.008         | 6             | 37            | 48       | GALPLDVTYFYK    |                  |                |                 |            |      |
| 1660.8176                        | 1660.8188     | 0.0012        | 1             | 209           | 223      | ILDQGDFPASELAR  |                  |                |                 |            |      |
| 1660.8176                        | 1660.8188     | 0.0012        | 1             | 209           | 223      | ILDQGDFPASELAR  | 42               | 98.165         |                 |            |      |
| 1660.8176                        | 1660.8188     | 0.0012        | 1             | 209           | 223      | ILDQGDFPASELAR  | 42               | 98.144         |                 |            |      |
